# Supplementary material
Source: publisher figshare collection journal article supplement (https://acs.figshare.com/ndownloader/files/5689056)
Supplement: Supplementary file 1 [file 5689056]

# ic001008c.cif

data_global
 
_audit_creation_method                 Xtal3.6
_audit_creation_date                   99-06-04
_audit_update_record                   ?
 
#==============================================================================
#   (Publishing Staff Use Only)
 
_journal_date_recd_electronic          ?
_journal_date_to_coeditor              ?
_journal_date_from_coeditor            ?
_journal_date_accepted                 ?
_journal_date_printers_first           ?
_journal_date_printers_final           ?
_journal_date_proofs_out               ?
_journal_date_proofs_in                ?
_journal_coeditor_name                 ?
_journal_coeditor_code                 ?
_journal_coeditor_notes
; ?
;
_journal_techeditor_code               ?
_journal_techeditor_notes
; ?
;
_journal_coden_ASTM                    ?
_journal_name_full                     ?
_journal_year                          ?
_journal_volume                        ?
_journal_issue                         ?
_journal_page_first                    ?
_journal_page_last                     ?
_journal_suppl_publ_number             ?
_journal_suppl_publ_pages              ?
 
#=======================================================================
 
# 1. SUBMISSION DETAILS
#----------------------
 
_publ_contact_author_name
     'Skelton, B. W.'
_publ_contact_author_address
;
   Department of Chemistry
   University of Western Australia
   Nedlands
   Western Australia 6907
   Australia
;
_publ_contact_author_email            bws@crystal.uwa.edu.au
_publ_contact_author_fax               (+61)_08_9380_1118
_publ_contact_author_phone             (+61)_08-9380_3481
 
_publ_contact_letter
;    ?                                      #<< contact letter
;
 
_publ_requested_journal   'Inorg.Chem.'
_publ_requested_category  ? 
 
_publ_section_title
;    ?                                      #<< paper title text
;
_publ_section_title_footnote
;    ?                                      #<< paper footnote text
;
 
loop_
_publ_author_name
_publ_author_footnote
_publ_author_address
 
 
'Skelton, Brian W.' .
; Crystallography Centre,
University of Western Australia,
Nedlands,
WA 6907
Australia.
;
 
 
_publ_section_synopsis
;    ?                                     #<< synopsis if FI,CI,CM,CO papers
;
_publ_section_abstract
;    ?                                     #<< abstract text
;
_publ_section_comment
;    ?                                     #<< scientific commentary text
;
 
_publ_section_exptl_prep
;    ?                        #<< material & crystal preparation text
;
 
_publ_section_exptl_refinement
;    ?                        #<< crystallographic methods used
;
 
_publ_section_acknowledgements
;    ?                                     #<< acknowledgements text
;
 
_publ_section_references
;
 Siemens (1995). SMART and SAINT. Area-Detector Control and Integration
 Software. Siemens Analytical X-ray Systems Inc., Madison, Wisconsin, USA.
 
 Hall, S.R., King, G.S.D., and Stewart., J.M. (1995).
 The Xtal 3.5 User's Manual.  University of Western Australia, Lamb: Perth.
;
_publ_section_figure_captions
;    ?                                     #<< figure captions
;
 
 
#=======================================================================
#  Data block for single structure (one for each study in the paper)
#=======================================================================
 
 
data_s4as
 
 
# 2. EXPERIMENTAL DATA
#---------------------
 
 
_chemical_formula_sum                 'C40 H48 O4 S4'
_chemical_formula_moiety               ?
_chemical_formula_weight               721.08
_chemical_melting_point                ?
 
_symmetry_cell_setting                 monoclinic
_symmetry_space_group_name_H-M         P_1_21/c_1
_symmetry_space_group_name_Hall        -p_2ybc
 
loop_
_symmetry_equiv_pos_as_xyz
  +x,+y,+z  -x,1/2+y,1/2-z  -x,-y,-z  +x,1/2-y,1/2+z
 
_cell_length_a                         9.4579(8)
_cell_length_b                         31.247(3)
_cell_length_c                         13.7720(18)
_cell_angle_alpha                      90.00000
_cell_angle_beta                       108.497(2)
_cell_angle_gamma                      90.00000
_cell_volume                           3859.8(7)
_cell_formula_units_Z                  4
 
_exptl_crystal_density_diffrn          1.241
_exptl_crystal_density_meas            ?
_exptl_crystal_density_method          ?
_diffrn_radiation_type                'Mo K\a'
_diffrn_radiation_wavelength           .71073
 
_cell_measurement_reflns_used          8192
_cell_measurement_theta_min            2   
_cell_measurement_theta_max            26 
_cell_measurement_temperature          153
 
_exptl_absorpt_coefficient_mu          .285
_exptl_crystal_description             cuboid
_exptl_crystal_size_max                .22
_exptl_crystal_size_mid                .21
_exptl_crystal_size_min                .20
_exptl_crystal_size_rad                ?
_exptl_crystal_colour                  colourless
 
_diffrn_measurement_device_type
;
Bruker SMART CCD diffractometer
;
_diffrn_measurement_method             '\w scans'
_diffrn_detector_area_resol_mean       ?
 
_exptl_absorpt_correction_type         none        
_exptl_absorpt_process_details         ?
_exptl_absorpt_correction_T_min        ?
_exptl_absorpt_correction_T_max        ?
 
_diffrn_reflns_number                  42367
_reflns_number_total                   9824
_reflns_Friedel_coverage               0
_reflns_number_gt                      7347
_reflns_threshold_expression          'F    > 4.00 sig(F   )'
 
_diffrn_reflns_theta_max               29.3
_diffrn_reflns_theta_full              ?
_diffrn_measured_fraction_theta_max    ?
_diffrn_measured_fraction_theta_full   ?
_diffrn_reflns_av_R_equivalents        .064
_diffrn_reflns_limit_h_min             -12
_diffrn_reflns_limit_h_max             11
_diffrn_reflns_limit_k_min             0
_diffrn_reflns_limit_k_max             42
_diffrn_reflns_limit_l_min             0
_diffrn_reflns_limit_l_max             18
_diffrn_standards_number               ?
_diffrn_standards_interval_count       ?
_diffrn_standards_interval_time        ?            #<< do not append units
_diffrn_standards_decay_%              0            #<< do not append %
 
 
_refine_ls_structure_factor_coef       F
_refine_ls_R_factor_gt                 .045
_refine_ls_wR_factor_ref               .055
_refine_ls_goodness_of_fit_ref         1.492
_refine_ls_number_reflns               7347
_refine_ls_number_parameters           704
_refine_ls_weighting_scheme            calc
_refine_ls_weighting_details           ?
_refine_ls_hydrogen_treatment          refall
_refine_ls_shift/su_max                .03
_refine_diff_density_min               -.332
_refine_diff_density_max               .598
 
_refine_ls_extinction_method           ?
_refine_ls_extinction_coef             .00000
_refine_ls_abs_structure_details       ?
_refine_ls_abs_structure_Flack         ?
 
 
# 3. Information for the "methods" section
#-----------------------------------------
 
_computing_data_collection             'Siemens SMART (Siemens, 1995)'
_computing_cell_refinement             'Siemens SAINT (Siemens, 1995)'
_computing_data_reduction             'xtal ADDREF SORTRF'
_computing_structure_solution          xtal
_computing_structure_refinement       'xtal CRYLSQ'
_computing_molecular_graphics          xtal
_computing_publication_material       'xtal BONDLA CIFIO'
 
 
# 4. Supplementary data for validation and tables
#------------------------------------------------
 
loop_
_atom_type_symbol
_atom_type_description
_atom_type_oxidation_number
_atom_type_number_in_cell
_atom_type_scat_dispersion_real
_atom_type_scat_dispersion_imag
_atom_type_scat_source
  C  ?  0  160  .002  .002  'Int Tables Vol IV Tables 2.2B and 2.3.1'
  H  ?  0  192  0  0  'Int Tables Vol IV Tables 2.2B and 2.3.1'
  O  ?  0  16  .008  .006  'Int Tables Vol IV Tables 2.2B and 2.3.1'
  S  ?  0  16  .11  .124  'Int Tables Vol IV Tables 2.2B and 2.3.1'
 
loop_
_atom_site_label
_atom_site_fract_x
_atom_site_fract_y
_atom_site_fract_z
_atom_site_U_iso_or_equiv
_atom_site_adp_type
_atom_site_calc_flag
_atom_site_calc_attached_atom
_atom_site_occupancy
_atom_site_disorder_assembly
_atom_site_disorder_group
  O11  .2890(2)  .12669(6)  .79161(15)  .0289(9)  Uani  ?  ?  1.00000  ?  ?
  C11  .1570(2)  .10854(7)  .73717(16)  .0208(10)  Uani  ?  ?  1.00000  ?  ?
  C12  .1442(2)  .06407(7)  .72478(16)  .0217(10)  Uani  ?  ?  1.00000  ?  ?
  C13  .0098(3)  .04627(8)  .66559(17)  .0232(10)  Uani  ?  ?  1.00000  ?  ?
  C14  -.1159(2)  .07160(7)  .61855(17)  .0234(10)  Uani  ?  ?  1.00000  ?  ?
  C141  -.2612(2)  .05042(8)  .55149(18)  .0265(11)  Uani  ?  ?  1.00000  ?  ?
  C142  -.2304(3)  .02504(10)  .4651(2)  .0369(13)  Uani  ?  ?  1.00000  ?  ?
  C143  -.3183(3)  .02016(10)  .6185(2)  .0345(13)  Uani  ?  ?  1.00000  ?  ?
  C144  -.3819(3)  .08345(10)  .5035(3)  .0414(14)  Uani  ?  ?  1.00000  ?  ?
  C15  -.1011(2)  .11531(8)  .63353(17)  .0233(10)  Uani  ?  ?  1.00000  ?  ?
  C16  .0319(2)  .13432(7)  .69159(16)  .0214(10)  Uani  ?  ?  1.00000  ?  ?
  S1  .04647(7)  .190980(19)  .69739(4)  .0262(3)  Uani  ?  ?  1.00000  ?  ?
  O21  .43070(18)  .08200(6)  .96858(15)  .0261(8)  Uani  ?  ?  1.00000  ?  ?
  C21  .3653(2)  .04492(7)  .98337(17)  .0218(10)  Uani  ?  ?  1.00000  ?  ?
  C22  .3666(2)  .03307(7)  1.08192(17)  .0223(10)  Uani  ?  ?  1.00000  ?  ?
  C23  .3019(2)  -.00558(8)  1.09537(19)  .0248(11)  Uani  ?  ?  1.00000  ?  ?
  C24  .2352(2)  -.03348(7)  1.01488(18)  .0238(10)  Uani  ?  ?  1.00000  ?  ?
  C241  .1635(3)  -.07566(8)  1.0336(2)  .0290(11)  Uani  ?  ?  1.00000  ?  ?
  C242  .2721(4)  -.10078(11)  1.1213(3)  .0494(17)  Uani  ?  ?  1.00000  ?  ?
  C243  .0265(4)  -.06466(13)  1.0663(4)  .066(2)  Uani  ?  ?  1.00000  ?  ?
  C244  .1181(6)  -.10404(13)  .9407(3)  .066(2)  Uani  ?  ?  1.00000  ?  ?
  C25  .2348(2)  -.02069(8)  .91743(18)  .0240(10)  Uani  ?  ?  1.00000  ?  ?
  C26  .2972(2)  .01785(7)  .90100(17)  .0221(10)  Uani  ?  ?  1.00000  ?  ?
  S2  .30351(6)  .03054(2)  .77612(4)  .0249(3)  Uani  ?  ?  1.00000  ?  ?
  O31  .4127(2)  .14994(7)  1.08143(14)  .0287(9)  Uani  ?  ?  1.00000  ?  ?
  C31  .3406(2)  .14439(7)  1.15144(17)  .0229(10)  Uani  ?  ?  1.00000  ?  ?
  C32  .2575(2)  .17839(7)  1.17250(18)  .0244(10)  Uani  ?  ?  1.00000  ?  ?
  C33  .1926(3)  .17436(8)  1.24921(18)  .0277(11)  Uani  ?  ?  1.00000  ?  ?
  C34  .2039(3)  .13666(8)  1.30601(18)  .0279(11)  Uani  ?  ?  1.00000  ?  ?
  C341  .1392(3)  .13477(9)  1.3952(2)  .0400(14)  Uani  ?  ?  1.00000  ?  ?
  C342  .2374(6)  .16425(13)  1.4809(3)  .065(2)  Uani  ?  ?  1.00000  ?  ?
  C343  -.0184(5)  .15224(17)  1.3624(4)  .073(3)  Uani  ?  ?  1.00000  ?  ?
  C344  .1456(4)  .08997(11)  1.4397(3)  .0482(17)  Uani  ?  ?  1.00000  ?  ?
  C35  .2804(3)  .10263(8)  1.28018(18)  .0254(11)  Uani  ?  ?  1.00000  ?  ?
  C36  .3496(2)  .10598(7)  1.20469(17)  .0232(10)  Uani  ?  ?  1.00000  ?  ?
  S3  .46942(6)  .063602(19)  1.19155(4)  .0246(3)  Uani  ?  ?  1.00000  ?  ?
  O41  .2670(2)  .19657(6)  .90727(18)  .0282(9)  Uani  ?  ?  1.00000  ?  ?
  C41  .1255(2)  .20669(7)  .90436(17)  .0222(10)  Uani  ?  ?  1.00000  ?  ?
  C42  .0078(2)  .20425(7)  .81257(17)  .0231(10)  Uani  ?  ?  1.00000  ?  ?
  C43  -.1362(3)  .21512(7)  .81023(19)  .0259(10)  Uani  ?  ?  1.00000  ?  ?
  C44  -.1689(2)  .22799(7)  .8977(2)  .0266(11)  Uani  ?  ?  1.00000  ?  ?
  C441  -.3270(3)  .24109(8)  .8953(2)  .0359(13)  Uani  ?  ?  1.00000  ?  ?
  C442  -.3512(16)  .2894(5)  .855(2)  .091(10)  Uani  ?  ?  .50000  ?  ?
  C442'  -.3296(15)  .2884(4)  .9136(10)  .049(5)  Uani  ?  ?  .50000  ?  ?
  C443  -.445(3)  .2147(6)  .803(2)  .045(7)  Uani  ?  ?  .50000  ?  ?
  C443'  -.445(3)  .2274(6)  .8093(18)  .038(6)  Uani  ?  ?  .50000  ?  ?
  C444  -.358(2)  .2362(6)  .9907(15)  .066(8)  Uani  ?  ?  .50000  ?  ?
  C444'  -.356(2)  .2187(3)  .9922(15)  .038(5)  Uani  ?  ?  .50000  ?  ?
  C45  -.0487(3)  .23041(7)  .9884(2)  .0249(10)  Uani  ?  ?  1.00000  ?  ?
  C46  .0965(2)  .22030(7)  .99307(18)  .0233(10)  Uani  ?  ?  1.00000  ?  ?
  S4  .24749(6)  .228313(18)  1.10816(5)  .0259(3)  Uani  ?  ?  1.00000  ?  ?
  H13  .004(3)  .0169(8)  .6588(18)  .024(6)  Uiso  ?  ?  1.00000  ?  ?
  H142a  -.324(3)  .0102(9)  .419(2)  .042(8)  Uiso  ?  ?  1.00000  ?  ?
  H142b  -.151(3)  .0017(9)  .493(2)  .044(8)  Uiso  ?  ?  1.00000  ?  ?
  H142c  -.201(3)  .0458(10)  .423(2)  .042(8)  Uiso  ?  ?  1.00000  ?  ?
  H143a  -.405(3)  .0024(9)  .577(2)  .041(8)  Uiso  ?  ?  1.00000  ?  ?
  H143b  -.360(3)  .0393(10)  .665(2)  .049(9)  Uiso  ?  ?  1.00000  ?  ?
  H143c  -.242(3)  -.0016(10)  .658(2)  .047(9)  Uiso  ?  ?  1.00000  ?  ?
  H144a  -.471(4)  .0699(10)  .459(3)  .055(9)  Uiso  ?  ?  1.00000  ?  ?
  H144b  -.355(3)  .1053(10)  .456(2)  .045(8)  Uiso  ?  ?  1.00000  ?  ?
  H144c  -.407(3)  .1005(10)  .556(2)  .047(9)  Uiso  ?  ?  1.00000  ?  ?
  H15  -.189(3)  .1350(8)  .6033(18)  .024(6)  Uiso  ?  ?  1.00000  ?  ?
  H23  .311(3)  -.0126(8)  1.165(2)  .024(6)  Uiso  ?  ?  1.00000  ?  ?
  H242a  .221(4)  -.1287(12)  1.137(3)  .064(10)  Uiso  ?  ?  1.00000  ?  ?
  H242b  .286(5)  -.0866(14)  1.179(4)  .094(15)  Uiso  ?  ?  1.00000  ?  ?
  H242c  .367(6)  -.1105(15)  1.093(4)  .123(17)  Uiso  ?  ?  1.00000  ?  ?
  H243a  -.029(5)  -.0971(14)  1.078(3)  .099(14)  Uiso  ?  ?  1.00000  ?  ?
  H243b  -.045(3)  -.0571(11)  .999(2)  .063(11)  Uiso  ?  ?  1.00000  ?  ?
  H243c  .054(8)  -.048(3)  1.124(6)  .20(3)  Uiso  ?  ?  1.00000  ?  ?
  H244a  .079(5)  -.1360(15)  .954(3)  .100(14)  Uiso  ?  ?  1.00000  ?  ?
  H244b  .212(4)  -.1132(10)  .934(2)  .045(9)  Uiso  ?  ?  1.00000  ?  ?
  H244c  .030(6)  -.0902(16)  .875(4)  .120(17)  Uiso  ?  ?  1.00000  ?  ?
  H25  .189(3)  -.0381(8)  .860(2)  .030(7)  Uiso  ?  ?  1.00000  ?  ?
  H33  .144(3)  .1996(9)  1.263(2)  .031(7)  Uiso  ?  ?  1.00000  ?  ?
  H343a  -.051(5)  .1529(15)  1.427(4)  .108(15)  Uiso  ?  ?  1.00000  ?  ?
  H343b  -.073(3)  .1294(8)  1.314(2)  .015(6)  Uiso  ?  ?  1.00000  ?  ?
  H343c  -.019(5)  .1877(16)  1.344(3)  .104(15)  Uiso  ?  ?  1.00000  ?  ?
  H344a  .093(4)  .0908(11)  1.490(3)  .064(10)  Uiso  ?  ?  1.00000  ?  ?
  H344b  .256(4)  .0795(10)  1.470(2)  .054(9)  Uiso  ?  ?  1.00000  ?  ?
  H344c  .085(4)  .0700(11)  1.382(3)  .063(10)  Uiso  ?  ?  1.00000  ?  ?
  H342a  .196(4)  .1671(12)  1.537(3)  .081(12)  Uiso  ?  ?  1.00000  ?  ?
  H342b  .237(5)  .1976(16)  1.459(3)  .105(15)  Uiso  ?  ?  1.00000  ?  ?
  H342c  .350(6)  .1536(16)  1.507(4)  .13(2)  Uiso  ?  ?  1.00000  ?  ?
  H35  .291(3)  .0767(8)  1.315(2)  .024(6)  Uiso  ?  ?  1.00000  ?  ?
  H43  -.210(3)  .2141(8)  .749(2)  .023(6)  Uiso  ?  ?  1.00000  ?  ?
  H443a  -.555(9)  .222(3)  .793(6)  .04(2)  Uiso  ?  ?  .50000  ?  ?
  H443b  -.434(5)  .1895(17)  .832(4)  .007(12)  Uiso  ?  ?  .50000  ?  ?
  H443c  -.440(7)  .226(3)  .730(6)  .04(2)  Uiso  ?  ?  .50000  ?  ?
  H443'a  -.540(8)  .236(2)  .818(5)  .03(2)  Uiso  ?  ?  .50000  ?  ?
  H443'b  -.441(5)  .1959(18)  .778(4)  .004(14)  Uiso  ?  ?  .50000  ?  ?
  H443'c  -.420(12)  .249(4)  .752(10)  .12(4)  Uiso  ?  ?  .50000  ?  ?
  H442a  -.454(8)  .296(2)  .847(6)  .06(2)  Uiso  ?  ?  .50000  ?  ?
  H442b  -.342(9)  .290(3)  .787(6)  .05(3)  Uiso  ?  ?  .50000  ?  ?
  H442c  -.277(6)  .305(2)  .912(6)  .021(15)  Uiso  ?  ?  .50000  ?  ?
  H442'a  -.441(6)  .2982(16)  .910(4)  .020(13)  Uiso  ?  ?  .50000  ?  ?
  H442'b  -.304(7)  .306(2)  .846(6)  .023(15)  Uiso  ?  ?  .50000  ?  ?
  H442'c  -.265(6)  .2977(17)  .980(4)  .024(14)  Uiso  ?  ?  .50000  ?  ?
  H444a  -.460(9)  .248(3)  .987(6)  .07(3)  Uiso  ?  ?  .50000  ?  ?
  H444b  -.292(9)  .259(3)  1.035(7)  .06(2)  Uiso  ?  ?  .50000  ?  ?
  H444c  -.304(13)  .203(4)  1.062(10)  .13(4)  Uiso  ?  ?  .50000  ?  ?
  H444'a  -.467(7)  .226(2)  .993(5)  .036(17)  Uiso  ?  ?  .50000  ?  ?
  H444'b  -.290(7)  .230(3)  1.056(5)  .035(16)  Uiso  ?  ?  .50000  ?  ?
  H444'c  -.362(6)  .191(2)  .989(4)  .024(15)  Uiso  ?  ?  .50000  ?  ?
  H45  -.062(3)  .2387(9)  1.048(2)  .036(8)  Uiso  ?  ?  1.00000  ?  ?
  H11a  .278(6)  .162(2)  .820(4)  .043(16)  Uiso  ?  ?  .50000  ?  ?
  H11b  .332(5)  .1139(15)  .824(4)  .005(13)  Uiso  ?  ?  .50000  ?  ?
  H21a  .405(6)  .0900(16)  .912(4)  .021(14)  Uiso  ?  ?  .50000  ?  ?
  H21b  .439(6)  .104(2)  1.010(5)  .033(15)  Uiso  ?  ?  .50000  ?  ?
  H31a  .438(5)  .1322(18)  1.066(4)  .010(14)  Uiso  ?  ?  .50000  ?  ?
  H31b  .388(5)  .1744(18)  1.048(4)  .023(13)  Uiso  ?  ?  .50000  ?  ?
  H41a  .305(6)  .1918(19)  .955(5)  .022(17)  Uiso  ?  ?  .50000  ?  ?
  H41b  .263(12)  .202(4)  .844(10)  .15(5)  Uiso  ?  ?  .50000  ?  ?
 
loop_
_atom_site_aniso_label
_atom_site_aniso_U_11
_atom_site_aniso_U_22
_atom_site_aniso_U_33
_atom_site_aniso_U_12
_atom_site_aniso_U_13
_atom_site_aniso_U_23
  O11  .0236(9)  .0289(11)  .0299(10)  -.0029(8)  .0024(8)  .0017(8)
  C11  .0218(10)  .0259(12)  .0159(10)  -.0010(9)  .0076(8)  .0019(8)
  C12  .0223(10)  .0266(12)  .0169(10)  .0032(9)  .0074(8)  .0013(9)
  C13  .0285(12)  .0223(12)  .0189(11)  -.0000(9)  .0076(9)  -.0004(9)
  C14  .0249(11)  .0273(12)  .0187(11)  -.0011(9)  .0078(9)  -.0007(9)
  C141  .0249(11)  .0285(13)  .0234(12)  -.0032(9)  .0040(9)  -.0010(10)
  C142  .0360(15)  .0471(17)  .0267(14)  -.0088(13)  .0089(11)  -.0088(12)
  C143  .0321(14)  .0414(16)  .0288(13)  -.0108(12)  .0079(11)  -.0014(12)
  C144  .0291(14)  .0383(16)  .0443(17)  -.0001(12)  -.0060(13)  -.0010(14)
  C15  .0226(11)  .0271(12)  .0201(11)  .0016(9)  .0064(9)  .0018(9)
  C16  .0258(11)  .0201(11)  .0183(11)  -.0014(9)  .0072(9)  .0013(9)
  S1  .0336(3)  .0210(3)  .0227(3)  -.0012(2)  .0072(2)  .0043(2)
  O21  .0295(9)  .0247(9)  .0247(10)  .0002(7)  .0095(7)  .0005(8)
  C21  .0200(10)  .0225(11)  .0234(11)  .0057(8)  .0077(9)  .0007(9)
  C22  .0226(10)  .0234(12)  .0203(11)  .0075(9)  .0061(9)  -.0014(9)
  C23  .0246(11)  .0267(12)  .0244(12)  .0083(9)  .0096(9)  .0040(9)
  C24  .0213(10)  .0233(12)  .0281(12)  .0047(9)  .0096(9)  .0020(9)
  C241  .0265(12)  .0259(13)  .0362(14)  .0009(9)  .0122(10)  .0033(10)
  C242  .057(2)  .0309(17)  .054(2)  -.0041(14)  .0081(16)  .0140(15)
  C243  .0426(19)  .055(2)  .114(4)  .0073(16)  .045(2)  .024(2)
  C244  .099(3)  .048(2)  .053(2)  -.035(2)  .025(2)  -.0094(17)
  C25  .0214(11)  .0252(12)  .0243(12)  .0058(9)  .0056(9)  -.0021(10)
  C26  .0224(10)  .0244(12)  .0198(11)  .0077(8)  .0071(9)  .0004(9)
  S2  .0273(3)  .0282(3)  .0202(3)  .0075(2)  .0089(2)  -.0001(2)
  O31  .0336(10)  .0262(11)  .0310(10)  .0044(8)  .0168(8)  .0011(8)
  C31  .0219(10)  .0250(12)  .0208(11)  .0024(9)  .0053(9)  -.0025(9)
  C32  .0246(11)  .0212(11)  .0245(12)  .0024(9)  .0037(9)  -.0019(9)
  C33  .0284(12)  .0267(13)  .0275(13)  .0067(10)  .0080(10)  -.0040(10)
  C34  .0302(12)  .0293(13)  .0248(12)  .0053(10)  .0098(10)  -.0021(10)
  C341  .0522(17)  .0393(16)  .0383(15)  .0167(13)  .0281(13)  .0035(12)
  C342  .107(3)  .057(2)  .045(2)  -.002(2)  .045(2)  -.0109(17)
  C343  .068(3)  .094(3)  .077(3)  .036(2)  .051(2)  .021(3)
  C344  .062(2)  .0471(19)  .051(2)  .0100(16)  .0400(18)  .0074(15)
  C35  .0261(11)  .0262(13)  .0229(12)  .0034(9)  .0063(9)  .0001(10)
  C36  .0213(10)  .0240(12)  .0217(11)  .0059(8)  .0033(9)  -.0023(9)
  S3  .0248(3)  .0261(3)  .0207(3)  .0085(2)  .0039(2)  -.0012(2)
  O41  .0207(8)  .0350(11)  .0275(11)  .0009(7)  .0055(8)  .0002(9)
  C41  .0224(10)  .0178(11)  .0256(12)  -.0008(8)  .0061(9)  .0011(9)
  C42  .0262(11)  .0178(11)  .0227(11)  -.0017(8)  .0041(9)  .0024(9)
  C43  .0230(11)  .0211(12)  .0277(13)  -.0012(9)  -.0004(10)  .0004(10)
  C44  .0220(11)  .0201(11)  .0360(14)  -.0011(9)  .0066(10)  -.0006(10)
  C441  .0217(12)  .0318(14)  .0528(18)  -.0004(10)  .0099(11)  -.0034(12)
  C442  .032(6)  .041(6)  .20(2)  .013(4)  .042(11)  .038(12)
  C442'  .032(5)  .031(5)  .086(8)  .003(3)  .020(6)  .003(5)
  C443  .023(4)  .049(12)  .055(7)  -.003(7)  -.000(4)  -.026(8)
  C443'  .027(4)  .052(11)  .035(5)  -.000(7)  .012(3)  -.016(7)
  C444  .026(4)  .125(14)  .046(7)  .004(10)  .008(4)  -.034(11)
  C444'  .028(4)  .046(6)  .042(5)  -.003(5)  .015(3)  -.001(5)
  C45  .0277(12)  .0196(11)  .0276(13)  -.0001(9)  .0088(10)  -.0012(9)
  C46  .0226(11)  .0182(11)  .0259(12)  -.0009(8)  .0030(9)  -.0001(9)
  S4  .0273(3)  .0198(3)  .0259(3)  .0016(2)  .0019(2)  -.0029(2)
 
 
# 5. Molecular Geometry
#----------------------
 
loop_
_geom_bond_atom_site_label_1
_geom_bond_atom_site_label_2
_geom_bond_site_symmetry_1
_geom_bond_site_symmetry_2
_geom_bond_distance
_geom_bond_publ_flag                 #<< enter YES for value to be published
  O11  C11  .  .  1.359(3)  ?
  O11  H11a  .  .  1.20(7)  ?
  O11  H11b  .  .  .64(4)  ?
  C11  C12  .  .  1.401(3)  ?
  C11  C16  .  .  1.404(3)  ?
  C12  C13  .  .  1.390(3)  ?
  C12  S2  .  .  1.787(2)  ?
  C13  C14  .  .  1.404(3)  ?
  C13  H13  .  .  .92(3)  ?
  C14  C141  .  .  1.541(3)  ?
  C14  C15  .  .  1.382(3)  ?
  C141  C142  .  .  1.533(4)  ?
  C141  C143  .  .  1.534(4)  ?
  C141  C144  .  .  1.525(4)  ?
  C142  H142a  .  .  1.02(3)  ?
  C142  H142b  .  .  1.03(3)  ?
  C142  H142c  .  .  .97(3)  ?
  C143  H143a  .  .  1.00(3)  ?
  C143  H143b  .  .  1.04(3)  ?
  C143  H143c  .  .  1.01(3)  ?
  C144  H144a  .  .  .97(3)  ?
  C144  H144b  .  .  1.03(3)  ?
  C144  H144c  .  .  .98(4)  ?
  C15  C16  .  .  1.391(3)  ?
  C15  H15  .  .  1.01(2)  ?
  C16  S1  .  .  1.776(2)  ?
  S1  C42  .  .  1.786(3)  ?
  O21  C21  .  .  1.359(3)  ?
  O21  H21a  .  .  .78(6)  ?
  O21  H21b  .  .  .89(6)  ?
  C21  C22  .  .  1.403(3)  ?
  C21  C26  .  .  1.398(3)  ?
  C22  C23  .  .  1.392(3)  ?
  C22  S3  .  .  1.790(2)  ?
  C23  C24  .  .  1.394(3)  ?
  C23  H23  .  .  .96(3)  ?
  C24  C241  .  .  1.541(3)  ?
  C24  C25  .  .  1.399(4)  ?
  C241  C242  .  .  1.531(4)  ?
  C241  C243  .  .  1.539(6)  ?
  C241  C244  .  .  1.503(5)  ?
  C242  H242a  .  .  1.05(4)  ?
  C242  H242b  .  .  .88(5)  ?
  C242  H242c  .  .  1.13(6)  ?
  C243  H243a  .  .  1.18(5)  ?
  C243  H243b  .  .  .99(3)  ?
  C243  H243c  .  .  .91(8)  ?
  C244  H244a  .  .  1.10(5)  ?
  C244  H244b  .  .  .97(4)  ?
  C244  H244c  .  .  1.10(5)  ?
  C25  C26  .  .  1.391(3)  ?
  C25  H25  .  .  .94(3)  ?
  C26  S2  .  .  1.784(2)  ?
  O31  C31  .  .  1.357(3)  ?
  O31  H31a  .  .  .67(6)  ?
  O31  H31b  .  .  .88(5)  ?
  C31  C32  .  .  1.405(3)  ?
  C31  C36  .  .  1.395(3)  ?
  C32  C33  .  .  1.386(4)  ?
  C32  S4  .  .  1.782(2)  ?
  C33  C34  .  .  1.399(4)  ?
  C33  H33  .  .  .96(3)  ?
  C34  C341  .  .  1.537(4)  ?
  C34  C35  .  .  1.394(4)  ?
  C341  C342  .  .  1.552(5)  ?
  C341  C343  .  .  1.516(5)  ?
  C341  C344  .  .  1.522(4)  ?
  C342  H342a  .  .  .97(5)  ?
  C342  H342b  .  .  1.08(5)  ?
  C342  H342c  .  .  1.07(5)  ?
  C343  H343a  .  .  1.03(6)  ?
  C343  H343b  .  .  1.00(2)  ?
  C343  H343c  .  .  1.14(5)  ?
  C344  H344a  .  .  .98(4)  ?
  C344  H344b  .  .  1.04(3)  ?
  C344  H344c  .  .  1.03(3)  ?
  C35  C36  .  .  1.397(4)  ?
  C35  H35  .  .  .93(3)  ?
  C36  S3  .  .  1.789(2)  ?
  O41  C41  .  .  1.363(3)  ?
  O41  H41a  .  .  .65(6)  ?
  O41  H41b  .  .  .88(14)  ?
  C41  C42  .  .  1.397(3)  ?
  C41  C46  .  .  1.401(4)  ?
  C42  C43  .  .  1.394(3)  ?
  C43  C44  .  .  1.394(4)  ?
  C43  H43  .  .  .91(2)  ?
  C44  C441  .  .  1.541(4)  ?
  C44  C45  .  .  1.399(3)  ?
  C441  C442  .  .  1.597(17)  ?
  C441  C442'  .  .  1.500(14)  ?
  C441  C443  .  .  1.63(2)  ?
  C441  C443'  .  .  1.41(2)  ?
  C441  C444  .  .  1.44(2)  ?
  C441  C444'  .  .  1.60(2)  ?
  C442  C442'  .  .  .76(3)  ?
  C442  C443'  .  .  2.14(3)  ?
  C442  H442a  .  .  .97(8)  ?
  C442  H442b  .  .  .97(9)  ?
  C442  H442c  .  .  1.00(6)  ?
  C442  H442'a  .  .  1.32(7)  ?
  C442  H442'b  .  .  .72(7)  ?
  C442'  C444  .  .  2.01(2)  ?
  C442'  H442a  .  .  1.27(7)  ?
  C442'  H442c  .  .  .73(7)  ?
  C442'  H442'a  .  .  1.08(6)  ?
  C442'  H442'b  .  .  1.17(8)  ?
  C442'  H442'c  .  .  .97(5)  ?
  C443  C443'  .  .  .41(3)  ?
  C443  H443a  .  .  1.03(9)  ?
  C443  H443b  .  .  .88(6)  ?
  C443  H443c  .  .  1.08(9)  ?
  C443  H443'a  .  .  1.17(8)  ?
  C443  H443'b  .  .  .69(6)  ?
  C443  H443'c  .  .  1.34(13)  ?
  C443'  H443a  .  .  1.00(9)  ?
  C443'  H443b  .  .  1.22(6)  ?
  C443'  H443c  .  .  1.11(9)  ?
  C443'  H443'a  .  .  .97(9)  ?
  C443'  H443'b  .  .  1.08(6)  ?
  C443'  H443'c  .  .  1.12(14)  ?
  C444  C444'  .  .  .55(2)  ?
  C444  H444a  .  .  1.02(9)  ?
  C444  H444b  .  .  1.01(8)  ?
  C444  H444c  .  .  1.40(13)  ?
  C444  H444'a  .  .  1.09(7)  ?
  C444  H444'b  .  .  .94(6)  ?
  C444  H444'c  .  .  1.42(7)  ?
  C444'  H444a  .  .  1.34(9)  ?
  C444'  H444b  .  .  1.43(8)  ?
  C444'  H444c  .  .  1.05(12)  ?
  C444'  H444'a  .  .  1.08(7)  ?
  C444'  H444'b  .  .  .97(7)  ?
  C444'  H444'c  .  .  .87(6)  ?
  C45  C46  .  .  1.390(3)  ?
  C45  H45  .  .  .90(3)  ?
  C46  S4  .  .  1.783(2)  ?
  H443a  H443'a  .  .  .52(10)  ?
  H443b  H443'b  .  .  .75(8)  ?
  H443c  H443'c  .  .  .77(14)  ?
  H442a  H442'a  .  .  .84(10)  ?
  H442b  H442'b  .  .  .92(11)  ?
  H442c  H442'b  .  .  .86(11)  ?
  H442c  H442'c  .  .  .93(10)  ?
  H444a  H444'a  .  .  .72(11)  ?
  H444b  H444'b  .  .  .93(12)  ?
  H444c  H444'b  .  .  .87(16)  ?
 
loop_
_geom_angle_atom_site_label_1
_geom_angle_atom_site_label_2
_geom_angle_atom_site_label_3
_geom_angle_site_symmetry_1
_geom_angle_site_symmetry_2
_geom_angle_site_symmetry_3
_geom_angle
_geom_angle_publ_flag                #<< enter YES for value to be published
  C11  O11  H11a  .  .  .  114(3)  ?
  C11  O11  H11b  .  .  .  113(4)  ?
  H11a  O11  H11b  .  .  .  117(5)  ?
  O11  C11  C12  .  .  .  120.67(19)  ?
  O11  C11  C16  .  .  .  120.2(2)  ?
  C12  C11  C16  .  .  .  119.10(18)  ?
  C11  C12  C13  .  .  .  119.8(2)  ?
  C11  C12  S2  .  .  .  120.25(15)  ?
  C13  C12  S2  .  .  .  119.80(18)  ?
  C12  C13  C14  .  .  .  121.9(2)  ?
  C12  C13  H13  .  .  .  118.0(14)  ?
  C14  C13  H13  .  .  .  120.1(14)  ?
  C13  C14  C141  .  .  .  119.9(2)  ?
  C13  C14  C15  .  .  .  117.2(2)  ?
  C141  C14  C15  .  .  .  122.9(2)  ?
  C14  C141  C142  .  .  .  109.5(2)  ?
  C14  C141  C143  .  .  .  108.76(19)  ?
  C14  C141  C144  .  .  .  111.8(2)  ?
  C142  C141  C143  .  .  .  109.8(2)  ?
  C142  C141  C144  .  .  .  108.3(2)  ?
  C143  C141  C144  .  .  .  108.7(2)  ?
  C141  C142  H142a  .  .  .  112(2)  ?
  C141  C142  H142b  .  .  .  111.5(18)  ?
  C141  C142  H142c  .  .  .  106(2)  ?
  H142a  C142  H142b  .  .  .  107(2)  ?
  H142a  C142  H142c  .  .  .  107(2)  ?
  H142b  C142  H142c  .  .  .  113(3)  ?
  C141  C143  H143a  .  .  .  111.9(18)  ?
  C141  C143  H143b  .  .  .  106.7(18)  ?
  C141  C143  H143c  .  .  .  114(2)  ?
  H143a  C143  H143b  .  .  .  106(3)  ?
  H143a  C143  H143c  .  .  .  104(2)  ?
  H143b  C143  H143c  .  .  .  114(2)  ?
  C141  C144  H144a  .  .  .  111(2)  ?
  C141  C144  H144b  .  .  .  114.8(17)  ?
  C141  C144  H144c  .  .  .  111.9(16)  ?
  H144a  C144  H144b  .  .  .  103(3)  ?
  H144a  C144  H144c  .  .  .  110(3)  ?
  H144b  C144  H144c  .  .  .  106(3)  ?
  C14  C15  C16  .  .  .  122.5(2)  ?
  C14  C15  H15  .  .  .  120.8(13)  ?
  C16  C15  H15  .  .  .  116.7(13)  ?
  C11  C16  C15  .  .  .  119.5(2)  ?
  C11  C16  S1  .  .  .  120.62(16)  ?
  C15  C16  S1  .  .  .  119.63(16)  ?
  C16  S1  C42  .  .  .  103.69(11)  ?
  C21  O21  H21a  .  .  .  114(4)  ?
  C21  O21  H21b  .  .  .  122(4)  ?
  H21a  O21  H21b  .  .  .  109(6)  ?
  O21  C21  C22  .  .  .  120.4(2)  ?
  O21  C21  C26  .  .  .  120.6(2)  ?
  C22  C21  C26  .  .  .  119.1(2)  ?
  C21  C22  C23  .  .  .  119.2(2)  ?
  C21  C22  S3  .  .  .  120.72(17)  ?
  C23  C22  S3  .  .  .  119.62(18)  ?
  C22  C23  C24  .  .  .  122.9(2)  ?
  C22  C23  H23  .  .  .  115.2(14)  ?
  C24  C23  H23  .  .  .  121.7(14)  ?
  C23  C24  C241  .  .  .  120.9(2)  ?
  C23  C24  C25  .  .  .  116.5(2)  ?
  C241  C24  C25  .  .  .  122.5(2)  ?
  C24  C241  C242  .  .  .  110.5(2)  ?
  C24  C241  C243  .  .  .  108.3(2)  ?
  C24  C241  C244  .  .  .  112.6(3)  ?
  C242  C241  C243  .  .  .  107.5(3)  ?
  C242  C241  C244  .  .  .  107.9(3)  ?
  C243  C241  C244  .  .  .  110.0(3)  ?
  C241  C242  H242a  .  .  .  110.3(17)  ?
  C241  C242  H242b  .  .  .  109(3)  ?
  C241  C242  H242c  .  .  .  106(2)  ?
  H242a  C242  H242b  .  .  .  100(4)  ?
  H242a  C242  H242c  .  .  .  108(3)  ?
  H242b  C242  H242c  .  .  .  123(4)  ?
  C241  C243  H243a  .  .  .  107(2)  ?
  C241  C243  H243b  .  .  .  100(2)  ?
  C241  C243  H243c  .  .  .  110(5)  ?
  H243a  C243  H243b  .  .  .  98(3)  ?
  H243a  C243  H243c  .  .  .  113(6)  ?
  H243b  C243  H243c  .  .  .  127(5)  ?
  C241  C244  H244a  .  .  .  114(2)  ?
  C241  C244  H244b  .  .  .  103.6(18)  ?
  C241  C244  H244c  .  .  .  113(3)  ?
  H244a  C244  H244b  .  .  .  97(3)  ?
  H244a  C244  H244c  .  .  .  107(3)  ?
  H244b  C244  H244c  .  .  .  121(4)  ?
  C24  C25  C26  .  .  .  122.1(2)  ?
  C24  C25  H25  .  .  .  119.8(18)  ?
  C26  C25  H25  .  .  .  118.1(18)  ?
  C21  C26  C25  .  .  .  120.1(2)  ?
  C21  C26  S2  .  .  .  120.01(18)  ?
  C25  C26  S2  .  .  .  119.67(17)  ?
  C12  S2  C26  .  .  .  103.30(11)  ?
  C31  O31  H31a  .  .  .  116(5)  ?
  C31  O31  H31b  .  .  .  111(4)  ?
  H31a  O31  H31b  .  .  .  128(6)  ?
  O31  C31  C32  .  .  .  119.4(2)  ?
  O31  C31  C36  .  .  .  121.5(2)  ?
  C32  C31  C36  .  .  .  119.1(2)  ?
  C31  C32  C33  .  .  .  120.1(2)  ?
  C31  C32  S4  .  .  .  120.3(2)  ?
  C33  C32  S4  .  .  .  119.49(18)  ?
  C32  C33  C34  .  .  .  121.9(2)  ?
  C32  C33  H33  .  .  .  115.4(18)  ?
  C34  C33  H33  .  .  .  122.6(18)  ?
  C33  C34  C341  .  .  .  120.0(2)  ?
  C33  C34  C35  .  .  .  116.9(3)  ?
  C341  C34  C35  .  .  .  123.0(2)  ?
  C34  C341  C342  .  .  .  106.9(3)  ?
  C34  C341  C343  .  .  .  110.6(3)  ?
  C34  C341  C344  .  .  .  112.5(3)  ?
  C342  C341  C343  .  .  .  107.9(3)  ?
  C342  C341  C344  .  .  .  107.6(2)  ?
  C343  C341  C344  .  .  .  111.2(3)  ?
  C341  C342  H342a  .  .  .  111(2)  ?
  C341  C342  H342b  .  .  .  114(2)  ?
  C341  C342  H342c  .  .  .  111(3)  ?
  H342a  C342  H342b  .  .  .  100(4)  ?
  H342a  C342  H342c  .  .  .  112(4)  ?
  H342b  C342  H342c  .  .  .  108(4)  ?
  C341  C343  H343a  .  .  .  107(2)  ?
  C341  C343  H343b  .  .  .  101.1(15)  ?
  C341  C343  H343c  .  .  .  111(2)  ?
  H343a  C343  H343b  .  .  .  111(3)  ?
  H343a  C343  H343c  .  .  .  101(4)  ?
  H343b  C343  H343c  .  .  .  126(2)  ?
  C341  C344  H344a  .  .  .  107(2)  ?
  C341  C344  H344b  .  .  .  111.0(19)  ?
  C341  C344  H344c  .  .  .  108(2)  ?
  H344a  C344  H344b  .  .  .  113(3)  ?
  H344a  C344  H344c  .  .  .  107(3)  ?
  H344b  C344  H344c  .  .  .  111(3)  ?
  C34  C35  C36  .  .  .  122.4(2)  ?
  C34  C35  H35  .  .  .  121.0(18)  ?
  C36  C35  H35  .  .  .  116.5(18)  ?
  C31  C36  C35  .  .  .  119.4(2)  ?
  C31  C36  S3  .  .  .  121.3(2)  ?
  C35  C36  S3  .  .  .  118.76(17)  ?
  C22  S3  C36  .  .  .  106.73(10)  ?
  C41  O41  H41a  .  .  .  108(6)  ?
  C41  O41  H41b  .  .  .  102(8)  ?
  H41a  O41  H41b  .  .  .  150(9)  ?
  O41  C41  C42  .  .  .  120.5(2)  ?
  O41  C41  C46  .  .  .  120.48(19)  ?
  C42  C41  C46  .  .  .  119.0(2)  ?
  S1  C42  C41  .  .  .  119.16(19)  ?
  S1  C42  C43  .  .  .  120.66(16)  ?
  C41  C42  C43  .  .  .  120.0(2)  ?
  C42  C43  C44  .  .  .  122.2(2)  ?
  C42  C43  H43  .  .  .  118.0(19)  ?
  C44  C43  H43  .  .  .  119.8(19)  ?
  C43  C44  C441  .  .  .  122.6(2)  ?
  C43  C44  C45  .  .  .  116.6(2)  ?
  C441  C44  C45  .  .  .  120.8(2)  ?
  C44  C441  C442  .  .  .  106.9(7)  ?
  C44  C441  C442'  .  .  .  109.0(6)  ?
  C44  C441  C443  .  .  .  107.6(10)  ?
  C44  C441  C443'  .  .  .  116.3(12)  ?
  C44  C441  C444  .  .  .  115.5(7)  ?
  C44  C441  C444'  .  .  .  106.6(6)  ?
  C442  C441  C442'  .  .  .  28.3(10)  ?
  C442  C441  C443  .  .  .  102.7(10)  ?
  C442  C441  C443'  .  .  .  90.4(11)  ?
  C442  C441  C444  .  .  .  111.4(12)  ?
  C442  C441  C444'  .  .  .  130.9(11)  ?
  C442'  C441  C443  .  .  .  125.8(9)  ?
  C442'  C441  C443'  .  .  .  112.8(9)  ?
  C442'  C441  C444  .  .  .  86.1(9)  ?
  C442'  C441  C444'  .  .  .  105.9(8)  ?
  C443  C441  C443'  .  .  .  13.1(11)  ?
  C443  C441  C444  .  .  .  111.9(13)  ?
  C443  C441  C444'  .  .  .  100.2(11)  ?
  C443'  C441  C444  .  .  .  113.3(14)  ?
  C443'  C441  C444'  .  .  .  105.6(12)  ?
  C444  C441  C444'  .  .  .  19.8(9)  ?
  C441  C442  C442'  .  .  .  68.8(16)  ?
  C441  C442  C443'  .  .  .  41.3(7)  ?
  C441  C442  H442a  .  .  .  107(4)  ?
  C441  C442  H442b  .  .  .  108(5)  ?
  C441  C442  H442c  .  .  .  102(4)  ?
  C441  C442  H442'a  .  .  .  93(3)  ?
  C441  C442  H442'b  .  .  .  135(5)  ?
  C442'  C442  C443'  .  .  .  103(2)  ?
  C442'  C442  H442a  .  .  .  94(5)  ?
  C442'  C442  H442b  .  .  .  161(5)  ?
  C442'  C442  H442c  .  .  .  46(5)  ?
  C442'  C442  H442'a  .  .  .  55(3)  ?
  C442'  C442  H442'b  .  .  .  104(6)  ?
  C443'  C442  H442a  .  .  .  82(4)  ?
  C443'  C442  H442b  .  .  .  84(5)  ?
  C443'  C442  H442c  .  .  .  143(4)  ?
  C443'  C442  H442'a  .  .  .  94(2)  ?
  C443'  C442  H442'b  .  .  .  145(7)  ?
  H442a  C442  H442b  .  .  .  106(7)  ?
  H442a  C442  H442c  .  .  .  115(6)  ?
  H442a  C442  H442'a  .  .  .  39(5)  ?
  H442a  C442  H442'b  .  .  .  118(7)  ?
  H442b  C442  H442c  .  .  .  119(7)  ?
  H442b  C442  H442'a  .  .  .  144(5)  ?
  H442b  C442  H442'b  .  .  .  64(8)  ?
  H442c  C442  H442'a  .  .  .  83(5)  ?
  H442c  C442  H442'b  .  .  .  58(7)  ?
  H442'a  C442  H442'b  .  .  .  119(7)  ?
  C441  C442'  C442  .  .  .  82.9(16)  ?
  C441  C442'  C444  .  .  .  45.7(7)  ?
  C441  C442'  H442a  .  .  .  98(3)  ?
  C441  C442'  H442c  .  .  .  131(6)  ?
  C441  C442'  H442'a  .  .  .  110(3)  ?
  C441  C442'  H442'b  .  .  .  108(4)  ?
  C441  C442'  H442'c  .  .  .  114(3)  ?
  C442  C442'  C444  .  .  .  123.6(18)  ?
  C442  C442'  H442a  .  .  .  50(4)  ?
  C442  C442'  H442c  .  .  .  84(6)  ?
  C442  C442'  H442'a  .  .  .  90(3)  ?
  C442  C442'  H442'b  .  .  .  37(3)  ?
  C442  C442'  H442'c  .  .  .  149(4)  ?
  C444  C442'  H442a  .  .  .  107(4)  ?
  C444  C442'  H442c  .  .  .  143(5)  ?
  C444  C442'  H442'a  .  .  .  88(3)  ?
  C444  C442'  H442'b  .  .  .  154(4)  ?
  C444  C442'  H442'c  .  .  .  84(4)  ?
  H442a  C442'  H442c  .  .  .  109(6)  ?
  H442a  C442'  H442'a  .  .  .  41(5)  ?
  H442a  C442'  H442'b  .  .  .  73(5)  ?
  H442a  C442'  H442'c  .  .  .  142(5)  ?
  H442c  C442'  H442'a  .  .  .  118(6)  ?
  H442c  C442'  H442'b  .  .  .  47(7)  ?
  H442c  C442'  H442'c  .  .  .  65(7)  ?
  H442'a  C442'  H442'b  .  .  .  106(4)  ?
  H442'a  C442'  H442'c  .  .  .  106(5)  ?
  H442'b  C442'  H442'c  .  .  .  112(5)  ?
  C441  C443  C443'  .  .  .  52(4)  ?
  C441  C443  H443a  .  .  .  113(5)  ?
  C441  C443  H443b  .  .  .  98(3)  ?
  C441  C443  H443c  .  .  .  110(4)  ?
  C441  C443  H443'a  .  .  .  87(3)  ?
  C441  C443  H443'b  .  .  .  133(4)  ?
  C441  C443  H443'c  .  .  .  79(5)  ?
  C443'  C443  H443a  .  .  .  74(7)  ?
  C443'  C443  H443b  .  .  .  141(7)  ?
  C443'  C443  H443c  .  .  .  84(7)  ?
  C443'  C443  H443'a  .  .  .  50(6)  ?
  C443'  C443  H443'b  .  .  .  162(9)  ?
  C443'  C443  H443'c  .  .  .  50(8)  ?
  H443a  C443  H443b  .  .  .  104(6)  ?
  H443a  C443  H443c  .  .  .  98(6)  ?
  H443a  C443  H443'a  .  .  .  26(5)  ?
  H443a  C443  H443'b  .  .  .  111(6)  ?
  H443a  C443  H443'c  .  .  .  95(7)  ?
  H443b  C443  H443c  .  .  .  134(6)  ?
  H443b  C443  H443'a  .  .  .  114(6)  ?
  H443b  C443  H443'b  .  .  .  56(6)  ?
  H443b  C443  H443'c  .  .  .  160(7)  ?
  H443c  C443  H443'a  .  .  .  104(6)  ?
  H443c  C443  H443'b  .  .  .  79(7)  ?
  H443c  C443  H443'c  .  .  .  35(7)  ?
  H443'a  C443  H443'b  .  .  .  137(6)  ?
  H443'a  C443  H443'c  .  .  .  86(7)  ?
  H443'b  C443  H443'c  .  .  .  112(8)  ?
  C441  C443'  C442  .  .  .  48.2(8)  ?
  C441  C443'  C443  .  .  .  115(5)  ?
  C441  C443'  H443a  .  .  .  136(5)  ?
  C441  C443'  H443b  .  .  .  95(2)  ?
  C441  C443'  H443c  .  .  .  124(4)  ?
  C441  C443'  H443'a  .  .  .  110(4)  ?
  C441  C443'  H443'b  .  .  .  119(3)  ?
  C441  C443'  H443'c  .  .  .  97(5)  ?
  C442  C443'  C443  .  .  .  156(6)  ?
  C442  C443'  H443a  .  .  .  121(5)  ?
  C442  C443'  H443b  .  .  .  144(3)  ?
  C442  C443'  H443c  .  .  .  100(4)  ?
  C442  C443'  H443'a  .  .  .  92(4)  ?
  C442  C443'  H443'b  .  .  .  151(4)  ?
  C442  C443'  H443'c  .  .  .  60(6)  ?
  C443  C443'  H443a  .  .  .  83(7)  ?
  C443  C443'  H443b  .  .  .  27(5)  ?
  C443  C443'  H443c  .  .  .  75(7)  ?
  C443  C443'  H443'a  .  .  .  111(7)  ?
  C443  C443'  H443'b  .  .  .  11(6)  ?
  C443  C443'  H443'c  .  .  .  114(9)  ?
  H443a  C443'  H443b  .  .  .  84(5)  ?
  H443a  C443'  H443c  .  .  .  98(6)  ?
  H443a  C443'  H443'a  .  .  .  31(6)  ?
  H443a  C443'  H443'b  .  .  .  86(6)  ?
  H443a  C443'  H443'c  .  .  .  112(7)  ?
  H443b  C443'  H443c  .  .  .  101(5)  ?
  H443b  C443'  H443'a  .  .  .  103(5)  ?
  H443b  C443'  H443'b  .  .  .  37(4)  ?
  H443b  C443'  H443'c  .  .  .  138(7)  ?
  H443c  C443'  H443'a  .  .  .  117(6)  ?
  H443c  C443'  H443'b  .  .  .  64(5)  ?
  H443c  C443'  H443'c  .  .  .  40(7)  ?
  H443'a  C443'  H443'b  .  .  .  116(5)  ?
  H443'a  C443'  H443'c  .  .  .  110(7)  ?
  H443'b  C443'  H443'c  .  .  .  103(7)  ?
  C441  C444  C442'  .  .  .  48.2(7)  ?
  C441  C444  C444'  .  .  .  97(3)  ?
  C441  C444  H444a  .  .  .  112(5)  ?
  C441  C444  H444b  .  .  .  102(6)  ?
  C441  C444  H444c  .  .  .  125(6)  ?
  C441  C444  H444'a  .  .  .  122(3)  ?
  C441  C444  H444'b  .  .  .  128(5)  ?
  C441  C444  H444'c  .  .  .  96(3)  ?
  C442'  C444  C444'  .  .  .  145(4)  ?
  C442'  C444  H444a  .  .  .  87(5)  ?
  C442'  C444  H444b  .  .  .  66(5)  ?
  C442'  C444  H444c  .  .  .  152(5)  ?
  C442'  C444  H444'a  .  .  .  123(4)  ?
  C442'  C444  H444'b  .  .  .  120(5)  ?
  C442'  C444  H444'c  .  .  .  144(3)  ?
  C444'  C444  H444a  .  .  .  114(6)  ?
  C444'  C444  H444b  .  .  .  132(5)  ?
  C444'  C444  H444c  .  .  .  40(6)  ?
  C444'  C444  H444'a  .  .  .  74(5)  ?
  C444'  C444  H444'b  .  .  .  76(6)  ?
  C444'  C444  H444'c  .  .  .  4(3)  ?
  H444a  C444  H444b  .  .  .  99(7)  ?
  H444a  C444  H444c  .  .  .  116(8)  ?
  H444a  C444  H444'a  .  .  .  40(6)  ?
  H444a  C444  H444'b  .  .  .  118(7)  ?
  H444a  C444  H444'c  .  .  .  111(6)  ?
  H444b  C444  H444c  .  .  .  94(7)  ?
  H444b  C444  H444'a  .  .  .  127(7)  ?
  H444b  C444  H444'b  .  .  .  57(7)  ?
  H444b  C444  H444'c  .  .  .  136(5)  ?
  H444c  C444  H444'a  .  .  .  84(6)  ?
  H444c  C444  H444'b  .  .  .  37(7)  ?
  H444c  C444  H444'c  .  .  .  44(6)  ?
  H444'a  C444  H444'b  .  .  .  106(6)  ?
  H444'a  C444  H444'c  .  .  .  71(4)  ?
  H444'b  C444  H444'c  .  .  .  80(6)  ?
  C441  C444'  C444  .  .  .  63(3)  ?
  C441  C444'  H444a  .  .  .  88(4)  ?
  C441  C444'  H444b  .  .  .  79(4)  ?
  C441  C444'  H444c  .  .  .  144(8)  ?
  C441  C444'  H444'a  .  .  .  110(4)  ?
  C441  C444'  H444'b  .  .  .  111(5)  ?
  C441  C444'  H444'c  .  .  .  114(5)  ?
  C444  C444'  H444a  .  .  .  44(5)  ?
  C444  C444'  H444b  .  .  .  32(4)  ?
  C444  C444'  H444c  .  .  .  120(8)  ?
  C444  C444'  H444'a  .  .  .  77(5)  ?
  C444  C444'  H444'b  .  .  .  71(5)  ?
  C444  C444'  H444'c  .  .  .  173(4)  ?
  H444a  C444'  H444b  .  .  .  68(5)  ?
  H444a  C444'  H444c  .  .  .  119(9)  ?
  H444a  C444'  H444'a  .  .  .  32(5)  ?
  H444a  C444'  H444'b  .  .  .  92(6)  ?
  H444a  C444'  H444'c  .  .  .  131(6)  ?
  H444b  C444'  H444c  .  .  .  91(8)  ?
  H444b  C444'  H444'a  .  .  .  96(5)  ?
  H444b  C444'  H444'b  .  .  .  40(6)  ?
  H444b  C444'  H444'c  .  .  .  155(5)  ?
  H444c  C444'  H444'a  .  .  .  105(9)  ?
  H444c  C444'  H444'b  .  .  .  51(9)  ?
  H444c  C444'  H444'c  .  .  .  66(8)  ?
  H444'a  C444'  H444'b  .  .  .  105(6)  ?
  H444'a  C444'  H444'c  .  .  .  99(6)  ?
  H444'b  C444'  H444'c  .  .  .  116(6)  ?
  C44  C45  C46  .  .  .  122.6(2)  ?
  C44  C45  H45  .  .  .  120.9(16)  ?
  C46  C45  H45  .  .  .  116.5(16)  ?
  C41  C46  C45  .  .  .  119.5(2)  ?
  C41  C46  S4  .  .  .  119.63(17)  ?
  C45  C46  S4  .  .  .  120.7(2)  ?
  C32  S4  C46  .  .  .  102.73(10)  ?
  C443  H443a  C443'  .  .  .  23(3)  ?
  C443  H443a  H443'a  .  .  .  92(13)  ?
  C443'  H443a  H443'a  .  .  .  71(12)  ?
  C443  H443b  C443'  .  .  .  12(2)  ?
  C443  H443b  H443'b  .  .  .  49(6)  ?
  C443'  H443b  H443'b  .  .  .  61(6)  ?
  C443  H443c  C443'  .  .  .  21(2)  ?
  C443  H443c  H443'c  .  .  .  91(13)  ?
  C443'  H443c  H443'c  .  .  .  71(12)  ?
  C443  H443'a  C443'  .  .  .  19(2)  ?
  C443  H443'a  H443a  .  .  .  61(12)  ?
  C443'  H443'a  H443a  .  .  .  78(13)  ?
  C443  H443'b  C443'  .  .  .  7(3)  ?
  C443  H443'b  H443b  .  .  .  75(7)  ?
  C443'  H443'b  H443b  .  .  .  81(7)  ?
  C443  H443'c  C443'  .  .  .  16(2)  ?
  C443  H443'c  H443c  .  .  .  54(*)  ?
  C443'  H443'c  H443c  .  .  .  69(11)  ?
  C442  H442a  C442'  .  .  .  37(3)  ?
  C442  H442a  H442'a  .  .  .  94(7)  ?
  C442'  H442a  H442'a  .  .  .  57(5)  ?
  C442  H442b  H442'b  .  .  .  45(6)  ?
  C442  H442c  C442'  .  .  .  49(4)  ?
  C442  H442c  H442'b  .  .  .  45(6)  ?
  C442  H442c  H442'c  .  .  .  120(8)  ?
  C442'  H442c  H442'b  .  .  .  94(8)  ?
  C442'  H442c  H442'c  .  .  .  71(7)  ?
  H442'b  H442c  H442'c  .  .  .  165(*)  ?
  C442  H442'a  C442'  .  .  .  35(2)  ?
  C442  H442'a  H442a  .  .  .  47(6)  ?
  C442'  H442'a  H442a  .  .  .  82(7)  ?
  C442  H442'b  C442'  .  .  .  39(5)  ?
  C442  H442'b  H442b  .  .  .  71(8)  ?
  C442  H442'b  H442c  .  .  .  78(9)  ?
  C442'  H442'b  H442b  .  .  .  109(8)  ?
  C442'  H442'b  H442c  .  .  .  38(5)  ?
  H442b  H442'b  H442c  .  .  .  144(11)  ?
  C442'  H442'c  H442c  .  .  .  45(5)  ?
  C444  H444a  C444'  .  .  .  22(2)  ?
  C444  H444a  H444'a  .  .  .  75(9)  ?
  C444'  H444a  H444'a  .  .  .  53(8)  ?
  C444  H444b  C444'  .  .  .  17(2)  ?
  C444  H444b  H444'b  .  .  .  58(6)  ?
  C444'  H444b  H444'b  .  .  .  42(5)  ?
  C444  H444c  C444'  .  .  .  20(3)  ?
  C444  H444c  H444'b  .  .  .  41(7)  ?
  C444'  H444c  H444'b  .  .  .  60(9)  ?
  C444  H444'a  C444'  .  .  .  29(2)  ?
  C444  H444'a  H444a  .  .  .  65(9)  ?
  C444'  H444'a  H444a  .  .  .  94(10)  ?
  C444  H444'b  C444'  .  .  .  33(2)  ?
  C444  H444'b  H444b  .  .  .  65(7)  ?
  C444  H444'b  H444c  .  .  .  102(10)  ?
  C444'  H444'b  H444b  .  .  .  98(8)  ?
  C444'  H444'b  H444c  .  .  .  69(9)  ?
  H444b  H444'b  H444c  .  .  .  167(11)  ?
  C444  H444'c  C444'  .  .  .  2.6(17)  ?
 
loop_
_geom_torsion_atom_site_label_1
_geom_torsion_atom_site_label_2
_geom_torsion_atom_site_label_3
_geom_torsion_atom_site_label_4
_geom_torsion_site_symmetry_1
_geom_torsion_site_symmetry_2
_geom_torsion_site_symmetry_3
_geom_torsion_site_symmetry_4
_geom_torsion
_geom_torsion_publ_flag              #<< enter YES for value to be published
     ?  ?  ?  ?  ?  ?  ?  ?  ?  ?
 
loop_
_geom_hbond_atom_site_label_D
_geom_hbond_atom_site_label_H
_geom_hbond_atom_site_label_A
_geom_hbond_site_symmetry_D
_geom_hbond_site_symmetry_H
_geom_hbond_site_symmetry_A
_geom_hbond_distance_DH
_geom_hbond_distance_HA
_geom_hbond_distance_DA
_geom_hbond_angle_DHA
_geom_hbond_publ_flag               #<< enter YES for value to be published
      ?  ?  ?  ?  ?  ?  ?  ?  ?  ?  ?
 
 
#--------------------------------------------------------------------------
#      Special items requested by author for inclusion in paper
#--------------------------------------------------------------------------
 
loop_
_publ_manuscript_incl_extra_item
_publ_manuscript_incl_extra_defn
                       ?  ?
 
#--------------------------------------------------------------------------
#       Items which are non-mandatory for Acta C submissions
#--------------------------------------------------------------------------
 
loop_
_geom_contact_atom_site_label_1
_geom_contact_atom_site_label_2
_geom_contact_distance
_geom_contact_site_symmetry_1
_geom_contact_site_symmetry_2
_geom_contact_publ_flag
  O11  C12  2.398(3)  .  .  ?
  O11  C13  3.659(3)  .  .  ?
  O11  C15  3.658(3)  .  .  ?
  O11  C16  2.396(3)  .  .  ?
  O11  S1  3.015(2)  .  .  ?
  O11  O21  2.759(3)  .  .  ?
  O11  C21  3.580(3)  .  .  ?
  O11  S2  3.018(2)  .  .  ?
  O11  O31  3.855(3)  .  .  ?
  O11  O41  2.749(3)  .  .  ?
  O11  C41  3.546(3)  .  .  ?
  O11  C42  3.677(3)  .  .  ?
  O11  H242c  3.18(5)  .  '3 657'  ?
  O11  H443a  3.33(8)  .  '1 655'  ?
  O11  H443b  3.18(5)  .  '1 655'  ?
  O11  H21a  2.03(5)  .  .  ?
  O11  H21b  2.97(6)  .  .  ?
  O11  H41a  3.00(6)  .  .  ?
  O11  H41b  2.49(13)  .  .  ?
  C11  C13  2.414(3)  .  .  ?
  C11  C14  2.826(3)  .  .  ?
  C11  C15  2.415(3)  .  .  ?
  C11  S1  2.769(2)  .  .  ?
  C11  O21  3.509(3)  .  .  ?
  C11  S2  2.771(2)  .  .  ?
  C11  O41  3.548(3)  .  .  ?
  C11  H11a  2.15(6)  .  .  ?
  C11  H11b  1.72(4)  .  .  ?
  C12  C14  2.442(3)  .  .  ?
  C12  C15  2.770(3)  .  .  ?
  C12  C16  2.418(3)  .  .  ?
  C12  O21  3.627(3)  .  .  ?
  C12  C26  2.800(3)  .  .  ?
  C12  H13  2.00(2)  .  .  ?
  C12  H11b  2.43(4)  .  .  ?
  C13  C141  2.550(3)  .  .  ?
  C13  C15  2.378(3)  .  .  ?
  C13  C16  2.774(3)  .  .  ?
  C13  S2  2.755(2)  .  .  ?
  C14  C142  2.511(4)  .  .  ?
  C14  C143  2.500(4)  .  .  ?
  C14  C144  2.539(3)  .  .  ?
  C14  C16  2.432(3)  .  .  ?
  C14  H13  2.03(3)  .  .  ?
  C14  H142c  2.68(3)  .  .  ?
  C14  H15  2.09(2)  .  .  ?
  C141  C15  2.568(3)  .  .  ?
  C141  H13  2.69(2)  .  .  ?
  C141  H142a  2.14(3)  .  .  ?
  C141  H142b  2.14(3)  .  .  ?
  C141  H142c  2.03(3)  .  .  ?
  C141  H143a  2.12(3)  .  .  ?
  C141  H143b  2.09(4)  .  .  ?
  C141  H143c  2.15(3)  .  .  ?
  C141  H144a  2.08(3)  .  .  ?
  C141  H144b  2.17(3)  .  .  ?
  C141  H144c  2.10(3)  .  .  ?
  C142  C143  2.509(5)  .  .  ?
  C142  C144  2.479(5)  .  .  ?
  C142  H143a  2.68(3)  .  .  ?
  C142  H144a  2.65(4)  .  .  ?
  C143  C144  2.485(4)  .  .  ?
  C144  C15  2.869(3)  .  .  ?
  C144  H142c  2.60(3)  .  .  ?
  C144  H143b  2.57(3)  .  .  ?
  C144  H15  2.50(2)  .  .  ?
  C15  S1  2.745(2)  .  .  ?
  C16  O41  3.655(3)  .  .  ?
  C16  C42  2.801(3)  .  .  ?
  C16  H15  2.05(2)  .  .  ?
  C16  H11a  2.59(5)  .  .  ?
  S1  O41  2.985(2)  .  .  ?
  S1  C41  2.752(2)  .  .  ?
  S1  C43  2.770(3)  .  .  ?
  S1  H11a  2.47(5)  .  .  ?
  S1  H41b  2.40(10)  .  .  ?
  O21  C22  2.397(3)  .  .  ?
  O21  C23  3.657(3)  .  .  ?
  O21  C24  3.447(3)  .  '3 657'  ?
  O21  C242  3.462(5)  .  '3 657'  ?
  O21  C25  3.605(3)  .  '3 657'  ?
  O21  C25  3.660(3)  .  .  ?
  O21  C26  2.394(3)  .  .  ?
  O21  S2  3.006(2)  .  .  ?
  O21  O31  2.668(3)  .  .  ?
  O21  C31  3.497(3)  .  .  ?
  O21  C36  3.648(3)  .  .  ?
  O21  S3  3.030(2)  .  .  ?
  O21  O41  3.885(3)  .  .  ?
  O21  H242c  2.49(6)  .  '3 657'  ?
  O21  H244b  3.36(3)  .  '3 657'  ?
  O21  H11a  3.27(6)  .  .  ?
  O21  H11b  2.16(5)  .  .  ?
  O21  H31a  2.05(6)  .  .  ?
  O21  H31b  3.16(6)  .  .  ?
  C21  C23  2.411(4)  .  .  ?
  C21  C24  2.836(3)  .  .  ?
  C21  C25  2.417(3)  .  .  ?
  C21  S2  2.763(2)  .  .  ?
  C21  O31  3.523(3)  .  .  ?
  C21  S3  2.782(2)  .  .  ?
  C21  H21a  1.83(6)  .  .  ?
  C21  H21b  1.98(6)  .  .  ?
  C22  C24  2.448(3)  .  .  ?
  C22  C25  2.778(3)  .  .  ?
  C22  C26  2.414(3)  .  .  ?
  C22  O31  3.678(3)  .  .  ?
  C22  C36  2.872(3)  .  .  ?
  C22  H23  2.00(3)  .  .  ?
  C22  H21b  2.62(6)  .  .  ?
  C23  C241  2.555(3)  .  .  ?
  C23  C25  2.376(3)  .  .  ?
  C23  C26  2.762(4)  .  .  ?
  C23  S3  2.758(2)  .  .  ?
  C24  C242  2.524(4)  .  .  ?
  C24  C243  2.497(6)  .  .  ?
  C24  C244  2.532(5)  .  .  ?
  C24  C26  2.441(3)  .  .  ?
  C24  H23  2.07(3)  .  .  ?
  C24  H243b  2.69(3)  .  .  ?
  C24  H243c  2.65(9)  .  .  ?
  C24  H25  2.04(3)  .  .  ?
  C241  C25  2.579(4)  .  .  ?
  C241  H242a  2.14(4)  .  .  ?
  C241  H242b  2.00(4)  .  .  ?
  C241  H242c  2.13(5)  .  .  ?
  C241  H243a  2.20(5)  .  .  ?
  C241  H243b  1.96(3)  .  .  ?
  C241  H243c  2.05(9)  .  .  ?
  C241  H244a  2.20(4)  .  .  ?
  C241  H244b  1.97(3)  .  .  ?
  C241  H244c  2.19(5)  .  .  ?
  C242  C243  2.475(5)  .  .  ?
  C242  C244  2.454(5)  .  .  ?
  C242  H243c  2.65(8)  .  .  ?
  C242  H244a  2.68(4)  .  .  ?
  C242  H244b  2.49(3)  .  .  ?
  C243  C244  2.492(8)  .  .  ?
  C243  H242a  2.68(3)  .  .  ?
  C243  H242b  2.55(4)  .  .  ?
  C244  C25  2.886(5)  .  .  ?
  C244  H242a  2.68(3)  .  .  ?
  C244  H242c  2.62(4)  .  .  ?
  C244  H243a  2.69(5)  .  .  ?
  C244  H243b  2.44(4)  .  .  ?
  C244  H25  2.53(3)  .  .  ?
  C25  S2  2.752(3)  .  .  ?
  C26  H25  2.02(3)  .  .  ?
  C26  H21a  2.46(5)  .  .  ?
  S2  H11b  2.68(5)  .  .  ?
  S2  H21a  2.59(5)  .  .  ?
  O31  C32  2.385(3)  .  .  ?
  O31  C33  3.648(4)  .  .  ?
  O31  C35  3.663(4)  .  .  ?
  O31  C36  2.402(3)  .  .  ?
  O31  S3  3.058(2)  .  .  ?
  O31  O41  2.771(3)  .  .  ?
  O31  C41  3.503(3)  .  .  ?
  O31  C444'  3.556(19)  .  '1 655'  ?
  O31  C46  3.599(3)  .  .  ?
  O31  S4  2.990(2)  .  .  ?
  O31  H444c  3.24(13)  .  '1 655'  ?
  O31  H444'a  3.05(7)  .  '1 655'  ?
  O31  H444'c  3.09(6)  .  '1 655'  ?
  O31  H21a  2.98(6)  .  .  ?
  O31  H21b  1.79(7)  .  .  ?
  O31  H41a  2.16(6)  .  .  ?
  C31  C33  2.418(4)  .  .  ?
  C31  C34  2.830(4)  .  .  ?
  C31  C35  2.411(4)  .  .  ?
  C31  S3  2.781(2)  .  .  ?
  C31  O41  3.601(3)  .  .  ?
  C31  S4  2.770(2)  .  .  ?
  C31  H31a  1.75(6)  .  .  ?
  C31  H31b  1.87(6)  .  .  ?
  C32  C34  2.435(4)  .  .  ?
  C32  C35  2.765(3)  .  .  ?
  C32  C36  2.415(3)  .  .  ?
  C32  C46  2.784(3)  .  .  ?
  C32  H33  2.00(3)  .  .  ?
  C32  H31b  2.41(6)  .  .  ?
  C33  C341  2.544(4)  .  .  ?
  C33  C343  2.977(6)  .  .  ?
  C33  C35  2.381(4)  .  .  ?
  C33  C36  2.779(4)  .  .  ?
  C33  S4  2.743(3)  .  .  ?
  C34  C342  2.483(5)  .  .  ?
  C34  C343  2.509(6)  .  .  ?
  C34  C344  2.543(5)  .  .  ?
  C34  C36  2.447(4)  .  .  ?
  C34  H33  2.08(3)  .  .  ?
  C34  H343b  2.67(3)  .  .  ?
  C34  H35  2.04(3)  .  .  ?
  C341  C35  2.577(4)  .  .  ?
  C341  H343a  2.06(5)  .  .  ?
  C341  H343b  1.97(2)  .  .  ?
  C341  H343c  2.19(5)  .  .  ?
  C341  H344a  2.04(4)  .  .  ?
  C341  H344b  2.13(3)  .  .  ?
  C341  H344c  2.08(3)  .  .  ?
  C341  H342a  2.11(4)  .  .  ?
  C341  H342b  2.23(5)  .  .  ?
  C341  H342c  2.18(5)  .  .  ?
  C342  C343  2.480(6)  .  .  ?
  C342  C344  2.480(5)  .  .  ?
  C342  H343a  2.62(5)  .  .  ?
  C342  H343c  2.66(4)  .  .  ?
  C342  H344a  2.69(4)  .  .  ?
  C342  H344b  2.66(3)  .  .  ?
  C343  C344  2.505(6)  .  .  ?
  C343  H344a  2.59(3)  .  .  ?
  C343  H342a  2.65(4)  .  .  ?
  C344  C35  2.896(5)  .  .  ?
  C344  H343a  2.67(5)  .  .  ?
  C344  H343b  2.55(2)  .  .  ?
  C344  H35  2.56(3)  .  .  ?
  C35  S3  2.749(3)  .  .  ?
  C36  H35  1.99(3)  .  .  ?
  C36  H31a  2.46(6)  .  .  ?
  S3  H23  2.77(2)  .  .  ?
  S3  H35  2.78(3)  .  .  ?
  S3  H21b  2.74(6)  .  .  ?
  S3  H31a  2.71(6)  .  .  ?
  O41  C42  2.396(3)  .  .  ?
  O41  C43  3.665(3)  .  .  ?
  O41  C443  3.51(3)  .  '1 655'  ?
  O41  C443'  3.53(3)  .  '1 655'  ?
  O41  C444  3.584(18)  .  '1 655'  ?
  O41  C444'  3.455(17)  .  '1 655'  ?
  O41  C45  3.661(4)  .  .  ?
  O41  C46  2.400(4)  .  .  ?
  O41  S4  3.000(3)  .  .  ?
  O41  H443a  2.76(9)  .  '1 655'  ?
  O41  H443b  3.31(5)  .  '1 655'  ?
  O41  H443'a  2.79(8)  .  '1 655'  ?
  O41  H444a  2.95(8)  .  '1 655'  ?
  O41  H444'a  2.58(6)  .  '1 655'  ?
  O41  H444'c  3.34(5)  .  '1 655'  ?
  O41  H11a  1.63(6)  .  .  ?
  O41  H11b  2.97(5)  .  .  ?
  O41  H21b  3.39(6)  .  .  ?
  O41  H31a  3.03(5)  .  .  ?
  O41  H31b  2.04(5)  .  .  ?
  C41  C43  2.417(3)  .  .  ?
  C41  C44  2.836(3)  .  .  ?
  C41  C45  2.411(4)  .  .  ?
  C41  S4  2.759(2)  .  .  ?
  C41  H11a  2.53(7)  .  .  ?
  C41  H41a  1.69(5)  .  .  ?
  C41  H41b  1.76(14)  .  .  ?
  C42  C44  2.441(4)  .  .  ?
  C42  C45  2.764(4)  .  .  ?
  C42  C46  2.411(3)  .  .  ?
  C42  H43  1.99(2)  .  .  ?
  C42  H41b  2.32(12)  .  .  ?
  C43  C441  2.575(4)  .  .  ?
  C43  C443  2.89(3)  .  .  ?
  C43  C443'  2.95(3)  .  .  ?
  C43  C45  2.376(3)  .  .  ?
  C43  C46  2.773(3)  .  .  ?
  C44  C442  2.520(15)  .  .  ?
  C44  C442'  2.476(15)  .  .  ?
  C44  C443  2.56(2)  .  .  ?
  C44  C443'  2.51(2)  .  .  ?
  C44  C444  2.52(2)  .  .  ?
  C44  C444'  2.52(2)  .  .  ?
  C44  C46  2.447(3)  .  .  ?
  C44  H43  2.01(3)  .  .  ?
  C44  H443b  2.67(5)  .  .  ?
  C44  H443'c  2.66(10)  .  .  ?
  C44  H442b  2.69(8)  .  .  ?
  C44  H442c  2.65(7)  .  .  ?
  C44  H444b  2.70(10)  .  .  ?
  C44  H45  2.02(3)  .  .  ?
  C441  C45  2.557(3)  .  .  ?
  C441  H443a  2.24(7)  .  .  ?
  C441  H443b  1.95(5)  .  .  ?
  C441  H443c  2.24(7)  .  .  ?
  C441  H443'a  1.96(7)  .  .  ?
  C441  H443'b  2.16(5)  .  .  ?
  C441  H443'c  1.91(12)  .  .  ?
  C441  H442a  2.09(7)  .  .  ?
  C441  H442b  2.11(9)  .  .  ?
  C441  H442c  2.05(6)  .  .  ?
  C441  H442'a  2.12(5)  .  .  ?
  C441  H442'b  2.17(7)  .  .  ?
  C441  H442'c  2.10(5)  .  .  ?
  C441  H444a  2.06(10)  .  .  ?
  C441  H444b  1.93(9)  .  .  ?
  C441  H444c  2.53(14)  .  .  ?
  C441  H444'a  2.22(7)  .  .  ?
  C441  H444'b  2.15(7)  .  .  ?
  C441  H444'c  2.12(6)  .  .  ?
  C442  C443  2.52(3)  .  .  ?
  C442  C444  2.51(3)  .  .  ?
  C442  C444'  2.91(3)  .  .  ?
  C442  H443c  2.58(8)  .  .  ?
  C442  H443'a  2.38(7)  .  .  ?
  C442  H443'c  1.86(12)  .  .  ?
  C442  H442'c  1.67(6)  .  .  ?
  C442  H444a  2.68(10)  .  .  ?
  C442  H444b  2.54(9)  .  .  ?
  C442'  C443  2.79(2)  .  .  ?
  C442'  C443'  2.43(2)  .  .  ?
  C442'  C444'  2.48(2)  .  .  ?
  C442'  H443'a  2.60(7)  .  .  ?
  C442'  H443'c  2.45(12)  .  .  ?
  C442'  H442b  1.71(9)  .  .  ?
  C442'  H444a  2.21(10)  .  .  ?
  C442'  H444b  1.84(9)  .  .  ?
  C442'  H444'b  2.61(8)  .  .  ?
  C443  C444  2.55(3)  .  .  ?
  C443  C444'  2.48(3)  .  .  ?
  C443  H43  2.56(4)  .  .  ?
  C443  H442a  2.63(7)  .  .  ?
  C443  H442b  2.59(9)  .  .  ?
  C443  H444'c  2.54(6)  .  .  ?
  C443'  C444  2.39(3)  .  .  ?
  C443'  C444'  2.41(3)  .  .  ?
  C443'  H43  2.64(4)  .  .  ?
  C443'  H442a  2.22(7)  .  .  ?
  C443'  H442b  2.26(9)  .  .  ?
  C443'  H442'a  2.60(6)  .  .  ?
  C443'  H444a  2.58(9)  .  .  ?
  C443'  H444'a  2.60(7)  .  .  ?
  C443'  H444'c  2.61(6)  .  .  ?
  C444  C45  2.94(2)  .  .  ?
  C444  H443b  2.53(6)  .  .  ?
  C444  H443'a  2.45(6)  .  .  ?
  C444  H442a  2.67(7)  .  .  ?
  C444  H442c  2.63(7)  .  .  ?
  C444  H442'a  2.25(5)  .  .  ?
  C444  H442'c  2.14(6)  .  .  ?
  C444  H45  2.65(3)  .  .  ?
  C444'  C45  2.94(2)  .  .  ?
  C444'  H443b  2.28(5)  .  .  ?
  C444'  H443'a  2.53(6)  .  .  ?
  C444'  H442'c  2.64(6)  .  .  ?
  C45  S4  2.764(2)  .  .  ?
  C46  H45  1.97(3)  .  .  ?
  C46  H41a  2.37(6)  .  .  ?
  S4  H33  2.76(3)  .  .  ?
  S4  H31b  2.44(6)  .  .  ?
  S4  H41a  2.61(7)  .  .  ?
  H13  H142b  2.33(3)  .  .  ?
  H13  H143c  2.39(4)  .  .  ?
  H142a  H142b  1.65(4)  .  .  ?
  H142a  H142c  1.60(4)  .  .  ?
  H142b  H142c  1.67(4)  .  .  ?
  H143a  H143a  2.30(4)  .  '3 456'  ?
  H143a  H143b  1.63(4)  .  .  ?
  H143a  H143c  1.60(4)  .  .  ?
  H143b  H143c  1.72(4)  .  .  ?
  H143b  H144c  2.38(4)  .  .  ?
  H143b  H23  2.39(4)  .  '3 557'  ?
  H144a  H144b  1.57(5)  .  .  ?
  H144a  H144c  1.60(4)  .  .  ?
  H144b  H144c  1.60(5)  .  .  ?
  H144b  H15  2.33(3)  .  .  ?
  H144c  H15  2.24(4)  .  .  ?
  H23  H242b  2.34(5)  .  .  ?
  H242a  H242b  1.49(6)  .  .  ?
  H242a  H242c  1.77(7)  .  .  ?
  H242b  H242c  1.77(8)  .  .  ?
  H242c  H244b  2.22(5)  .  .  ?
  H242c  H21a  2.27(8)  .  '3 657'  ?
  H243a  H243b  1.63(6)  .  .  ?
  H243a  H243c  1.75(9)  .  .  ?
  H243b  H243c  1.70(7)  .  .  ?
  H243b  H244c  2.28(7)  .  .  ?
  H244a  H244b  1.55(6)  .  .  ?
  H244a  H244c  1.77(7)  .  .  ?
  H244b  H244c  1.81(6)  .  .  ?
  H244c  H25  2.27(6)  .  .  ?
  H33  H343c  2.20(6)  .  .  ?
  H343a  H343b  1.67(6)  .  .  ?
  H343a  H343c  1.67(7)  .  .  ?
  H343a  H344a  2.37(6)  .  .  ?
  H343a  H342a  2.39(5)  .  .  ?
  H343b  H343c  1.90(6)  .  .  ?
  H343b  H344c  2.38(4)  .  .  ?
  H344a  H344b  1.68(5)  .  .  ?
  H344a  H344c  1.61(5)  .  .  ?
  H344b  H344c  1.71(4)  .  .  ?
  H344b  H35  2.27(5)  .  .  ?
  H342a  H342b  1.57(7)  .  .  ?
  H342a  H342c  1.69(8)  .  .  ?
  H342b  H342c  1.74(7)  .  .  ?
  H43  H443c  2.14(7)  .  .  ?
  H43  H443'c  2.27(12)  .  .  ?
  H443a  H443b  1.50(9)  .  .  ?
  H443a  H443c  1.60(13)  .  .  ?
  H443a  H443'b  1.43(10)  .  .  ?
  H443a  H443'c  1.76(16)  .  .  ?
  H443a  H41b  2.15(16)  .  '1 455'  ?
  H443b  H443c  1.80(10)  .  .  ?
  H443b  H443'a  1.73(9)  .  .  ?
  H443b  H443'c  2.19(14)  .  .  ?
  H443b  H444'c  2.05(8)  .  .  ?
  H443c  H443'a  1.77(12)  .  .  ?
  H443c  H443'b  1.16(10)  .  .  ?
  H443c  H442b  2.24(11)  .  .  ?
  H443'a  H443'b  1.74(10)  .  .  ?
  H443'a  H443'c  1.71(16)  .  .  ?
  H443'a  H442a  2.06(10)  .  .  ?
  H443'a  H442'a  2.36(8)  .  .  ?
  H443'a  H444a  2.24(10)  .  .  ?
  H443'a  H444'a  2.31(9)  .  .  ?
  H443'a  H41b  2.27(15)  .  '1 455'  ?
  H443'b  H443'c  1.72(13)  .  .  ?
  H443'c  H442a  2.07(15)  .  .  ?
  H443'c  H442b  1.49(14)  .  .  ?
  H443'c  H442'b  2.28(13)  .  .  ?
  H442a  H442b  1.55(13)  .  .  ?
  H442a  H442c  1.66(9)  .  .  ?
  H442a  H442'b  1.46(11)  .  .  ?
  H442a  H442'c  2.12(8)  .  .  ?
  H442b  H442c  1.70(11)  .  .  ?
  H442b  H442'a  2.18(11)  .  .  ?
  H442c  H442'a  1.55(9)  .  .  ?
  H442c  H444b  2.26(12)  .  .  ?
  H442'a  H442'b  1.79(11)  .  .  ?
  H442'a  H442'c  1.64(7)  .  .  ?
  H442'a  H444a  1.93(10)  .  .  ?
  H442'a  H444b  2.22(9)  .  .  ?
  H442'b  H442'c  1.78(10)  .  .  ?
  H442'c  H444b  1.50(11)  .  .  ?
  H442'c  H444'b  2.39(10)  .  .  ?
  H444a  H444b  1.55(11)  .  .  ?
  H444a  H444c  2.07(14)  .  .  ?
  H444a  H444'b  1.69(10)  .  .  ?
  H444a  H444'c  2.02(11)  .  .  ?
  H444b  H444c  1.79(16)  .  .  ?
  H444b  H444'a  1.88(10)  .  .  ?
  H444b  H444'c  2.26(10)  .  .  ?
  H444b  H45  2.22(9)  .  .  ?
  H444c  H444'a  1.69(13)  .  .  ?
  H444c  H444'c  1.06(13)  .  .  ?
  H444'a  H444'b  1.63(8)  .  .  ?
  H444'a  H444'c  1.49(9)  .  .  ?
  H444'a  H31b  2.39(9)  .  '1 455'  ?
  H444'a  H41a  2.31(9)  .  '1 455'  ?
  H444'b  H444'c  1.57(10)  .  .  ?
  H444'b  H45  2.21(8)  .  .  ?
  H11a  H11b  1.59(8)  .  .  ?
  H11a  H41a  2.01(9)  .  .  ?
  H11a  H41b  1.29(14)  .  .  ?
  H11b  H21a  1.40(7)  .  .  ?
  H21a  H21b  1.36(9)  .  .  ?
  H21b  H31a  1.16(9)  .  .  ?
  H21b  H31b  2.34(9)  .  .  ?
  H31a  H31b  1.40(8)  .  .  ?
  H31b  H41a  1.39(7)  .  .  ?
  H41a  H41b  1.48(14)  .  .  ?
 
_atom_sites_solution_primary           ?
_atom_sites_solution_secondary         ?
_atom_sites_solution_hydrogens         ?
 
_geom_special_details                  ?
 
 
_cell_special_details
;      ?
;
 
_exptl_special_details
;      ?
;
 
_diffrn_special_details
;      ?
;
 
_chemical_compound_source              ?
_chemical_name_systematic              ?
_chemical_name_common                  ?
_chemical_formula_analytical           ?
_chemical_formula_structural           ?
 
_exptl_crystal_F_000                   1536
 
loop_
_diffrn_standard_refln_index_h
_diffrn_standard_refln_index_k
_diffrn_standard_refln_index_l
  ?  ?  ?
loop_
_diffrn_attenuator_code
_diffrn_attenuator_scale
  ?  ?
 
_reflns_limit_h_min                    0
_reflns_limit_h_max                    12
_reflns_limit_k_min                    0
_reflns_limit_k_max                    42
_reflns_limit_l_min                    -18
_reflns_limit_l_max                    17
_reflns_number_observed                ?
_reflns_d_resolution_high              .726
_reflns_d_resolution_low               15.575
 
_diffrn_reflns_av_sigmaI/netI          .073
_diffrn_reflns_theta_min               1.3
_diffrn_reflns_reduction_process       ?
 
_diffrn_ambient_temperature            153
_diffrn_radiation_source               'sealed tube'
_diffrn_radiation_monochromator        graphite
_diffrn_radiation_detector             'CCD area detector'
 
_refine_ls_extinction_expression       ?
_refine_ls_matrix_type                 full
_refine_ls_number_restraints           0
_refine_ls_number_constraints          0
_refine_ls_R_factor_all                .069
_refine_ls_wR_factor_all               .059
_refine_ls_goodness_of_fit_all         1.364
_refine_ls_shift/su_mean               .002
 
#===END

data_global
 
_audit_creation_method                 Xtal3.6
_audit_creation_date                   99-11-25
_audit_update_record                   ?
 
#==============================================================================
#   (Publishing Staff Use Only)
 
_journal_date_recd_electronic          ?
_journal_date_to_coeditor              ?
_journal_date_from_coeditor            ?
_journal_date_accepted                 ?
_journal_date_printers_first           ?
_journal_date_printers_final           ?
_journal_date_proofs_out               ?
_journal_date_proofs_in                ?
_journal_coeditor_name                 ?
_journal_coeditor_code                 ?
_journal_coeditor_notes
; ?
;
_journal_techeditor_code               ?
_journal_techeditor_notes
; ?
;
_journal_coden_ASTM                    ?
_journal_name_full                     ?
_journal_year                          ?
_journal_volume                        ?
_journal_issue                         ?
_journal_page_first                    ?
_journal_page_last                     ?
_journal_suppl_publ_number             ?
_journal_suppl_publ_pages              ?
 
#=======================================================================
 
# 1. SUBMISSION DETAILS
#----------------------
 
_publ_contact_author_name
     'Skelton, B. W.'
_publ_contact_author_address
;
   Department of Chemistry
   University of Western Australia
   Nedlands
   Western Australia 6907
   Australia
;
_publ_contact_author_email            bws@crystal.uwa.edu.au
_publ_contact_author_fax               (+61)_08_9380_1118
_publ_contact_author_phone             (+61)_08-9380_3481
 
_publ_contact_letter
;    ?                                      #<< contact letter
;
 
_publ_requested_journal   'Inorg.Chem.'                     
_publ_requested_category               ?  
 
_publ_section_title
;    ?                                      #<< paper title text
;
_publ_section_title_footnote
;    ?                                      #<< paper footnote text
;
 
loop_
_publ_author_name
_publ_author_footnote
_publ_author_address
 
 
'Skelton, Brian W.' .
; Department of Chemistry,
University of Western Australia,
Nedlands,
WA 6907
Australia.
;
 
 
_publ_section_synopsis
;    ?                                     #<< synopsis if FI,CI,CM,CO papers
;
_publ_section_abstract
;    ?                                     #<< abstract text
;
_publ_section_comment
;    ?                                     #<< scientific commentary text
;
 
_publ_section_exptl_prep
;    ?                        #<< material & crystal preparation text
;
 
_publ_section_exptl_refinement
;    ?                        #<< crystallographic methods used
;
 
_publ_section_acknowledgements
;    ?                                     #<< acknowledgements text
;
 
_publ_section_references
;
 
 Hall, S.R., King, G.S.D., and Stewart., J.M. (1995).
 The Xtal 3.5 User's Manual.  University of Western Australia, Lamb: Perth.
;
_publ_section_figure_captions
;    ?                                     #<< figure captions
;
 
 
#=======================================================================
#  Data block for single structure (one for each study in the paper)
#=======================================================================
 
 
data_abbs4
 
 
# 2. EXPERIMENTAL DATA
#---------------------
 
 
_chemical_formula_sum                 'C41 H49 Cl3 O4 S4'             
_chemical_formula_moiety               ?
_chemical_formula_weight               840.46
_chemical_melting_point                ?
 
_symmetry_cell_setting                 tetragonal
_symmetry_space_group_name_H-M         P_4/n_c_c:2
_symmetry_space_group_name_Hall        -p_4a_2ac
 
loop_
_symmetry_equiv_pos_as_xyz
  +x,+y,+z  1/2+x,-y,1/2-z  1/2-x,1/2-y,+z  -x,1/2+y,1/2-z  1/2+y,1/2+x,1/2-z
  +y,1/2-x,+z  1/2-y,+x,+z  -y,-x,1/2-z  -x,-y,-z  1/2-x,+y,1/2+z
  1/2+x,1/2+y,-z  +x,1/2-y,1/2+z  1/2-y,1/2-x,1/2+z  -y,1/2+x,-z  1/2+y,-x,-z
  +y,+x,1/2+z
 
_cell_length_a                         15.824(7)
_cell_length_b                         15.824(7)
_cell_length_c                         17.383(9)
_cell_angle_alpha                      90.00000
_cell_angle_beta                       90.00000
_cell_angle_gamma                      90.00000
_cell_volume                           4353(4)
_cell_formula_units_Z                  4  
 
_exptl_crystal_density_diffrn          1.283
_exptl_crystal_density_meas            ?
_exptl_crystal_density_method          ?
_diffrn_radiation_type                'Mo K\a'
_diffrn_radiation_wavelength           .71073
 
_cell_measurement_reflns_used          8 
_cell_measurement_theta_min            12.2
_cell_measurement_theta_max            12.2
_cell_measurement_temperature          293
 
_exptl_absorpt_coefficient_mu          .441
_exptl_crystal_description             block
_exptl_crystal_size_max                1.20
_exptl_crystal_size_mid                1.00
_exptl_crystal_size_min                .50
_exptl_crystal_size_rad                ?
_exptl_crystal_colour                  colourless
 
_diffrn_measurement_device_type
;
 CAD4 diffractometer
;
_diffrn_measurement_method             '2\q-\w scans'
_diffrn_detector_area_resol_mean       ?
 
_exptl_absorpt_correction_type         gaussian      
_exptl_absorpt_process_details
;
 XTAL absorb              
;
_exptl_absorpt_correction_T_min        .66
_exptl_absorpt_correction_T_max        .81
 
_diffrn_reflns_number                  8795
_reflns_number_total                   1926
_reflns_Friedel_coverage               ?
_reflns_number_gt                      817
_reflns_threshold_expression          'I    > 3.00 sig(I   )'
 
_diffrn_reflns_theta_max               25.0
_diffrn_reflns_theta_full              ?
_diffrn_measured_fraction_theta_max    ?
_diffrn_measured_fraction_theta_full   ?
_diffrn_reflns_av_R_equivalents        .114
_diffrn_reflns_limit_h_min             0
_diffrn_reflns_limit_h_max             13
_diffrn_reflns_limit_k_min             0   
_diffrn_reflns_limit_k_max             13
_diffrn_reflns_limit_l_min             -20
_diffrn_reflns_limit_l_max             20
_diffrn_standards_number               8
_diffrn_standards_interval_count       ?
_diffrn_standards_interval_time        60
_diffrn_standards_decay_%              0
 
 
_refine_ls_structure_factor_coef       F 
_refine_ls_R_factor_gt                 .073
_refine_ls_wR_factor_ref               .088
_refine_ls_goodness_of_fit_ref         2.035
_refine_ls_number_reflns               817
_refine_ls_number_parameters           136
_refine_ls_weighting_scheme            sigma
_refine_ls_weighting_details           ?
_refine_ls_hydrogen_treatment          noref
_refine_ls_shift/su_max               .084
_refine_diff_density_min               -.47
_refine_diff_density_max               .51
 
_refine_ls_extinction_method           ?
_refine_ls_extinction_coef             ?
_refine_ls_abs_structure_details       ?
_refine_ls_abs_structure_Flack         ?
 
 
# 3. Information for the "methods" section
#-----------------------------------------
 
_computing_data_collection             'Enraf Nonius software'          
_computing_cell_refinement             'Enraf Nonius software'          
_computing_data_reduction              xtal
_computing_structure_solution          xtal
_computing_structure_refinement        xtal
_computing_molecular_graphics          xtal
_computing_publication_material       'xtal BONDLA CIFIO'
 
 
# 4. Supplementary data for validation and tables
#------------------------------------------------
 
loop_
_atom_type_symbol
_atom_type_description
_atom_type_oxidation_number
_atom_type_number_in_cell
_atom_type_scat_dispersion_real
_atom_type_scat_dispersion_imag
_atom_type_scat_source
  C  ?  0  164  .002  .002  'Int Tables Vol IV Tables 2.2B and 2.3.1'
  O  ?  0  16  .008  .006  'Int Tables Vol IV Tables 2.2B and 2.3.1'
  H  ?  0  196  0  0  'Int Tables Vol IV Tables 2.2B and 2.3.1'
  S  ?  0  16  .11  .124  'Int Tables Vol IV Tables 2.2B and 2.3.1'
  Cl  ?  0  12  .132  .159  'Int Tables Vol IV Tables 2.2B and 2.3.1'
 
loop_
_atom_site_label
_atom_site_fract_x
_atom_site_fract_y
_atom_site_fract_z
_atom_site_U_iso_or_equiv
_atom_site_adp_type
_atom_site_calc_flag
_atom_site_calc_attached_atom
_atom_site_occupancy
_atom_site_disorder_assembly
_atom_site_disorder_group
  O1  .6248(3)  .7269(3)  .1100(2)  .076(3)  Uani  ?  ?  1.00000  ?  ?
  C1  .5781(4)  .7163(4)  .1754(3)  .063(4)  Uani  ?  ?  1.00000  ?  ?
  C2  .5704(4)  .6377(4)  .2099(3)  .064(4)  Uani  ?  ?  1.00000  ?  ?
  S2  .61328(11)  .54603(11)  .16519(11)  .0746(12)  Uani  ?  ?  1.00000  ?  ?
  C3  .5251(4)  .6298(4)  .2783(4)  .074(5)  Uani  ?  ?  1.00000  ?  ?
  C4  .4882(5)  .6977(4)  .3153(4)  .082(5)  Uani  ?  ?  1.00000  ?  ?
  C41  .4364(6)  .6880(6)  .3885(5)  .121(7)  Uani  ?  ?  1.00000  ?  ?
  C42  .4429(15)  .7647(9)  .4360(8)  .32(2)  Uani  ?  ?  1.00000  ?  ?
  C43  .4613(8)  .6128(8)  .4335(5)  .162(10)  Uani  ?  ?  1.00000  ?  ?
  C44  .3463(7)  .6716(11)  .3642(7)  .220(13)  Uani  ?  ?  1.00000  ?  ?
  C5  .4949(4)  .7737(4)  .2775(4)  .078(5)  Uani  ?  ?  1.00000  ?  ?
  C6  .5400(4)  .7863(4)  .2096(3)  .068(4)  Uani  ?  ?  1.00000  ?  ?
  Cl1  .75000  .75000  .2966(3)  .152(3)  Uani  ?  ?  1.00000  ?  ?
  Cl2  .6744(17)  .692(2)  .4237(7)  .29(2)  Uani  ?  ?  .25000  ?  ?
  Cl3  .7689(16)  .8342(7)  .4361(5)  .206(14)  Uani  ?  ?  .25000  ?  ?
  C0  .7073(13)  .751(4)  .3747(11)  .073(8)  Uiso  ?  ?  .25000  ?  ?
  H1  .65125  .67426  .09722  .10000  Uiso  ?  ?  1.00000  ?  ?
  H3  .51758  .57281  .30042  .09500  Uiso  ?  ?  1.00000  ?  ?
  H42a  .41250  .75390  .48423  .40000  Uiso  ?  ?  1.00000  ?  ?
  H42b  .41012  .80757  .40957  .40000  Uiso  ?  ?  1.00000  ?  ?
  H42c  .49982  .78420  .44662  .40000  Uiso  ?  ?  1.00000  ?  ?
  H43a  .51892  .60846  .44526  .22000  Uiso  ?  ?  1.00000  ?  ?
  H43b  .44345  .55927  .41004  .22000  Uiso  ?  ?  1.00000  ?  ?
  H43c  .43022  .60985  .48223  .22000  Uiso  ?  ?  1.00000  ?  ?
  H44a  .32174  .72988  .34765  .30000  Uiso  ?  ?  1.00000  ?  ?
  H44b  .34735  .64248  .31462  .30000  Uiso  ?  ?  1.00000  ?  ?
  H44c  .32116  .63503  .40210  .30000  Uiso  ?  ?  1.00000  ?  ?
  H5  .47137  .82270  .30144  .10000  Uiso  ?  ?  1.00000  ?  ?
  H0  .69477  .81102  .35946  .12000  Uiso  ?  ?  .25000  ?  ?
 
loop_
_atom_site_aniso_label
_atom_site_aniso_U_11
_atom_site_aniso_U_22
_atom_site_aniso_U_33
_atom_site_aniso_U_12
_atom_site_aniso_U_13
_atom_site_aniso_U_23
  O1  .082(3)  .078(3)  .067(3)  .003(3)  .015(2)  -.007(2)
  C1  .050(4)  .079(5)  .059(4)  -.004(3)  -.007(3)  -.015(4)
  C2  .047(4)  .071(4)  .074(4)  -.012(3)  .000(3)  -.020(4)
  S2  .0723(12)  .0672(12)  .0844(13)  -.0083(10)  .0096(11)  -.0264(10)
  C3  .071(5)  .073(5)  .078(5)  -.012(4)  .018(4)  -.002(4)
  C4  .088(5)  .073(4)  .085(5)  -.009(4)  .024(4)  -.010(4)
  C41  .143(7)  .119(7)  .102(6)  -.003(7)  .068(6)  -.012(6)
  C42  .62(3)  .165(11)  .190(13)  -.072(18)  .257(17)  -.097(11)
  C43  .179(11)  .212(12)  .094(6)  -.008(10)  .069(7)  .001(7)
  C44  .132(10)  .313(17)  .215(12)  .012(11)  .086(10)  .073(13)
  C5  .064(4)  .091(5)  .080(5)  -.002(4)  .006(4)  -.035(4)
  C6  .062(4)  .069(5)  .071(4)  .002(3)  -.013(3)  -.017(3)
  Cl1  .185(3)  .185(3)  .086(3)  .00000  .00000  .00000
  Cl2  .26(2)  .47(4)  .148(10)  -.213(19)  -.046(14)  .09(2)
  Cl3  .39(3)  .127(8)  .097(6)  .132(17)  -.068(12)  -.067(6)
 
 
# 5. Molecular Geometry
#----------------------
 
loop_
_geom_bond_atom_site_label_1
_geom_bond_atom_site_label_2
_geom_bond_site_symmetry_1
_geom_bond_site_symmetry_2
_geom_bond_distance
_geom_bond_publ_flag                 #<< enter YES for value to be published
  O1  C1  .  .  1.366(7)  ?
  O1  H1  .  .  .958(4)  ?
  C1  C2  .  .  1.386(9)  ?
  C1  C6  .  .  1.394(9)  ?
  C2  S2  .  .  1.780(6)  ?
  C2  C3  .  .  1.394(9)  ?
  S2  C6  .  '7 655'  1.770(6)  ?
  C3  C4  .  .  1.382(9)  ?
  C3  H3  .  .  .987(6)  ?
  C4  C41  .  .  1.521(11)  ?
  C4  C5  .  .  1.375(10)  ?
  C41  C42  .  .  1.472(17)  ?
  C41  C43  .  .  1.476(15)  ?
  C41  C44  .  .  1.510(15)  ?
  C42  H42a  .  .  .982(16)  ?
  C42  H42b  .  .  .970(17)  ?
  C42  H42c  .  .  .97(2)  ?
  C43  H43a  .  .  .938(12)  ?
  C43  H43b  .  .  .982(12)  ?
  C43  H43c  .  .  .981(10)  ?
  C44  H44a  .  .  1.041(17)  ?
  C44  H44b  .  .  .977(14)  ?
  C44  H44c  .  .  .962(14)  ?
  C5  C6  .  .  1.393(9)  ?
  C5  H5  .  .  .956(7)  ?
  Cl1  C0  .  .  1.52(2)  ?
  Cl1  C0  .  '3 665'  1.52(2)  ?
  Cl1  C0  .  '6 565'  1.52(2)  ?
  Cl1  C0  .  '7 655'  1.52(2)  ?
  Cl2  C0  .  .  1.37(5)  ?
  Cl2  Cl3  .  '3 665'  1.01(4)  ?
  Cl2  Cl3  .  '7 655'  1.25(4)  ?
  Cl2  C0  .  '7 655'  1.48(5)  ?
  Cl2  H0  .  '7 655'  1.141(13)  ?
  Cl3  C0  .  .  1.96(4)  ?
  Cl3  C0  .  '3 665'  1.76(5)  ?
  Cl3  Cl3  .  '6 565'  1.93(3)  ?
  Cl3  C0  .  '6 565'  1.28(3)  ?
  Cl3  Cl3  .  '7 655'  1.93(3)  ?
  C0  H0  .  .  1.01(6)  ?
  C0  C0  .  '3 665'  1.35(3)  ?
  C0  C0  .  '6 565'  .96(6)  ?
  C0  C0  .  '7 655'  .96(6)  ?
  C0  H0  .  '7 655'  .97(5)  ?
 
loop_
_geom_angle_atom_site_label_1
_geom_angle_atom_site_label_2
_geom_angle_atom_site_label_3
_geom_angle_site_symmetry_1
_geom_angle_site_symmetry_2
_geom_angle_site_symmetry_3
_geom_angle
_geom_angle_publ_flag                #<< enter YES for value to be published
  C1  O1  H1  .  .  .  108.8(4)  ?
  O1  C1  C2  .  .  .  121.2(5)  ?
  O1  C1  C6  .  .  .  119.4(5)  ?
  C2  C1  C6  .  .  .  119.4(5)  ?
  C1  C2  S2  .  .  .  120.6(5)  ?
  C1  C2  C3  .  .  .  119.6(6)  ?
  S2  C2  C3  .  .  .  119.7(5)  ?
  C2  S2  C6  .  .  '7 655'  101.3(3)  ?
  C2  C3  C4  .  .  .  123.0(6)  ?
  C2  C3  H3  .  .  .  118.5(6)  ?
  C4  C3  H3  .  .  .  118.5(6)  ?
  C3  C4  C41  .  .  .  122.6(6)  ?
  C3  C4  C5  .  .  .  115.1(6)  ?
  C41  C4  C5  .  .  .  122.0(7)  ?
  C4  C41  C42  .  .  .  110.4(9)  ?
  C4  C41  C43  .  .  .  112.4(8)  ?
  C4  C41  C44  .  .  .  107.0(7)  ?
  C42  C41  C43  .  .  .  110.4(9)  ?
  C42  C41  C44  .  .  .  111.4(13)  ?
  C43  C41  C44  .  .  .  105.2(10)  ?
  C41  C42  H42a  .  .  .  107.5(13)  ?
  C41  C42  H42b  .  .  .  105.9(13)  ?
  C41  C42  H42c  .  .  .  115.7(17)  ?
  H42a  C42  H42b  .  .  .  105(2)  ?
  H42a  C42  H42c  .  .  .  110.4(15)  ?
  H42b  C42  H42c  .  .  .  111.4(15)  ?
  C41  C43  H43a  .  .  .  115.8(11)  ?
  C41  C43  H43b  .  .  .  113.5(9)  ?
  C41  C43  H43c  .  .  .  111.3(10)  ?
  H43a  C43  H43b  .  .  .  107.8(12)  ?
  H43a  C43  H43c  .  .  .  107.1(9)  ?
  H43b  C43  H43c  .  .  .  99.9(11)  ?
  C41  C44  H44a  .  .  .  106.1(12)  ?
  C41  C44  H44b  .  .  .  108.1(10)  ?
  C41  C44  H44c  .  .  .  107.5(10)  ?
  H44a  C44  H44b  .  .  .  100.4(11)  ?
  H44a  C44  H44c  .  .  .  124.6(12)  ?
  H44b  C44  H44c  .  .  .  109.1(17)  ?
  C4  C5  C6  .  .  .  124.7(6)  ?
  C4  C5  H5  .  .  .  118.1(6)  ?
  C6  C5  H5  .  .  .  116.9(6)  ?
  C1  C6  C5  .  .  .  118.0(6)  ?
  C1  C6  S2  .  .  '6 565'  120.3(5)  ?
  C5  C6  S2  .  .  '6 565'  121.7(5)  ?
  C0  Cl1  C0  .  .  '3 665'  53.0(11)  ?
  C0  Cl1  C0  .  .  '6 565'  37(2)  ?
  C0  Cl1  C0  .  .  '7 655'  37(2)  ?
  C0  Cl1  C0  '3 665'  .  '6 565'  37(2)  ?
  C0  Cl1  C0  '3 665'  .  '7 655'  37(2)  ?
  C0  Cl1  C0  '6 565'  .  '7 655'  53.0(11)  ?
  C0  Cl2  Cl3  .  .  '3 665'  94(2)  ?
  C0  Cl2  Cl3  .  .  '7 655'  58(2)  ?
  C0  Cl2  C0  .  .  '7 655'  39(2)  ?
  C0  Cl2  H0  .  .  '7 655'  44.3(19)  ?
  Cl3  Cl2  Cl3  '3 665'  .  '7 655'  117(3)  ?
  Cl3  Cl2  C0  '3 665'  .  '7 655'  59(2)  ?
  Cl3  Cl2  H0  '3 665'  .  '7 655'  92.7(19)  ?
  Cl3  Cl2  C0  '7 655'  .  '7 655'  91(2)  ?
  Cl3  Cl2  H0  '7 655'  .  '7 655'  98(2)  ?
  C0  Cl2  H0  '7 655'  .  '7 655'  42.8(16)  ?
  C0  Cl3  Cl2  .  .  '3 665'  93(2)  ?
  C0  Cl3  C0  .  .  '3 665'  42.3(12)  ?
  C0  Cl3  Cl2  .  .  '6 565'  49.1(15)  ?
  C0  Cl3  Cl3  .  .  '6 565'  72.4(14)  ?
  C0  Cl3  C0  .  .  '6 565'  25(2)  ?
  C0  Cl3  Cl3  .  .  '7 655'  38.6(8)  ?
  Cl2  Cl3  C0  '3 665'  .  '3 665'  51.0(18)  ?
  Cl2  Cl3  Cl2  '3 665'  .  '6 565'  142(2)  ?
  Cl2  Cl3  Cl3  '3 665'  .  '6 565'  35(2)  ?
  Cl2  Cl3  C0  '3 665'  .  '6 565'  79(3)  ?
  Cl2  Cl3  Cl3  '3 665'  .  '7 655'  122(2)  ?
  C0  Cl3  Cl2  '3 665'  .  '6 565'  91.3(15)  ?
  C0  Cl3  Cl3  '3 665'  .  '6 565'  40.4(11)  ?
  C0  Cl3  C0  '3 665'  .  '6 565'  32(2)  ?
  C0  Cl3  Cl3  '3 665'  .  '7 655'  76.8(12)  ?
  Cl2  Cl3  Cl3  '6 565'  .  '6 565'  115.6(15)  ?
  Cl2  Cl3  C0  '6 565'  .  '6 565'  65(3)  ?
  Cl2  Cl3  Cl3  '6 565'  .  '7 655'  27.8(14)  ?
  Cl3  Cl3  C0  '6 565'  .  '6 565'  72(2)  ?
  Cl3  Cl3  Cl3  '6 565'  .  '7 655'  90.0(9)  ?
  C0  Cl3  Cl3  '6 565'  .  '7 655'  63(2)  ?
  Cl1  C0  Cl2  .  .  .  136(4)  ?
  Cl1  C0  Cl3  .  .  .  106(2)  ?
  Cl1  C0  H0  .  .  .  82(2)  ?
  Cl1  C0  Cl3  .  .  '3 665'  116(3)  ?
  Cl1  C0  C0  .  .  '3 665'  63.5(12)  ?
  Cl1  C0  Cl2  .  .  '6 565'  127(4)  ?
  Cl1  C0  C0  .  .  '6 565'  72(2)  ?
  Cl1  C0  Cl3  .  .  '7 655'  167(5)  ?
  Cl1  C0  C0  .  .  '7 655'  72(2)  ?
  Cl1  C0  H0  .  .  '7 655'  83(2)  ?
  Cl2  C0  Cl3  .  .  .  108.2(15)  ?
  Cl2  C0  H0  .  .  .  137(3)  ?
  Cl2  C0  Cl3  .  .  '3 665'  34.9(18)  ?
  Cl2  C0  C0  .  .  '3 665'  111(4)  ?
  Cl2  C0  Cl2  .  .  '6 565'  97(2)  ?
  Cl2  C0  C0  .  .  '6 565'  138(3)  ?
  Cl2  C0  Cl3  .  .  '7 655'  56(2)  ?
  Cl2  C0  C0  .  .  '7 655'  76(4)  ?
  Cl2  C0  H0  .  .  '7 655'  55(3)  ?
  Cl3  C0  H0  .  .  .  67(2)  ?
  Cl3  C0  Cl3  .  .  '3 665'  94.4(11)  ?
  Cl3  C0  C0  .  .  '3 665'  61(3)  ?
  Cl3  C0  Cl2  .  .  '6 565'  39.8(18)  ?
  Cl3  C0  C0  .  .  '6 565'  34.3(19)  ?
  Cl3  C0  Cl3  .  .  '7 655'  70(2)  ?
  Cl3  C0  C0  .  .  '7 655'  98(3)  ?
  Cl3  C0  H0  .  .  '7 655'  156(3)  ?
  H0  C0  Cl3  .  .  '3 665'  158(3)  ?
  H0  C0  C0  .  .  '3 665'  103(4)  ?
  H0  C0  Cl2  .  .  '6 565'  50(2)  ?
  H0  C0  C0  .  .  '6 565'  59(4)  ?
  H0  C0  Cl3  .  .  '7 655'  85(3)  ?
  H0  C0  C0  .  .  '7 655'  145(4)  ?
  H0  C0  H0  .  .  '7 655'  137(2)  ?
  Cl3  C0  C0  '3 665'  .  '3 665'  77(3)  ?
  Cl3  C0  Cl2  '3 665'  .  '6 565'  107.4(14)  ?
  Cl3  C0  C0  '3 665'  .  '6 565'  112(3)  ?
  Cl3  C0  Cl3  '3 665'  .  '7 655'  77(2)  ?
  Cl3  C0  C0  '3 665'  .  '7 655'  45(3)  ?
  Cl3  C0  H0  '3 665'  .  '7 655'  62(3)  ?
  C0  C0  Cl2  '3 665'  .  '6 565'  101(4)  ?
  C0  C0  C0  '3 665'  .  '6 565'  45(4)  ?
  C0  C0  Cl3  '3 665'  .  '7 655'  121(2)  ?
  C0  C0  C0  '3 665'  .  '7 655'  45(4)  ?
  C0  C0  H0  '3 665'  .  '7 655'  106(4)  ?
  Cl2  C0  C0  '6 565'  .  '6 565'  65(4)  ?
  Cl2  C0  Cl3  '6 565'  .  '7 655'  42(2)  ?
  Cl2  C0  C0  '6 565'  .  '7 655'  134(3)  ?
  Cl2  C0  H0  '6 565'  .  '7 655'  147(2)  ?
  C0  C0  Cl3  '6 565'  .  '7 655'  102(4)  ?
  C0  C0  C0  '6 565'  .  '7 655'  90(4)  ?
  C0  C0  H0  '6 565'  .  '7 655'  148(4)  ?
  Cl3  C0  C0  '7 655'  .  '7 655'  121(3)  ?
  Cl3  C0  H0  '7 655'  .  '7 655'  106(3)  ?
  C0  C0  H0  '7 655'  .  '7 655'  63(4)  ?
  C0  H0  Cl2  .  .  '6 565'  87(2)  ?
  C0  H0  C0  .  .  '6 565'  58(2)  ?
  Cl2  H0  C0  '6 565'  .  '6 565'  81(2)  ?
 
loop_
_geom_torsion_atom_site_label_1
_geom_torsion_atom_site_label_2
_geom_torsion_atom_site_label_3
_geom_torsion_atom_site_label_4
_geom_torsion_site_symmetry_1
_geom_torsion_site_symmetry_2
_geom_torsion_site_symmetry_3
_geom_torsion_site_symmetry_4
_geom_torsion
_geom_torsion_publ_flag              #<< enter YES for value to be published
     ?  ?  ?  ?  ?  ?  ?  ?  ?  ?
 
loop_
_geom_hbond_atom_site_label_D
_geom_hbond_atom_site_label_H
_geom_hbond_atom_site_label_A
_geom_hbond_site_symmetry_D
_geom_hbond_site_symmetry_H
_geom_hbond_site_symmetry_A
_geom_hbond_distance_DH
_geom_hbond_distance_HA
_geom_hbond_distance_DA
_geom_hbond_angle_DHA
_geom_hbond_publ_flag               #<< enter YES for value to be published
      ?  ?  ?  ?  ?  ?  ?  ?  ?  ?  ?
 
 
#--------------------------------------------------------------------------
#      Special items requested by author for inclusion in paper
#--------------------------------------------------------------------------
 
loop_
_publ_manuscript_incl_extra_item
_publ_manuscript_incl_extra_defn
                       ?  ?
 
#--------------------------------------------------------------------------
#       Items which are non-mandatory for Acta C submissions
#--------------------------------------------------------------------------
 
loop_
_geom_contact_atom_site_label_1
_geom_contact_atom_site_label_2
_geom_contact_distance
_geom_contact_site_symmetry_1
_geom_contact_site_symmetry_2
_geom_contact_publ_flag
  O1  O1  4.028(6)  .  '3 665'  ?
  O1  O1  2.848(6)  .  '7 655'  ?
  O1  O1  2.848(6)  .  '6 565'  ?
  O1  C1  3.592(7)  .  '6 565'  ?
  O1  C1  3.627(7)  .  '7 655'  ?
  O1  C2  3.653(8)  .  '6 565'  ?
  O1  C2  2.397(7)  .  .  ?
  O1  S2  3.024(5)  .  .  ?
  O1  S2  2.979(5)  .  '6 565'  ?
  O1  C3  3.661(8)  .  .  ?
  O1  C5  3.640(8)  .  .  ?
  O1  C6  2.384(7)  .  .  ?
  O1  Cl1  3.818(6)  .  .  ?
  O1  Cl2  3.507(17)  .  '16 554'  ?
  O1  Cl2  3.575(18)  .  '12 564'  ?
  O1  Cl3  3.854(14)  .  '10 654'  ?
  O1  Cl3  3.093(9)  .  '13 664'  ?
  O1  H1  2.093(4)  .  '6 565'  ?
  C1  S2  2.751(7)  .  '6 565'  ?
  C1  S2  2.756(7)  .  .  ?
  C1  C3  2.402(9)  .  .  ?
  C1  C4  2.833(9)  .  .  ?
  C1  C5  2.389(9)  .  .  ?
  C1  H1  1.905(6)  .  .  ?
  C2  C4  2.440(9)  .  .  ?
  C2  C5  2.728(9)  .  .  ?
  C2  C6  2.400(9)  .  .  ?
  C2  C6  2.745(9)  .  '7 655'  ?
  C2  H1  2.410(6)  .  .  ?
  C2  H3  2.056(6)  .  .  ?
  S2  S2  4.626(3)  .  '8 665'  ?
  S2  C3  2.751(7)  .  .  ?
  S2  C43  3.969(12)  .  '8 665'  ?
  S2  C5  2.769(7)  .  '7 655'  ?
  S2  H1  2.424(2)  .  .  ?
  S2  H3  2.828(2)  .  .  ?
  S2  H3  3.169(2)  .  '8 665'  ?
  S2  H43b  3.032(2)  .  '8 665'  ?
  S2  H43c  3.671(2)  .  '16 554'  ?
  S2  H5  2.834(2)  .  '7 655'  ?
  C3  C41  2.547(11)  .  .  ?
  C3  C43  2.893(11)  .  .  ?
  C3  C5  2.327(9)  .  .  ?
  C3  C6  2.759(9)  .  .  ?
  C4  C42  2.458(16)  .  .  ?
  C4  C43  2.490(12)  .  .  ?
  C4  C44  2.436(14)  .  .  ?
  C4  C6  2.452(9)  .  .  ?
  C4  H3  2.046(7)  .  .  ?
  C4  H42b  2.690(7)  .  .  ?
  C4  H42c  2.668(7)  .  .  ?
  C4  H44b  2.393(7)  .  .  ?
  C4  H5  2.011(7)  .  .  ?
  C41  C5  2.534(11)  .  .  ?
  C41  H42a  2.000(9)  .  .  ?
  C41  H42b  1.972(9)  .  .  ?
  C41  H42c  2.085(9)  .  .  ?
  C41  H43a  2.064(9)  .  .  ?
  C41  H43b  2.074(9)  .  .  ?
  C41  H43c  2.047(9)  .  .  ?
  C41  H44a  2.058(9)  .  .  ?
  C41  H44b  2.038(9)  .  .  ?
  C41  H44c  2.021(10)  .  .  ?
  C41  H5  2.673(9)  .  .  ?
  C42  C43  2.42(2)  .  .  ?
  C42  C44  2.46(2)  .  .  ?
  C42  C5  2.879(16)  .  .  ?
  C42  H43c  2.587(14)  .  .  ?
  C42  H44a  2.52(2)  .  .  ?
  C42  H5  2.553(14)  .  .  ?
  C43  C44  2.372(17)  .  .  ?
  C43  H3  2.558(9)  .  .  ?
  C43  H42a  2.521(12)  .  .  ?
  C43  H44c  2.310(12)  .  .  ?
  C44  H42a  2.674(14)  .  .  ?
  C44  H42b  2.505(17)  .  .  ?
  C44  H43b  2.482(15)  .  .  ?
  C44  H43c  2.632(13)  .  .  ?
  C6  H5  2.015(6)  .  .  ?
  Cl1  Cl2  2.68(2)  .  '6 565'  ?
  Cl1  Cl2  2.68(2)  .  '7 655'  ?
  Cl1  Cl2  2.68(2)  .  '3 665'  ?
  Cl1  Cl2  2.68(2)  .  .  ?
  Cl1  Cl3  2.782(10)  .  '6 565'  ?
  Cl1  Cl3  2.782(10)  .  .  ?
  Cl1  Cl3  2.782(10)  .  '3 665'  ?
  Cl1  Cl3  2.782(10)  .  '7 655'  ?
  Cl1  H0  1.700(3)  .  '7 655'  ?
  Cl1  H0  1.700(3)  .  '6 565'  ?
  Cl1  H0  1.700(3)  .  '3 665'  ?
  Cl1  H0  1.700(3)  .  .  ?
  Cl2  Cl2  2.14(4)  .  '6 565'  ?
  Cl2  Cl2  2.14(4)  .  '7 655'  ?
  Cl2  Cl2  3.03(4)  .  '3 665'  ?
  Cl2  Cl3  2.72(4)  .  .  ?
  Cl2  Cl3  2.61(3)  .  '6 565'  ?
  Cl2  C0  2.25(4)  .  '3 665'  ?
  Cl2  C0  2.18(5)  .  '6 565'  ?
  Cl2  H43a  2.81(3)  .  .  ?
  Cl2  H0  2.22(3)  .  .  ?
  Cl2  H0  2.35(2)  .  '3 665'  ?
  Cl3  Cl3  2.730(17)  .  '3 665'  ?
  Cl3  C0  2.30(2)  .  '7 655'  ?
  Cl3  H42c  2.645(11)  .  '6 565'  ?
  Cl3  H0  1.812(17)  .  .  ?
  Cl3  H0  1.558(13)  .  '6 565'  ?
  Cl3  H0  2.870(14)  .  '7 655'  ?
  Cl3  H0  2.717(11)  .  '3 665'  ?
  C0  H0  1.85(4)  .  '3 665'  ?
  C0  H0  1.87(3)  .  '6 565'  ?
  H3  H43b  2.2479(9)  .  .  ?
  H42a  H42b  1.5515(6)  .  .  ?
  H42a  H42c  1.6020(5)  .  .  ?
  H42a  H43c  2.2969(10)  .  .  ?
  H42a  H44c  2.3670(9)  .  '14 656'  ?
  H42b  H42c  1.6020(6)  .  .  ?
  H42b  H44a  2.1508(6)  .  .  ?
  H42b  H5  2.1283(9)  .  .  ?
  H43a  H43b  1.5514(5)  .  .  ?
  H43a  H43c  1.5439(6)  .  .  ?
  H43b  H43c  1.5030(6)  .  .  ?
  H43b  H44c  2.2806(8)  .  .  ?
  H43c  H44c  2.2533(7)  .  .  ?
  H44a  H44a  2.3580(10)  .  '3 565'  ?
  H44a  H44b  1.5513(6)  .  .  ?
  H44a  H44c  1.7745(6)  .  .  ?
  H44b  H44b  2.2581(12)  .  '8 665'  ?
  H44b  H44c  1.5805(8)  .  .  ?
  H0  H0  1.8418(8)  .  '6 565'  ?
  H0  H0  1.8418(8)  .  '7 655'  ?
 
_atom_sites_solution_primary           ?
_atom_sites_solution_secondary         ?
_atom_sites_solution_hydrogens         ?
 
_geom_special_details                  ?
 
 
_cell_special_details
;      ?
;
 
_exptl_special_details
;      ?
;
 
_diffrn_special_details
;      ?
;
 
_chemical_compound_source              ?
_chemical_name_systematic              ?
_chemical_name_common                  ?
_chemical_formula_analytical           ?
_chemical_formula_structural           ?
 
_exptl_crystal_F_000                   1768
 
loop_
_diffrn_standard_refln_index_h
_diffrn_standard_refln_index_k
_diffrn_standard_refln_index_l
  ?  ?  ?
loop_
_diffrn_attenuator_code
_diffrn_attenuator_scale
  ?  ?
 
_reflns_limit_h_min                    0
_reflns_limit_h_max                    18
_reflns_limit_k_min                    0
_reflns_limit_k_max                    18
_reflns_limit_l_min                    0
_reflns_limit_l_max                    20
_reflns_number_observed                817
_reflns_d_resolution_high              ?
_reflns_d_resolution_low               ?
 
_diffrn_reflns_av_sigmaI/netI          ?
_diffrn_reflns_theta_min               ?
_diffrn_reflns_reduction_process       ?
 
_diffrn_ambient_temperature            293
_diffrn_radiation_source               'rotating anode'  
_diffrn_radiation_monochromator        graphite
_diffrn_radiation_detector             'scintillation counter' 
 
_refine_ls_extinction_expression       ?
_refine_ls_matrix_type                 full
_refine_ls_number_restraints           0
_refine_ls_number_constraints          0
_refine_ls_R_factor_all                .141
_refine_ls_wR_factor_all               .114
_refine_ls_goodness_of_fit_all         1.664
_refine_ls_shift/su_mean               .0083
 
 
 
#==========================================================================
#       Structure Factor lists should be submitted as separate files
#==========================================================================
 
#data_<structure> # but for xtal use the refln data is needed in same block
 
loop_
_refln_index_h
_refln_index_k
_refln_index_l
_refln_F_meas
_refln_F_calc
_refln_F_sigma
_refln_F_squared_meas
_refln_F_squared_calc
_refln_F_squared_sigma
_refln_observed_status
_refln_F_meas_friedel
_refln_F_sigma_friedel
_refln_F_squared_meas_friedel
_refln_F_squared_sigma_friedel
 
#===END

data_global
 
_audit_creation_method                 Xtal3.6
_audit_creation_date                   99-07-25
_audit_update_record                   ?
 
#==============================================================================
#   (Publishing Staff Use Only)
 
_journal_date_recd_electronic          ?
_journal_date_to_coeditor              ?
_journal_date_from_coeditor            ?
_journal_date_accepted                 ?
_journal_date_printers_first           ?
_journal_date_printers_final           ?
_journal_date_proofs_out               ?
_journal_date_proofs_in                ?
_journal_coeditor_name                 ?
_journal_coeditor_code                 ?
_journal_coeditor_notes
; ?
;
_journal_techeditor_code               ?
_journal_techeditor_notes
; ?
;
_journal_coden_ASTM                    ?
_journal_name_full                     ?
_journal_year                          ?
_journal_volume                        ?
_journal_issue                         ?
_journal_page_first                    ?
_journal_page_last                     ?
_journal_suppl_publ_number             ?
_journal_suppl_publ_pages              ?
 
#=======================================================================
 
# 1. SUBMISSION DETAILS
#----------------------
 
_publ_contact_author_name
     'Skelton, B. W.'
_publ_contact_author_address
;
   Department of Chemistry
   University of Western Australia
   Nedlands
   Western Australia 6907
   Australia
;
_publ_contact_author_email            bws@crystal.uwa.edu.au
_publ_contact_author_fax               (+61)_08_9380_1118
_publ_contact_author_phone             (+61)_08-9380_3481
 
_publ_contact_letter
;    ?                                      #<< contact letter
;
 
_publ_requested_journal   'Inorg.Chem.' 
_publ_requested_category    ?
 
_publ_section_title
;    ?                                      #<< paper title text
;
_publ_section_title_footnote
;    ?                                      #<< paper footnote text
;
 
loop_
_publ_author_name
_publ_author_footnote
_publ_author_address
 
 
'Skelton, Brian W.' .
; Department of Chemistry.
University of Western Australia,
Nedlands,
WA 6907
Australia.
;
 
 
_publ_section_synopsis
;    ?                                     #<< synopsis if FI,CI,CM,CO papers
;
_publ_section_abstract
;    ?                                     #<< abstract text
;
_publ_section_comment
;    ?                                     #<< scientific commentary text
;
 
_publ_section_exptl_prep
;    ?                        #<< material & crystal preparation text
;
 
_publ_section_exptl_refinement
;    ?                        #<< crystallographic methods used
;
 
_publ_section_acknowledgements
;    ?                                     #<< acknowledgements text
;
 
_publ_section_references
;
 Sheldrick, G M. (1996). SADABS. Pogram for Empirical Absorption Correction
  of Area Detector Data.  University of Gottingen, Germany.
 
 Siemens (1995). SMART and SAINT. Area-Detector Control and Integration
 Software. Siemens Analytical X-ray Systems Inc., Madison, Wisconsin, USA.
 
 Hall, S.R., King, G.S.D., and Stewart., J.M. (1995).
 The Xtal 3.5 User's Manual.  University of Western Australia, Lamb: Perth.
;
_publ_section_figure_captions
;    ?                                     #<< figure captions
;
 
 
#=======================================================================
#  Data block for single structure (one for each study in the paper)
#=======================================================================
 
 
data_s4py
 
 
# 2. EXPERIMENTAL DATA
#---------------------
 
 
_chemical_formula_sum                 'C45 H53 N1 O4 S4'
_chemical_formula_moiety               ?
_chemical_formula_weight               800.19
_chemical_melting_point                ?
 
_symmetry_cell_setting                 tetragonal
_symmetry_space_group_name_H-M         P_4/n:2
_symmetry_space_group_name_Hall        -p_4a
 
loop_
_symmetry_equiv_pos_as_xyz
  +x,+y,+z  1/2-x,1/2-y,+z  1/2-y,+x,+z  +y,1/2-x,+z  -x,-y,-z  1/2+x,1/2+y,-z
  1/2+y,-x,-z  -y,1/2+x,-z
 
_cell_length_a                         13.095(2)
_cell_length_b                         13.095(2)
_cell_length_c                         12.887(2)
_cell_angle_alpha                      90.00000
_cell_angle_beta                       90.00000
_cell_angle_gamma                      90.00000
_cell_volume                           2209.9(8)
_cell_formula_units_Z                  2
 
_exptl_crystal_density_diffrn          1.203
_exptl_crystal_density_meas            ?
_exptl_crystal_density_method          ?
_diffrn_radiation_type                'Mo K\a'
_diffrn_radiation_wavelength           .71073
 
_cell_measurement_reflns_used          8192
_cell_measurement_theta_min            2.8
_cell_measurement_theta_max            24.2
_cell_measurement_temperature          153
 
_exptl_absorpt_coefficient_mu          .256
_exptl_crystal_description             prism
_exptl_crystal_size_max                .35
_exptl_crystal_size_mid                .35
_exptl_crystal_size_min                .22
_exptl_crystal_size_rad                ?
_exptl_crystal_colour                  colourless
 
_diffrn_measurement_device_type
;
Bruker SMART CCD diffractometer
;
_diffrn_measurement_method             '\w scans'
_diffrn_detector_area_resol_mean       ?
 
_exptl_absorpt_correction_type         none           
_exptl_absorpt_process_details
;
 ?                           
;
_exptl_absorpt_correction_T_min        ?
_exptl_absorpt_correction_T_max        ?
 
_diffrn_reflns_number                  25540
_reflns_number_total                   2865
_reflns_Friedel_coverage               0
_reflns_number_gt                      2261
_reflns_threshold_expression          'F    > 4.00 sig(F   )'
 
_diffrn_reflns_theta_max               29.04
_diffrn_reflns_theta_full              ?
_diffrn_measured_fraction_theta_max    ?
_diffrn_measured_fraction_theta_full   ?
_diffrn_reflns_av_R_equivalents        .058
_diffrn_reflns_limit_h_min             -12
_diffrn_reflns_limit_h_max             12
_diffrn_reflns_limit_k_min             0
_diffrn_reflns_limit_k_max             17
_diffrn_reflns_limit_l_min             0
_diffrn_reflns_limit_l_max             17
_diffrn_standards_number               ?
_diffrn_standards_interval_count       ?
_diffrn_standards_interval_time        ?            #<< do not append units
_diffrn_standards_decay_%              0            #<< do not append %
 
 
_refine_ls_structure_factor_coef       F
_refine_ls_R_factor_gt                 .047
_refine_ls_wR_factor_ref               .054
_refine_ls_goodness_of_fit_ref         1.283
_refine_ls_number_reflns               2261
_refine_ls_number_parameters           209
_refine_ls_weighting_scheme            calc
_refine_ls_weighting_details           ?
_refine_ls_hydrogen_treatment          mixed
_refine_ls_shift/su_max                .018
_refine_diff_density_min               -.362
_refine_diff_density_max               .506
 
_refine_ls_extinction_method           ?
_refine_ls_extinction_coef             ?      
_refine_ls_abs_structure_details       ?
_refine_ls_abs_structure_Flack         ?
 
 
# 3. Information for the "methods" section
#-----------------------------------------
 
_computing_data_collection             'Siemens SMART (Siemens, 1995)'
_computing_cell_refinement             'Siemens SAINT (Siemens, 1995)'
_computing_data_reduction             'xtal ADDREF SORTRF'
_computing_structure_solution          xtal
_computing_structure_refinement       'xtal CRYLSQ'
_computing_molecular_graphics          xtal
_computing_publication_material       'xtal BONDLA CIFIO'
 
 
# 4. Supplementary data for validation and tables
#------------------------------------------------
 
loop_
_atom_type_symbol
_atom_type_description
_atom_type_oxidation_number
_atom_type_number_in_cell
_atom_type_scat_dispersion_real
_atom_type_scat_dispersion_imag
_atom_type_scat_source
  C  ?  0  90  .002  .002  'Int Tables Vol IV Tables 2.2B and 2.3.1'
  H  ?  0  106  0  0  'Int Tables Vol IV Tables 2.2B and 2.3.1'
  N  ?  0  2  .004  .003  'Int Tables Vol IV Tables 2.2B and 2.3.1'
  O  ?  0  8  .008  .006  'Int Tables Vol IV Tables 2.2B and 2.3.1'
  S  ?  0  8  .11  .124  'Int Tables Vol IV Tables 2.2B and 2.3.1'
 
loop_
_atom_site_label
_atom_site_fract_x
_atom_site_fract_y
_atom_site_fract_z
_atom_site_U_iso_or_equiv
_atom_site_adp_type
_atom_site_calc_flag
_atom_site_calc_attached_atom
_atom_site_occupancy
_atom_site_disorder_assembly
_atom_site_disorder_group
  O1  .31829(11)  .38417(11)  .46088(12)  .0318(7)  Uani  ?  ?  1.00000  ?  ?
  C1  .34661(13)  .43672(13)  .54720(14)  .0245(8)  Uani  ?  ?  1.00000  ?  ?
  C2  .27904(13)  .50706(13)  .59224(15)  .0258(8)  Uani  ?  ?  1.00000  ?  ?
  C3  .30876(14)  .56263(14)  .67875(16)  .0294(9)  Uani  ?  ?  1.00000  ?  ?
  C4  .40496(15)  .55123(15)  .72415(16)  .0313(10)  Uani  ?  ?  1.00000  ?  ?
  C41  .43497(18)  .61726(19)  .8173(2)  .0444(13)  Uani  ?  ?  1.00000  ?  ?
  C42  .5395(3)  .5929(4)  .8582(4)  .072(3)  Uani  ?  ?  .816(6)  ?  ?
  C43  .3555(3)  .6005(3)  .9057(3)  .058(2)  Uani  ?  ?  .816(6)  ?  ?
  C44  .4302(3)  .7296(3)  .7847(3)  .056(2)  Uani  ?  ?  .816(6)  ?  ?
  C42'  .471(2)  .5497(16)  .9033(13)  .082(14)  Uani  ?  ?  .184(6)  ?  ?
  C43'  .3719(16)  .7049(18)  .8422(17)  .083(14)  Uani  ?  ?  .184(6)  ?  ?
  C44'  .5501(12)  .6743(13)  .7813(12)  .055(9)  Uani  ?  ?  .184(6)  ?  ?
  C5  .47091(14)  .48053(14)  .67899(16)  .0297(9)  Uani  ?  ?  1.00000  ?  ?
  C6  .44307(13)  .42345(13)  .59218(15)  .0264(9)  Uani  ?  ?  1.00000  ?  ?
  S  .53400(3)  .34067(3)  .53238(4)  .0285(2)  Uani  ?  ?  1.00000  ?  ?
  N01  .25000  .25000  .7724(8)  .175(8)  Uani  ?  ?  1.00000  ?  ?
  C02  .2373(12)  .3375(8)  .8289(9)  .148(10)  Uani  ?  ?  .50000  ?  ?
  C03  .2399(10)  .3376(5)  .9254(8)  .121(7)  Uani  ?  ?  .50000  ?  ?
  C04  .25000  .25000  .9733(5)  .105(4)  Uani  ?  ?  1.00000  ?  ?
  H1  .347(4)  .336(4)  .448(4)  .17(2)  Uiso  ?  ?  1.00000  ?  ?
  H3  .2599(18)  .6098(17)  .7051(18)  .036(6)  Uiso  ?  ?  1.00000  ?  ?
  H42a  .557(3)  .631(3)  .918(4)  .086(13)  Uiso  ?  ?  .816(6)  ?  ?
  H42b  .592(4)  .608(4)  .803(4)  .090(15)  Uiso  ?  ?  .816(6)  ?  ?
  H42c  .542(3)  .513(4)  .885(3)  .080(14)  Uiso  ?  ?  .816(6)  ?  ?
  H43a  .380(3)  .644(3)  .970(3)  .071(11)  Uiso  ?  ?  .816(6)  ?  ?
  H43b  .354(3)  .528(3)  .925(3)  .056(10)  Uiso  ?  ?  .816(6)  ?  ?
  H43c  .286(3)  .620(2)  .880(3)  .052(9)  Uiso  ?  ?  .816(6)  ?  ?
  H44a  .451(3)  .776(3)  .847(3)  .067(11)  Uiso  ?  ?  .816(6)  ?  ?
  H44b  .355(3)  .747(3)  .763(3)  .069(11)  Uiso  ?  ?  .816(6)  ?  ?
  H44c  .482(3)  .745(3)  .725(3)  .061(10)  Uiso  ?  ?  .816(6)  ?  ?
  H42'a  .50615  .58046  .95970  .15300  Uiso  ?  ?  .184(6)  ?  ?
  H42'b  .54605  .51218  .87007  .09000  Uiso  ?  ?  .184(6)  ?  ?
  H42'c  .44004  .49062  .91914  .15300  Uiso  ?  ?  .184(6)  ?  ?
  H43'a  .40513  .75241  .88934  .18500  Uiso  ?  ?  .184(6)  ?  ?
  H43'b  .30878  .70627  .83730  .18500  Uiso  ?  ?  .184(6)  ?  ?
  H43'c  .39149  .75919  .76995  .07400  Uiso  ?  ?  .184(6)  ?  ?
  H44'a  .57775  .71305  .83311  .21000  Uiso  ?  ?  .184(6)  ?  ?
  H44'b  .54228  .71120  .71827  .21000  Uiso  ?  ?  .184(6)  ?  ?
  H44'c  .59971  .61815  .76460  .21000  Uiso  ?  ?  .184(6)  ?  ?
  H5  .5388(17)  .4680(17)  .7050(17)  .033(6)  Uiso  ?  ?  1.00000  ?  ?
  H02  .23277  .40165  .79187  .19100  Uiso  ?  ?  .50000  ?  ?
  H03  .22799  .39957  .96133  .15100  Uiso  ?  ?  .50000  ?  ?
  H04  .25000  .25001  1.04761  .12600  Uiso  ?  ?  1.00000  ?  ?
 
loop_
_atom_site_aniso_label
_atom_site_aniso_U_11
_atom_site_aniso_U_22
_atom_site_aniso_U_33
_atom_site_aniso_U_12
_atom_site_aniso_U_13
_atom_site_aniso_U_23
  O1  .0297(7)  .0307(7)  .0349(7)  .0010(5)  -.0007(6)  -.0039(6)
  C1  .0230(8)  .0208(8)  .0298(9)  -.0031(6)  .0028(7)  .0033(7)
  C2  .0214(8)  .0216(8)  .0344(9)  -.0003(6)  .0011(7)  .0048(7)
  C3  .0269(9)  .0263(9)  .0351(10)  .0032(7)  .0038(8)  -.0004(8)
  C4  .0301(9)  .0298(9)  .0338(10)  .0011(7)  -.0014(8)  -.0027(8)
  C41  .0421(12)  .0467(12)  .0443(13)  .0076(10)  -.0076(10)  -.0151(10)
  C42  .050(2)  .093(4)  .072(3)  .019(2)  -.026(2)  -.043(3)
  C43  .062(2)  .071(3)  .0400(17)  .0019(18)  .0001(16)  -.0146(17)
  C44  .058(2)  .0434(17)  .066(2)  -.0071(15)  -.002(2)  -.0211(16)
  C42'  .14(2)  .077(12)  .035(8)  -.023(13)  -.029(11)  .001(8)
  C43'  .066(12)  .106(16)  .077(14)  .037(12)  -.025(11)  -.055(13)
  C44'  .055(9)  .057(9)  .053(9)  -.020(7)  -.000(7)  -.014(7)
  C5  .0238(9)  .0281(9)  .0372(10)  .0006(7)  -.0018(8)  .0016(8)
  C6  .0237(8)  .0209(8)  .0344(10)  -.0001(6)  .0042(7)  .0030(7)
  S  .0230(2)  .0230(2)  .0397(3)  -.00008(17)  .00734(18)  .0021(2)
  N01  .229(9)  .229(9)  .068(6)  .00000  .00000  .00000
  C02  .183(11)  .117(9)  .144(10)  -.040(9)  -.052(10)  .096(8)
  C03  .209(11)  .044(4)  .110(7)  .007(5)  .077(8)  .000(4)
  C04  .137(5)  .137(5)  .040(4)  .00000  .00000  .00000
 
 
# 5. Molecular Geometry
#----------------------
 
loop_
_geom_bond_atom_site_label_1
_geom_bond_atom_site_label_2
_geom_bond_site_symmetry_1
_geom_bond_site_symmetry_2
_geom_bond_distance
_geom_bond_publ_flag                 #<< enter YES for value to be published
  O1  C1  .  .  1.360(2)  ?
  O1  H1  .  .  .75(5)  ?
  C1  C2  .  .  1.403(2)  ?
  C1  C6  .  .  1.401(2)  ?
  C2  C3  .  .  1.387(3)  ?
  C2  S  .  3  1.7824(18)  ?
  C3  C4  .  .  1.397(3)  ?
  C3  H3  .  .  .95(2)  ?
  C4  C41  .  .  1.531(3)  ?
  C4  C5  .  .  1.393(3)  ?
  C41  C42  .  .  1.501(5)  ?
  C41  C43  .  .  1.558(4)  ?
  C41  C44  .  .  1.532(4)  ?
  C41  C42'  .  .  1.50(2)  ?
  C41  C43'  .  .  1.45(2)  ?
  C41  C44'  .  .  1.746(16)  ?
  C42  C42'  .  .  1.21(3)  ?
  C42  C44'  .  .  1.462(17)  ?
  C42  H42a  .  .  .95(5)  ?
  C42  H42b  .  .  1.01(5)  ?
  C42  H42c  .  .  1.11(5)  ?
  C42  H42'a  .  .  1.389(5)  ?
  C42  H42'b  .  .  1.071(5)  ?
  C42  H44'c  .  .  1.478(5)  ?
  C43  C42'  .  .  1.66(3)  ?
  C43  C43'  .  .  1.61(2)  ?
  C43  H43a  .  .  1.05(4)  ?
  C43  H43b  .  .  .98(4)  ?
  C43  H43c  .  .  1.00(4)  ?
  C44  C43'  .  .  1.11(2)  ?
  C44  C44'  .  .  1.730(16)  ?
  C44  H44a  .  .  1.05(4)  ?
  C44  H44b  .  .  1.05(4)  ?
  C44  H44c  .  .  1.05(4)  ?
  C44  H43'a  .  .  1.420(4)  ?
  C44  H43'c  .  .  .665(4)  ?
  C42'  H42c  .  .  1.07(5)  ?
  C42'  H42'a  .  .  .95(2)  ?
  C42'  H42'b  .  .  1.17(3)  ?
  C42'  H42'c  .  .  .90(2)  ?
  C43'  H44a  .  .  1.40(4)  ?
  C43'  H44b  .  .  1.18(5)  ?
  C43'  H43'a  .  .  .97(2)  ?
  C43'  H43'b  .  .  .83(2)  ?
  C43'  H43'c  .  .  1.20(2)  ?
  C44'  H42b  .  .  1.06(5)  ?
  C44'  H44c  .  .  1.48(4)  ?
  C44'  H44'a  .  .  .914(16)  ?
  C44'  H44'b  .  .  .950(16)  ?
  C44'  H44'c  .  .  1.004(16)  ?
  C5  C6  .  .  1.394(3)  ?
  C5  H5  .  .  .96(2)  ?
  C6  S  .  .  1.7851(18)  ?
  N01  C02  .  .  1.368(12)  ?
  N01  C02  .  2  1.368(12)  ?
  N01  C02  .  3  1.368(12)  ?
  N01  C02  .  4  1.368(12)  ?
  C02  C03  .  .  1.243(15)  ?
  C02  H02  .  .  .967(11)  ?
  C02  C02  .  3  1.638(19)  ?
  C02  C02  .  4  1.638(19)  ?
  C03  C04  .  .  1.310(8)  ?
  C03  H03  .  .  .947(8)  ?
  C03  C03  .  3  1.634(15)  ?
  C03  C03  .  4  1.634(15)  ?
  C04  H04  .  .  .957(7)  ?
  H42b  H44'c  .  .  .53(5)  ?
  H42c  H42'b  .  .  .20(4)  ?
  H44a  H43'a  .  .  .87(4)  ?
  H44b  H43'c  .  .  .52(4)  ?
  H44c  H44'b  .  .  .91(4)  ?
 
loop_
_geom_angle_atom_site_label_1
_geom_angle_atom_site_label_2
_geom_angle_atom_site_label_3
_geom_angle_site_symmetry_1
_geom_angle_site_symmetry_2
_geom_angle_site_symmetry_3
_geom_angle
_geom_angle_publ_flag                #<< enter YES for value to be published
  C1  O1  H1  .  .  .  118(4)  ?
  O1  C1  C2  .  .  .  119.92(15)  ?
  O1  C1  C6  .  .  .  121.45(16)  ?
  C2  C1  C6  .  .  .  118.62(16)  ?
  C1  C2  C3  .  .  .  120.00(16)  ?
  C1  C2  S  .  .  3  120.37(14)  ?
  C3  C2  S  .  .  3  119.39(14)  ?
  C2  C3  C4  .  .  .  122.25(17)  ?
  C2  C3  H3  .  .  .  116.0(14)  ?
  C4  C3  H3  .  .  .  121.7(14)  ?
  C3  C4  C41  .  .  .  119.97(18)  ?
  C3  C4  C5  .  .  .  117.06(18)  ?
  C41  C4  C5  .  .  .  122.94(18)  ?
  C4  C41  C42  .  .  .  112.9(3)  ?
  C4  C41  C43  .  .  .  108.8(2)  ?
  C4  C41  C44  .  .  .  108.5(2)  ?
  C4  C41  C42'  .  .  .  109.2(8)  ?
  C4  C41  C43'  .  .  .  118.3(9)  ?
  C4  C41  C44'  .  .  .  104.8(5)  ?
  C42  C41  C43  .  .  .  108.8(3)  ?
  C42  C41  C44  .  .  .  109.8(3)  ?
  C42  C41  C42'  .  .  .  47.4(11)  ?
  C42  C41  C43'  .  .  .  127.6(9)  ?
  C42  C41  C44'  .  .  .  52.9(6)  ?
  C43  C41  C44  .  .  .  107.9(3)  ?
  C43  C41  C42'  .  .  .  65.7(11)  ?
  C43  C41  C43'  .  .  .  64.5(9)  ?
  C43  C41  C44'  .  .  .  146.2(6)  ?
  C44  C41  C42'  .  .  .  141.7(8)  ?
  C44  C41  C43'  .  .  .  43.7(9)  ?
  C44  C41  C44'  .  .  .  63.3(6)  ?
  C42'  C41  C43'  .  .  .  119.1(12)  ?
  C42'  C41  C44'  .  .  .  100.1(12)  ?
  C43'  C41  C44'  .  .  .  102.2(10)  ?
  C41  C42  C42'  .  .  .  66.1(12)  ?
  C41  C42  C44'  .  .  .  72.2(7)  ?
  C41  C42  H42a  .  .  .  113(3)  ?
  C41  C42  H42b  .  .  .  110(3)  ?
  C41  C42  H42c  .  .  .  110(2)  ?
  C41  C42  H42'a  .  .  .  93.9(3)  ?
  C41  C42  H42'b  .  .  .  109.5(4)  ?
  C41  C42  H44'c  .  .  .  98.8(3)  ?
  C42'  C42  C44'  .  .  .  137.7(14)  ?
  C42'  C42  H42a  .  .  .  92(3)  ?
  C42'  C42  H42b  .  .  .  160(3)  ?
  C42'  C42  H42c  .  .  .  55(3)  ?
  C42'  C42  H42'a  .  .  .  42.1(9)  ?
  C42'  C42  H42'b  .  .  .  61.8(11)  ?
  C42'  C42  H44'c  .  .  .  153.3(10)  ?
  C44'  C42  H42a  .  .  .  99(3)  ?
  C44'  C42  H42b  .  .  .  47(3)  ?
  C44'  C42  H42c  .  .  .  155(2)  ?
  C44'  C42  H42'a  .  .  .  138.9(7)  ?
  C44'  C42  H42'b  .  .  .  144.0(8)  ?
  C44'  C42  H44'c  .  .  .  39.9(6)  ?
  H42a  C42  H42b  .  .  .  108(4)  ?
  H42a  C42  H42c  .  .  .  103(4)  ?
  H42a  C42  H42'a  .  .  .  51(3)  ?
  H42a  C42  H42'b  .  .  .  112(3)  ?
  H42a  C42  H44'c  .  .  .  115(3)  ?
  H42b  C42  H42c  .  .  .  113(4)  ?
  H42b  C42  H42'a  .  .  .  154(3)  ?
  H42b  C42  H42'b  .  .  .  104(3)  ?
  H42b  C42  H44'c  .  .  .  11(3)  ?
  H42c  C42  H42'a  .  .  .  66(2)  ?
  H42c  C42  H42'b  .  .  .  11(2)  ?
  H42c  C42  H44'c  .  .  .  117(2)  ?
  H42'a  C42  H42'b  .  .  .  77.0(3)  ?
  H42'a  C42  H44'c  .  .  .  164.2(4)  ?
  H42'b  C42  H44'c  .  .  .  107.2(4)  ?
  C41  C43  C42'  .  .  .  55.4(7)  ?
  C41  C43  C43'  .  .  .  54.5(8)  ?
  C41  C43  H43a  .  .  .  108(2)  ?
  C41  C43  H43b  .  .  .  109(2)  ?
  C41  C43  H43c  .  .  .  109(2)  ?
  C42'  C43  C43'  .  .  .  102.1(11)  ?
  C42'  C43  H43a  .  .  .  87(2)  ?
  C42'  C43  H43b  .  .  .  68(2)  ?
  C42'  C43  H43c  .  .  .  158(2)  ?
  C43'  C43  H43a  .  .  .  85(2)  ?
  C43'  C43  H43b  .  .  .  162(2)  ?
  C43'  C43  H43c  .  .  .  75(2)  ?
  H43a  C43  H43b  .  .  .  109(3)  ?
  H43a  C43  H43c  .  .  .  113(3)  ?
  H43b  C43  H43c  .  .  .  108(3)  ?
  C41  C44  C43'  .  .  .  64.3(12)  ?
  C41  C44  C44'  .  .  .  64.4(6)  ?
  C41  C44  H44a  .  .  .  110(2)  ?
  C41  C44  H44b  .  .  .  109(2)  ?
  C41  C44  H44c  .  .  .  111(2)  ?
  C41  C44  H43'a  .  .  .  87.2(2)  ?
  C41  C44  H43'c  .  .  .  132.0(5)  ?
  C43'  C44  C44'  .  .  .  121.2(13)  ?
  C43'  C44  H44a  .  .  .  81(2)  ?
  C43'  C44  H44b  .  .  .  66(2)  ?
  C43'  C44  H44c  .  .  .  173(2)  ?
  C43'  C44  H43'a  .  .  .  43.1(12)  ?
  C43'  C44  H43'c  .  .  .  80.6(12)  ?
  C44'  C44  H44a  .  .  .  91(2)  ?
  C44'  C44  H44b  .  .  .  159(2)  ?
  C44'  C44  H44c  .  .  .  58(2)  ?
  C44'  C44  H43'a  .  .  .  108.8(6)  ?
  C44'  C44  H43'c  .  .  .  158.1(7)  ?
  H44a  C44  H44b  .  .  .  109(3)  ?
  H44a  C44  H44c  .  .  .  107(3)  ?
  H44a  C44  H43'a  .  .  .  38(2)  ?
  H44a  C44  H43'c  .  .  .  95(2)  ?
  H44b  C44  H44c  .  .  .  111(3)  ?
  H44b  C44  H43'a  .  .  .  90(2)  ?
  H44b  C44  H43'c  .  .  .  24(2)  ?
  H44c  C44  H43'a  .  .  .  144(2)  ?
  H44c  C44  H43'c  .  .  .  100(2)  ?
  H43'a  C44  H43'c  .  .  .  88.5(4)  ?
  C41  C42'  C42  .  .  .  66.5(9)  ?
  C41  C42'  C43  .  .  .  58.9(10)  ?
  C41  C42'  H42c  .  .  .  113(3)  ?
  C41  C42'  H42'a  .  .  .  118.0(18)  ?
  C41  C42'  H42'b  .  .  .  104.0(13)  ?
  C41  C42'  H42'c  .  .  .  122(2)  ?
  C42  C42'  C43  .  .  .  119.8(15)  ?
  C42  C42'  H42c  .  .  .  58(3)  ?
  C42  C42'  H42'a  .  .  .  79(2)  ?
  C42  C42'  H42'b  .  .  .  53.5(12)  ?
  C42  C42'  H42'c  .  .  .  148(2)  ?
  C43  C42'  H42c  .  .  .  168(3)  ?
  C43  C42'  H42'a  .  .  .  104.8(18)  ?
  C43  C42'  H42'b  .  .  .  159.4(15)  ?
  C43  C42'  H42'c  .  .  .  86(2)  ?
  H42c  C42'  H42'a  .  .  .  87(3)  ?
  H42c  C42'  H42'b  .  .  .  9(2)  ?
  H42c  C42'  H42'c  .  .  .  93(3)  ?
  H42'a  C42'  H42'b  .  .  .  93(2)  ?
  H42'a  C42'  H42'c  .  .  .  114.3(18)  ?
  H42'b  C42'  H42'c  .  .  .  95.9(19)  ?
  C41  C43'  C43  .  .  .  61.0(9)  ?
  C41  C43'  C44  .  .  .  72.1(12)  ?
  C41  C43'  H44a  .  .  .  97(2)  ?
  C41  C43'  H44b  .  .  .  106(2)  ?
  C41  C43'  H43'a  .  .  .  112.9(18)  ?
  C41  C43'  H43'b  .  .  .  125(2)  ?
  C41  C43'  H43'c  .  .  .  100.1(15)  ?
  C43  C43'  C44  .  .  .  132.7(18)  ?
  C43  C43'  H44a  .  .  .  130(2)  ?
  C43  C43'  H44b  .  .  .  144(3)  ?
  C43  C43'  H43'a  .  .  .  106.6(17)  ?
  C43  C43'  H43'b  .  .  .  85.6(17)  ?
  C43  C43'  H43'c  .  .  .  158(2)  ?
  C44  C43'  H44a  .  .  .  47.7(18)  ?
  C44  C43'  H44b  .  .  .  54(2)  ?
  C44  C43'  H43'a  .  .  .  85.6(17)  ?
  C44  C43'  H43'b  .  .  .  129(2)  ?
  C44  C43'  H43'c  .  .  .  33.2(7)  ?
  H44a  C43'  H44b  .  .  .  83(3)  ?
  H44a  C43'  H43'a  .  .  .  38.0(18)  ?
  H44a  C43'  H43'b  .  .  .  137(3)  ?
  H44a  C43'  H43'c  .  .  .  58.8(18)  ?
  H44b  C43'  H43'a  .  .  .  109(3)  ?
  H44b  C43'  H43'b  .  .  .  75(3)  ?
  H44b  C43'  H43'c  .  .  .  25(2)  ?
  H43'a  C43'  H43'b  .  .  .  119(3)  ?
  H43'a  C43'  H43'c  .  .  .  90.6(18)  ?
  H43'b  C43'  H43'c  .  .  .  98(2)  ?
  C41  C44'  C42  .  .  .  54.9(6)  ?
  C41  C44'  C44  .  .  .  52.3(5)  ?
  C41  C44'  H42b  .  .  .  92(3)  ?
  C41  C44'  H44c  .  .  .  82.8(16)  ?
  C41  C44'  H44'a  .  .  .  112.7(13)  ?
  C41  C44'  H44'b  .  .  .  110.6(12)  ?
  C41  C44'  H44'c  .  .  .  107.6(12)  ?
  C42  C44'  C44  .  .  .  101.6(9)  ?
  C42  C44'  H42b  .  .  .  44(3)  ?
  C42  C44'  H44c  .  .  .  137.0(18)  ?
  C42  C44'  H44'a  .  .  .  87.0(12)  ?
  C42  C44'  H44'b  .  .  .  159.9(16)  ?
  C42  C44'  H44'c  .  .  .  70.9(10)  ?
  C44  C44'  H42b  .  .  .  143(3)  ?
  C44  C44'  H44c  .  .  .  37.0(15)  ?
  C44  C44'  H44'a  .  .  .  96.2(12)  ?
  C44  C44'  H44'b  .  .  .  73.2(10)  ?
  C44  C44'  H44'c  .  .  .  154.0(14)  ?
  H42b  C44'  H44c  .  .  .  162(3)  ?
  H42b  C44'  H44'a  .  .  .  93(3)  ?
  H42b  C44'  H44'b  .  .  .  134(3)  ?
  H42b  C44'  H44'c  .  .  .  29(3)  ?
  H44c  C44'  H44'a  .  .  .  105(2)  ?
  H44c  C44'  H44'b  .  .  .  36.5(16)  ?
  H44c  C44'  H44'c  .  .  .  138(2)  ?
  H44'a  C44'  H44'b  .  .  .  112.7(17)  ?
  H44'a  C44'  H44'c  .  .  .  107.9(15)  ?
  H44'b  C44'  H44'c  .  .  .  105.0(15)  ?
  C4  C5  C6  .  .  .  121.96(18)  ?
  C4  C5  H5  .  .  .  122.7(13)  ?
  C6  C5  H5  .  .  .  115.4(13)  ?
  C1  C6  C5  .  .  .  120.10(16)  ?
  C1  C6  S  .  .  .  119.88(14)  ?
  C5  C6  S  .  .  .  119.84(14)  ?
  C6  S  C2  .  .  4  102.43(9)  ?
  C02  N01  C02  .  .  2  115.7(10)  ?
  C02  N01  C02  .  .  3  73.5(9)  ?
  C02  N01  C02  .  .  4  73.5(9)  ?
  C02  N01  C02  2  .  3  73.5(9)  ?
  C02  N01  C02  2  .  4  73.5(9)  ?
  C02  N01  C02  3  .  4  115.7(10)  ?
  N01  C02  C03  .  .  .  122.0(10)  ?
  N01  C02  H02  .  .  .  118.1(11)  ?
  N01  C02  C02  .  .  3  53.2(6)  ?
  N01  C02  C02  .  .  4  53.2(7)  ?
  C03  C02  H02  .  .  .  119.6(11)  ?
  C03  C02  C02  .  .  3  91.0(9)  ?
  C03  C02  C02  .  .  4  88.8(10)  ?
  H02  C02  C02  .  .  3  131.2(13)  ?
  H02  C02  C02  .  .  4  124.7(13)  ?
  C02  C02  C02  3  .  4  90.0(8)  ?
  C02  C03  C04  .  .  .  118.3(8)  ?
  C02  C03  H03  .  .  .  119.0(9)  ?
  C02  C03  C03  .  .  3  89.0(9)  ?
  C02  C03  C03  .  .  4  91.2(10)  ?
  C04  C03  H03  .  .  .  122.4(9)  ?
  C04  C03  C03  .  .  3  51.4(5)  ?
  C04  C03  C03  .  .  4  51.4(5)  ?
  H03  C03  C03  .  .  3  124.7(11)  ?
  H03  C03  C03  .  .  4  131.4(11)  ?
  C03  C03  C03  3  .  4  90.0(6)  ?
  C03  C04  H04  .  .  .  118.1(5)  ?
  C03  C04  C03  .  .  2  123.7(8)  ?
  C03  C04  C03  .  .  3  77.1(8)  ?
  C03  C04  C03  .  .  4  77.1(8)  ?
  H04  C04  C03  .  .  2  118.2(5)  ?
  H04  C04  C03  .  .  3  118.2(5)  ?
  H04  C04  C03  .  .  4  118.2(5)  ?
  C03  C04  C03  2  .  3  77.1(8)  ?
  C03  C04  C03  2  .  4  77.1(8)  ?
  C03  C04  C03  3  .  4  123.7(8)  ?
  C42  H42b  C44'  .  .  .  90(4)  ?
  C42  H42b  H44'c  .  .  .  148(8)  ?
  C44'  H42b  H44'c  .  .  .  69(5)  ?
  C42  H42c  C42'  .  .  .  67(3)  ?
  C42  H42c  H42'b  .  .  .  75(13)  ?
  C42'  H42c  H42'b  .  .  .  116(14)  ?
  C44  H44a  C43'  .  .  .  51.8(19)  ?
  C44  H44a  H43'a  .  .  .  95(3)  ?
  C43'  H44a  H43'a  .  .  .  44(2)  ?
  C44  H44b  C43'  .  .  .  59(2)  ?
  C44  H44b  H43'c  .  .  .  31(3)  ?
  C43'  H44b  H43'c  .  .  .  79(5)  ?
  C44  H44c  C44'  .  .  .  85(2)  ?
  C44  H44c  H44'b  .  .  .  122(4)  ?
  C44'  H44c  H44'b  .  .  .  38.2(16)  ?
  C42  H42'a  C42'  .  .  .  58.6(15)  ?
  C42  H42'b  C42'  .  .  .  64.8(11)  ?
  C42  H42'b  H42c  .  .  .  95(13)  ?
  C42'  H42'b  H42c  .  .  .  55(13)  ?
  C44  H43'a  C43'  .  .  .  51.3(13)  ?
  C44  H43'a  H44a  .  .  .  47(2)  ?
  C43'  H43'a  H44a  .  .  .  98(3)  ?
  C44  H43'c  C43'  .  .  .  66.2(11)  ?
  C44  H43'c  H44b  .  .  .  125(4)  ?
  C43'  H43'c  H44b  .  .  .  76(4)  ?
  C44'  H44'b  H44c  .  .  .  105(3)  ?
  C42  H44'c  C44'  .  .  .  69.2(9)  ?
  C42  H44'c  H42b  .  .  .  21(5)  ?
  C44'  H44'c  H42b  .  .  .  82(5)  ?
 
loop_
_geom_torsion_atom_site_label_1
_geom_torsion_atom_site_label_2
_geom_torsion_atom_site_label_3
_geom_torsion_atom_site_label_4
_geom_torsion_site_symmetry_1
_geom_torsion_site_symmetry_2
_geom_torsion_site_symmetry_3
_geom_torsion_site_symmetry_4
_geom_torsion
_geom_torsion_publ_flag              #<< enter YES for value to be published
     ?  ?  ?  ?  ?  ?  ?  ?  ?  ?
 
loop_
_geom_hbond_atom_site_label_D
_geom_hbond_atom_site_label_H
_geom_hbond_atom_site_label_A
_geom_hbond_site_symmetry_D
_geom_hbond_site_symmetry_H
_geom_hbond_site_symmetry_A
_geom_hbond_distance_DH
_geom_hbond_distance_HA
_geom_hbond_distance_DA
_geom_hbond_angle_DHA
_geom_hbond_publ_flag               #<< enter YES for value to be published
      ?  ?  ?  ?  ?  ?  ?  ?  ?  ?  ?
 
 
#--------------------------------------------------------------------------
#      Special items requested by author for inclusion in paper
#--------------------------------------------------------------------------
 
loop_
_publ_manuscript_incl_extra_item
_publ_manuscript_incl_extra_defn
                       ?  ?
 
#--------------------------------------------------------------------------
#       Items which are non-mandatory for Acta C submissions
#--------------------------------------------------------------------------
 
loop_
_geom_contact_atom_site_label_1
_geom_contact_atom_site_label_2
_geom_contact_distance
_geom_contact_site_symmetry_1
_geom_contact_site_symmetry_2
_geom_contact_publ_flag
  O1  O1  2.788(2)  .  4  ?
  O1  O1  2.788(2)  .  3  ?
  O1  O1  3.943(2)  .  2  ?
  O1  C1  3.574(2)  .  4  ?
  O1  C1  3.554(2)  .  3  ?
  O1  C2  2.392(2)  .  .  ?
  O1  C2  3.680(2)  .  4  ?
  O1  C3  3.655(2)  .  .  ?
  O1  C44'  3.646(16)  .  '5 666'  ?
  O1  C5  3.672(2)  .  .  ?
  O1  C6  2.408(2)  .  .  ?
  O1  C6  3.671(2)  .  3  ?
  O1  S  3.0053(15)  .  3  ?
  O1  S  3.0253(15)  .  .  ?
  O1  H1  3.03(6)  .  4  ?
  O1  H1  2.08(5)  .  3  ?
  O1  H44c  3.12(4)  .  '7 466'  ?
  O1  H44'b  3.1974(15)  .  '5 666'  ?
  O1  H44'b  2.8678(15)  .  '7 466'  ?
  O1  H44'c  3.0979(15)  .  '5 666'  ?
  C1  C3  2.416(3)  .  .  ?
  C1  C4  2.834(3)  .  .  ?
  C1  C5  2.421(3)  .  .  ?
  C1  S  2.7641(18)  .  .  ?
  C1  S  2.7701(18)  .  3  ?
  C1  H1  1.84(5)  .  .  ?
  C2  C4  2.438(3)  .  .  ?
  C2  C5  2.772(3)  .  .  ?
  C2  C6  2.411(2)  .  .  ?
  C2  C6  2.781(2)  .  3  ?
  C2  H3  2.00(2)  .  .  ?
  C3  C41  2.536(3)  .  .  ?
  C3  C43'  2.93(2)  .  .  ?
  C3  C5  2.380(3)  .  .  ?
  C3  C6  2.768(3)  .  .  ?
  C3  S  2.744(2)  .  3  ?
  C4  C42  2.526(5)  .  .  ?
  C4  C43  2.512(4)  .  .  ?
  C4  C44  2.485(4)  .  .  ?
  C4  C42'  2.47(2)  .  .  ?
  C4  C43'  2.56(2)  .  .  ?
  C4  C44'  2.599(16)  .  .  ?
  C4  C6  2.437(3)  .  .  ?
  C4  H3  2.06(2)  .  .  ?
  C4  H43b  2.69(3)  .  .  ?
  C4  H43c  2.70(3)  .  .  ?
  C4  H44b  2.69(4)  .  .  ?
  C4  H42'b  2.685(2)  .  .  ?
  C4  H42'c  2.675(2)  .  .  ?
  C4  H5  2.08(2)  .  .  ?
  C41  C5  2.570(3)  .  .  ?
  C41  H42a  2.07(4)  .  .  ?
  C41  H42b  2.07(5)  .  .  ?
  C41  H42c  2.15(5)  .  .  ?
  C41  H43a  2.13(4)  .  .  ?
  C41  H43b  2.10(4)  .  .  ?
  C41  H43c  2.11(4)  .  .  ?
  C41  H44a  2.13(4)  .  .  ?
  C41  H44b  2.12(4)  .  .  ?
  C41  H44c  2.14(4)  .  .  ?
  C41  H42'a  2.114(3)  .  .  ?
  C41  H42'b  2.115(2)  .  .  ?
  C41  H42'c  2.116(3)  .  .  ?
  C41  H43'a  2.036(2)  .  .  ?
  C41  H43'b  2.039(2)  .  .  ?
  C41  H43'c  2.037(2)  .  .  ?
  C41  H44'a  2.261(2)  .  .  ?
  C41  H44'b  2.262(2)  .  .  ?
  C41  H44'c  2.262(2)  .  .  ?
  C42  C43  2.488(6)  .  .  ?
  C42  C44  2.481(6)  .  .  ?
  C42  C43'  2.65(2)  .  .  ?
  C42  C5  2.881(5)  .  .  ?
  C42  H43a  2.63(4)  .  .  ?
  C42  H44a  2.67(4)  .  .  ?
  C42  H42'c  2.027(5)  .  .  ?
  C42  H44'a  1.683(5)  .  .  ?
  C42  H44'b  2.377(5)  .  .  ?
  C42  H5  2.56(2)  .  .  ?
  C43  C44  2.499(6)  .  .  ?
  C43  H42a  2.67(4)  .  .  ?
  C43  H44b  2.66(4)  .  .  ?
  C43  H42'a  2.109(4)  .  .  ?
  C43  H42'c  1.824(4)  .  .  ?
  C43  H43'a  2.103(4)  .  .  ?
  C43  H43'b  1.751(4)  .  .  ?
  C44  C42'  2.86(2)  .  .  ?
  C44  H42b  2.66(5)  .  .  ?
  C44  H43c  2.67(3)  .  .  ?
  C44  H43'b  1.755(4)  .  .  ?
  C44  H44'a  2.043(4)  .  .  ?
  C44  H44'b  1.716(4)  .  .  ?
  C44  H44'c  2.670(4)  .  .  ?
  C42'  C42'  2.91(3)  .  '5 667'  ?
  C42'  C43'  2.54(3)  .  .  ?
  C42'  C44'  2.49(3)  .  .  ?
  C42'  H42a  1.56(5)  .  .  ?
  C42'  H42b  2.18(5)  .  .  ?
  C42'  H43a  1.92(5)  .  .  ?
  C42'  H43b  1.58(4)  .  .  ?
  C42'  H43c  2.61(5)  .  .  ?
  C42'  H42'a  2.47(2)  .  '5 667'  ?
  C42'  H42'c  2.62(2)  .  '5 667'  ?
  C42'  H44'c  2.61(2)  .  .  ?
  C43'  C44'  2.49(3)  .  .  ?
  C43'  H3  2.61(3)  .  .  ?
  C43'  H43a  1.84(5)  .  .  ?
  C43'  H43b  2.56(4)  .  .  ?
  C43'  H43c  1.66(4)  .  .  ?
  C43'  H44c  2.15(4)  .  .  ?
  C43'  H43'b  2.64(2)  .  '2 565'  ?
  C44'  H42a  1.86(5)  .  .  ?
  C44'  H42c  2.51(5)  .  .  ?
  C44'  H44a  2.04(4)  .  .  ?
  C44'  H42'a  2.670(16)  .  .  ?
  C44'  H42'b  2.412(16)  .  .  ?
  C44'  H43'a  2.567(16)  .  .  ?
  C44'  H43'c  2.360(16)  .  .  ?
  C5  S  2.758(2)  .  .  ?
  C5  H42'b  2.684(2)  .  .  ?
  C6  H1  2.52(5)  .  .  ?
  C6  H5  2.01(2)  .  .  ?
  S  H1  2.68(6)  .  .  ?
  S  H3  2.77(2)  .  4  ?
  S  H5  2.78(2)  .  .  ?
  N01  C03  2.285(12)  .  .  ?
  N01  C03  2.285(12)  .  4  ?
  N01  C03  2.285(12)  .  3  ?
  N01  C03  2.285(12)  .  2  ?
  N01  C04  2.590(12)  .  .  ?
  N01  H02  2.0144(12)  .  2  ?
  N01  H02  2.0144(12)  .  4  ?
  N01  H02  2.0144(12)  .  .  ?
  N01  H02  2.0144(12)  .  3  ?
  C02  C02  2.317(15)  .  2  ?
  C02  C03  2.036(16)  .  3  ?
  C02  C03  2.073(16)  .  4  ?
  C02  C03  2.626(13)  .  2  ?
  C02  C04  2.192(13)  .  .  ?
  C02  H02  2.329(14)  .  3  ?
  C02  H02  2.389(15)  .  4  ?
  C02  H03  1.894(12)  .  .  ?
  C03  C03  2.310(10)  .  2  ?
  C03  H02  1.916(9)  .  .  ?
  C03  H03  2.308(13)  .  4  ?
  C03  H03  2.369(11)  .  3  ?
  C03  H04  1.953(9)  .  .  ?
  C04  H03  1.9857(6)  .  4  ?
  C04  H03  1.9857(6)  .  3  ?
  C04  H03  1.9857(6)  .  2  ?
  C04  H03  1.9857(6)  .  .  ?
  H1  H1  2.39(8)  .  3  ?
  H1  H1  2.39(8)  .  4  ?
  H3  H43c  2.29(4)  .  .  ?
  H3  H44b  2.31(4)  .  .  ?
  H3  H43'b  2.22(2)  .  .  ?
  H42a  H42b  1.58(7)  .  .  ?
  H42a  H42c  1.61(6)  .  .  ?
  H42a  H42'a  1.08(4)  .  .  ?
  H42a  H42'b  1.68(4)  .  .  ?
  H42a  H42'c  2.39(4)  .  .  ?
  H42a  H44'a  1.56(5)  .  .  ?
  H42a  H44'c  2.07(5)  .  .  ?
  H42a  H03  2.09(5)  .  '8 657'  ?
  H42b  H42c  1.76(7)  .  .  ?
  H42b  H42'a  2.34(5)  .  .  ?
  H42b  H42'b  1.64(5)  .  .  ?
  H42b  H44'a  1.44(5)  .  .  ?
  H42b  H44'b  1.86(5)  .  .  ?
  H42b  H5  2.34(5)  .  .  ?
  H42c  H42'a  1.39(5)  .  .  ?
  H42c  H42'c  1.44(4)  .  .  ?
  H42c  H44'c  2.21(5)  .  .  ?
  H42c  H5  2.40(5)  .  .  ?
  H43a  H43b  1.65(5)  .  .  ?
  H43a  H43c  1.71(5)  .  .  ?
  H43a  H42'a  1.86(4)  .  .  ?
  H43a  H42'c  2.25(4)  .  .  ?
  H43a  H43'a  1.80(4)  .  .  ?
  H43a  H43'b  2.11(4)  .  .  ?
  H43b  H43c  1.60(5)  .  .  ?
  H43b  H42'a  2.15(3)  .  .  ?
  H43b  H42'c  1.23(3)  .  .  ?
  H43c  H43'a  2.34(3)  .  .  ?
  H43c  H43'b  1.30(3)  .  .  ?
  H44a  H44b  1.71(5)  .  .  ?
  H44a  H44c  1.68(5)  .  .  ?
  H44a  H43'b  2.08(4)  .  .  ?
  H44a  H43'c  1.28(4)  .  .  ?
  H44a  H44'a  1.86(4)  .  .  ?
  H44a  H44'b  2.21(4)  .  .  ?
  H44b  H44c  1.73(5)  .  .  ?
  H44b  H43'a  1.76(4)  .  .  ?
  H44b  H43'b  1.25(4)  .  .  ?
  H44c  H43'a  2.35(4)  .  .  ?
  H44c  H43'c  1.33(4)  .  .  ?
  H44c  H44'a  1.93(4)  .  .  ?
  H44c  H44'c  2.33(4)  .  .  ?
  H42'a  H42'a  2.3548(3)  .  '5 667'  ?
  H42'a  H42'b  1.55133(16)  .  .  ?
  H42'a  H42'c  1.55136(16)  .  .  ?
  H42'a  H42'c  1.9496(2)  .  '5 667'  ?
  H42'b  H42'c  1.5514(2)  .  .  ?
  H42'b  H44'c  2.0656(2)  .  .  ?
  H42'b  H5  2.21(2)  .  .  ?
  H43'a  H43'b  1.55136(17)  .  .  ?
  H43'a  H43'c  1.5515(2)  .  .  ?
  H43'b  H43'b  1.9187(2)  .  '2 565'  ?
  H43'b  H43'c  1.55133(15)  .  .  ?
  H43'c  H44'b  2.1766(3)  .  .  ?
  H44'a  H44'b  1.5513(2)  .  .  ?
  H44'a  H44'c  1.55130(17)  .  .  ?
  H44'b  H44'c  1.55137(16)  .  .  ?
  H44'c  H5  2.26(2)  .  .  ?
  H02  H03  2.1849(3)  .  .  ?
  H03  H04  2.2705(3)  .  .  ?
 
_atom_sites_solution_primary           ?
_atom_sites_solution_secondary         ?
_atom_sites_solution_hydrogens         ?
 
_geom_special_details                  ?
 
 
_cell_special_details
;      ?
;
 
_exptl_special_details
;      ?
;
 
_diffrn_special_details
;      ?
;
 
_chemical_compound_source              ?
_chemical_name_systematic              ?
_chemical_name_common                  ?
_chemical_formula_analytical           ?
_chemical_formula_structural           ?
 
_exptl_crystal_F_000                   852
 
loop_
_diffrn_standard_refln_index_h
_diffrn_standard_refln_index_k
_diffrn_standard_refln_index_l
  ?  ?  ?
loop_
_diffrn_attenuator_code
_diffrn_attenuator_scale
  ?  ?
 
_reflns_limit_h_min                    0
_reflns_limit_h_max                    17
_reflns_limit_k_min                    0
_reflns_limit_k_max                    17
_reflns_limit_l_min                    0
_reflns_limit_l_max                    17
_reflns_number_observed                ?
_reflns_d_resolution_high              .732
_reflns_d_resolution_low               9.242
 
_diffrn_reflns_av_sigmaI/netI          .045
_diffrn_reflns_theta_min               2.2
_diffrn_reflns_reduction_process       ?
 
_diffrn_ambient_temperature            153
_diffrn_radiation_source               'sealed tube'
_diffrn_radiation_monochromator        graphite
_diffrn_radiation_detector             'CCD area detector'
 
_refine_ls_extinction_expression       ?
_refine_ls_matrix_type                 full
_refine_ls_number_restraints           0
_refine_ls_number_constraints          0
_refine_ls_R_factor_all                .063
_refine_ls_wR_factor_all               .058
_refine_ls_goodness_of_fit_all         1.209
_refine_ls_shift/su_mean               .003
 
#===END

data_global
 
_audit_creation_method                 Xtal3.6
_audit_creation_date                   99-07-07
_audit_update_record                   ?
 
#==============================================================================
#   (Publishing Staff Use Only)
 
_journal_date_recd_electronic          ?
_journal_date_to_coeditor              ?
_journal_date_from_coeditor            ?
_journal_date_accepted                 ?
_journal_date_printers_first           ?
_journal_date_printers_final           ?
_journal_date_proofs_out               ?
_journal_date_proofs_in                ?
_journal_coeditor_name                 ?
_journal_coeditor_code                 ?
_journal_coeditor_notes
; ?
;
_journal_techeditor_code               ?
_journal_techeditor_notes
; ?
;
_journal_coden_ASTM                    ?
_journal_name_full                     ?
_journal_year                          ?
_journal_volume                        ?
_journal_issue                         ?
_journal_page_first                    ?
_journal_page_last                     ?
_journal_suppl_publ_number             ?
_journal_suppl_publ_pages              ?
 
#=======================================================================
 
# 1. SUBMISSION DETAILS
#----------------------
 
_publ_contact_author_name
     'Skelton, B. W.'
_publ_contact_author_address
;
   Department of Chemistry
   University of Western Australia
   Nedlands
   Western Australia 6907
   Australia
;
_publ_contact_author_email            bws@crystal.uwa.edu.au
_publ_contact_author_fax               (+61)_08_9380_1118
_publ_contact_author_phone             (+61)_08-9380_3481
 
_publ_contact_letter
;    ?                                      #<< contact letter
;
 
_publ_requested_journal   'Inorg.Chem.'  
_publ_requested_category      ?          
 
_publ_section_title
;    ?                                      #<< paper title text
;
_publ_section_title_footnote
;    ?                                      #<< paper footnote text
;
 
loop_
_publ_author_name
_publ_author_footnote
_publ_author_address
 
 
'Skelton, Brian W.' .
; Department of Chemistry,
University of Western Australia,
Nedlands,
WA 6907
Australia.
;
 
 
 
_publ_section_synopsis
;    ?                                     #<< synopsis if FI,CI,CM,CO papers
;
_publ_section_abstract
;    ?                                     #<< abstract text
;
_publ_section_comment
;    ?                                     #<< scientific commentary text
;
 
_publ_section_exptl_prep
;    ?                        #<< material & crystal preparation text
;
 
_publ_section_exptl_refinement
;    ?                        #<< crystallographic methods used
;
 
_publ_section_acknowledgements
;    ?                                     #<< acknowledgements text
;
 
_publ_section_references
;
 Sheldrick, G M. (1996). SADABS. Pogram for Empirical Absorption Correction
  of Area Detector Data.  University of Gottingen, Germany.
 
 Siemens (1995). SMART and SAINT. Area-Detector Control and Integration
 Software. Siemens Analytical X-ray Systems Inc., Madison, Wisconsin, USA.
 
 Hall, S.R., King, G.S.D., and Stewart., J.M. (1995).
 The Xtal 3.5 User's Manual.  University of Western Australia, Lamb: Perth.
;
_publ_section_figure_captions
;    ?                                     #<< figure captions
;
 
 
#=======================================================================
#  Data block for single structure (one for each study in the paper)
#=======================================================================
 
 
data_lisl
 
 
# 2. EXPERIMENTAL DATA
#---------------------
 
 
_chemical_formula_sum                 'C56 H82 Li2 O10 S4'
_chemical_formula_moiety               ?
_chemical_formula_weight               1057.41
_chemical_melting_point                ?
 
_symmetry_cell_setting                 triclinic
_symmetry_space_group_name_H-M         P_-1
_symmetry_space_group_name_Hall        -p_1
 
loop_
_symmetry_equiv_pos_as_xyz
  +x,+y,+z  -x,-y,-z
 
_cell_length_a                         12.0190(10)
_cell_length_b                         13.662(2)
_cell_length_c                         19.499(2)
_cell_angle_alpha                      69.605(2)
_cell_angle_beta                       76.401(2)
_cell_angle_gamma                      88.831(2)
_cell_volume                           2910.3(6)
_cell_formula_units_Z                  2
 
_exptl_crystal_density_diffrn          1.207
_exptl_crystal_density_meas            ?
_exptl_crystal_density_method          ?
_diffrn_radiation_type                'Mo K\a'
_diffrn_radiation_wavelength           .71073
 
_cell_measurement_reflns_used          8192
_cell_measurement_theta_min            3.2
_cell_measurement_theta_max            24.2
_cell_measurement_temperature          153
 
_exptl_absorpt_coefficient_mu          .217
_exptl_crystal_description             prism
_exptl_crystal_size_max                .45
_exptl_crystal_size_mid                .4
_exptl_crystal_size_min                .25
_exptl_crystal_size_rad                ?
_exptl_crystal_colour                  colourless
 
_diffrn_measurement_device_type
;
Bruker SMART CCD diffractometer
;
_diffrn_measurement_method             '\w scans'
_diffrn_detector_area_resol_mean       ?
 
_exptl_absorpt_correction_type         multi-scan
_exptl_absorpt_process_details
;
 SADABS; Sheldrick, 1996
;
_exptl_absorpt_correction_T_min        .827
_exptl_absorpt_correction_T_max        .928
 
_diffrn_reflns_number                  33597
_reflns_number_total                   14147
_reflns_Friedel_coverage               0
_reflns_number_gt                      12259
_reflns_threshold_expression          'F    > 4.00 sig(F   )'
 
_diffrn_reflns_theta_max               29.05
_diffrn_reflns_theta_full              ?
_diffrn_measured_fraction_theta_max    ?
_diffrn_measured_fraction_theta_full   ?
_diffrn_reflns_av_R_equivalents        .045
_diffrn_reflns_limit_h_min             -15
_diffrn_reflns_limit_h_max             16
_diffrn_reflns_limit_k_min             -17
_diffrn_reflns_limit_k_max             18
_diffrn_reflns_limit_l_min             0
_diffrn_reflns_limit_l_max             25
_diffrn_standards_number               ?
_diffrn_standards_interval_count       ?
_diffrn_standards_interval_time        ?  
_diffrn_standards_decay_%              0 
 
 
_refine_ls_structure_factor_coef       F
_refine_ls_R_factor_gt                 .042
_refine_ls_wR_factor_ref               .052
_refine_ls_goodness_of_fit_ref         1.198
_refine_ls_number_reflns               12259
_refine_ls_number_parameters           933
_refine_ls_weighting_scheme            calc
_refine_ls_weighting_details           ?
_refine_ls_hydrogen_treatment          mixed
_refine_ls_shift/su_max                .032
_refine_diff_density_min               -.788
_refine_diff_density_max               .802
 
_refine_ls_extinction_method           Zachariasen
_refine_ls_extinction_coef             1583(619)
_refine_ls_abs_structure_details       ?
_refine_ls_abs_structure_Flack         ?
 
 
# 3. Information for the "methods" section
#-----------------------------------------
 
_computing_data_collection             'Siemens SMART (Siemens, 1995)'
_computing_cell_refinement             'Siemens SAINT (Siemens, 1995)'
_computing_data_reduction              xtal
_computing_structure_solution          xtal
_computing_structure_refinement       'xtal CRYLSQ'
_computing_molecular_graphics          xtal
_computing_publication_material       'xtal BONDLA CIFIO'
 
 
# 4. Supplementary data for validation and tables
#------------------------------------------------
 
loop_
_atom_type_symbol
_atom_type_description
_atom_type_oxidation_number
_atom_type_number_in_cell
_atom_type_scat_dispersion_real
_atom_type_scat_dispersion_imag
_atom_type_scat_source
  C  ?  0  112  .002  .002  'Int Tables Vol IV Tables 2.2B and 2.3.1'
  H  ?  0  164  0  0  'Int Tables Vol IV Tables 2.2B and 2.3.1'
  Li  ?  0  4  0  0  'Int Tables Vol IV Tables 2.2B and 2.3.1'
  O  ?  0  20  .008  .006  'Int Tables Vol IV Tables 2.2B and 2.3.1'
  S  ?  0  8  .11  .124  'Int Tables Vol IV Tables 2.2B and 2.3.1'
 
loop_
_atom_site_label
_atom_site_fract_x
_atom_site_fract_y
_atom_site_fract_z
_atom_site_U_iso_or_equiv
_atom_site_adp_type
_atom_site_calc_flag
_atom_site_calc_attached_atom
_atom_site_occupancy
_atom_site_disorder_assembly
_atom_site_disorder_group
  Li1  .1129(2)  .8003(2)  .46078(16)  .022(2)  Uani  ?  ?  1.00000  ?  ?
  Li2  .1994(2)  1.0426(2)  .43889(16)  .021(2)  Uani  ?  ?  1.00000  ?  ?
  O11  .03104(10)  .88960(9)  .38809(6)  .0195(8)  Uani  ?  ?  1.00000  ?  ?
  C11  .01195(13)  .87187(12)  .32806(9)  .0178(11)  Uani  ?  ?  1.00000  ?  ?
  C12  -.04416(14)  .94256(12)  .27743(9)  .0197(11)  Uani  ?  ?  1.00000  ?  ?
  C13  -.06661(17)  .92003(14)  .21743(10)  .0271(13)  Uani  ?  ?  1.00000  ?  ?
  C14  -.03367(19)  .82901(15)  .20350(10)  .0314(15)  Uani  ?  ?  1.00000  ?  ?
  C141  -.0618(3)  .80372(19)  .13842(13)  .050(2)  Uani  ?  ?  1.00000  ?  ?
  C142  -.1385(4)  .6843(3)  .1796(2)  .036(3)  Uani  ?  ?  .50000  ?  ?
  C143  .0278(4)  .7987(4)  .0849(2)  .041(4)  Uani  ?  ?  .50000  ?  ?
  C144  -.1639(4)  .8707(3)  .1090(2)  .037(3)  Uani  ?  ?  .50000  ?  ?
  C142'  .0170(4)  .7172(3)  .1205(2)  .040(4)  Uani  ?  ?  .50000  ?  ?
  C143'  .0014(5)  .9076(4)  .0592(2)  .043(4)  Uani  ?  ?  .50000  ?  ?
  C144'  -.1722(4)  .7943(5)  .1438(3)  .056(5)  Uani  ?  ?  .50000  ?  ?
  C15  .02359(16)  .76032(13)  .25285(10)  .0247(13)  Uani  ?  ?  1.00000  ?  ?
  C16  .04528(13)  .77948(12)  .31439(9)  .0191(11)  Uani  ?  ?  1.00000  ?  ?
  S1  .10509(3)  .68013(3)  .37985(2)  .0189(3)  Uani  ?  ?  1.00000  ?  ?
  O21  .08707(9)  1.06803(8)  .37489(6)  .0184(8)  Uani  ?  ?  1.00000  ?  ?
  C21  .10468(13)  1.13924(12)  .30471(9)  .0171(11)  Uani  ?  ?  1.00000  ?  ?
  C22  .19908(13)  1.21394(12)  .27462(9)  .0170(11)  Uani  ?  ?  1.00000  ?  ?
  C23  .21486(14)  1.28987(13)  .20287(9)  .0205(11)  Uani  ?  ?  1.00000  ?  ?
  C24  .14095(15)  1.29483(13)  .15647(9)  .0218(12)  Uani  ?  ?  1.00000  ?  ?
  C241  .15893(16)  1.38148(14)  .07874(10)  .0277(13)  Uani  ?  ?  1.00000  ?
  ?
  C242  .1029(3)  1.4788(2)  .08922(14)  .065(2)  Uani  ?  ?  1.00000  ?  ?
  C243  .1071(3)  1.3477(2)  .02572(13)  .064(2)  Uani  ?  ?  1.00000  ?  ?
  C244  .28661(19)  1.41180(19)  .04165(11)  .0411(16)  Uani  ?  ?  1.00000  ?
  ?
  C25  .04780(14)  1.22026(13)  .18606(9)  .0210(12)  Uani  ?  ?  1.00000  ?  ?
  C26  .02899(13)  1.14441(12)  .25826(9)  .0185(11)  Uani  ?  ?  1.00000  ?  ?
  S2  -.09705(3)  1.05803(3)  .29292(2)  .0196(3)  Uani  ?  ?  1.00000  ?  ?
  O31  .33643(9)  .98703(8)  .39123(6)  .0192(8)  Uani  ?  ?  1.00000  ?  ?
  C31  .41601(13)  1.03855(12)  .32862(9)  .0171(11)  Uani  ?  ?  1.00000  ?  ?
  C32  .50914(13)  .98994(12)  .29745(9)  .0184(11)  Uani  ?  ?  1.00000  ?  ?
  C33  .59005(14)  1.04722(13)  .23154(9)  .0214(12)  Uani  ?  ?  1.00000  ?  ?
  C34  .58501(14)  1.15433(14)  .19444(9)  .0234(12)  Uani  ?  ?  1.00000  ?  ?
  C341  .67345(16)  1.22072(15)  .12294(11)  .0321(14)  Uani  ?  ?  1.00000  ?
  ?
  C342  .73354(19)  1.30399(18)  .14072(14)  .0452(18)  Uani  ?  ?  1.00000  ?
  ?
  C343  .6123(2)  1.2746(2)  .05986(12)  .0488(19)  Uani  ?  ?  1.00000  ?  ?
  C344  .7654(2)  1.15463(18)  .09593(13)  .0477(18)  Uani  ?  ?  1.00000  ?  ?
  C35  .49445(14)  1.20250(13)  .22686(9)  .0212(11)  Uani  ?  ?  1.00000  ?  ?
  C36  .41148(13)  1.14726(12)  .29126(9)  .0177(11)  Uani  ?  ?  1.00000  ?  ?
  S3  .29945(3)  1.21539(3)  .32877(2)  .0170(3)  Uani  ?  ?  1.00000  ?  ?
  O41  .27394(10)  .81002(9)  .40878(6)  .0203(8)  Uani  ?  ?  1.00000  ?  ?
  C41  .32153(13)  .76688(12)  .35860(9)  .0181(11)  Uani  ?  ?  1.00000  ?  ?
  C42  .25523(14)  .70253(12)  .33800(9)  .0198(11)  Uani  ?  ?  1.00000  ?  ?
  C43  .30502(15)  .65258(13)  .28790(10)  .0236(12)  Uani  ?  ?  1.00000  ?  ?
  C44  .42233(15)  .66471(14)  .25477(10)  .0265(13)  Uani  ?  ?  1.00000  ?  ?
  C441  .48016(18)  .60943(17)  .20049(13)  .0374(17)  Uani  ?  ?  1.00000  ?  ?
  C442  .5663(2)  .5356(2)  .23543(18)  .059(3)  Uani  ?  ?  1.00000  ?  ?
  C443  .5428(2)  .6915(2)  .12551(14)  .053(2)  Uani  ?  ?  1.00000  ?  ?
  C444  .3930(2)  .5438(2)  .18561(17)  .059(3)  Uani  ?  ?  1.00000  ?  ?
  C45  .48796(14)  .73067(13)  .27354(10)  .0239(12)  Uani  ?  ?  1.00000  ?  ?
  C46  .44054(14)  .78109(12)  .32334(9)  .0196(11)  Uani  ?  ?  1.00000  ?  ?
  S4  .53409(3)  .85751(3)  .34656(2)  .0202(3)  Uani  ?  ?  1.00000  ?  ?
  O01  .12138(10)  .90167(9)  .51695(6)  .0202(8)  Uani  ?  ?  1.00000  ?  ?
  O02  .18661(13)  1.11373(10)  .50983(7)  .0339(11)  Uani  ?  ?  1.00000  ?  ?
  O101  .2850(4)  1.0134(4)  .0432(3)  .1253(16)  Uiso  ?  ?  .70000  ?  ?
  C102  .3208(6)  .9189(6)  .0948(4)  .109(2)  Uiso  ?  ?  .70000  ?  ?
  C103  .3691(6)  .9510(5)  .1424(4)  .105(2)  Uiso  ?  ?  .70000  ?  ?
  C104  .3163(7)  1.0613(6)  .1377(4)  .121(2)  Uiso  ?  ?  .70000  ?  ?
  C105  .3078(7)  1.1030(6)  .0634(4)  .121(2)  Uiso  ?  ?  .70000  ?  ?
  O101'  .4147(15)  1.0640(14)  .0551(10)  .187(6)  Uiso  ?  ?  .30000  ?  ?
  C102'  .3698(11)  .9502(10)  .0630(7)  .083(3)  Uiso  ?  ?  .30000  ?  ?
  C103'  .2863(14)  .9562(13)  .1642(9)  .108(5)  Uiso  ?  ?  .30000  ?  ?
  C104'  .2856(6)  1.0108(6)  .1660(4)  .0370(15)  Uiso  ?  ?  .30000  ?  ?
  C105'  .2382(9)  1.0667(8)  .0914(6)  .060(2)  Uiso  ?  ?  .30000  ?  ?
  O201  .06290(12)  .67599(10)  .55442(7)  .0307(10)  Uani  ?  ?  1.00000  ?  ?
  C202  -.0133(2)  .67695(17)  .62349(12)  .0409(16)  Uani  ?  ?  1.00000  ?  ?
  C203  -.0282(2)  .56640(18)  .67848(12)  .0448(18)  Uani  ?  ?  1.00000  ?  ?
  C204  .0821(2)  .52055(15)  .65087(12)  .0357(15)  Uani  ?  ?  1.00000  ?  ?
  C205  .10259(17)  .57297(14)  .56623(11)  .0304(14)  Uani  ?  ?  1.00000  ?  ?
  C405  .35800(16)  .89239(15)  .59646(11)  .0296(14)  Uani  ?  ?  1.00000  ?  ?
  O301  .74470(14)  .68657(11)  .50368(9)  .0396(12)  Uani  ?  ?  1.00000  ?  ?
  C302  .75022(19)  .67621(16)  .43239(13)  .0374(16)  Uani  ?  ?  1.00000  ?  ?
  C303  .65168(19)  .59783(16)  .44758(13)  .0392(17)  Uani  ?  ?  1.00000  ?  ?
  C304  .63047(18)  .53322(16)  .53238(13)  .0383(17)  Uani  ?  ?  1.00000  ?  ?
  C305  .7162(2)  .58363(16)  .55854(13)  .0395(17)  Uani  ?  ?  1.00000  ?  ?
  O401  .27347(11)  .81587(11)  .60006(8)  .0321(11)  Uani  ?  ?  1.00000  ?  ?
  C402  .3323(2)  .72601(17)  .59085(16)  .048(2)  Uani  ?  ?  1.00000  ?  ?
  C403  .4592(2)  .75129(18)  .57852(14)  .0425(19)  Uani  ?  ?  1.00000  ?  ?
  C404  .46873(16)  .86970(16)  .55093(11)  .0299(14)  Uani  ?  ?  1.00000  ?  ?
  H11  .049(3)  .971(3)  .3795(18)  .081(10)  Uiso  ?  ?  1.00000  ?  ?
  H13  -.1066(18)  .9693(17)  .1846(12)  .031(6)  Uiso  ?  ?  1.00000  ?  ?
  H142a  -.16856  .66606  .14406  .05301  Uiso  ?  ?  .50000  ?  ?
  H142b  -.20178  .67508  .22406  .04429  Uiso  ?  ?  .50000  ?  ?
  H142c  -.07996  .63741  .19344  .04361  Uiso  ?  ?  .50000  ?  ?
  H143a  .01423  .76817  .04752  .07499  Uiso  ?  ?  .50000  ?  ?
  H143b  .08657  .75627  .10129  .02596  Uiso  ?  ?  .50000  ?  ?
  H143c  .07226  .87156  .05967  .04699  Uiso  ?  ?  .50000  ?  ?
  H144a  -.18284  .84427  .07104  .02850  Uiso  ?  ?  .50000  ?  ?
  H144b  -.12907  .94470  .08220  .03071  Uiso  ?  ?  .50000  ?  ?
  H144c  -.22525  .87674  .14540  .03062  Uiso  ?  ?  .50000  ?  ?
  H142'a  .00519  .70493  .07524  .05063  Uiso  ?  ?  .50000  ?  ?
  H142'b  -.01137  .65118  .16443  .04603  Uiso  ?  ?  .50000  ?  ?
  H142'c  .09414  .71538  .12015  .04151  Uiso  ?  ?  .50000  ?  ?
  H143'a  -.01295  .89442  .01636  .04065  Uiso  ?  ?  .50000  ?  ?
  H143'b  .08552  .92691  .04785  .06632  Uiso  ?  ?  .50000  ?  ?
  H143'c  -.04398  .96771  .06072  .06027  Uiso  ?  ?  .50000  ?  ?
  H144'a  -.19495  .77307  .10987  .04965  Uiso  ?  ?  .50000  ?  ?
  H144'b  -.22926  .83414  .16048  .06886  Uiso  ?  ?  .50000  ?  ?
  H144'c  -.21508  .72262  .19926  .06248  Uiso  ?  ?  .50000  ?  ?
  H15  .0486(18)  .6979(16)  .2468(11)  .026(5)  Uiso  ?  ?  1.00000  ?  ?
  H23  .2790(17)  1.3387(16)  .1863(11)  .024(5)  Uiso  ?  ?  1.00000  ?  ?
  H242a  .111(3)  1.536(2)  .0404(18)  .078(10)  Uiso  ?  ?  1.00000  ?  ?
  H242b  .132(4)  1.504(3)  .129(2)  .129(15)  Uiso  ?  ?  1.00000  ?  ?
  H242c  .026(3)  1.463(2)  .1107(18)  .077(10)  Uiso  ?  ?  1.00000  ?  ?
  H243a  .126(2)  1.402(2)  -.0255(16)  .064(8)  Uiso  ?  ?  1.00000  ?  ?
  H243b  .026(3)  1.327(3)  .043(2)  .104(12)  Uiso  ?  ?  1.00000  ?  ?
  H243c  .153(2)  1.287(2)  .0187(15)  .059(8)  Uiso  ?  ?  1.00000  ?  ?
  H244a  .297(2)  1.460(2)  -.0122(14)  .051(7)  Uiso  ?  ?  1.00000  ?  ?
  H244b  .330(2)  1.350(2)  .0414(16)  .067(9)  Uiso  ?  ?  1.00000  ?  ?
  H244c  .324(2)  1.445(2)  .0693(15)  .058(8)  Uiso  ?  ?  1.00000  ?  ?
  H25  -.0087(18)  1.2214(16)  .1582(12)  .029(5)  Uiso  ?  ?  1.00000  ?  ?
  H31  .326(3)  .909(3)  .3957(19)  .086(11)  Uiso  ?  ?  1.00000  ?  ?
  H33  .6489(17)  1.0114(16)  .2157(11)  .025(5)  Uiso  ?  ?  1.00000  ?  ?
  H342a  .791(2)  1.348(2)  .0971(15)  .056(8)  Uiso  ?  ?  1.00000  ?  ?
  H342b  .772(2)  1.272(2)  .1824(15)  .059(8)  Uiso  ?  ?  1.00000  ?  ?
  H342c  .675(2)  1.351(2)  .1564(15)  .056(8)  Uiso  ?  ?  1.00000  ?  ?
  H343a  .666(2)  1.318(2)  .0146(15)  .058(8)  Uiso  ?  ?  1.00000  ?  ?
  H343b  .553(2)  1.321(2)  .0754(15)  .054(7)  Uiso  ?  ?  1.00000  ?  ?
  H343c  .577(2)  1.222(2)  .0476(15)  .059(8)  Uiso  ?  ?  1.00000  ?  ?
  H344a  .814(2)  1.200(2)  .0481(16)  .061(8)  Uiso  ?  ?  1.00000  ?  ?
  H344b  .729(2)  1.1040(17)  .0807(12)  .034(6)  Uiso  ?  ?  1.00000  ?  ?
  H344c  .809(2)  1.118(2)  .1324(14)  .048(7)  Uiso  ?  ?  1.00000  ?  ?
  H35  .4885(17)  1.2771(16)  .2035(11)  .024(5)  Uiso  ?  ?  1.00000  ?  ?
  H43  .2543(17)  .6095(15)  .2772(11)  .022(5)  Uiso  ?  ?  1.00000  ?  ?
  H442a  .604(3)  .508(2)  .2002(18)  .079(10)  Uiso  ?  ?  1.00000  ?  ?
  H442b  .528(3)  .479(2)  .2826(17)  .075(10)  Uiso  ?  ?  1.00000  ?  ?
  H442c  .627(2)  .574(2)  .2469(16)  .062(8)  Uiso  ?  ?  1.00000  ?  ?
  H443a  .578(3)  .661(2)  .0918(18)  .079(10)  Uiso  ?  ?  1.00000  ?  ?
  H443b  .601(2)  .738(2)  .1306(14)  .046(7)  Uiso  ?  ?  1.00000  ?  ?
  H443c  .491(2)  .740(2)  .1017(15)  .058(8)  Uiso  ?  ?  1.00000  ?  ?
  H444a  .433(3)  .510(2)  .1501(18)  .079(10)  Uiso  ?  ?  1.00000  ?  ?
  H444b  .340(2)  .5933(18)  .1597(13)  .036(6)  Uiso  ?  ?  1.00000  ?  ?
  H444c  .349(3)  .481(2)  .2368(18)  .077(10)  Uiso  ?  ?  1.00000  ?  ?
  H45  .566(2)  .7390(17)  .2537(13)  .036(6)  Uiso  ?  ?  1.00000  ?  ?
  H102a  .27489  .86808  .11046  .17400  Uiso  ?  ?  .70000  ?  ?
  H102b  .39399  .90692  .05486  .17400  Uiso  ?  ?  .70000  ?  ?
  H103a  .34373  .89977  .18978  .16000  Uiso  ?  ?  .70000  ?  ?
  H103b  .44958  .96333  .12854  .16000  Uiso  ?  ?  .70000  ?  ?
  H104a  .23317  1.03976  .16865  .09700  Uiso  ?  ?  .70000  ?  ?
  H104b  .34930  1.09261  .16361  .09700  Uiso  ?  ?  .70000  ?  ?
  H105a  .27819  1.16601  .04811  .10300  Uiso  ?  ?  .70000  ?  ?
  H105b  .40339  1.13323  .03337  .10300  Uiso  ?  ?  .70000  ?  ?
  H102'a  .34232  .99002  .01521  .11700  Uiso  ?  ?  .30000  ?  ?
  H102'b  .44713  .94397  .04613  .11700  Uiso  ?  ?  .30000  ?  ?
  H103'a  .21494  .91969  .16296  .16000  Uiso  ?  ?  .30000  ?  ?
  H103'b  .32528  .90313  .19278  .16000  Uiso  ?  ?  .30000  ?  ?
  H104'a  .22008  .99504  .20923  .12100  Uiso  ?  ?  .30000  ?  ?
  H104'b  .35019  1.02653  .17609  .12100  Uiso  ?  ?  .30000  ?  ?
  H105'a  .21122  1.04448  .06270  .10500  Uiso  ?  ?  .30000  ?  ?
  H105'b  .22840  1.14441  .08061  .10500  Uiso  ?  ?  .30000  ?  ?
  H202a  -.080(2)  .709(2)  .6095(15)  .056(8)  Uiso  ?  ?  1.00000  ?  ?
  H202b  .036(3)  .717(2)  .6482(17)  .077(10)  Uiso  ?  ?  1.00000  ?  ?
  H203a  -.104(3)  .525(3)  .675(2)  .100(12)  Uiso  ?  ?  1.00000  ?  ?
  H203b  -.042(2)  .566(2)  .7308(16)  .060(8)  Uiso  ?  ?  1.00000  ?  ?
  H204a  .078(2)  .438(2)  .6665(15)  .053(7)  Uiso  ?  ?  1.00000  ?  ?
  H204b  .144(2)  .539(2)  .6690(15)  .055(8)  Uiso  ?  ?  1.00000  ?  ?
  H205a  .186(2)  .5828(19)  .5384(13)  .042(6)  Uiso  ?  ?  1.00000  ?  ?
  H205b  .059(2)  .5350(18)  .5453(13)  .038(6)  Uiso  ?  ?  1.00000  ?  ?
  H405a  .360(2)  .879(2)  .6496(14)  .046(7)  Uiso  ?  ?  1.00000  ?  ?
  H405b  .332(2)  .9611(17)  .5741(13)  .035(6)  Uiso  ?  ?  1.00000  ?  ?
  H302a  .823(2)  .649(2)  .4144(14)  .046(7)  Uiso  ?  ?  1.00000  ?  ?
  H302b  .742(2)  .746(2)  .3971(14)  .047(7)  Uiso  ?  ?  1.00000  ?  ?
  H303a  .674(2)  .552(2)  .4158(15)  .054(8)  Uiso  ?  ?  1.00000  ?  ?
  H303b  .586(2)  .635(2)  .4373(15)  .057(8)  Uiso  ?  ?  1.00000  ?  ?
  H304a  .640(2)  .4614(19)  .5413(14)  .044(7)  Uiso  ?  ?  1.00000  ?  ?
  H304b  .548(2)  .538(2)  .5597(14)  .051(7)  Uiso  ?  ?  1.00000  ?  ?
  H305a  .680(2)  .592(2)  .6092(16)  .062(8)  Uiso  ?  ?  1.00000  ?  ?
  H305b  .786(2)  .544(2)  .5601(15)  .055(8)  Uiso  ?  ?  1.00000  ?  ?
  H402a  .318(3)  .708(3)  .5456(18)  .083(10)  Uiso  ?  ?  1.00000  ?  ?
  H402b  .298(2)  .668(2)  .6400(15)  .054(7)  Uiso  ?  ?  1.00000  ?  ?
  H403a  .504(3)  .719(3)  .5427(19)  .085(10)  Uiso  ?  ?  1.00000  ?  ?
  H403b  .475(2)  .719(2)  .6268(15)  .059(8)  Uiso  ?  ?  1.00000  ?  ?
  H404a  .537(2)  .8999(18)  .5567(13)  .041(6)  Uiso  ?  ?  1.00000  ?  ?
  H404b  .470(2)  .8981(17)  .4965(12)  .035(6)  Uiso  ?  ?  1.00000  ?  ?
  H01a  .166(2)  .871(2)  .5450(14)  .047(7)  Uiso  ?  ?  1.00000  ?  ?
  H01b  .064(2)  .9120(17)  .5463(13)  .036(6)  Uiso  ?  ?  1.00000  ?  ?
  H02a  .133(2)  1.103(2)  .5450(15)  .056(8)  Uiso  ?  ?  1.00000  ?  ?
  H02b  .211(2)  1.174(2)  .4995(14)  .052(7)  Uiso  ?  ?  1.00000  ?  ?
 
loop_
_atom_site_aniso_label
_atom_site_aniso_U_11
_atom_site_aniso_U_22
_atom_site_aniso_U_33
_atom_site_aniso_U_12
_atom_site_aniso_U_13
_atom_site_aniso_U_23
  Li1  .0244(14)  .0208(13)  .0200(13)  .0003(11)  -.0044(11)  -.0071(11)
  Li2  .0232(14)  .0214(13)  .0196(13)  .0011(11)  -.0045(11)  -.0078(11)
  O11  .0238(6)  .0175(5)  .0191(5)  .0000(4)  -.0067(4)  -.0075(4)
  C11  .0163(7)  .0183(7)  .0177(7)  -.0024(5)  -.0020(6)  -.0061(6)
  C12  .0185(7)  .0188(7)  .0220(8)  .0007(6)  -.0040(6)  -.0080(6)
  C13  .0355(10)  .0245(8)  .0251(9)  .0052(7)  -.0143(7)  -.0093(7)
  C14  .0489(12)  .0273(9)  .0249(9)  .0077(8)  -.0165(8)  -.0132(7)
  C141  .090(2)  .0451(13)  .0414(12)  .0316(13)  -.0437(13)  -.0306(11)
  C142  .048(2)  .034(2)  .033(2)  -.0068(17)  -.0192(18)  -.0134(17)
  C143  .038(2)  .061(3)  .029(2)  .002(2)  -.0048(17)  -.026(2)
  C144  .050(2)  .034(2)  .036(2)  .0067(18)  -.026(2)  -.0138(17)
  C142'  .059(3)  .040(2)  .034(2)  .016(2)  -.022(2)  -.0243(18)
  C143'  .066(3)  .041(2)  .025(2)  .004(2)  -.014(2)  -.0120(17)
  C144'  .030(2)  .104(4)  .062(3)  .002(2)  -.017(2)  -.060(3)
  C15  .0316(9)  .0210(8)  .0239(8)  .0031(7)  -.0064(7)  -.0111(7)
  C16  .0177(7)  .0191(7)  .0201(7)  .0001(6)  -.0041(6)  -.0067(6)
  S1  .01887(18)  .01588(17)  .02081(19)  -.00075(13)  -.00385(14)  -.00563(14)
  O21  .0203(5)  .0168(5)  .0174(5)  -.0002(4)  -.0052(4)  -.0050(4)
  C21  .0181(7)  .0150(7)  .0191(7)  .0033(5)  -.0043(6)  -.0075(6)
  C22  .0167(7)  .0167(7)  .0191(7)  .0030(5)  -.0050(6)  -.0080(6)
  C23  .0201(7)  .0190(7)  .0211(8)  .0005(6)  -.0043(6)  -.0060(6)
  C24  .0241(8)  .0214(8)  .0188(8)  .0025(6)  -.0057(6)  -.0054(6)
  C241  .0299(9)  .0281(9)  .0204(8)  -.0007(7)  -.0081(7)  -.0016(7)
  C242  .080(2)  .0437(14)  .0378(13)  .0323(13)  .0061(13)  .0111(11)
  C243  .082(2)  .0729(18)  .0268(11)  -.0344(15)  -.0270(12)  .0067(11)
  C244  .0350(11)  .0495(13)  .0244(10)  -.0045(9)  -.0043(8)  .0032(9)
  C25  .0222(8)  .0217(8)  .0210(8)  .0037(6)  -.0089(6)  -.0076(6)
  C26  .0168(7)  .0180(7)  .0217(8)  .0017(6)  -.0045(6)  -.0084(6)
  S2  .01614(18)  .01956(18)  .0244(2)  .00198(14)  -.00576(15)  -.00879(15)
  O31  .0183(5)  .0166(5)  .0204(5)  -.0005(4)  -.0008(4)  -.0062(4)
  C31  .0163(7)  .0181(7)  .0182(7)  -.0008(5)  -.0051(6)  -.0075(6)
  C32  .0181(7)  .0166(7)  .0219(8)  .0018(5)  -.0066(6)  -.0075(6)
  C33  .0181(7)  .0236(8)  .0229(8)  .0031(6)  -.0034(6)  -.0098(6)
  C34  .0209(8)  .0253(8)  .0203(8)  .0016(6)  -.0020(6)  -.0054(6)
  C341  .0269(9)  .0303(9)  .0263(9)  .0044(7)  .0039(7)  -.0013(7)
  C342  .0309(10)  .0364(11)  .0502(13)  -.0080(9)  .0070(9)  -.0037(10)
  C343  .0440(13)  .0571(15)  .0257(10)  .0064(11)  -.0010(9)  .0041(10)
  C344  .0423(12)  .0394(12)  .0400(12)  .0080(10)  .0149(10)  -.0045(10)
  C35  .0199(7)  .0188(7)  .0220(8)  .0012(6)  -.0044(6)  -.0043(6)
  C36  .0158(7)  .0191(7)  .0197(7)  .0020(5)  -.0048(6)  -.0083(6)
  S3  .01682(17)  .01652(17)  .01891(18)  .00141(13)  -.00486(14)  -.00746(14)
  O41  .0195(5)  .0199(5)  .0219(6)  -.0011(4)  -.0010(4)  -.0106(5)
  C41  .0194(7)  .0146(7)  .0198(7)  .0021(5)  -.0043(6)  -.0058(6)
  C42  .0191(7)  .0169(7)  .0223(8)  .0013(6)  -.0041(6)  -.0065(6)
  C43  .0245(8)  .0209(8)  .0281(9)  -.0006(6)  -.0052(7)  -.0127(7)
  C44  .0259(8)  .0242(8)  .0313(9)  .0008(7)  -.0011(7)  -.0159(7)
  C441  .0313(10)  .0401(11)  .0474(12)  -.0019(8)  .0035(9)  -.0318(10)
  C442  .0533(15)  .0517(15)  .083(2)  .0194(12)  -.0055(14)  -.0455(15)
  C443  .0554(15)  .0625(16)  .0445(13)  -.0089(12)  .0110(11)  -.0360(12)
  C444  .0470(14)  .0723(18)  .0753(18)  -.0107(12)  .0058(12)  -.0617(16)
  C45  .0197(8)  .0217(8)  .0295(9)  .0008(6)  -.0006(6)  -.0117(7)
  C46  .0194(7)  .0159(7)  .0240(8)  .0009(6)  -.0049(6)  -.0077(6)
  S4  .01779(18)  .01735(18)  .0269(2)  .00258(14)  -.00733(15)  -.00826(15)
  O01  .0209(6)  .0204(5)  .0191(5)  .0012(4)  -.0041(4)  -.0071(4)
  O02  .0446(8)  .0281(7)  .0250(7)  -.0137(6)  .0083(6)  -.0144(5)
  O201  .0417(8)  .0190(6)  .0234(6)  .0045(5)  .0051(5)  -.0063(5)
  C202  .0477(12)  .0339(10)  .0289(10)  .0083(9)  .0095(9)  -.0087(8)
  C203  .0535(14)  .0399(12)  .0300(11)  -.0031(10)  .0045(10)  -.0081(9)
  C204  .0447(12)  .0265(9)  .0316(10)  -.0006(8)  -.0099(9)  -.0046(8)
  C205  .0385(10)  .0192(8)  .0297(9)  .0033(7)  -.0022(8)  -.0083(7)
  C405  .0253(9)  .0326(9)  .0353(10)  .0005(7)  -.0090(7)  -.0164(8)
  O301  .0476(9)  .0249(7)  .0471(9)  -.0041(6)  -.0109(7)  -.0138(6)
  C302  .0379(11)  .0293(10)  .0420(12)  -.0007(8)  -.0074(9)  -.0102(9)
  C303  .0382(11)  .0313(10)  .0523(13)  .0031(8)  -.0197(10)  -.0144(9)
  C304  .0337(10)  .0251(9)  .0536(13)  .0004(8)  -.0069(9)  -.0134(9)
  C305  .0456(12)  .0283(10)  .0441(12)  .0006(9)  -.0129(10)  -.0109(9)
  O401  .0243(6)  .0329(7)  .0413(8)  .0001(5)  -.0135(6)  -.0122(6)
  C402  .0464(13)  .0283(10)  .0761(17)  .0048(9)  -.0336(12)  -.0163(11)
  C403  .0380(11)  .0372(11)  .0587(14)  .0129(9)  -.0191(10)  -.0207(10)
  C404  .0264(9)  .0363(10)  .0293(9)  .0012(7)  -.0076(7)  -.0136(8)
 
 
# 5. Molecular Geometry
#----------------------
 
loop_
_geom_bond_atom_site_label_1
_geom_bond_atom_site_label_2
_geom_bond_site_symmetry_1
_geom_bond_site_symmetry_2
_geom_bond_distance
_geom_bond_publ_flag                 #<< enter YES for value to be published
  Li1  O11  .  .  1.967(3)  ?
  Li1  O41  .  .  1.945(3)  ?
  Li1  O01  .  .  2.060(4)  ?
  Li1  O201  .  .  1.986(3)  ?
  Li2  O21  .  .  1.993(4)  ?
  Li2  O31  .  .  1.968(3)  ?
  Li2  O01  .  .  2.065(3)  ?
  Li2  O02  .  .  1.926(4)  ?
  O11  C11  .  .  1.344(2)  ?
  O11  H11  .  .  1.08(4)  ?
  C11  C12  .  .  1.409(2)  ?
  C11  C16  .  .  1.410(3)  ?
  C12  C13  .  .  1.393(3)  ?
  C12  S2  .  .  1.7846(19)  ?
  C13  C14  .  .  1.393(3)  ?
  C13  H13  .  .  .96(2)  ?
  C14  C141  .  .  1.535(4)  ?
  C14  C15  .  .  1.391(3)  ?
  C141  C142  .  .  1.720(5)  ?
  C141  C143  .  .  1.332(5)  ?
  C141  C144  .  .  1.610(6)  ?
  C141  C142'  .  .  1.583(6)  ?
  C141  C143'  .  .  1.715(4)  ?
  C141  C144'  .  .  1.311(6)  ?
  C142  C142'  .  .  1.920(6)  ?
  C142  C144'  .  .  1.513(7)  ?
  C142  H142a  .  .  .956(5)  ?
  C142  H142b  .  .  .981(4)  ?
  C142  H142c  .  .  .964(5)  ?
  C142  H144'c  .  .  1.105(5)  ?
  C143  C142'  .  .  1.079(6)  ?
  C143  C143'  .  .  1.449(7)  ?
  C143  H143a  .  .  1.001(6)  ?
  C143  H143b  .  .  .947(5)  ?
  C143  H143c  .  .  1.037(5)  ?
  C143  H142'a  .  .  1.399(6)  ?
  C143  H142'c  .  .  1.442(5)  ?
  C144  C143'  .  .  1.984(7)  ?
  C144  C144'  .  .  1.019(7)  ?
  C144  H144a  .  .  1.000(5)  ?
  C144  H144b  .  .  1.008(4)  ?
  C144  H144c  .  .  .919(4)  ?
  C144  H144'a  .  .  1.386(5)  ?
  C144  H144'b  .  .  1.081(4)  ?
  C142'  H143a  .  .  1.357(4)  ?
  C142'  H143b  .  .  .925(5)  ?
  C142'  H142'a  .  .  .995(5)  ?
  C142'  H142'b  .  .  1.000(4)  ?
  C142'  H142'c  .  .  .925(5)  ?
  C143'  H143c  .  .  .975(5)  ?
  C143'  H143'a  .  .  .966(5)  ?
  C143'  H143'b  .  .  1.003(5)  ?
  C143'  H143'c  .  .  .982(5)  ?
  C144'  H144a  .  .  1.380(6)  ?
  C144'  H144c  .  .  1.289(7)  ?
  C144'  H144'a  .  .  .906(7)  ?
  C144'  H144'b  .  .  .935(6)  ?
  C144'  H144'c  .  .  1.189(5)  ?
  C15  C16  .  .  1.395(3)  ?
  C15  H15  .  .  .93(2)  ?
  C16  S1  .  .  1.7812(16)  ?
  S1  C42  .  .  1.7810(16)  ?
  O21  C21  .  .  1.3447(17)  ?
  O21  H11  .  .  1.38(4)  ?
  C21  C22  .  .  1.411(2)  ?
  C21  C26  .  .  1.412(3)  ?
  C22  C23  .  .  1.393(2)  ?
  C22  S3  .  .  1.7846(19)  ?
  C23  C24  .  .  1.395(3)  ?
  C23  H23  .  .  .95(2)  ?
  C24  C241  .  .  1.533(2)  ?
  C24  C25  .  .  1.399(2)  ?
  C241  C242  .  .  1.534(4)  ?
  C241  C243  .  .  1.522(4)  ?
  C241  C244  .  .  1.531(3)  ?
  C242  H242a  .  .  .98(3)  ?
  C242  H242b  .  .  1.07(5)  ?
  C242  H242c  .  .  .91(3)  ?
  C243  H243a  .  .  .99(2)  ?
  C243  H243b  .  .  .96(4)  ?
  C243  H243c  .  .  1.02(3)  ?
  C244  H244a  .  .  1.00(2)  ?
  C244  H244b  .  .  .98(3)  ?
  C244  H244c  .  .  .99(3)  ?
  C25  C26  .  .  1.396(2)  ?
  C25  H25  .  .  .96(3)  ?
  C26  S2  .  .  1.7832(16)  ?
  O31  C31  .  .  1.3342(16)  ?
  O31  H31  .  .  1.04(4)  ?
  C31  C32  .  .  1.412(2)  ?
  C31  C36  .  .  1.414(2)  ?
  C32  C33  .  .  1.397(2)  ?
  C32  S4  .  .  1.7849(15)  ?
  C33  C34  .  .  1.396(2)  ?
  C33  H33  .  .  .91(2)  ?
  C34  C341  .  .  1.535(2)  ?
  C34  C35  .  .  1.398(2)  ?
  C341  C342  .  .  1.537(4)  ?
  C341  C343  .  .  1.538(3)  ?
  C341  C344  .  .  1.527(3)  ?
  C342  H342a  .  .  .97(2)  ?
  C342  H342b  .  .  .99(3)  ?
  C342  H342c  .  .  1.01(3)  ?
  C343  H343a  .  .  .97(2)  ?
  C343  H343b  .  .  1.01(3)  ?
  C343  H343c  .  .  .97(3)  ?
  C344  H344a  .  .  .98(2)  ?
  C344  H344b  .  .  .99(3)  ?
  C344  H344c  .  .  .98(3)  ?
  C35  C36  .  .  1.386(2)  ?
  C35  H35  .  .  .97(2)  ?
  C36  S3  .  .  1.7817(17)  ?
  O41  C41  .  .  1.326(2)  ?
  O41  H31  .  .  1.42(4)  ?
  C41  C42  .  .  1.412(3)  ?
  C41  C46  .  .  1.419(2)  ?
  C42  C43  .  .  1.397(3)  ?
  C43  C44  .  .  1.393(2)  ?
  C43  H43  .  .  .96(2)  ?
  C44  C441  .  .  1.537(3)  ?
  C44  C45  .  .  1.401(3)  ?
  C441  C442  .  .  1.537(4)  ?
  C441  C443  .  .  1.529(3)  ?
  C441  C444  .  .  1.532(4)  ?
  C442  H442a  .  .  .93(4)  ?
  C442  H442b  .  .  .99(3)  ?
  C442  H442c  .  .  1.02(3)  ?
  C443  H443a  .  .  .92(4)  ?
  C443  H443b  .  .  1.00(3)  ?
  C443  H443c  .  .  .97(3)  ?
  C444  H444a  .  .  .99(4)  ?
  C444  H444b  .  .  1.01(2)  ?
  C444  H444c  .  .  1.09(3)  ?
  C45  C46  .  .  1.390(3)  ?
  C45  H45  .  .  .92(2)  ?
  C46  S4  .  .  1.782(2)  ?
  O01  H01a  .  .  .86(3)  ?
  O01  H01b  .  .  .83(2)  ?
  O02  H02a  .  .  .79(2)  ?
  O02  H02b  .  .  .82(3)  ?
  O101  C102  .  .  1.463(8)  ?
  O101  C105  .  .  1.458(11)  ?
  O101  O101'  .  .  1.81(2)  ?
  O101  C102'  .  .  1.360(15)  ?
  O101  C105'  .  .  1.393(13)  ?
  O101  H102'a  .  .  .900(5)  ?
  O101  H105'a  .  .  1.025(5)  ?
  C102  C103  .  .  1.393(13)  ?
  C102  C102'  .  .  .754(13)  ?
  C102  C103'  .  .  1.57(2)  ?
  C102  H102a  .  .  .817(7)  ?
  C102  H102b  .  .  1.081(7)  ?
  C102  H102'a  .  .  1.481(6)  ?
  C103  C104  .  .  1.603(11)  ?
  C103  O101'  .  .  1.829(16)  ?
  C103  C102'  .  .  1.550(18)  ?
  C103  C103'  .  .  .997(18)  ?
  C103  C104'  .  .  1.377(11)  ?
  C103  H103a  .  .  .928(6)  ?
  C103  H103b  .  .  .943(7)  ?
  C103  H103'b  .  .  .996(6)  ?
  C103  H104'b  .  .  1.392(8)  ?
  C104  C105  .  .  1.388(12)  ?
  C104  O101'  .  .  1.749(19)  ?
  C104  C103'  .  .  1.369(18)  ?
  C104  C104'  .  .  .752(9)  ?
  C104  C105'  .  .  1.432(15)  ?
  C104  H104a  .  .  1.027(7)  ?
  C104  H104b  .  .  .921(10)  ?
  C104  H104'b  .  .  .916(8)  ?
  C105  O101'  .  .  1.38(2)  ?
  C105  C104'  .  .  1.915(10)  ?
  C105  C105'  .  .  .925(12)  ?
  C105  H105a  .  .  .903(8)  ?
  C105  H105b  .  .  1.169(7)  ?
  C105  H105'a  .  .  1.428(9)  ?
  C105  H105'b  .  .  1.142(8)  ?
  O101'  C102'  .  .  1.60(2)  ?
  O101'  H105b  .  .  .914(17)  ?
  C102'  H102a  .  .  1.499(12)  ?
  C102'  H102b  .  .  .705(15)  ?
  C102'  H102'a  .  .  1.029(14)  ?
  C102'  H102'b  .  .  .923(13)  ?
  C103'  C104'  .  .  .76(2)  ?
  C103'  C105'  .  .  1.867(19)  ?
  C103'  H103a  .  .  1.092(17)  ?
  C103'  H104a  .  .  1.316(18)  ?
  C103'  H103'a  .  .  1.011(19)  ?
  C103'  H103'b  .  .  .940(16)  ?
  C103'  H104'a  .  .  1.290(18)  ?
  C103'  H104'b  .  .  1.35(2)  ?
  C104'  C105'  .  .  1.618(13)  ?
  C104'  H104a  .  .  .738(7)  ?
  C104'  H104b  .  .  1.349(8)  ?
  C104'  H103'b  .  .  1.489(7)  ?
  C104'  H104'a  .  .  .972(7)  ?
  C104'  H104'b  .  .  .892(8)  ?
  C105'  H104a  .  .  1.407(11)  ?
  C105'  H105a  .  .  1.349(9)  ?
  C105'  H105'a  .  .  .848(13)  ?
  C105'  H105'b  .  .  1.017(11)  ?
  O201  C202  .  .  1.444(3)  ?
  O201  C205  .  .  1.435(2)  ?
  C202  C203  .  .  1.502(3)  ?
  C202  H202a  .  .  .96(3)  ?
  C202  H202b  .  .  1.10(4)  ?
  C203  C204  .  .  1.518(3)  ?
  C203  H203a  .  .  1.11(4)  ?
  C203  H203b  .  .  .99(3)  ?
  C204  C205  .  .  1.513(3)  ?
  C204  H204a  .  .  1.06(3)  ?
  C204  H204b  .  .  .97(3)  ?
  C205  H205a  .  .  1.01(2)  ?
  C205  H205b  .  .  .98(3)  ?
  C405  O401  .  .  1.445(3)  ?
  C405  C404  .  .  1.508(3)  ?
  C405  H405a  .  .  .99(3)  ?
  C405  H405b  .  .  .97(2)  ?
  O301  C302  .  .  1.432(3)  ?
  O301  C305  .  .  1.428(2)  ?
  C302  C303  .  .  1.517(3)  ?
  C302  H302a  .  .  .98(3)  ?
  C302  H302b  .  .  .98(2)  ?
  C303  C304  .  .  1.540(3)  ?
  C303  H303a  .  .  1.02(3)  ?
  C303  H303b  .  .  .95(3)  ?
  C304  C305  .  .  1.522(4)  ?
  C304  H304a  .  .  .95(3)  ?
  C304  H304b  .  .  1.02(2)  ?
  C305  H305a  .  .  1.03(3)  ?
  C305  H305b  .  .  .99(3)  ?
  O401  C402  .  .  1.449(3)  ?
  C402  C403  .  .  1.514(3)  ?
  C402  H402a  .  .  1.05(4)  ?
  C402  H402b  .  .  1.01(2)  ?
  C403  C404  .  .  1.514(3)  ?
  C403  H403a  .  .  1.00(4)  ?
  C403  H403b  .  .  .95(3)  ?
  C404  H404a  .  .  .98(3)  ?
  C404  H404b  .  .  .99(2)  ?
  H142b  H144'c  .  .  .70317(7)  ?
  H142c  H142'b  .  .  .86478(6)  ?
  H143a  H142'a  .  .  .83735(10)  ?
  H143b  H142'c  .  .  .57102(6)  ?
  H143c  H143'b  .  .  .71869(10)  ?
  H144a  H144'a  .  .  .99060(11)  ?
  H144c  H144'b  .  .  .55019(7)  ?
  H102b  H102'b  .  .  .77144(6)  ?
  H103a  H103'b  .  .  .223738(17)  ?
  H104a  H104'a  .  .  .79534(7)  ?
  H104b  H104'b  .  .  .84974(13)  ?
  H105a  H105'b  .  .  .73846(5)  ?
 
loop_
_geom_angle_atom_site_label_1
_geom_angle_atom_site_label_2
_geom_angle_atom_site_label_3
_geom_angle_site_symmetry_1
_geom_angle_site_symmetry_2
_geom_angle_site_symmetry_3
_geom_angle
_geom_angle_publ_flag                #<< enter YES for value to be published
  O11  Li1  O41  .  .  .  107.75(13)  ?
  O11  Li1  O01  .  .  .  96.99(14)  ?
  O11  Li1  O201  .  .  .  132.85(16)  ?
  O41  Li1  O01  .  .  .  99.17(15)  ?
  O41  Li1  O201  .  .  .  115.30(15)  ?
  O01  Li1  O201  .  .  .  94.37(14)  ?
  O21  Li2  O31  .  .  .  108.81(17)  ?
  O21  Li2  O01  .  .  .  96.15(14)  ?
  O21  Li2  O02  .  .  .  118.93(16)  ?
  O31  Li2  O01  .  .  .  97.52(13)  ?
  O31  Li2  O02  .  .  .  128.38(18)  ?
  O01  Li2  O02  .  .  .  95.87(13)  ?
  Li1  O11  C11  .  .  .  126.09(14)  ?
  Li1  O11  H11  .  .  .  110(2)  ?
  C11  O11  H11  .  .  .  115.0(19)  ?
  O11  C11  C12  .  .  .  122.00(16)  ?
  O11  C11  C16  .  .  .  120.82(14)  ?
  C12  C11  C16  .  .  .  117.16(17)  ?
  C11  C12  C13  .  .  .  120.61(17)  ?
  C11  C12  S2  .  .  .  120.57(15)  ?
  C13  C12  S2  .  .  .  118.66(13)  ?
  C12  C13  C14  .  .  .  122.50(18)  ?
  C12  C13  H13  .  .  .  118.4(16)  ?
  C14  C13  H13  .  .  .  119.1(16)  ?
  C13  C14  C141  .  .  .  122.0(2)  ?
  C13  C14  C15  .  .  .  116.7(2)  ?
  C141  C14  C15  .  .  .  121.3(2)  ?
  C14  C141  C142  .  .  .  105.6(2)  ?
  C14  C141  C143  .  .  .  116.0(3)  ?
  C14  C141  C144  .  .  .  111.5(3)  ?
  C14  C141  C142'  .  .  .  110.3(3)  ?
  C14  C141  C143'  .  .  .  104.4(3)  ?
  C14  C141  C144'  .  .  .  113.4(4)  ?
  C142  C141  C143  .  .  .  109.1(3)  ?
  C142  C141  C144  .  .  .  96.7(3)  ?
  C142  C141  C142'  .  .  .  70.9(2)  ?
  C142  C141  C143'  .  .  .  150.0(3)  ?
  C142  C141  C144'  .  .  .  58.0(3)  ?
  C143  C141  C144  .  .  .  115.7(3)  ?
  C143  C141  C142'  .  .  .  42.4(3)  ?
  C143  C141  C143'  .  .  .  55.1(3)  ?
  C143  C141  C144'  .  .  .  130.5(4)  ?
  C144  C141  C142'  .  .  .  138.2(3)  ?
  C144  C141  C143'  .  .  .  73.2(2)  ?
  C144  C141  C144'  .  .  .  39.2(3)  ?
  C142'  C141  C143'  .  .  .  97.5(3)  ?
  C142'  C141  C144'  .  .  .  119.1(4)  ?
  C143'  C141  C144'  .  .  .  110.1(3)  ?
  C141  C142  C142'  .  .  .  51.2(2)  ?
  C141  C142  C144'  .  .  .  47.3(2)  ?
  C141  C142  H142a  .  .  .  111.6(3)  ?
  C141  C142  H142b  .  .  .  117.1(4)  ?
  C141  C142  H142c  .  .  .  101.9(4)  ?
  C141  C142  H144'c  .  .  .  89.8(3)  ?
  C142'  C142  C144'  .  .  .  92.6(3)  ?
  C142'  C142  H142a  .  .  .  96.7(3)  ?
  C142'  C142  H142b  .  .  .  155.6(5)  ?
  C142'  C142  H142c  .  .  .  59.9(2)  ?
  C142'  C142  H144'c  .  .  .  140.9(3)  ?
  C144'  C142  H142a  .  .  .  87.3(4)  ?
  C144'  C142  H142b  .  .  .  89.3(4)  ?
  C144'  C142  H142c  .  .  .  149.2(5)  ?
  C144'  C142  H144'c  .  .  .  51.2(2)  ?
  H142a  C142  H142b  .  .  .  107.7(5)  ?
  H142a  C142  H142c  .  .  .  108.1(5)  ?
  H142a  C142  H144'c  .  .  .  95.7(4)  ?
  H142b  C142  H142c  .  .  .  110.0(4)  ?
  H142b  C142  H144'c  .  .  .  38.81(17)  ?
  H142c  C142  H144'c  .  .  .  146.8(5)  ?
  C141  C143  C142'  .  .  .  81.4(4)  ?
  C141  C143  C143'  .  .  .  76.0(3)  ?
  C141  C143  H143a  .  .  .  118.2(4)  ?
  C141  C143  H143b  .  .  .  116.6(4)  ?
  C141  C143  H143c  .  .  .  108.4(5)  ?
  C141  C143  H142'a  .  .  .  104.1(3)  ?
  C141  C143  H142'c  .  .  .  107.2(3)  ?
  C142'  C143  C143'  .  .  .  157.3(5)  ?
  C142'  C143  H143a  .  .  .  81.4(5)  ?
  C142'  C143  H143b  .  .  .  53.9(4)  ?
  C142'  C143  H143c  .  .  .  153.4(6)  ?
  C142'  C143  H142'a  .  .  .  45.1(4)  ?
  C142'  C143  H142'c  .  .  .  39.9(3)  ?
  C143'  C143  H143a  .  .  .  107.5(4)  ?
  C143'  C143  H143b  .  .  .  140.6(5)  ?
  C143'  C143  H143c  .  .  .  42.3(3)  ?
  C143'  C143  H142'a  .  .  .  140.0(4)  ?
  C143'  C143  H142'c  .  .  .  152.2(5)  ?
  H143a  C143  H143b  .  .  .  98.7(5)  ?
  H143a  C143  H143c  .  .  .  113.0(4)  ?
  H143a  C143  H142'a  .  .  .  36.3(2)  ?
  H143a  C143  H142'c  .  .  .  95.3(4)  ?
  H143b  C143  H143c  .  .  .  100.6(4)  ?
  H143b  C143  H142'a  .  .  .  76.1(4)  ?
  H143b  C143  H142'c  .  .  .  14.02(10)  ?
  H143c  C143  H142'a  .  .  .  144.8(4)  ?
  H143c  C143  H142'c  .  .  .  114.2(4)  ?
  H142'a  C143  H142'c  .  .  .  67.1(2)  ?
  C141  C144  C143'  .  .  .  55.8(2)  ?
  C141  C144  C144'  .  .  .  54.4(4)  ?
  C141  C144  H144a  .  .  .  106.5(4)  ?
  C141  C144  H144b  .  .  .  105.0(4)  ?
  C141  C144  H144c  .  .  .  116.6(4)  ?
  C141  C144  H144'a  .  .  .  78.9(2)  ?
  C141  C144  H144'b  .  .  .  95.4(3)  ?
  C143'  C144  C144'  .  .  .  107.7(4)  ?
  C143'  C144  H144a  .  .  .  96.7(3)  ?
  C143'  C144  H144b  .  .  .  55.9(2)  ?
  C143'  C144  H144c  .  .  .  146.4(5)  ?
  C143'  C144  H144'a  .  .  .  110.0(3)  ?
  C143'  C144  H144'b  .  .  .  148.1(4)  ?
  C144'  C144  H144a  .  .  .  86.2(6)  ?
  C144'  C144  H144b  .  .  .  158.2(7)  ?
  C144'  C144  H144c  .  .  .  83.1(4)  ?
  C144'  C144  H144'a  .  .  .  40.8(4)  ?
  C144'  C144  H144'b  .  .  .  52.8(3)  ?
  H144a  C144  H144b  .  .  .  108.6(4)  ?
  H144a  C144  H144c  .  .  .  116.0(5)  ?
  H144a  C144  H144'a  .  .  .  45.6(2)  ?
  H144a  C144  H144'b  .  .  .  105.6(4)  ?
  H144b  C144  H144c  .  .  .  103.5(5)  ?
  H144b  C144  H144'a  .  .  .  152.2(4)  ?
  H144b  C144  H144'b  .  .  .  132.7(5)  ?
  H144c  C144  H144'a  .  .  .  98.9(3)  ?
  H144c  C144  H144'b  .  .  .  30.58(12)  ?
  H144'a  C144  H144'b  .  .  .  72.9(2)  ?
  C141  C142'  C142  .  .  .  57.9(2)  ?
  C141  C142'  C143  .  .  .  56.3(3)  ?
  C141  C142'  H143a  .  .  .  85.8(3)  ?
  C141  C142'  H143b  .  .  .  98.6(4)  ?
  C141  C142'  H142'a  .  .  .  111.3(4)  ?
  C141  C142'  H142'b  .  .  .  105.0(3)  ?
  C141  C142'  H142'c  .  .  .  123.8(5)  ?
  C142  C142'  C143  .  .  .  109.5(4)  ?
  C142  C142'  H143a  .  .  .  107.8(3)  ?
  C142  C142'  H143b  .  .  .  154.1(5)  ?
  C142  C142'  H142'a  .  .  .  97.5(4)  ?
  C142  C142'  H142'b  .  .  .  54.9(2)  ?
  C142  C142'  H142'c  .  .  .  147.1(4)  ?
  C143  C142'  H143a  .  .  .  46.8(3)  ?
  C143  C142'  H143b  .  .  .  55.8(3)  ?
  C143  C142'  H142'a  .  .  .  84.7(4)  ?
  C143  C142'  H142'b  .  .  .  161.1(6)  ?
  C143  C142'  H142'c  .  .  .  91.7(4)  ?
  H143a  C142'  H143b  .  .  .  78.2(3)  ?
  H143a  C142'  H142'a  .  .  .  37.91(15)  ?
  H143a  C142'  H142'b  .  .  .  142.6(5)  ?
  H143a  C142'  H142'c  .  .  .  105.0(3)  ?
  H143b  C142'  H142'a  .  .  .  101.6(4)  ?
  H143b  C142'  H142'b  .  .  .  133.0(6)  ?
  H143b  C142'  H142'c  .  .  .  35.9(2)  ?
  H142'a  C142'  H142'b  .  .  .  106.6(5)  ?
  H142'a  C142'  H142'c  .  .  .  109.6(5)  ?
  H142'b  C142'  H142'c  .  .  .  98.4(4)  ?
  C141  C143'  C143  .  .  .  48.9(2)  ?
  C141  C143'  C144  .  .  .  51.0(2)  ?
  C141  C143'  H143c  .  .  .  87.0(3)  ?
  C141  C143'  H143'a  .  .  .  107.4(4)  ?
  C141  C143'  H143'b  .  .  .  120.0(4)  ?
  C141  C143'  H143'c  .  .  .  106.5(3)  ?
  C143  C143'  C144  .  .  .  91.8(3)  ?
  C143  C143'  H143c  .  .  .  45.6(3)  ?
  C143  C143'  H143'a  .  .  .  85.2(4)  ?
  C143  C143'  H143'b  .  .  .  88.0(4)  ?
  C143  C143'  H143'c  .  .  .  155.3(4)  ?
  C144  C143'  H143c  .  .  .  136.5(4)  ?
  C144  C143'  H143'a  .  .  .  88.0(4)  ?
  C144  C143'  H143'b  .  .  .  164.2(5)  ?
  C144  C143'  H143'c  .  .  .  65.6(3)  ?
  H143c  C143'  H143'a  .  .  .  95.6(5)  ?
  H143c  C143'  H143'b  .  .  .  42.6(2)  ?
  H143c  C143'  H143'c  .  .  .  152.1(6)  ?
  H143'a  C143'  H143'b  .  .  .  107.7(4)  ?
  H143'a  C143'  H143'c  .  .  .  103.1(5)  ?
  H143'b  C143'  H143'c  .  .  .  110.9(5)  ?
  C141  C144'  C142  .  .  .  74.7(3)  ?
  C141  C144'  C144  .  .  .  86.4(5)  ?
  C141  C144'  H144a  .  .  .  104.1(3)  ?
  C141  C144'  H144c  .  .  .  114.1(5)  ?
  C141  C144'  H144'a  .  .  .  118.0(5)  ?
  C141  C144'  H144'b  .  .  .  127.6(7)  ?
  C141  C144'  H144'c  .  .  .  109.4(4)  ?
  C142  C144'  C144  .  .  .  158.7(5)  ?
  C142  C144'  H144a  .  .  .  128.7(6)  ?
  C142  C144'  H144c  .  .  .  153.5(5)  ?
  C142  C144'  H144'a  .  .  .  88.4(6)  ?
  C142  C144'  H144'b  .  .  .  132.9(5)  ?
  C142  C144'  H144'c  .  .  .  46.4(3)  ?
  C144  C144'  H144a  .  .  .  46.3(4)  ?
  C144  C144'  H144c  .  .  .  45.1(4)  ?
  C144  C144'  H144'a  .  .  .  91.9(6)  ?
  C144  C144'  H144'b  .  .  .  67.0(5)  ?
  C144  C144'  H144'c  .  .  .  153.9(7)  ?
  H144a  C144'  H144c  .  .  .  75.1(3)  ?
  H144a  C144'  H144'a  .  .  .  45.8(3)  ?
  H144a  C144'  H144'b  .  .  .  89.4(4)  ?
  H144a  C144'  H144'c  .  .  .  140.2(5)  ?
  H144c  C144'  H144'a  .  .  .  107.0(5)  ?
  H144c  C144'  H144'b  .  .  .  22.14(17)  ?
  H144c  C144'  H144'c  .  .  .  108.8(4)  ?
  H144'a  C144'  H144'b  .  .  .  107.6(5)  ?
  H144'a  C144'  H144'c  .  .  .  98.2(5)  ?
  H144'b  C144'  H144'c  .  .  .  86.9(3)  ?
  C14  C15  C16  .  .  .  122.26(18)  ?
  C14  C15  H15  .  .  .  121.3(15)  ?
  C16  C15  H15  .  .  .  116.4(15)  ?
  C11  C16  C15  .  .  .  120.76(15)  ?
  C11  C16  S1  .  .  .  120.40(14)  ?
  C15  C16  S1  .  .  .  118.63(13)  ?
  C16  S1  C42  .  .  .  103.13(7)  ?
  Li2  O21  C21  .  .  .  124.50(12)  ?
  Li2  O21  H11  .  .  .  106.5(15)  ?
  C21  O21  H11  .  .  .  112.5(14)  ?
  O21  C21  C22  .  .  .  121.21(16)  ?
  O21  C21  C26  .  .  .  121.95(13)  ?
  C22  C21  C26  .  .  .  116.83(13)  ?
  C21  C22  C23  .  .  .  121.04(17)  ?
  C21  C22  S3  .  .  .  120.61(11)  ?
  C23  C22  S3  .  .  .  118.33(12)  ?
  C22  C23  C24  .  .  .  122.39(15)  ?
  C22  C23  H23  .  .  .  117.0(13)  ?
  C24  C23  H23  .  .  .  120.6(13)  ?
  C23  C24  C241  .  .  .  120.96(15)  ?
  C23  C24  C25  .  .  .  116.58(14)  ?
  C241  C24  C25  .  .  .  122.40(17)  ?
  C24  C241  C242  .  .  .  108.37(16)  ?
  C24  C241  C243  .  .  .  111.50(17)  ?
  C24  C241  C244  .  .  .  111.38(16)  ?
  C242  C241  C243  .  .  .  109.9(2)  ?
  C242  C241  C244  .  .  .  107.64(19)  ?
  C243  C241  C244  .  .  .  107.96(18)  ?
  C241  C242  H242a  .  .  .  111(2)  ?
  C241  C242  H242b  .  .  .  113(2)  ?
  C241  C242  H242c  .  .  .  109(2)  ?
  H242a  C242  H242b  .  .  .  112(3)  ?
  H242a  C242  H242c  .  .  .  107(3)  ?
  H242b  C242  H242c  .  .  .  103(3)  ?
  C241  C243  H243a  .  .  .  110(2)  ?
  C241  C243  H243b  .  .  .  115(3)  ?
  C241  C243  H243c  .  .  .  105(2)  ?
  H243a  C243  H243b  .  .  .  111(3)  ?
  H243a  C243  H243c  .  .  .  104(2)  ?
  H243b  C243  H243c  .  .  .  111(3)  ?
  C241  C244  H244a  .  .  .  110.4(15)  ?
  C241  C244  H244b  .  .  .  111.3(16)  ?
  C241  C244  H244c  .  .  .  112.7(15)  ?
  H244a  C244  H244b  .  .  .  107(2)  ?
  H244a  C244  H244c  .  .  .  110(2)  ?
  H244b  C244  H244c  .  .  .  105(3)  ?
  C24  C25  C26  .  .  .  122.16(18)  ?
  C24  C25  H25  .  .  .  120.9(11)  ?
  C26  C25  H25  .  .  .  116.8(10)  ?
  C21  C26  C25  .  .  .  120.99(14)  ?
  C21  C26  S2  .  .  .  120.28(10)  ?
  C25  C26  S2  .  .  .  118.65(14)  ?
  C12  S2  C26  .  .  .  102.51(8)  ?
  Li2  O31  C31  .  .  .  127.47(12)  ?
  Li2  O31  H31  .  .  .  115.0(17)  ?
  C31  O31  H31  .  .  .  109.7(17)  ?
  O31  C31  C32  .  .  .  122.91(13)  ?
  O31  C31  C36  .  .  .  120.30(14)  ?
  C32  C31  C36  .  .  .  116.77(12)  ?
  C31  C32  C33  .  .  .  120.76(14)  ?
  C31  C32  S4  .  .  .  120.53(10)  ?
  C33  C32  S4  .  .  .  118.41(12)  ?
  C32  C33  C34  .  .  .  122.38(16)  ?
  C32  C33  H33  .  .  .  115.9(11)  ?
  C34  C33  H33  .  .  .  121.6(11)  ?
  C33  C34  C341  .  .  .  124.11(16)  ?
  C33  C34  C35  .  .  .  116.51(13)  ?
  C341  C34  C35  .  .  .  119.36(15)  ?
  C34  C341  C342  .  .  .  108.81(18)  ?
  C34  C341  C343  .  .  .  109.56(16)  ?
  C34  C341  C344  .  .  .  111.77(15)  ?
  C342  C341  C343  .  .  .  109.61(18)  ?
  C342  C341  C344  .  .  .  107.77(18)  ?
  C343  C341  C344  .  .  .  109.3(2)  ?
  C341  C342  H342a  .  .  .  112(2)  ?
  C341  C342  H342b  .  .  .  112.1(18)  ?
  C341  C342  H342c  .  .  .  109.2(18)  ?
  H342a  C342  H342b  .  .  .  108(2)  ?
  H342a  C342  H342c  .  .  .  108(2)  ?
  H342b  C342  H342c  .  .  .  108(2)  ?
  C341  C343  H343a  .  .  .  110.9(18)  ?
  C341  C343  H343b  .  .  .  111.0(17)  ?
  C341  C343  H343c  .  .  .  109.5(16)  ?
  H343a  C343  H343b  .  .  .  107(2)  ?
  H343a  C343  H343c  .  .  .  108(3)  ?
  H343b  C343  H343c  .  .  .  110(2)  ?
  C341  C344  H344a  .  .  .  107.5(18)  ?
  C341  C344  H344b  .  .  .  108.9(13)  ?
  C341  C344  H344c  .  .  .  114.7(17)  ?
  H344a  C344  H344b  .  .  .  102(2)  ?
  H344a  C344  H344c  .  .  .  112(2)  ?
  H344b  C344  H344c  .  .  .  110(2)  ?
  C34  C35  C36  .  .  .  122.38(15)  ?
  C34  C35  H35  .  .  .  119.3(11)  ?
  C36  C35  H35  .  .  .  118.3(11)  ?
  C31  C36  C35  .  .  .  121.15(15)  ?
  C31  C36  S3  .  .  .  119.59(10)  ?
  C35  C36  S3  .  .  .  119.23(12)  ?
  C22  S3  C36  .  .  .  100.71(9)  ?
  Li1  O41  C41  .  .  .  127.79(16)  ?
  Li1  O41  H31  .  .  .  110.0(14)  ?
  C41  O41  H31  .  .  .  114.3(14)  ?
  O41  C41  C42  .  .  .  121.08(14)  ?
  O41  C41  C46  .  .  .  122.67(17)  ?
  C42  C41  C46  .  .  .  116.25(16)  ?
  S1  C42  C41  .  .  .  119.20(13)  ?
  S1  C42  C43  .  .  .  119.03(14)  ?
  C41  C42  C43  .  .  .  121.72(15)  ?
  C42  C43  C44  .  .  .  121.8(2)  ?
  C42  C43  H43  .  .  .  116.7(12)  ?
  C44  C43  H43  .  .  .  121.4(12)  ?
  C43  C44  C441  .  .  .  123.2(2)  ?
  C43  C44  C45  .  .  .  116.60(19)  ?
  C441  C44  C45  .  .  .  120.22(16)  ?
  C44  C441  C442  .  .  .  109.2(2)  ?
  C44  C441  C443  .  .  .  109.2(2)  ?
  C44  C441  C444  .  .  .  111.94(18)  ?
  C442  C441  C443  .  .  .  109.75(19)  ?
  C442  C441  C444  .  .  .  107.9(2)  ?
  C443  C441  C444  .  .  .  108.8(2)  ?
  C441  C442  H442a  .  .  .  108(2)  ?
  C441  C442  H442b  .  .  .  111.8(19)  ?
  C441  C442  H442c  .  .  .  112.4(16)  ?
  H442a  C442  H442b  .  .  .  110(3)  ?
  H442a  C442  H442c  .  .  .  107(3)  ?
  H442b  C442  H442c  .  .  .  108(3)  ?
  C441  C443  H443a  .  .  .  111.3(17)  ?
  C441  C443  H443b  .  .  .  113.7(14)  ?
  C441  C443  H443c  .  .  .  112.0(14)  ?
  H443a  C443  H443b  .  .  .  109(3)  ?
  H443a  C443  H443c  .  .  .  107(3)  ?
  H443b  C443  H443c  .  .  .  104(2)  ?
  C441  C444  H444a  .  .  .  110(2)  ?
  C441  C444  H444b  .  .  .  107.5(15)  ?
  C441  C444  H444c  .  .  .  112(2)  ?
  H444a  C444  H444b  .  .  .  107(2)  ?
  H444a  C444  H444c  .  .  .  106(3)  ?
  H444b  C444  H444c  .  .  .  114(2)  ?
  C44  C45  C46  .  .  .  122.66(15)  ?
  C44  C45  H45  .  .  .  118.9(18)  ?
  C46  C45  H45  .  .  .  118.4(18)  ?
  C41  C46  C45  .  .  .  120.88(18)  ?
  C41  C46  S4  .  .  .  120.57(15)  ?
  C45  C46  S4  .  .  .  118.44(12)  ?
  C32  S4  C46  .  .  .  104.67(8)  ?
  Li1  O01  Li2  .  .  .  108.24(13)  ?
  Li1  O01  H01a  .  .  .  102(2)  ?
  Li1  O01  H01b  .  .  .  121.9(19)  ?
  Li2  O01  H01a  .  .  .  109.7(15)  ?
  Li2  O01  H01b  .  .  .  110.0(15)  ?
  H01a  O01  H01b  .  .  .  105(2)  ?
  Li2  O02  H02a  .  .  .  123(2)  ?
  Li2  O02  H02b  .  .  .  125(2)  ?
  H02a  O02  H02b  .  .  .  105(3)  ?
  C102  O101  C105  .  .  .  109.3(6)  ?
  C102  O101  O101'  .  .  .  79.0(7)  ?
  C102  O101  C102'  .  .  .  30.7(5)  ?
  C102  O101  C105'  .  .  .  101.9(6)  ?
  C102  O101  H102'a  .  .  .  73.3(4)  ?
  C102  O101  H105'a  .  .  .  118.4(5)  ?
  C105  O101  O101'  .  .  .  48.3(7)  ?
  C105  O101  C102'  .  .  .  102.8(9)  ?
  C105  O101  C105'  .  .  .  37.8(5)  ?
  C105  O101  H102'a  .  .  .  119.6(6)  ?
  C105  O101  H105'a  .  .  .  67.6(5)  ?
  O101'  O101  C102'  .  .  .  58.5(9)  ?
  O101'  O101  C105'  .  .  .  79.5(8)  ?
  O101'  O101  H102'a  .  .  .  75.6(7)  ?
  O101'  O101  H105'a  .  .  .  114.9(8)  ?
  C102'  O101  C105'  .  .  .  115.8(9)  ?
  C102'  O101  H102'a  .  .  .  49.2(6)  ?
  C102'  O101  H105'a  .  .  .  145.3(7)  ?
  C105'  O101  H102'a  .  .  .  155.1(8)  ?
  C105'  O101  H105'a  .  .  .  37.3(5)  ?
  H102'a  O101  H105'a  .  .  .  164.8(7)  ?
  O101  C102  C103  .  .  .  106.3(6)  ?
  O101  C102  C102'  .  .  .  67.1(11)  ?
  O101  C102  C103'  .  .  .  93.7(8)  ?
  O101  C102  H102a  .  .  .  114.4(8)  ?
  O101  C102  H102b  .  .  .  97.4(5)  ?
  O101  C102  H102'a  .  .  .  35.6(3)  ?
  C103  C102  C102'  .  .  .  87.1(15)  ?
  C103  C102  C103'  .  .  .  38.7(7)  ?
  C103  C102  H102a  .  .  .  122.5(7)  ?
  C103  C102  H102b  .  .  .  104.0(6)  ?
  C103  C102  H102'a  .  .  .  116.8(5)  ?
  C102'  C102  C103'  .  .  .  116.2(16)  ?
  C102'  C102  H102a  .  .  .  145.2(18)  ?
  C102'  C102  H102b  .  .  .  40.4(12)  ?
  C102'  C102  H102'a  .  .  .  40.3(12)  ?
  C103'  C102  H102a  .  .  .  98.6(8)  ?
  C103'  C102  H102b  .  .  .  142.7(10)  ?
  C103'  C102  H102'a  .  .  .  124.0(7)  ?
  H102a  C102  H102b  .  .  .  108.8(9)  ?
  H102a  C102  H102'a  .  .  .  120.1(8)  ?
  H102b  C102  H102'a  .  .  .  62.0(3)  ?
  C102  C103  C104  .  .  .  104.1(6)  ?
  C102  C103  O101'  .  .  .  80.1(8)  ?
  C102  C103  C102'  .  .  .  29.1(6)  ?
  C102  C103  C103'  .  .  .  80.4(14)  ?
  C102  C103  C104'  .  .  .  101.5(7)  ?
  C102  C103  H103a  .  .  .  105.1(7)  ?
  C102  C103  H103b  .  .  .  116.3(7)  ?
  C102  C103  H103'b  .  .  .  101.0(6)  ?
  C102  C103  H104'b  .  .  .  136.9(6)  ?
  C104  C103  O101'  .  .  .  60.8(7)  ?
  C104  C103  C102'  .  .  .  100.7(7)  ?
  C104  C103  C103'  .  .  .  58.1(11)  ?
  C104  C103  C104'  .  .  .  27.9(4)  ?
  C104  C103  H103a  .  .  .  112.6(7)  ?
  C104  C103  H103b  .  .  .  106.7(6)  ?
  C104  C103  H103'b  .  .  .  102.6(6)  ?
  C104  C103  H104'b  .  .  .  34.7(4)  ?
  O101'  C103  C102'  .  .  .  55.8(9)  ?
  O101'  C103  C103'  .  .  .  107.5(11)  ?
  O101'  C103  C104'  .  .  .  87.1(7)  ?
  O101'  C103  H103a  .  .  .  172.8(10)  ?
  O101'  C103  H103b  .  .  .  69.1(7)  ?
  O101'  C103  H103'b  .  .  .  162.8(9)  ?
  O101'  C103  H104'b  .  .  .  83.9(7)  ?
  C102'  C103  C103'  .  .  .  102.8(14)  ?
  C102'  C103  C104'  .  .  .  112.1(8)  ?
  C102'  C103  H103a  .  .  .  130.7(9)  ?
  C102'  C103  H103b  .  .  .  90.7(7)  ?
  C102'  C103  H103'b  .  .  .  129.1(8)  ?
  C102'  C103  H104'b  .  .  .  134.2(7)  ?
  C103'  C103  C104'  .  .  .  32.5(11)  ?
  C103'  C103  H103a  .  .  .  69.0(10)  ?
  C103'  C103  H103b  .  .  .  161.0(16)  ?
  C103'  C103  H103'b  .  .  .  56.3(9)  ?
  C103'  C103  H104'b  .  .  .  66.7(13)  ?
  C104'  C103  H103a  .  .  .  87.0(6)  ?
  C104'  C103  H103b  .  .  .  129.6(8)  ?
  C104'  C103  H103'b  .  .  .  75.9(5)  ?
  C104'  C103  H104'b  .  .  .  37.6(4)  ?
  H103a  C103  H103b  .  .  .  112.0(7)  ?
  H103a  C103  H103'b  .  .  .  12.73(8)  ?
  H103a  C103  H104'b  .  .  .  88.9(6)  ?
  H103b  C103  H103'b  .  .  .  123.9(8)  ?
  H103b  C103  H104'b  .  .  .  94.3(6)  ?
  H103'b  C103  H104'b  .  .  .  83.8(5)  ?
  C103  C104  C105  .  .  .  102.6(7)  ?
  C103  C104  O101'  .  .  .  66.0(7)  ?
  C103  C104  C103'  .  .  .  38.2(8)  ?
  C103  C104  C104'  .  .  .  59.1(8)  ?
  C103  C104  C105'  .  .  .  101.0(8)  ?
  C103  C104  H104a  .  .  .  102.8(6)  ?
  C103  C104  H104b  .  .  .  110.7(7)  ?
  C103  C104  H104'b  .  .  .  59.9(5)  ?
  C105  C104  O101'  .  .  .  50.5(7)  ?
  C105  C104  C103'  .  .  .  108.2(11)  ?
  C105  C104  C104'  .  .  .  124.2(13)  ?
  C105  C104  C105'  .  .  .  38.3(5)  ?
  C105  C104  H104a  .  .  .  104.5(8)  ?
  C105  C104  H104b  .  .  .  128.1(7)  ?
  C105  C104  H104'b  .  .  .  155.8(9)  ?
  O101'  C104  C103'  .  .  .  96.1(11)  ?
  O101'  C104  C104'  .  .  .  121.2(12)  ?
  O101'  C104  C105'  .  .  .  80.8(9)  ?
  O101'  C104  H104a  .  .  .  144.0(11)  ?
  O101'  C104  H104b  .  .  .  110.5(9)  ?
  O101'  C104  H104'b  .  .  .  105.3(9)  ?
  C103'  C104  C104'  .  .  .  25.1(10)  ?
  C103'  C104  C105'  .  .  .  83.6(10)  ?
  C103'  C104  H104a  .  .  .  64.8(8)  ?
  C103'  C104  H104b  .  .  .  122.7(11)  ?
  C103'  C104  H104'b  .  .  .  69.5(9)  ?
  C104'  C104  C105'  .  .  .  90.1(11)  ?
  C104'  C104  H104a  .  .  .  45.9(7)  ?
  C104'  C104  H104b  .  .  .  107.1(12)  ?
  C104'  C104  H104'b  .  .  .  63.8(8)  ?
  C105'  C104  H104a  .  .  .  67.5(6)  ?
  C105'  C104  H104b  .  .  .  148.2(9)  ?
  C105'  C104  H104'b  .  .  .  152.8(9)  ?
  H104a  C104  H104b  .  .  .  105.4(8)  ?
  H104a  C104  H104'b  .  .  .  96.2(6)  ?
  H104b  C104  H104'b  .  .  .  55.1(5)  ?
  O101  C105  C104  .  .  .  105.6(6)  ?
  O101  C105  O101'  .  .  .  79.4(10)  ?
  O101  C105  C104'  .  .  .  88.8(5)  ?
  O101  C105  C105'  .  .  .  67.3(10)  ?
  O101  C105  H105a  .  .  .  126.0(9)  ?
  O101  C105  H105b  .  .  .  107.0(6)  ?
  O101  C105  H105'a  .  .  .  41.6(3)  ?
  O101  C105  H105'b  .  .  .  114.7(7)  ?
  C104  C105  O101'  .  .  .  78.5(9)  ?
  C104  C105  C104'  .  .  .  19.0(4)  ?
  C104  C105  C105'  .  .  .  73.4(9)  ?
  C104  C105  H105a  .  .  .  117.9(9)  ?
  C104  C105  H105b  .  .  .  99.8(7)  ?
  C104  C105  H105'a  .  .  .  103.6(5)  ?
  C104  C105  H105'b  .  .  .  90.7(6)  ?
  O101'  C105  C104'  .  .  .  83.7(8)  ?
  O101'  C105  C105'  .  .  .  127.8(11)  ?
  O101'  C105  H105a  .  .  .  137.1(10)  ?
  O101'  C105  H105b  .  .  .  41.1(7)  ?
  O101'  C105  H105'a  .  .  .  120.1(11)  ?
  O101'  C105  H105'b  .  .  .  164.3(13)  ?
  C104'  C105  C105'  .  .  .  57.5(8)  ?
  C104'  C105  H105a  .  .  .  125.2(8)  ?
  C104'  C105  H105b  .  .  .  113.9(6)  ?
  C104'  C105  H105'a  .  .  .  85.2(4)  ?
  C104'  C105  H105'b  .  .  .  89.6(5)  ?
  C105'  C105  H105a  .  .  .  95.1(10)  ?
  C105'  C105  H105b  .  .  .  168.8(11)  ?
  C105'  C105  H105'a  .  .  .  34.6(9)  ?
  C105'  C105  H105'b  .  .  .  57.8(8)  ?
  H105a  C105  H105b  .  .  .  96.1(6)  ?
  H105a  C105  H105'a  .  .  .  95.5(7)  ?
  H105a  C105  H105'b  .  .  .  40.2(3)  ?
  H105b  C105  H105'a  .  .  .  145.0(8)  ?
  H105b  C105  H105'b  .  .  .  132.3(7)  ?
  H105'a  C105  H105'b  .  .  .  73.3(4)  ?
  O101  O101'  C103  .  .  .  77.7(7)  ?
  O101  O101'  C104  .  .  .  79.0(8)  ?
  O101  O101'  C105  .  .  .  52.3(8)  ?
  O101  O101'  C102'  .  .  .  46.5(8)  ?
  O101  O101'  H105b  .  .  .  96.4(14)  ?
  C103  O101'  C104  .  .  .  53.2(6)  ?
  C103  O101'  C105  .  .  .  92.6(9)  ?
  C103  O101'  C102'  .  .  .  53.2(7)  ?
  C103  O101'  H105b  .  .  .  142.3(16)  ?
  C104  O101'  C105  .  .  .  51.1(7)  ?
  C104  O101'  C102'  .  .  .  92.8(9)  ?
  C104  O101'  H105b  .  .  .  89.1(14)  ?
  C105  O101'  C102'  .  .  .  95.2(12)  ?
  C105  O101'  H105b  .  .  .  57.2(10)  ?
  C102'  O101'  H105b  .  .  .  141(2)  ?
  O101  C102'  C102  .  .  .  82.2(12)  ?
  O101  C102'  C103  .  .  .  103.3(10)  ?
  O101  C102'  O101'  .  .  .  75.0(10)  ?
  O101  C102'  H102a  .  .  .  85.8(7)  ?
  O101  C102'  H102b  .  .  .  136(2)  ?
  O101  C102'  H102'a  .  .  .  41.4(5)  ?
  O101  C102'  H102'b  .  .  .  140.5(11)  ?
  C102  C102'  C103  .  .  .  63.8(13)  ?
  C102  C102'  O101'  .  .  .  122.3(18)  ?
  C102  C102'  H102a  .  .  .  18.1(10)  ?
  C102  C102'  H102b  .  .  .  95.6(16)  ?
  C102  C102'  H102'a  .  .  .  111.4(17)  ?
  C102  C102'  H102'b  .  .  .  137.2(17)  ?
  C103  C102'  O101'  .  .  .  71.0(10)  ?
  C103  C102'  H102a  .  .  .  79.8(6)  ?
  C103  C102'  H102b  .  .  .  115.4(14)  ?
  C103  C102'  H102'a  .  .  .  142.4(13)  ?
  C103  C102'  H102'b  .  .  .  99.1(12)  ?
  O101'  C102'  H102a  .  .  .  139.8(12)  ?
  O101'  C102'  H102b  .  .  .  136.6(15)  ?
  O101'  C102'  H102'a  .  .  .  84.2(10)  ?
  O101'  C102'  H102'b  .  .  .  82.2(11)  ?
  H102a  C102'  H102b  .  .  .  80.8(11)  ?
  H102a  C102'  H102'a  .  .  .  104.4(11)  ?
  H102a  C102'  H102'b  .  .  .  130.4(12)  ?
  H102b  C102'  H102'a  .  .  .  102.0(17)  ?
  H102b  C102'  H102'b  .  .  .  54.6(9)  ?
  H102'a  C102'  H102'b  .  .  .  105.1(11)  ?
  C102  C103'  C103  .  .  .  60.9(11)  ?
  C102  C103'  C104  .  .  .  106.9(10)  ?
  C102  C103'  C104'  .  .  .  130.7(16)  ?
  C102  C103'  C105'  .  .  .  79.9(9)  ?
  C102  C103'  H103a  .  .  .  86.8(12)  ?
  C102  C103'  H104a  .  .  .  128.6(12)  ?
  C102  C103'  H103'a  .  .  .  73.7(13)  ?
  C102  C103'  H103'b  .  .  .  92.0(14)  ?
  C102  C103'  H104'a  .  .  .  155.3(15)  ?
  C102  C103'  H104'b  .  .  .  124.4(10)  ?
  C103  C103'  C104  .  .  .  83.8(12)  ?
  C103  C103'  C104'  .  .  .  102.5(19)  ?
  C103  C103'  C105'  .  .  .  105.9(11)  ?
  C103  C103'  H103a  .  .  .  52.5(9)  ?
  C103  C103'  H104a  .  .  .  128.5(16)  ?
  C103  C103'  H103'a  .  .  .  131(2)  ?
  C103  C103'  H103'b  .  .  .  61.8(11)  ?
  C103  C103'  H104'a  .  .  .  141(2)  ?
  C103  C103'  H104'b  .  .  .  70.8(12)  ?
  C104  C103'  C104'  .  .  .  24.9(8)  ?
  C104  C103'  C105'  .  .  .  49.7(7)  ?
  C104  C103'  H103a  .  .  .  120.3(16)  ?
  C104  C103'  H104a  .  .  .  44.9(7)  ?
  C104  C103'  H103'a  .  .  .  128.6(15)  ?
  C104  C103'  H103'b  .  .  .  125.8(18)  ?
  C104  C103'  H104'a  .  .  .  73.0(10)  ?
  C104  C103'  H104'b  .  .  .  39.3(6)  ?
  C104'  C103'  C105'  .  .  .  59.4(13)  ?
  C104'  C103'  H103a  .  .  .  121(2)  ?
  C104'  C103'  H104a  .  .  .  28.0(9)  ?
  C104'  C103'  H103'a  .  .  .  121(2)  ?
  C104'  C103'  H103'b  .  .  .  122(3)  ?
  C104'  C103'  H104'a  .  .  .  48.6(11)  ?
  C104'  C103'  H104'b  .  .  .  38.3(11)  ?
  C105'  C103'  H103a  .  .  .  158.4(12)  ?
  C105'  C103'  H104a  .  .  .  48.8(6)  ?
  C105'  C103'  H103'a  .  .  .  81.5(11)  ?
  C105'  C103'  H103'b  .  .  .  167.7(14)  ?
  C105'  C103'  H104'a  .  .  .  82.1(9)  ?
  C105'  C103'  H104'b  .  .  .  88.9(9)  ?
  H103a  C103'  H104a  .  .  .  142(2)  ?
  H103a  C103'  H103'a  .  .  .  111.1(15)  ?
  H103a  C103'  H103'b  .  .  .  9.3(2)  ?
  H103a  C103'  H104'a  .  .  .  115.0(15)  ?
  H103a  C103'  H104'b  .  .  .  84.6(13)  ?
  H104a  C103'  H103'a  .  .  .  93.3(13)  ?
  H104a  C103'  H103'b  .  .  .  139(2)  ?
  H104a  C103'  H104'a  .  .  .  35.5(5)  ?
  H104a  C103'  H104'b  .  .  .  65.7(9)  ?
  H103'a  C103'  H103'b  .  .  .  105.3(15)  ?
  H103'a  C103'  H104'a  .  .  .  87.1(11)  ?
  H103'a  C103'  H104'b  .  .  .  157.9(17)  ?
  H103'b  C103'  H104'a  .  .  .  108.2(15)  ?
  H103'b  C103'  H104'b  .  .  .  88.0(15)  ?
  H104'a  C103'  H104'b  .  .  .  71.8(11)  ?
  C103  C104'  C104  .  .  .  93.0(9)  ?
  C103  C104'  C105  .  .  .  89.0(5)  ?
  C103  C104'  C103'  .  .  .  45.0(13)  ?
  C103  C104'  C105'  .  .  .  102.8(7)  ?
  C103  C104'  H104a  .  .  .  160.5(11)  ?
  C103  C104'  H104b  .  .  .  101.6(6)  ?
  C103  C104'  H103'b  .  .  .  40.4(3)  ?
  C103  C104'  H104'a  .  .  .  133.0(7)  ?
  C103  C104'  H104'b  .  .  .  72.1(6)  ?
  C104  C104'  C105  .  .  .  36.8(9)  ?
  C104  C104'  C103'  .  .  .  129.9(17)  ?
  C104  C104'  C105'  .  .  .  62.2(10)  ?
  C104  C104'  H104a  .  .  .  87.1(10)  ?
  C104  C104'  H104b  .  .  .  40.7(9)  ?
  C104  C104'  H103'b  .  .  .  131.2(10)  ?
  C104  C104'  H104'a  .  .  .  132.9(12)  ?
  C104  C104'  H104'b  .  .  .  67.1(9)  ?
  C105  C104'  C103'  .  .  .  104.9(15)  ?
  C105  C104'  C105'  .  .  .  28.8(4)  ?
  C105  C104'  H104a  .  .  .  79.5(6)  ?
  C105  C104'  H104b  .  .  .  77.3(4)  ?
  C105  C104'  H103'b  .  .  .  126.6(6)  ?
  C105  C104'  H104'a  .  .  .  132.1(7)  ?
  C105  C104'  H104'b  .  .  .  100.5(5)  ?
  C103'  C104'  C105'  .  .  .  96.8(17)  ?
  C103'  C104'  H104a  .  .  .  123.1(17)  ?
  C103'  C104'  H104b  .  .  .  145.6(15)  ?
  C103'  C104'  H103'b  .  .  .  32.3(15)  ?
  C103'  C104'  H104'a  .  .  .  95.6(13)  ?
  C103'  C104'  H104'b  .  .  .  110.0(16)  ?
  C105'  C104'  H104a  .  .  .  60.3(6)  ?
  C105'  C104'  H104b  .  .  .  99.2(5)  ?
  C105'  C104'  H103'b  .  .  .  127.9(7)  ?
  C105'  C104'  H104'a  .  .  .  107.1(7)  ?
  C105'  C104'  H104'b  .  .  .  128.7(6)  ?
  H104a  C104'  H104b  .  .  .  91.2(7)  ?
  H104a  C104'  H103'b  .  .  .  141.4(7)  ?
  H104a  C104'  H104'a  .  .  .  53.3(4)  ?
  H104a  C104'  H104'b  .  .  .  125.2(11)  ?
  H104b  C104'  H103'b  .  .  .  119.8(6)  ?
  H104b  C104'  H104'a  .  .  .  108.3(7)  ?
  H104b  C104'  H104'b  .  .  .  38.1(3)  ?
  H103'b  C104'  H104'a  .  .  .  92.8(4)  ?
  H103'b  C104'  H104'b  .  .  .  81.7(5)  ?
  H104'a  C104'  H104'b  .  .  .  112.5(9)  ?
  O101  C105'  C104  .  .  .  106.7(8)  ?
  O101  C105'  C105  .  .  .  74.9(9)  ?
  O101  C105'  C103'  .  .  .  84.3(8)  ?
  O101  C105'  C104'  .  .  .  104.4(7)  ?
  O101  C105'  H104a  .  .  .  129.0(8)  ?
  O101  C105'  H105a  .  .  .  101.2(6)  ?
  O101  C105'  H105'a  .  .  .  47.0(6)  ?
  O101  C105'  H105'b  .  .  .  130.7(8)  ?
  C104  C105'  C105  .  .  .  68.3(9)  ?
  C104  C105'  C103'  .  .  .  46.8(7)  ?
  C104  C105'  C104'  .  .  .  27.7(4)  ?
  C104  C105'  H104a  .  .  .  42.4(4)  ?
  C104  C105'  H105a  .  .  .  90.7(7)  ?
  C104  C105'  H105'a  .  .  .  151.4(12)  ?
  C104  C105'  H105'b  .  .  .  93.6(10)  ?
  C105  C105'  C103'  .  .  .  100.8(11)  ?
  C105  C105'  C104'  .  .  .  93.6(10)  ?
  C105  C105'  H104a  .  .  .  109.3(12)  ?
  C105  C105'  H105a  .  .  .  41.8(6)  ?
  C105  C105'  H105'a  .  .  .  107.2(12)  ?
  C105  C105'  H105'b  .  .  .  71.9(9)  ?
  C103'  C105'  C104'  .  .  .  23.8(7)  ?
  C103'  C105'  H104a  .  .  .  44.7(7)  ?
  C103'  C105'  H105a  .  .  .  135.8(10)  ?
  C103'  C105'  H105'a  .  .  .  110.6(11)  ?
  C103'  C105'  H105'b  .  .  .  136.8(12)  ?
  C104'  C105'  H104a  .  .  .  27.1(3)  ?
  C104'  C105'  H105a  .  .  .  117.8(9)  ?
  C104'  C105'  H105'a  .  .  .  134.1(10)  ?
  C104'  C105'  H105'b  .  .  .  113.0(10)  ?
  H104a  C105'  H105a  .  .  .  115.0(9)  ?
  H104a  C105'  H105'a  .  .  .  139.2(9)  ?
  H104a  C105'  H105'b  .  .  .  96.3(9)  ?
  H105a  C105'  H105'a  .  .  .  104.3(8)  ?
  H105a  C105'  H105'b  .  .  .  32.7(3)  ?
  H105'a  C105'  H105'b  .  .  .  112.2(11)  ?
  Li1  O201  C202  .  .  .  125.06(15)  ?
  Li1  O201  C205  .  .  .  125.74(14)  ?
  C202  O201  C205  .  .  .  109.06(13)  ?
  O201  C202  C203  .  .  .  106.77(19)  ?
  O201  C202  H202a  .  .  .  105.7(17)  ?
  O201  C202  H202b  .  .  .  106.2(15)  ?
  C203  C202  H202a  .  .  .  117.9(14)  ?
  C203  C202  H202b  .  .  .  102.4(14)  ?
  H202a  C202  H202b  .  .  .  117(3)  ?
  C202  C203  C204  .  .  .  102.62(16)  ?
  C202  C203  H203a  .  .  .  109.8(17)  ?
  C202  C203  H203b  .  .  .  110.4(16)  ?
  C204  C203  H203a  .  .  .  111(2)  ?
  C204  C203  H203b  .  .  .  115.0(17)  ?
  H203a  C203  H203b  .  .  .  108(3)  ?
  C203  C204  C205  .  .  .  101.63(17)  ?
  C203  C204  H204a  .  .  .  115.6(13)  ?
  C203  C204  H204b  .  .  .  111.0(18)  ?
  C205  C204  H204a  .  .  .  110.8(16)  ?
  C205  C204  H204b  .  .  .  111.4(14)  ?
  H204a  C204  H204b  .  .  .  106(2)  ?
  O201  C205  C204  .  .  .  105.37(17)  ?
  O201  C205  H205a  .  .  .  106.3(14)  ?
  O201  C205  H205b  .  .  .  110.0(14)  ?
  C204  C205  H205a  .  .  .  114.0(15)  ?
  C204  C205  H205b  .  .  .  111.3(11)  ?
  H205a  C205  H205b  .  .  .  110(2)  ?
  O401  C405  C404  .  .  .  104.95(18)  ?
  O401  C405  H405a  .  .  .  105.7(14)  ?
  O401  C405  H405b  .  .  .  107.6(15)  ?
  C404  C405  H405a  .  .  .  112.5(15)  ?
  C404  C405  H405b  .  .  .  114.6(12)  ?
  H405a  C405  H405b  .  .  .  111(2)  ?
  C302  O301  C305  .  .  .  105.74(18)  ?
  O301  C302  C303  .  .  .  104.91(16)  ?
  O301  C302  H302a  .  .  .  111.0(17)  ?
  O301  C302  H302b  .  .  .  107.2(18)  ?
  C303  C302  H302a  .  .  .  109.5(16)  ?
  C303  C302  H302b  .  .  .  113.3(17)  ?
  H302a  C302  H302b  .  .  .  110.8(19)  ?
  C302  C303  C304  .  .  .  104.3(2)  ?
  C302  C303  H303a  .  .  .  110.4(14)  ?
  C302  C303  H303b  .  .  .  108.4(17)  ?
  C304  C303  H303a  .  .  .  111.3(13)  ?
  C304  C303  H303b  .  .  .  110.3(15)  ?
  H303a  C303  H303b  .  .  .  112(3)  ?
  C303  C304  C305  .  .  .  103.84(16)  ?
  C303  C304  H304a  .  .  .  111.9(16)  ?
  C303  C304  H304b  .  .  .  110.7(15)  ?
  C305  C304  H304a  .  .  .  112.9(17)  ?
  C305  C304  H304b  .  .  .  111.3(19)  ?
  H304a  C304  H304b  .  .  .  106(2)  ?
  O301  C305  C304  .  .  .  105.6(2)  ?
  O301  C305  H305a  .  .  .  107.1(15)  ?
  O301  C305  H305b  .  .  .  110.0(13)  ?
  C304  C305  H305a  .  .  .  111.4(17)  ?
  C304  C305  H305b  .  .  .  110(2)  ?
  H305a  C305  H305b  .  .  .  112(2)  ?
  C405  O401  C402  .  .  .  108.16(16)  ?
  O401  C402  C403  .  .  .  107.0(2)  ?
  O401  C402  H402a  .  .  .  113.0(18)  ?
  O401  C402  H402b  .  .  .  102.9(17)  ?
  C403  C402  H402a  .  .  .  110.0(17)  ?
  C403  C402  H402b  .  .  .  113.6(17)  ?
  H402a  C402  H402b  .  .  .  110(2)  ?
  C402  C403  C404  .  .  .  102.97(18)  ?
  C402  C403  H403a  .  .  .  109(2)  ?
  C402  C403  H403b  .  .  .  105.1(16)  ?
  C404  C403  H403a  .  .  .  115.8(16)  ?
  C404  C403  H403b  .  .  .  113(2)  ?
  H403a  C403  H403b  .  .  .  109(3)  ?
  C405  C404  C403  .  .  .  101.70(15)  ?
  C405  C404  H404a  .  .  .  114.0(16)  ?
  C405  C404  H404b  .  .  .  110.0(13)  ?
  C403  C404  H404a  .  .  .  114.5(14)  ?
  C403  C404  H404b  .  .  .  109.4(15)  ?
  H404a  C404  H404b  .  .  .  107.1(19)  ?
  O11  H11  O21  .  .  .  169(3)  ?
  C142  H142b  H144'c  .  .  .  80.2(2)  ?
  C142  H142c  H142'b  .  .  .  118.8(2)  ?
  C143  H143a  C142'  .  .  .  51.8(3)  ?
  C143  H143a  H142'a  .  .  .  98.7(2)  ?
  C142'  H143a  H142'a  .  .  .  46.9(2)  ?
  C143  H143b  C142'  .  .  .  70.3(4)  ?
  C143  H143b  H142'c  .  .  .  142.3(3)  ?
  C142'  H143b  H142'c  .  .  .  72.0(3)  ?
  C143  H143c  C143'  .  .  .  92.1(4)  ?
  C143  H143c  H143'b  .  .  .  161.3(3)  ?
  C143'  H143c  H143'b  .  .  .  70.8(3)  ?
  C144  H144a  C144'  .  .  .  47.5(4)  ?
  C144  H144a  H144'a  .  .  .  88.3(2)  ?
  C144'  H144a  H144'a  .  .  .  41.0(3)  ?
  C144  H144c  C144'  .  .  .  51.7(3)  ?
  C144  H144c  H144'b  .  .  .  91.2(2)  ?
  C144'  H144c  H144'b  .  .  .  39.8(2)  ?
  C143  H142'a  C142'  .  .  .  50.2(3)  ?
  C143  H142'a  H143a  .  .  .  45.02(17)  ?
  C142'  H142'a  H143a  .  .  .  95.2(2)  ?
  C142'  H142'b  H142c  .  .  .  125.9(3)  ?
  C143  H142'c  C142'  .  .  .  48.4(3)  ?
  C143  H142'c  H143b  .  .  .  23.70(17)  ?
  C142'  H142'c  H143b  .  .  .  72.0(2)  ?
  C143'  H143'b  H143c  .  .  .  66.6(3)  ?
  C144  H144'a  C144'  .  .  .  47.3(4)  ?
  C144  H144'a  H144a  .  .  .  46.15(19)  ?
  C144'  H144'a  H144a  .  .  .  93.3(4)  ?
  C144  H144'b  C144'  .  .  .  60.2(4)  ?
  C144  H144'b  H144c  .  .  .  58.2(2)  ?
  C144'  H144'b  H144c  .  .  .  118.0(3)  ?
  C142  H144'c  C144'  .  .  .  82.4(3)  ?
  C142  H144'c  H142b  .  .  .  61.01(19)  ?
  C144'  H144'c  H142b  .  .  .  141.3(3)  ?
  O31  H31  O41  .  .  .  161(3)  ?
  C102  H102a  C102'  .  .  .  16.7(8)  ?
  C102  H102b  C102'  .  .  .  43.9(10)  ?
  C102  H102b  H102'b  .  .  .  114.0(4)  ?
  C102'  H102b  H102'b  .  .  .  77.3(11)  ?
  C103  H103a  C103'  .  .  .  58.5(9)  ?
  C103  H103a  H103'b  .  .  .  101.2(4)  ?
  C103'  H103a  H103'b  .  .  .  42.8(7)  ?
  C104  H104a  C103'  .  .  .  70.3(8)  ?
  C104  H104a  C104'  .  .  .  47.0(6)  ?
  C104  H104a  C105'  .  .  .  70.1(7)  ?
  C104  H104a  H104'a  .  .  .  120.1(4)  ?
  C103'  H104a  C104'  .  .  .  28.9(10)  ?
  C103'  H104a  C105'  .  .  .  86.5(9)  ?
  C103'  H104a  H104'a  .  .  .  70.5(7)  ?
  C104'  H104a  C105'  .  .  .  92.6(7)  ?
  C104'  H104a  H104'a  .  .  .  78.6(5)  ?
  C105'  H104a  H104'a  .  .  .  147.1(4)  ?
  C104  H104b  C104'  .  .  .  32.2(5)  ?
  C104  H104b  H104'b  .  .  .  62.2(5)  ?
  C104'  H104b  H104'b  .  .  .  40.4(3)  ?
  C105  H105a  C105'  .  .  .  43.1(6)  ?
  C105  H105a  H105'b  .  .  .  87.6(4)  ?
  C105'  H105a  H105'b  .  .  .  48.1(5)  ?
  C105  H105b  O101'  .  .  .  81.7(11)  ?
  O101  H102'a  C102  .  .  .  71.1(4)  ?
  O101  H102'a  C102'  .  .  .  89.4(8)  ?
  C102  H102'a  C102'  .  .  .  28.3(7)  ?
  C102'  H102'b  H102b  .  .  .  48.1(9)  ?
  C103  H103'b  C103'  .  .  .  61.9(10)  ?
  C103  H103'b  C104'  .  .  .  63.7(5)  ?
  C103  H103'b  H103a  .  .  .  66.0(4)  ?
  C103'  H103'b  C104'  .  .  .  25.5(13)  ?
  C103'  H103'b  H103a  .  .  .  127.9(9)  ?
  C104'  H103'b  H103a  .  .  .  122.3(3)  ?
  C103'  H104'a  C104'  .  .  .  35.8(8)  ?
  C103'  H104'a  H104a  .  .  .  74.0(6)  ?
  C104'  H104'a  H104a  .  .  .  48.1(4)  ?
  C103  H104'b  C104  .  .  .  85.3(7)  ?
  C103  H104'b  C103'  .  .  .  42.5(8)  ?
  C103  H104'b  C104'  .  .  .  70.3(6)  ?
  C103  H104'b  H104b  .  .  .  139.5(2)  ?
  C104  H104'b  C103'  .  .  .  71.2(9)  ?
  C104  H104'b  C104'  .  .  .  49.1(6)  ?
  C104  H104'b  H104b  .  .  .  62.7(6)  ?
  C103'  H104'b  C104'  .  .  .  31.7(9)  ?
  C103'  H104'b  H104b  .  .  .  131.5(7)  ?
  C104'  H104'b  H104b  .  .  .  101.5(5)  ?
  O101  H105'a  C105  .  .  .  70.8(5)  ?
  O101  H105'a  C105'  .  .  .  95.7(8)  ?
  C105  H105'a  C105'  .  .  .  38.3(7)  ?
  C105  H105'b  C105'  .  .  .  50.3(6)  ?
  C105  H105'b  H105a  .  .  .  52.2(3)  ?
  C105'  H105'b  H105a  .  .  .  99.2(5)  ?
 
loop_
_geom_torsion_atom_site_label_1
_geom_torsion_atom_site_label_2
_geom_torsion_atom_site_label_3
_geom_torsion_atom_site_label_4
_geom_torsion_site_symmetry_1
_geom_torsion_site_symmetry_2
_geom_torsion_site_symmetry_3
_geom_torsion_site_symmetry_4
_geom_torsion
_geom_torsion_publ_flag              #<< enter YES for value to be published
     ?  ?  ?  ?  ?  ?  ?  ?  ?  ?
 
loop_
_geom_hbond_atom_site_label_D
_geom_hbond_atom_site_label_H
_geom_hbond_atom_site_label_A
_geom_hbond_site_symmetry_D
_geom_hbond_site_symmetry_H
_geom_hbond_site_symmetry_A
_geom_hbond_distance_DH
_geom_hbond_distance_HA
_geom_hbond_distance_DA
_geom_hbond_angle_DHA
_geom_hbond_publ_flag               #<< enter YES for value to be published
      ?  ?  ?  ?  ?  ?  ?  ?  ?  ?  ?
 
 
#--------------------------------------------------------------------------
#      Special items requested by author for inclusion in paper
#--------------------------------------------------------------------------
 
loop_
_publ_manuscript_incl_extra_item
_publ_manuscript_incl_extra_defn
                       ?  ?
 
#--------------------------------------------------------------------------
#       Items which are non-mandatory for Acta C submissions
#--------------------------------------------------------------------------
 
loop_
_geom_contact_atom_site_label_1
_geom_contact_atom_site_label_2
_geom_contact_distance
_geom_contact_site_symmetry_1
_geom_contact_site_symmetry_2
_geom_contact_publ_flag
  Li1  Li2  3.342(4)  .  .  ?
  Li1  C11  2.965(4)  .  .  ?
  Li1  C16  3.249(4)  .  .  ?
  Li1  S1  2.660(4)  .  .  ?
  Li1  O21  3.494(3)  .  .  ?
  Li1  O31  3.423(3)  .  .  ?
  Li1  C41  2.950(3)  .  .  ?
  Li1  C42  3.263(4)  .  .  ?
  Li1  C202  3.053(3)  .  .  ?
  Li1  C205  3.055(3)  .  .  ?
  Li1  H11  2.55(3)  .  .  ?
  Li1  H31  2.77(3)  .  .  ?
  Li1  H202a  3.13(2)  .  .  ?
  Li1  H202b  3.33(3)  .  .  ?
  Li1  H205a  3.05(2)  .  .  ?
  Li1  H402a  3.27(4)  .  .  ?
  Li1  H01a  2.38(3)  .  .  ?
  Li1  H01b  2.60(3)  .  .  ?
  Li1  H02a  3.23(3)  .  '2 576'  ?
  Li2  O11  3.465(4)  .  .  ?
  Li2  C21  2.970(3)  .  .  ?
  Li2  C22  3.243(3)  .  .  ?
  Li2  C31  2.974(3)  .  .  ?
  Li2  C36  3.264(3)  .  .  ?
  Li2  S3  2.645(2)  .  .  ?
  Li2  O41  3.490(3)  .  .  ?
  Li2  H11  2.73(4)  .  .  ?
  Li2  H31  2.59(4)  .  .  ?
  Li2  H405b  3.25(3)  .  .  ?
  Li2  H404a  3.30(3)  .  '2 676'  ?
  Li2  H01a  2.49(2)  .  .  ?
  Li2  H01b  3.18(2)  .  '2 576'  ?
  Li2  H01b  2.474(19)  .  .  ?
  Li2  H02a  2.45(3)  .  .  ?
  Li2  H02b  2.49(3)  .  .  ?
  O11  C12  2.408(2)  .  .  ?
  O11  C16  2.396(2)  .  .  ?
  O11  S1  3.0261(14)  .  .  ?
  O11  O21  2.4515(18)  .  .  ?
  O11  S2  3.0547(12)  .  .  ?
  O11  O02  2.8811(17)  .  '2 576'  ?
  O11  H02a  2.12(3)  .  '2 576'  ?
  C11  C13  2.433(3)  .  .  ?
  C11  C14  2.859(3)  .  .  ?
  C11  C15  2.438(3)  .  .  ?
  C11  S1  2.7755(16)  .  .  ?
  C11  S2  2.7795(16)  .  .  ?
  C11  H11  2.05(4)  .  .  ?
  C12  C14  2.443(3)  .  .  ?
  C12  C15  2.767(3)  .  .  ?
  C12  C16  2.406(2)  .  .  ?
  C12  C26  2.783(2)  .  .  ?
  C12  H11  2.64(4)  .  .  ?
  C12  H13  2.03(3)  .  .  ?
  C13  C141  2.562(4)  .  .  ?
  C13  C144  2.911(6)  .  .  ?
  C13  C15  2.370(3)  .  .  ?
  C13  C16  2.762(2)  .  .  ?
  C13  S2  2.740(2)  .  .  ?
  C14  C142  2.595(6)  .  .  ?
  C14  C143  2.433(6)  .  .  ?
  C14  C144  2.599(6)  .  .  ?
  C14  C142'  2.559(6)  .  .  ?
  C14  C143'  2.570(5)  .  .  ?
  C14  C144'  2.383(7)  .  .  ?
  C14  C16  2.440(3)  .  .  ?
  C14  H13  2.04(2)  .  .  ?
  C14  H143b  2.649(2)  .  .  ?
  C14  H143c  2.6531(19)  .  .  ?
  C14  H144'b  2.667(2)  .  .  ?
  C14  H144'c  2.678(2)  .  .  ?
  C14  H15  2.04(2)  .  .  ?
  C141  C15  2.552(4)  .  .  ?
  C141  H142a  2.255(3)  .  .  ?
  C141  H142b  2.337(2)  .  .  ?
  C141  H142c  2.138(2)  .  .  ?
  C141  H143a  2.008(3)  .  .  ?
  C141  H143b  1.949(3)  .  .  ?
  C141  H143c  1.929(2)  .  .  ?
  C141  H144a  2.123(3)  .  .  ?
  C141  H144b  2.109(3)  .  .  ?
  C141  H144c  2.182(3)  .  .  ?
  C141  H142'a  2.153(3)  .  .  ?
  C141  H142'b  2.080(3)  .  .  ?
  C141  H142'c  2.234(3)  .  .  ?
  C141  H143'a  2.205(2)  .  .  ?
  C141  H143'b  2.380(2)  .  .  ?
  C141  H143'c  2.205(2)  .  .  ?
  C141  H144'a  1.912(3)  .  .  ?
  C141  H144'b  2.023(3)  .  .  ?
  C141  H144'c  2.041(3)  .  .  ?
  C142  C143  2.496(5)  .  .  ?
  C142  C144  2.490(6)  .  .  ?
  C142  H143a  2.669(4)  .  .  ?
  C142  H144a  2.608(4)  .  .  ?
  C142  H142'a  2.274(4)  .  .  ?
  C142  H142'b  1.575(5)  .  .  ?
  C142  H144'a  1.741(4)  .  .  ?
  C142  H144'b  2.256(4)  .  .  ?
  C143  C144  2.494(7)  .  .  ?
  C143  C144'  2.400(6)  .  .  ?
  C143  H142c  2.567(4)  .  .  ?
  C143  H144a  2.648(5)  .  .  ?
  C143  H142'b  2.051(4)  .  .  ?
  C143  H143'a  1.673(4)  .  .  ?
  C143  H143'b  1.733(5)  .  .  ?
  C143  H143'c  2.377(5)  .  .  ?
  C143  H144'a  2.614(5)  .  .  ?
  C144  C142'  2.983(7)  .  .  ?
  C144  H13  2.52(3)  .  .  ?
  C144  H142a  2.635(4)  .  .  ?
  C144  H143'a  2.176(4)  .  .  ?
  C144  H143'c  1.814(4)  .  .  ?
  C144  H144'c  2.151(4)  .  .  ?
  C142'  C143'  2.480(6)  .  .  ?
  C142'  C144'  2.498(7)  .  .  ?
  C142'  C15  2.859(6)  .  .  ?
  C142'  H142a  2.243(5)  .  .  ?
  C142'  H142c  1.662(4)  .  .  ?
  C142'  H143c  2.059(4)  .  .  ?
  C142'  H143'a  2.645(4)  .  .  ?
  C142'  H144'a  2.679(5)  .  .  ?
  C142'  H15  2.50(2)  .  .  ?
  C143'  C143'  2.771(6)  .  '2 575'  ?
  C143'  C144'  2.490(6)  .  .  ?
  C143'  H143a  1.994(5)  .  .  ?
  C143'  H143b  2.263(5)  .  .  ?
  C143'  H144a  2.324(6)  .  .  ?
  C143'  H144b  1.647(5)  .  .  ?
  C143'  H142'a  2.676(5)  .  .  ?
  C143'  H143'a  2.579(4)  .  '2 575'  ?
  C143'  H143'c  2.308(4)  .  '2 575'  ?
  C144'  H142a  1.751(7)  .  .  ?
  C144'  H142b  1.793(5)  .  .  ?
  C144'  H142c  2.392(6)  .  .  ?
  C144'  H143a  2.671(5)  .  .  ?
  C144'  H144b  1.991(6)  .  .  ?
  C144'  H143'a  2.686(4)  .  .  ?
  C144'  H143'c  2.629(5)  .  .  ?
  C15  S1  2.738(2)  .  .  ?
  C16  C42  2.790(2)  .  .  ?
  C16  H15  1.99(3)  .  .  ?
  S1  O41  2.9948(15)  .  .  ?
  S1  C41  2.7605(17)  .  .  ?
  S1  C43  2.7456(18)  .  .  ?
  S1  H15  2.76(2)  .  .  ?
  S1  H43  2.78(2)  .  .  ?
  O21  C22  2.4009(16)  .  .  ?
  O21  C26  2.411(2)  .  .  ?
  O21  S2  3.0493(14)  .  .  ?
  O21  S3  3.0407(12)  .  .  ?
  O21  O01  2.9964(16)  .  '2 576'  ?
  O21  H01b  2.17(2)  .  '2 576'  ?
  C21  C23  2.4409(19)  .  .  ?
  C21  C24  2.868(2)  .  .  ?
  C21  C25  2.444(2)  .  .  ?
  C21  S2  2.7771(18)  .  .  ?
  C21  S3  2.7818(18)  .  .  ?
  C21  H11  2.26(3)  .  .  ?
  C22  C24  2.443(2)  .  .  ?
  C22  C25  2.768(3)  .  .  ?
  C22  C26  2.404(3)  .  .  ?
  C22  C36  2.746(2)  .  .  ?
  C22  H23  2.010(17)  .  .  ?
  C23  C241  2.549(3)  .  .  ?
  C23  C244  2.921(2)  .  .  ?
  C23  C25  2.377(3)  .  .  ?
  C23  C26  2.767(2)  .  .  ?
  C23  S3  2.7360(19)  .  .  ?
  C24  C242  2.487(3)  .  .  ?
  C24  C243  2.526(3)  .  .  ?
  C24  C244  2.531(2)  .  .  ?
  C24  C26  2.447(2)  .  .  ?
  C24  H23  2.05(2)  .  .  ?
  C24  H242c  2.65(3)  .  .  ?
  C24  H243c  2.70(3)  .  .  ?
  C24  H244b  2.69(3)  .  .  ?
  C24  H25  2.07(2)  .  .  ?
  C241  C25  2.571(2)  .  .  ?
  C241  H242a  2.10(3)  .  .  ?
  C241  H242b  2.19(5)  .  .  ?
  C241  H242c  2.03(3)  .  .  ?
  C241  H243a  2.09(3)  .  .  ?
  C241  H243b  2.12(4)  .  .  ?
  C241  H243c  2.04(3)  .  .  ?
  C241  H244a  2.10(2)  .  .  ?
  C241  H244b  2.10(3)  .  .  ?
  C241  H244c  2.12(3)  .  .  ?
  C242  C243  2.502(5)  .  .  ?
  C242  C244  2.474(4)  .  .  ?
  C242  H244c  2.65(3)  .  .  ?
  C243  C244  2.470(4)  .  .  ?
  C243  C25  2.919(3)  .  .  ?
  C243  H242a  2.69(4)  .  .  ?
  C243  H242c  2.68(4)  .  .  ?
  C243  H244a  2.58(3)  .  .  ?
  C243  H25  2.624(18)  .  .  ?
  C244  H23  2.62(2)  .  .  ?
  C244  H242a  2.69(3)  .  .  ?
  C244  H243a  2.61(3)  .  .  ?
  C244  H243c  2.59(3)  .  .  ?
  C25  S2  2.7419(14)  .  .  ?
  C26  H25  2.02(2)  .  .  ?
  S2  H11  2.69(4)  .  .  ?
  S2  H25  2.777(17)  .  .  ?
  O31  C32  2.4129(18)  .  .  ?
  O31  C36  2.3843(16)  .  .  ?
  O31  S3  2.9940(12)  .  .  ?
  O31  O41  2.4302(18)  .  .  ?
  O31  S4  3.0762(12)  .  .  ?
  C31  C33  2.442(2)  .  .  ?
  C31  C34  2.867(2)  .  .  ?
  C31  C35  2.4396(19)  .  .  ?
  C31  S3  2.7685(17)  .  .  ?
  C31  S4  2.7823(17)  .  .  ?
  C31  H31  1.95(3)  .  .  ?
  C32  C34  2.447(2)  .  .  ?
  C32  C35  2.769(2)  .  .  ?
  C32  C36  2.407(2)  .  .  ?
  C32  C46  2.824(2)  .  .  ?
  C32  H31  2.52(3)  .  .  ?
  C32  H33  1.971(19)  .  .  ?
  C33  C341  2.590(2)  .  .  ?
  C33  C344  2.896(2)  .  .  ?
  C33  C35  2.376(2)  .  .  ?
  C33  C36  2.765(2)  .  .  ?
  C33  S4  2.7405(15)  .  .  ?
  C34  C342  2.498(3)  .  .  ?
  C34  C343  2.511(3)  .  .  ?
  C34  C344  2.535(3)  .  .  ?
  C34  C36  2.440(2)  .  .  ?
  C34  H33  2.02(2)  .  .  ?
  C34  H342c  2.70(3)  .  .  ?
  C34  H35  2.05(2)  .  .  ?
  C341  C35  2.533(2)  .  .  ?
  C341  H342a  2.10(3)  .  .  ?
  C341  H342b  2.12(3)  .  .  ?
  C341  H342c  2.10(3)  .  .  ?
  C341  H343a  2.09(3)  .  .  ?
  C341  H343b  2.12(3)  .  .  ?
  C341  H343c  2.07(3)  .  .  ?
  C341  H344a  2.05(3)  .  .  ?
  C341  H344b  2.07(3)  .  .  ?
  C341  H344c  2.13(3)  .  .  ?
  C341  H35  2.67(2)  .  .  ?
  C342  C343  2.513(4)  .  .  ?
  C342  C344  2.475(4)  .  .  ?
  C342  H344a  2.67(3)  .  .  ?
  C343  C344  2.500(4)  .  .  ?
  C343  H342c  2.69(3)  .  .  ?
  C343  H344a  2.61(3)  .  .  ?
  C343  H344b  2.65(2)  .  .  ?
  C344  H33  2.575(17)  .  .  ?
  C344  H342a  2.67(3)  .  .  ?
  C344  H343a  2.69(3)  .  .  ?
  C344  H343c  2.68(3)  .  .  ?
  C35  S3  2.7404(17)  .  .  ?
  C36  H35  2.034(17)  .  .  ?
  S3  H23  2.77(2)  .  .  ?
  O41  C42  2.384(3)  .  .  ?
  O41  C46  2.408(2)  .  .  ?
  O41  S4  3.0691(12)  .  .  ?
  C41  C43  2.454(3)  .  .  ?
  C41  C44  2.874(3)  .  .  ?
  C41  C45  2.443(2)  .  .  ?
  C41  S4  2.7856(18)  .  .  ?
  C41  H31  2.31(4)  .  .  ?
  C42  C44  2.438(2)  .  .  ?
  C42  C45  2.758(2)  .  .  ?
  C42  C46  2.404(2)  .  .  ?
  C42  H43  2.02(2)  .  .  ?
  C43  C441  2.578(3)  .  .  ?
  C43  C444  2.884(4)  .  .  ?
  C43  C45  2.377(3)  .  .  ?
  C43  C46  2.776(3)  .  .  ?
  C44  C442  2.506(4)  .  .  ?
  C44  C443  2.499(3)  .  .  ?
  C44  C444  2.544(4)  .  .  ?
  C44  C46  2.449(3)  .  .  ?
  C44  H43  2.06(2)  .  .  ?
  C44  H45  2.01(3)  .  .  ?
  C441  C45  2.549(4)  .  .  ?
  C441  H442a  2.02(3)  .  .  ?
  C441  H442b  2.11(3)  .  .  ?
  C441  H442c  2.14(3)  .  .  ?
  C441  H443a  2.05(3)  .  .  ?
  C441  H443b  2.14(2)  .  .  ?
  C441  H443c  2.10(2)  .  .  ?
  C441  H444a  2.09(4)  .  .  ?
  C441  H444b  2.07(3)  .  .  ?
  C441  H444c  2.19(3)  .  .  ?
  C441  H45  2.67(3)  .  .  ?
  C442  C443  2.507(4)  .  .  ?
  C442  C444  2.482(5)  .  .  ?
  C442  H443a  2.70(3)  .  .  ?
  C442  H444a  2.68(4)  .  .  ?
  C443  C444  2.489(4)  .  .  ?
  C443  H442a  2.62(3)  .  .  ?
  C443  H444a  2.67(3)  .  .  ?
  C443  H444b  2.64(2)  .  .  ?
  C444  H43  2.54(2)  .  .  ?
  C444  H442a  2.64(3)  .  .  ?
  C444  H442b  2.68(3)  .  .  ?
  C444  H443a  2.66(3)  .  .  ?
  C45  S4  2.733(2)  .  .  ?
  C46  H45  2.00(2)  .  .  ?
  S4  H31  2.64(3)  .  .  ?
  S4  H33  2.749(17)  .  .  ?
  S4  H45  2.78(3)  .  .  ?
  O01  O02  2.965(2)  .  .  ?
  O01  O201  2.9684(18)  .  .  ?
  O01  O401  2.706(2)  .  .  ?
  O02  O301  2.772(2)  .  '2 676'  ?
  O101  C103  2.286(10)  .  .  ?
  O101  C104  2.267(12)  .  .  ?
  O101  C103'  2.215(19)  .  .  ?
  O101  C104'  2.383(10)  .  .  ?
  O101  H143'b  2.663(6)  .  .  ?
  O101  H102a  1.948(5)  .  .  ?
  O101  H102b  1.927(5)  .  .  ?
  O101  H104a  2.527(6)  .  .  ?
  O101  H105a  2.119(6)  .  .  ?
  O101  H105b  2.119(6)  .  .  ?
  O101  H102'b  2.154(5)  .  .  ?
  O101  H103'a  2.199(5)  .  .  ?
  O101  H105'b  2.197(6)  .  .  ?
  C102  C104  2.365(13)  .  .  ?
  C102  C105  2.383(11)  .  .  ?
  C102  O101'  2.101(19)  .  .  ?
  C102  C104'  2.144(12)  .  .  ?
  C102  C105'  2.219(13)  .  .  ?
  C102  H103a  1.863(8)  .  .  ?
  C102  H103b  1.998(9)  .  .  ?
  C102  H104a  2.604(8)  .  .  ?
  C102  H102'b  1.563(7)  .  .  ?
  C102  H103'a  1.612(7)  .  .  ?
  C102  H103'b  1.860(8)  .  .  ?
  C102  H104'b  2.590(9)  .  .  ?
  C102  H105'a  2.149(7)  .  .  ?
  C103  C105  2.338(10)  .  .  ?
  C103  C105'  2.345(13)  .  .  ?
  C103  H102a  1.957(9)  .  .  ?
  C103  H102b  1.959(8)  .  .  ?
  C103  H104a  2.087(7)  .  .  ?
  C103  H104b  2.112(8)  .  .  ?
  C103  H105b  2.613(6)  .  .  ?
  C103  H102'a  2.447(8)  .  .  ?
  C103  H102'b  1.926(7)  .  .  ?
  C103  H103'a  1.827(7)  .  .  ?
  C103  H104'a  2.161(7)  .  .  ?
  C104  C102'  2.428(18)  .  .  ?
  C104  H103a  2.139(7)  .  .  ?
  C104  H103b  2.081(8)  .  .  ?
  C104  H105a  1.979(8)  .  .  ?
  C104  H105b  1.961(7)  .  .  ?
  C104  H103'a  2.149(8)  .  .  ?
  C104  H103'b  2.064(7)  .  .  ?
  C104  H104'a  1.584(7)  .  .  ?
  C104  H105'a  2.214(10)  .  .  ?
  C104  H105'b  1.808(8)  .  .  ?
  C105  C102'  2.203(17)  .  .  ?
  C105  C103'  2.233(16)  .  .  ?
  C105  H104a  1.922(7)  .  .  ?
  C105  H104b  2.086(9)  .  .  ?
  C105  H102'a  2.058(9)  .  .  ?
  C105  H103'a  2.644(7)  .  .  ?
  C105  H104'a  2.666(7)  .  .  ?
  C105  H104'b  2.255(8)  .  .  ?
  O101'  C103'  2.33(2)  .  .  ?
  O101'  C104'  2.233(17)  .  .  ?
  O101'  C105'  2.08(2)  .  .  ?
  O101'  H102b  2.17(2)  .  .  ?
  O101'  H102b  2.677(16)  .  '2 675'  ?
  O101'  H103b  1.733(17)  .  .  ?
  O101'  H104a  2.650(16)  .  .  ?
  O101'  H104b  2.24(2)  .  .  ?
  O101'  H105a  2.129(18)  .  .  ?
  O101'  H102'a  1.81(2)  .  .  ?
  O101'  H102'b  2.294(17)  .  '2 675'  ?
  O101'  H102'b  1.74(2)  .  .  ?
  O101'  H104'b  2.179(18)  .  .  ?
  O101'  H105'a  2.429(18)  .  .  ?
  O101'  H105'b  2.495(18)  .  .  ?
  C102'  C103'  2.02(2)  .  .  ?
  C102'  C104'  2.431(17)  .  .  ?
  C102'  C105'  2.332(18)  .  .  ?
  C102'  H103a  2.267(14)  .  .  ?
  C102'  H103b  1.824(16)  .  .  ?
  C102'  H105b  2.382(14)  .  .  ?
  C102'  H102'b  2.692(11)  .  '2 675'  ?
  C102'  H103'a  2.279(12)  .  .  ?
  C102'  H103'b  2.312(14)  .  .  ?
  C102'  H105'a  2.278(14)  .  .  ?
  C103'  H102a  1.88(2)  .  .  ?
  C103'  H102b  2.518(19)  .  .  ?
  C103'  H103b  1.914(16)  .  .  ?
  C103'  H104b  2.02(2)  .  .  ?
  C103'  H102'a  2.695(18)  .  .  ?
  C103'  H102'b  2.688(17)  .  .  ?
  C103'  H105'a  2.306(18)  .  .  ?
  C104'  H102a  2.557(9)  .  .  ?
  C104'  H103a  1.620(7)  .  .  ?
  C104'  H103b  2.107(7)  .  .  ?
  C104'  H105a  2.545(7)  .  .  ?
  C104'  H105b  2.617(6)  .  .  ?
  C104'  H103'a  1.547(8)  .  .  ?
  C104'  H105'a  2.291(8)  .  .  ?
  C104'  H105'b  2.223(7)  .  .  ?
  C105'  H102a  2.650(11)  .  .  ?
  C105'  H104b  2.267(13)  .  .  ?
  C105'  H105b  2.085(9)  .  .  ?
  C105'  H102'a  2.242(11)  .  .  ?
  C105'  H103'a  1.987(9)  .  .  ?
  C105'  H104'a  2.119(10)  .  .  ?
  C105'  H104'b  2.285(12)  .  .  ?
  O201  C203  2.364(2)  .  .  ?
  O201  C204  2.345(2)  .  .  ?
  O201  H202a  1.94(3)  .  .  ?
  O201  H202b  2.05(4)  .  .  ?
  O201  H205a  1.97(2)  .  .  ?
  O201  H205b  2.00(3)  .  .  ?
  C202  C204  2.357(3)  .  .  ?
  C202  C205  2.345(3)  .  .  ?
  C202  H203a  2.15(4)  .  .  ?
  C202  H203b  2.07(2)  .  .  ?
  C203  C205  2.350(3)  .  .  ?
  C203  H202a  2.13(3)  .  .  ?
  C203  H202b  2.05(3)  .  .  ?
  C203  H204a  2.19(3)  .  .  ?
  C203  H204b  2.07(3)  .  .  ?
  C204  H203a  2.18(4)  .  .  ?
  C204  H203b  2.14(3)  .  .  ?
  C204  H205a  2.13(2)  .  .  ?
  C204  H205b  2.08(3)  .  .  ?
  C205  H204a  2.13(2)  .  .  ?
  C205  H204b  2.07(3)  .  .  ?
  C405  C402  2.344(4)  .  .  ?
  C405  C403  2.344(3)  .  .  ?
  C405  H403b  2.69(3)  .  .  ?
  C405  H404a  2.10(2)  .  .  ?
  C405  H404b  2.07(2)  .  .  ?
  O301  C303  2.339(3)  .  .  ?
  O301  C304  2.351(3)  .  .  ?
  O301  H302a  2.01(3)  .  .  ?
  O301  H302b  1.96(3)  .  .  ?
  O301  H305a  1.99(2)  .  .  ?
  O301  H305b  2.00(3)  .  .  ?
  O301  H02b  1.97(3)  .  '2 676'  ?
  C302  C304  2.414(3)  .  .  ?
  C302  C305  2.280(3)  .  .  ?
  C302  H303a  2.10(3)  .  .  ?
  C302  H303b  2.03(3)  .  .  ?
  C302  H305b  2.64(3)  .  .  ?
  C303  C305  2.410(4)  .  .  ?
  C303  H302a  2.07(2)  .  .  ?
  C303  H302b  2.10(2)  .  .  ?
  C303  H304a  2.09(2)  .  .  ?
  C303  H304b  2.12(2)  .  .  ?
  C304  H303a  2.13(3)  .  .  ?
  C304  H303b  2.07(3)  .  .  ?
  C304  H305a  2.12(4)  .  .  ?
  C304  H305b  2.08(3)  .  .  ?
  C305  H302a  2.64(2)  .  .  ?
  C305  H304a  2.08(3)  .  .  ?
  C305  H304b  2.12(3)  .  .  ?
  O401  C403  2.382(3)  .  .  ?
  O401  C404  2.343(2)  .  .  ?
  O401  H405a  1.96(3)  .  .  ?
  O401  H405b  1.97(2)  .  .  ?
  O401  H402a  2.09(4)  .  .  ?
  O401  H402b  1.94(3)  .  .  ?
  O401  H404b  2.68(2)  .  .  ?
  O401  H01a  1.85(3)  .  .  ?
  C402  C404  2.369(3)  .  .  ?
  C402  H403a  2.08(3)  .  .  ?
  C402  H403b  1.99(3)  .  .  ?
  C403  H405a  2.69(3)  .  .  ?
  C403  H402a  2.12(4)  .  .  ?
  C403  H402b  2.13(2)  .  .  ?
  C403  H404a  2.11(3)  .  .  ?
  C403  H404b  2.07(2)  .  .  ?
  C404  H405a  2.10(3)  .  .  ?
  C404  H405b  2.10(2)  .  .  ?
  C404  H403a  2.15(4)  .  .  ?
  C404  H403b  2.09(2)  .  .  ?
  H11  H02a  2.35(4)  .  '2 576'  ?
  H13  H144b  2.21(3)  .  .  ?
  H13  H144c  2.34(3)  .  .  ?
  H13  H143'c  2.36(2)  .  .  ?
  H13  H344c  2.27(3)  .  '1 455'  ?
  H142a  H142b  1.56430(15)  .  .  ?
  H142a  H142c  1.55459(10)  .  .  ?
  H142a  H144a  2.3804(3)  .  .  ?
  H142a  H142'a  2.16207(15)  .  .  ?
  H142a  H142'b  2.01230(16)  .  .  ?
  H142a  H144'a  1.44347(18)  .  .  ?
  H142a  H144'c  1.53209(12)  .  .  ?
  H142b  H142c  1.59293(11)  .  .  ?
  H142b  H142'b  2.38302(17)  .  .  ?
  H142b  H144'a  2.1442(2)  .  .  ?
  H142b  H144'b  2.1573(3)  .  .  ?
  H142b  H442c  2.36(3)  .  '1 455'  ?
  H142c  H142'a  2.1582(2)  .  .  ?
  H142c  H142'c  2.27581(15)  .  .  ?
  H142c  H144'c  1.98337(15)  .  .  ?
  H142c  H15  2.36(3)  .  .  ?
  H143a  H143b  1.47843(10)  .  .  ?
  H143a  H143c  1.69968(19)  .  .  ?
  H143a  H142'b  2.2353(2)  .  .  ?
  H143a  H142'c  1.82968(12)  .  .  ?
  H143a  H143'a  1.6706(2)  .  .  ?
  H143a  H143'b  2.3507(3)  .  .  ?
  H143a  H344a  2.36(3)  .  '2 675'  ?
  H143b  H143c  1.5273(2)  .  .  ?
  H143b  H142'a  1.48883(9)  .  .  ?
  H143b  H142'b  1.76585(14)  .  .  ?
  H143b  H143'b  2.1983(3)  .  .  ?
  H143c  H142'a  2.3243(3)  .  .  ?
  H143c  H142'c  2.0933(3)  .  .  ?
  H143c  H143'a  1.43855(9)  .  .  ?
  H143c  H143'c  1.89954(16)  .  .  ?
  H144a  H144b  1.63034(18)  .  .  ?
  H144a  H144c  1.62803(14)  .  .  ?
  H144a  H143'a  2.07359(15)  .  .  ?
  H144a  H143'c  2.3217(2)  .  .  ?
  H144a  H144'b  1.65810(17)  .  .  ?
  H144b  H144c  1.51441(9)  .  .  ?
  H144b  H143'a  1.94957(12)  .  .  ?
  H144b  H143'c  1.01984(8)  .  .  ?
  H144b  H144'a  2.3258(3)  .  .  ?
  H144b  H144'b  1.91425(14)  .  .  ?
  H144c  H144'a  1.7784(2)  .  .  ?
  H144c  H144'c  2.0149(3)  .  .  ?
  H142'a  H142'b  1.59890(16)  .  .  ?
  H142'a  H142'c  1.56965(10)  .  .  ?
  H142'b  H142'c  1.45795(10)  .  .  ?
  H142'b  H15  2.19(3)  .  .  ?
  H142'c  H15  2.33(2)  .  .  ?
  H143'a  H143'b  1.58993(10)  .  .  ?
  H143'a  H143'c  1.9674(2)  .  '2 575'  ?
  H143'a  H143'c  1.52531(14)  .  .  ?
  H143'b  H143'c  1.63544(12)  .  .  ?
  H143'b  H143'c  2.26873(18)  .  '2 575'  ?
  H143'b  H105'a  2.3612(2)  .  .  ?
  H143'c  H143'c  2.2154(2)  .  '2 575'  ?
  H144'a  H144'b  1.48610(13)  .  .  ?
  H144'a  H144'c  1.59464(16)  .  .  ?
  H144'b  H144'c  1.4728(2)  .  .  ?
  H15  H204a  2.31(3)  .  '2 566'  ?
  H23  H244c  2.18(3)  .  .  ?
  H242a  H242b  1.70(6)  .  .  ?
  H242a  H242c  1.53(4)  .  .  ?
  H242b  H242c  1.56(6)  .  .  ?
  H243a  H243b  1.62(4)  .  .  ?
  H243a  H243c  1.58(4)  .  .  ?
  H243a  H244a  2.32(4)  .  .  ?
  H243b  H243c  1.63(5)  .  .  ?
  H243b  H25  2.15(4)  .  .  ?
  H243c  H105a  2.23(3)  .  .  ?
  H243c  H105'b  2.21(3)  .  .  ?
  H244a  H244b  1.60(4)  .  .  ?
  H244a  H244c  1.64(4)  .  .  ?
  H244b  H244c  1.57(5)  .  .  ?
  H33  H344c  2.34(3)  .  .  ?
  H342a  H342b  1.59(4)  .  .  ?
  H342a  H342c  1.60(4)  .  .  ?
  H342b  H342c  1.62(4)  .  .  ?
  H342c  H35  2.31(3)  .  .  ?
  H343a  H343b  1.59(4)  .  .  ?
  H343a  H343c  1.56(4)  .  .  ?
  H343b  H343c  1.62(5)  .  .  ?
  H343b  H35  2.29(3)  .  .  ?
  H344a  H344b  1.53(3)  .  .  ?
  H344a  H344c  1.62(3)  .  .  ?
  H344b  H344c  1.61(4)  .  .  ?
  H43  H444b  2.36(3)  .  .  ?
  H43  H444c  2.34(4)  .  .  ?
  H43  H203a  2.38(4)  .  '2 566'  ?
  H442a  H442b  1.57(4)  .  .  ?
  H442a  H442c  1.56(5)  .  .  ?
  H442b  H442c  1.63(4)  .  .  ?
  H442c  H45  2.39(4)  .  .  ?
  H443a  H443b  1.56(5)  .  .  ?
  H443a  H443c  1.52(4)  .  .  ?
  H443b  H443c  1.55(4)  .  .  ?
  H443b  H45  2.34(4)  .  .  ?
  H444a  H444b  1.60(4)  .  .  ?
  H444a  H444c  1.66(4)  .  .  ?
  H444b  H444c  1.76(3)  .  .  ?
  H102a  H102b  1.55122(10)  .  .  ?
  H102a  H103a  2.08501(15)  .  .  ?
  H102a  H102'a  2.01802(16)  .  .  ?
  H102a  H102'b  2.21223(15)  .  .  ?
  H102a  H103'a  1.48317(11)  .  .  ?
  H102a  H103'b  2.04385(16)  .  .  ?
  H102b  H103b  2.08531(15)  .  .  ?
  H102b  H102'a  1.36293(11)  .  .  ?
  H103a  H103b  1.55128(9)  .  .  ?
  H103a  H104a  2.2799(2)  .  .  ?
  H103a  H103'a  1.73434(13)  .  .  ?
  H103a  H104'a  2.01163(16)  .  .  ?
  H103a  H104'b  1.6583(3)  .  .  ?
  H103b  H104b  2.3253(2)  .  .  ?
  H103b  H102'b  1.72389(16)  .  .  ?
  H103b  H103'b  1.71157(10)  .  .  ?
  H103b  H104'b  1.73989(11)  .  .  ?
  H104a  H104b  1.55123(11)  .  .  ?
  H104a  H105a  2.3252(2)  .  .  ?
  H104a  H103'a  1.7042(2)  .  .  ?
  H104a  H103'b  2.1166(2)  .  .  ?
  H104a  H104'b  1.44885(12)  .  .  ?
  H104a  H105'a  2.1224(2)  .  .  ?
  H104a  H105'b  1.82393(15)  .  .  ?
  H104b  H105b  2.3315(2)  .  .  ?
  H104b  H104'a  1.89437(14)  .  .  ?
  H104b  H105'b  2.34462(15)  .  .  ?
  H105a  H105b  1.55125(12)  .  .  ?
  H105a  H105'a  1.7616(2)  .  .  ?
  H105b  H102'a  2.2707(3)  .  .  ?
  H105b  H105'b  2.11405(16)  .  .  ?
  H102'a  H102'b  1.55133(10)  .  .  ?
  H102'a  H105'a  1.90791(12)  .  .  ?
  H102'b  H102'b  2.06881(14)  .  '2 675'  ?
  H103'a  H103'b  1.55136(11)  .  .  ?
  H103'a  H104'a  1.59803(15)  .  .  ?
  H103'a  H104'b  2.32198(18)  .  .  ?
  H103'a  H105'a  2.10843(18)  .  .  ?
  H103'b  H104'a  1.81756(15)  .  .  ?
  H103'b  H104'b  1.6218(2)  .  .  ?
  H104'a  H104'b  1.55132(12)  .  .  ?
  H105'a  H105'b  1.5512(2)  .  .  ?
  H202a  H202b  1.76(5)  .  .  ?
  H202a  H203a  2.37(4)  .  .  ?
  H202b  H203b  2.19(4)  .  .  ?
  H203a  H203b  1.70(6)  .  .  ?
  H203b  H204b  2.36(4)  .  .  ?
  H204a  H204b  1.62(4)  .  .  ?
  H204a  H205b  2.34(3)  .  .  ?
  H204a  H302a  2.38(4)  .  '2 666'  ?
  H204b  H205a  2.33(4)  .  .  ?
  H205a  H205b  1.63(4)  .  .  ?
  H405a  H405b  1.61(3)  .  .  ?
  H405a  H404a  2.40(3)  .  .  ?
  H405b  H404b  2.34(3)  .  .  ?
  H302a  H302b  1.61(4)  .  .  ?
  H302a  H303a  2.24(4)  .  .  ?
  H302b  H303b  2.23(4)  .  .  ?
  H303a  H303b  1.63(4)  .  .  ?
  H303a  H304a  2.27(3)  .  .  ?
  H303b  H304b  2.23(3)  .  .  ?
  H304a  H304b  1.57(4)  .  .  ?
  H304a  H305b  2.26(4)  .  .  ?
  H304b  H305a  2.28(5)  .  .  ?
  H305a  H305b  1.67(4)  .  .  ?
  H402a  H402b  1.69(4)  .  .  ?
  H402a  H403a  2.24(5)  .  .  ?
  H402b  H403b  2.18(4)  .  .  ?
  H403a  H403b  1.60(5)  .  .  ?
  H403a  H404b  2.36(4)  .  .  ?
  H404a  H404b  1.58(4)  .  .  ?
  H01a  H01b  1.33(3)  .  .  ?
  H02a  H02b  1.28(3)  .  .  ?
 
_atom_sites_solution_primary           ?
_atom_sites_solution_secondary         ?
_atom_sites_solution_hydrogens         ?
 
_geom_special_details                  ?
 
 
_cell_special_details
;      ?
;
 
_exptl_special_details
;      ?
;
 
_diffrn_special_details
;      ?
;
 
_chemical_compound_source              ?
_chemical_name_systematic              ?
_chemical_name_common                  ?
_chemical_formula_analytical           ?
_chemical_formula_structural           ?
 
_exptl_crystal_F_000                   1136
 
loop_
_diffrn_standard_refln_index_h
_diffrn_standard_refln_index_k
_diffrn_standard_refln_index_l
  ?  ?  ?
loop_
_diffrn_attenuator_code
_diffrn_attenuator_scale
  ?  ?
 
_reflns_limit_h_min                    0
_reflns_limit_h_max                    16
_reflns_limit_k_min                    -18
_reflns_limit_k_max                    18
_reflns_limit_l_min                    -25
_reflns_limit_l_max                    25
_reflns_number_observed                ?
_reflns_d_resolution_high              .732
_reflns_d_resolution_low               12.744
 
_diffrn_reflns_av_sigmaI/netI          .027
_diffrn_reflns_theta_min               1.59
_diffrn_reflns_reduction_process       ?
 
_diffrn_ambient_temperature            153
_diffrn_radiation_source               'sealed tube'
_diffrn_radiation_monochromator        graphite
_diffrn_radiation_detector             'CCD area detector'
 
_refine_ls_extinction_expression      'Eq22 p292 "Cryst. Comp." Munksgaard 1970'
_refine_ls_matrix_type                 atomblock
_refine_ls_number_restraints           0
_refine_ls_number_constraints          0
_refine_ls_R_factor_all                .051
_refine_ls_wR_factor_all               .055
_refine_ls_goodness_of_fit_all         1.157
_refine_ls_shift/su_mean               .008
 
#===END

data_global
 
_audit_creation_method                 Xtal3.6
_audit_creation_date                   99-11-10
_audit_update_record                   ?
 
#==============================================================================
#   (Publishing Staff Use Only)
 
_journal_date_recd_electronic          ?
_journal_date_to_coeditor              ?
_journal_date_from_coeditor            ?
_journal_date_accepted                 ?
_journal_date_printers_first           ?
_journal_date_printers_final           ?
_journal_date_proofs_out               ?
_journal_date_proofs_in                ?
_journal_coeditor_name                 ?
_journal_coeditor_code                 ?
_journal_coeditor_notes
; ?
;
_journal_techeditor_code               ?
_journal_techeditor_notes
; ?
;
_journal_coden_ASTM                    ?
_journal_name_full                     ?
_journal_year                          ?
_journal_volume                        ?
_journal_issue                         ?
_journal_page_first                    ?
_journal_page_last                     ?
_journal_suppl_publ_number             ?
_journal_suppl_publ_pages              ?
 
#=======================================================================
 
# 1. SUBMISSION DETAILS
#----------------------
 
_publ_contact_author_name
     'Skelton, B. W.'
_publ_contact_author_address
;
   Department of Chemistry
   University of Western Australia
   Nedlands
   Western Australia 6907
   Australia
;
_publ_contact_author_email            bws@crystal.uwa.edu.au
_publ_contact_author_fax               (+61)_08_9380_1118
_publ_contact_author_phone             (+61)_08-9380_3481
 
_publ_contact_letter
;    ?                                      #<< contact letter
;
 
_publ_requested_journal   'Inorg.Chem.'    
_publ_requested_category   ?              
 
_publ_section_title
;    ?                                      #<< paper title text
;
_publ_section_title_footnote
;    ?                                      #<< paper footnote text
;
 
loop_
_publ_author_name
_publ_author_footnote
_publ_author_address
 
 
'Skelton, Brian W.' .
; Department of Chemistry, 
University of Western Australia,
Nedlands,
WA 6907
Australia.
;
 
_publ_section_synopsis
;    ?                                     #<< synopsis if FI,CI,CM,CO papers
;
_publ_section_abstract
;    ?                                     #<< abstract text
;
_publ_section_comment
;    ?                                     #<< scientific commentary text
;
 
_publ_section_exptl_prep
;    ?                        #<< material & crystal preparation text
;
 
_publ_section_exptl_refinement
;    ?                        #<< crystallographic methods used
;
 
_publ_section_acknowledgements
;    ?                                     #<< acknowledgements text
;
 
_publ_section_references
;
 Sheldrick, G M. (1996). SADABS. Pogram for Empirical Absorption Correction
  of Area Detector Data.  University of Gottingen, Germany.
 Hall, S.R., King, G.S.D., and Stewart., J.M. (1995).
 The Xtal 3.5 User's Manual.  University of Western Australia, Lamb: Perth.
;
_publ_section_figure_captions
;    ?                                     #<< figure captions
;
 
 
#=======================================================================
#  Data block for single structure (one for each study in the paper)
#=======================================================================
 
 
data_ahb53
 
 
# 2. EXPERIMENTAL DATA
#---------------------
 
 
 
_chemical_formula_sum                 'C56 H81 Na1 O9 S4'
_chemical_formula_moiety               ?
_chemical_formula_weight               1049.51
_chemical_melting_point                ?
 
_symmetry_cell_setting                 monoclinic
_symmetry_space_group_name_H-M         P_1_21/c_1
_symmetry_space_group_name_Hall        -p_2ybc
 
loop_
_symmetry_equiv_pos_as_xyz
  +x,+y,+z  -x,1/2+y,1/2-z  -x,-y,-z  +x,1/2-y,1/2+z
 
_cell_length_a                         13.259(2)
_cell_length_b                         22.178(4)
_cell_length_c                         20.527(4)
_cell_angle_alpha                      90.00000
_cell_angle_beta                       105.500(3)
_cell_angle_gamma                      90.00000
_cell_volume                           5816.6(18)
_cell_formula_units_Z                  4
 
_exptl_crystal_density_diffrn          1.198
_exptl_crystal_density_meas            ?
_exptl_crystal_density_method          ?
_diffrn_radiation_type                'Mo K\a'
_diffrn_radiation_wavelength           .71073
 
_cell_measurement_reflns_used          8192
_cell_measurement_theta_min            2.8
_cell_measurement_theta_max            24.3
_cell_measurement_temperature          153
 
_exptl_absorpt_coefficient_mu          .111
_exptl_crystal_description             plate
_exptl_crystal_size_max                .45
_exptl_crystal_size_mid                .40
_exptl_crystal_size_min                .20
_exptl_crystal_size_rad                ?
_exptl_crystal_colour                  colourless
 
_diffrn_measurement_device_type
;
Bruker SMART CCD diffractometer
;
_diffrn_measurement_method             '\w scans'
_diffrn_detector_area_resol_mean       ?
 
_exptl_absorpt_correction_type         none        
_exptl_absorpt_process_details        ?     
_exptl_absorpt_correction_T_min        ?
_exptl_absorpt_correction_T_max        ?
 
_diffrn_reflns_number                  63310
_reflns_number_total                   13373
_reflns_Friedel_coverage               0
_reflns_number_gt                      9851
_reflns_threshold_expression          'F    > 4.00 sig(F   )'
 
_diffrn_reflns_theta_max               29.19
_diffrn_reflns_theta_full              ?
_diffrn_measured_fraction_theta_max    ?
_diffrn_measured_fraction_theta_full   ?
_diffrn_reflns_av_R_equivalents        .066
_diffrn_reflns_limit_h_min             0
_diffrn_reflns_limit_h_max             17
_diffrn_reflns_limit_k_min             -28
_diffrn_reflns_limit_k_max             0
_diffrn_reflns_limit_l_min             -26
_diffrn_reflns_limit_l_max             26
_diffrn_standards_number               ?
_diffrn_standards_interval_count       ?
_diffrn_standards_interval_time        ?  
_diffrn_standards_decay_%              0 
 
 
_refine_ls_structure_factor_coef       F
_refine_ls_R_factor_gt                 .073
_refine_ls_wR_factor_ref               .085
_refine_ls_goodness_of_fit_ref         1.66
_refine_ls_number_reflns               9851
_refine_ls_number_parameters           792
_refine_ls_weighting_scheme            calc
_refine_ls_weighting_details           ?
_refine_ls_hydrogen_treatment          mixed
_refine_ls_shift/su_max                .069
_refine_diff_density_min               -.457
_refine_diff_density_max               1.018
 
_refine_ls_extinction_method           ?
_refine_ls_extinction_coef             ?       
_refine_ls_abs_structure_details       ?
_refine_ls_abs_structure_Flack         ?
 
 
# 3. Information for the "methods" section
#-----------------------------------------
 
_computing_data_collection             'Siemens SMART (Siemens, 1995)'
_computing_cell_refinement             'Siemens SAINT (Siemens, 1995)'
_computing_data_reduction             'xtal ADDREF SORTRF'
_computing_structure_solution          xtal
_computing_structure_refinement       'xtal CRYLSQ'
_computing_molecular_graphics          xtal
_computing_publication_material       'xtal BONDLA CIFIO'
 
 
# 4. Supplementary data for validation and tables
#------------------------------------------------
 
loop_
_atom_type_symbol
_atom_type_description
_atom_type_oxidation_number
_atom_type_number_in_cell
_atom_type_scat_dispersion_real
_atom_type_scat_dispersion_imag
_atom_type_scat_source
  C  ?  0  224  .002  .002  'Int Tables Vol IV Tables 2.2B and 2.3.1'
  H  ?  0  324  0  0  'Int Tables Vol IV Tables 2.2B and 2.3.1'
  Na  ?  0  4  .03  .025  'Int Tables Vol IV Tables 2.2B and 2.3.1'
  O  ?  0  36  .008  .006  'Int Tables Vol IV Tables 2.2B and 2.3.1'
  S  ?  0  16  .11  .124  'Int Tables Vol IV Tables 2.2B and 2.3.1'
 
loop_
_atom_site_label
_atom_site_fract_x
_atom_site_fract_y
_atom_site_fract_z
_atom_site_U_iso_or_equiv
_atom_site_adp_type
_atom_site_calc_flag
_atom_site_calc_attached_atom
_atom_site_occupancy
_atom_site_disorder_assembly
_atom_site_disorder_group
  Na  .21770(12)  .51214(7)  .97554(7)  .0529(8)  Uani  ?  ?  1.00000  ?  ?
  O11  -.0347(2)  .57116(11)  .82342(12)  .0475(12)  Uani  ?  ?  1.00000  ?  ?
  C11  -.0862(3)  .58951(16)  .76011(17)  .0439(17)  Uani  ?  ?  1.00000  ?  ?
  C12  -.1876(3)  .56985(16)  .72762(17)  .0448(17)  Uani  ?  ?  1.00000  ?  ?
  C13  -.2354(3)  .5897(2)  .66180(18)  .055(2)  Uani  ?  ?  1.00000  ?  ?
  C14  -.1859(3)  .6289(2)  .62714(19)  .060(2)  Uani  ?  ?  1.00000  ?  ?
  C141  -.2400(4)  .6500(3)  .5544(2)  .074(3)  Uani  ?  ?  1.00000  ?  ?
  C142  -.3298(6)  .6967(4)  .5579(4)  .051(4)  Uani  ?  ?  .50000  ?  ?
  C143  -.2771(7)  .6043(4)  .5085(4)  .055(4)  Uani  ?  ?  .50000  ?  ?
  C144  -.1602(7)  .6942(4)  .5239(4)  .057(4)  Uani  ?  ?  .50000  ?  ?
  C142'  -.3595(10)  .6082(7)  .5281(6)  .121(9)  Uani  ?  ?  .50000  ?  ?
  C143'  -.1873(10)  .6108(5)  .5096(4)  .087(7)  Uani  ?  ?  .50000  ?  ?
  C144'  -.2620(10)  .7059(5)  .5484(5)  .093(7)  Uani  ?  ?  .50000  ?  ?
  C15  -.0866(3)  .64928(18)  .6611(2)  .055(2)  Uani  ?  ?  1.00000  ?  ?
  C16  -.0370(3)  .63044(16)  .72668(18)  .0461(18)  Uani  ?  ?  1.00000  ?  ?
  S1  -.26155(7)  .52562(5)  .77056(5)  .0485(5)  Uani  ?  ?  1.00000  ?  ?
  O21  .1790(2)  .57047(11)  .87513(12)  .0464(13)  Uani  ?  ?  1.00000  ?  ?
  C21  .2162(3)  .56939(14)  .81952(16)  .0364(15)  Uani  ?  ?  1.00000  ?  ?
  C22  .1798(3)  .60922(14)  .76494(18)  .0397(16)  Uani  ?  ?  1.00000  ?  ?
  C23  .2229(3)  .60770(15)  .71030(18)  .0440(17)  Uani  ?  ?  1.00000  ?  ?
  C24  .3015(3)  .56761(16)  .70679(17)  .0427(17)  Uani  ?  ?  1.00000  ?  ?
  C241  .3491(3)  .5683(2)  .6458(2)  .059(2)  Uani  ?  ?  1.00000  ?  ?
  C242  .4135(6)  .6241(4)  .6489(4)  .146(6)  Uani  ?  ?  1.00000  ?  ?
  C243  .4225(5)  .5137(3)  .6464(3)  .105(4)  Uani  ?  ?  1.00000  ?  ?
  C244  .2624(4)  .5633(3)  .5801(2)  .088(3)  Uani  ?  ?  1.00000  ?  ?
  C25  .3359(2)  .52823(15)  .76064(17)  .0379(15)  Uani  ?  ?  1.00000  ?  ?
  C26  .2938(2)  .52800(13)  .81598(16)  .0329(14)  Uani  ?  ?  1.00000  ?  ?
  S2  .08418(9)  .66478(4)  .76875(5)  .0526(5)  Uani  ?  ?  1.00000  ?  ?
  O31  .12742(17)  .44074(11)  .89704(12)  .0407(11)  Uani  ?  ?  1.00000  ?  ?
  C31  .1644(2)  .40034(14)  .86044(16)  .0326(14)  Uani  ?  ?  1.00000  ?  ?
  C32  .1091(2)  .34755(14)  .83381(17)  .0348(15)  Uani  ?  ?  1.00000  ?  ?
  C33  .1493(3)  .30799(14)  .79488(17)  .0371(15)  Uani  ?  ?  1.00000  ?  ?
  C34  .2451(3)  .31760(14)  .78051(17)  .0373(15)  Uani  ?  ?  1.00000  ?  ?
  C341  .2877(3)  .27629(16)  .7348(2)  .0485(19)  Uani  ?  ?  1.00000  ?  ?
  C342  .3932(4)  .2493(2)  .7752(3)  .079(3)  Uani  ?  ?  1.00000  ?  ?
  C343  .3049(4)  .3130(2)  .6757(2)  .071(3)  Uani  ?  ?  1.00000  ?  ?
  C344  .2145(5)  .2244(2)  .7086(3)  .087(3)  Uani  ?  ?  1.00000  ?  ?
  C35  .3009(2)  .36931(14)  .80918(17)  .0360(15)  Uani  ?  ?  1.00000  ?  ?
  C36  .2625(2)  .40972(13)  .84760(16)  .0331(14)  Uani  ?  ?  1.00000  ?  ?
  S3  .34048(6)  .47414(4)  .88220(4)  .0364(4)  Uani  ?  ?  1.00000  ?  ?
  O41  -.06787(17)  .46076(10)  .85160(11)  .0389(11)  Uani  ?  ?  1.00000  ?  ?
  C41  -.1306(2)  .42651(15)  .80472(15)  .0347(15)  Uani  ?  ?  1.00000  ?  ?
  C42  -.2226(3)  .45022(16)  .75972(16)  .0384(16)  Uani  ?  ?  1.00000  ?  ?
  C43  -.2867(3)  .41461(17)  .70969(18)  .0427(17)  Uani  ?  ?  1.00000  ?  ?
  C44  -.2654(2)  .35397(16)  .70112(18)  .0408(17)  Uani  ?  ?  1.00000  ?  ?
  C441  -.3364(3)  .31594(18)  .6441(2)  .051(2)  Uani  ?  ?  1.00000  ?  ?
  C442  -.3050(6)  .2488(4)  .6379(4)  .056(4)  Uani  ?  ?  .50000  ?  ?
  C443  -.3394(6)  .3433(4)  .5721(4)  .055(4)  Uani  ?  ?  .50000  ?  ?
  C444  -.4505(5)  .3162(4)  .6479(4)  .055(4)  Uani  ?  ?  .50000  ?  ?
  C442'  -.2682(7)  .2927(5)  .6043(5)  .072(5)  Uani  ?  ?  .50000  ?  ?
  C443'  -.4277(7)  .3519(5)  .6052(5)  .078(6)  Uani  ?  ?  .50000  ?  ?
  C444'  -.3724(7)  .2628(4)  .6827(6)  .075(6)  Uani  ?  ?  .50000  ?  ?
  C45  -.1768(2)  .33013(15)  .74683(18)  .0404(16)  Uani  ?  ?  1.00000  ?  ?
  C46  -.1105(2)  .36480(15)  .79713(17)  .0365(15)  Uani  ?  ?  1.00000  ?  ?
  S4  -.00688(7)  .32777(4)  .85730(5)  .0424(4)  Uani  ?  ?  1.00000  ?  ?
  O101  .3355(3)  .58006(15)  1.03748(15)  .090(2)  Uani  ?  ?  1.00000  ?  ?
  C102  .3422(9)  .5877(4)  1.1074(3)  .178(7)  Uani  ?  ?  1.00000  ?  ?
  C103  .3789(5)  .6430(4)  1.1287(3)  .122(5)  Uani  ?  ?  1.00000  ?  ?
  C104  .4231(5)  .6698(3)  1.0748(3)  .093(4)  Uani  ?  ?  1.00000  ?  ?
  C105  .3908(5)  .6244(3)  1.0174(3)  .099(4)  Uani  ?  ?  1.00000  ?  ?
  O201  .3032(3)  .43838(16)  1.04840(18)  .102(2)  Uani  ?  ?  1.00000  ?  ?
  C202  .2831(8)  .3744(4)  1.0470(7)  .105(7)  Uani  ?  ?  .50000  ?  ?
  C203  .3738(12)  .3445(7)  1.0545(10)  .161(13)  Uani  ?  ?  .50000  ?  ?
  C204  .4463(6)  .3801(4)  1.1234(4)  .056(4)  Uani  ?  ?  .50000  ?  ?
  C205  .4135(6)  .4416(4)  1.0925(4)  .054(4)  Uani  ?  ?  .50000  ?  ?
  C202'  .2212(9)  .3941(5)  1.0580(5)  .090(6)  Uani  ?  ?  .50000  ?  ?
  C203'  .2798(15)  .3416(5)  1.0438(7)  .138(11)  Uani  ?  ?  .50000  ?  ?
  C204'  .3872(8)  .3436(5)  1.0796(4)  .081(6)  Uani  ?  ?  .50000  ?  ?
  C205'  .3943(10)  .4224(6)  1.0839(7)  .106(4)  Uiso  ?  ?  .50000  ?  ?
  O301  -.1144(4)  .1882(2)  .5139(3)  .136(4)  Uani  ?  ?  1.00000  ?  ?
  C302  -.1455(6)  .2453(4)  .4726(4)  .123(5)  Uani  ?  ?  1.00000  ?  ?
  C303  -.0576(9)  .2819(5)  .4803(5)  .083(6)  Uani  ?  ?  .50000  ?  ?
  C304  .0351(9)  .2440(6)  .5267(6)  .105(8)  Uani  ?  ?  .50000  ?  ?
  C305  -.0121(5)  .2068(3)  .5586(3)  .101(4)  Uani  ?  ?  1.00000  ?  ?
  C303'  -.1035(8)  .2975(5)  .5227(7)  .089(7)  Uani  ?  ?  .50000  ?  ?
  C304'  -.0267(9)  .2719(5)  .5742(7)  .094(7)  Uani  ?  ?  .50000  ?  ?
  O401  -.0559(9)  .4020(3)  .5871(4)  .131(6)  Uani  ?  ?  .50000  ?  ?
  C402  -.0607(19)  .4622(6)  .5725(7)  .239(15)  Uani  ?  ?  .50000  ?  ?
  C403  .0038(9)  .4943(4)  .6291(6)  .100(8)  Uani  ?  ?  .50000  ?  ?
  C404  .0286(7)  .4571(4)  .6781(3)  .142(6)  Uani  ?  ?  1.00000  ?  ?
  C405  .0024(11)  .3942(4)  .6480(6)  .128(9)  Uani  ?  ?  .50000  ?  ?
  O401'  .0834(5)  .4270(4)  .5952(3)  .089(5)  Uani  ?  ?  .50000  ?  ?
  C402'  -.0282(11)  .4361(9)  .5631(4)  .190(15)  Uani  ?  ?  .50000  ?  ?
  C403'  -.0734(6)  .4548(5)  .6151(6)  .094(7)  Uani  ?  ?  .50000  ?  ?
  C405'  .1021(6)  .4361(4)  .6619(4)  .058(4)  Uani  ?  ?  .50000  ?  ?
  O01  .0756(6)  .5169(4)  1.0170(3)  .098(5)  Uani  ?  ?  .50000  ?  ?
  O01'  .1009(5)  .5623(3)  1.0221(3)  .070(4)  Uani  ?  ?  .50000  ?  ?
  H11  -.052(3)  .5473(17)  .837(2)  .063(12)  Uiso  ?  ?  1.00000  ?  ?
  H13  -.30471  .57590  .63993  .07300  Uiso  ?  ?  1.00000  ?  ?
  H142a  -.36343  .71244  .51403  .06800  Uiso  ?  ?  .50000  ?  ?
  H142b  -.30060  .73046  .58654  .06800  Uiso  ?  ?  .50000  ?  ?
  H142c  -.38115  .67821  .57595  .06800  Uiso  ?  ?  .50000  ?  ?
  H143a  -.30152  .61967  .46440  .07900  Uiso  ?  ?  .50000  ?  ?
  H143b  -.33118  .58298  .52089  .07900  Uiso  ?  ?  .50000  ?  ?
  H143c  -.22060  .57628  .50962  .07900  Uiso  ?  ?  .50000  ?  ?
  H144a  -.19630  .70859  .48054  .08200  Uiso  ?  ?  .50000  ?  ?
  H144b  -.10237  .66900  .51829  .08200  Uiso  ?  ?  .50000  ?  ?
  H144c  -.13359  .72516  .55355  .08200  Uiso  ?  ?  .50000  ?  ?
  H142'a  -.39759  .62128  .48529  .18400  Uiso  ?  ?  .50000  ?  ?
  H142'b  -.40538  .62732  .55908  .18400  Uiso  ?  ?  .50000  ?  ?
  H142'c  -.35326  .57085  .53746  .18400  Uiso  ?  ?  .50000  ?  ?
  H143'a  -.20787  .62437  .46360  .09800  Uiso  ?  ?  .50000  ?  ?
  H143'b  -.19905  .57046  .51294  .09800  Uiso  ?  ?  .50000  ?  ?
  H143'c  -.11019  .61802  .52481  .09800  Uiso  ?  ?  .50000  ?  ?
  H144'a  -.30078  .71540  .50296  .10700  Uiso  ?  ?  .50000  ?  ?
  H144'b  -.20285  .73046  .56146  .10700  Uiso  ?  ?  .50000  ?  ?
  H144'c  -.30841  .71580  .57706  .10700  Uiso  ?  ?  .50000  ?  ?
  H15  -.05137  .67696  .63892  .07400  Uiso  ?  ?  1.00000  ?  ?
  H21  .122(3)  .5848(19)  .864(2)  .071(13)  Uiso  ?  ?  1.00000  ?  ?
  H23  .19168  .64190  .66572  .05700  Uiso  ?  ?  1.00000  ?  ?
  H242a  .44052  .62590  .61061  .22700  Uiso  ?  ?  1.00000  ?  ?
  H242b  .47033  .62347  .68896  .22700  Uiso  ?  ?  1.00000  ?  ?
  H242c  .37153  .65863  .64985  .22700  Uiso  ?  ?  1.00000  ?  ?
  H243a  .44965  .51575  .60852  .15800  Uiso  ?  ?  1.00000  ?  ?
  H243b  .38482  .47776  .64631  .15800  Uiso  ?  ?  1.00000  ?  ?
  H243c  .47924  .51555  .68692  .15800  Uiso  ?  ?  1.00000  ?  ?
  H244a  .28923  .56463  .54222  .13100  Uiso  ?  ?  1.00000  ?  ?
  H244b  .21153  .59409  .57738  .13100  Uiso  ?  ?  1.00000  ?  ?
  H244c  .22654  .52467  .57960  .13100  Uiso  ?  ?  1.00000  ?  ?
  H25  .40290  .49382  .75969  .05000  Uiso  ?  ?  1.00000  ?  ?
  H31  .066(3)  .4456(18)  .886(2)  .070(13)  Uiso  ?  ?  1.00000  ?  ?
  H33  .10979  .27277  .77723  .05000  Uiso  ?  ?  1.00000  ?  ?
  H342a  .41883  .22324  .74600  .11900  Uiso  ?  ?  1.00000  ?  ?
  H342b  .38170  .22541  .81151  .11900  Uiso  ?  ?  1.00000  ?  ?
  H342c  .44104  .27986  .79199  .11900  Uiso  ?  ?  1.00000  ?  ?
  H343a  .33049  .28694  .64640  .10800  Uiso  ?  ?  1.00000  ?  ?
  H343b  .35645  .34335  .69255  .10800  Uiso  ?  ?  1.00000  ?  ?
  H343c  .24195  .33092  .65153  .10800  Uiso  ?  ?  1.00000  ?  ?
  H344a  .24719  .19862  .68335  .13200  Uiso  ?  ?  1.00000  ?  ?
  H344b  .15114  .23927  .68164  .13200  Uiso  ?  ?  1.00000  ?  ?
  H344c  .20334  .20262  .74621  .13200  Uiso  ?  ?  1.00000  ?  ?
  H35  .36800  .37672  .80180  .04800  Uiso  ?  ?  1.00000  ?  ?
  H43  -.34764  .43232  .68002  .05700  Uiso  ?  ?  1.00000  ?  ?
  H442a  -.35311  .22984  .60054  .07400  Uiso  ?  ?  .50000  ?  ?
  H442b  -.30624  .22718  .67829  .07400  Uiso  ?  ?  .50000  ?  ?
  H442c  -.23646  .24619  .63199  .07400  Uiso  ?  ?  .50000  ?  ?
  H443a  -.38032  .31821  .53752  .06900  Uiso  ?  ?  .50000  ?  ?
  H443b  -.26905  .34449  .56713  .06900  Uiso  ?  ?  .50000  ?  ?
  H443c  -.36673  .38271  .56785  .06900  Uiso  ?  ?  .50000  ?  ?
  H444a  -.49256  .29149  .61275  .07200  Uiso  ?  ?  .50000  ?  ?
  H444b  -.47816  .35590  .64334  .07200  Uiso  ?  ?  .50000  ?  ?
  H444c  -.45441  .30006  .69049  .07200  Uiso  ?  ?  .50000  ?  ?
  H442'a  -.31018  .27052  .56597  .08600  Uiso  ?  ?  .50000  ?  ?
  H442'b  -.21751  .26657  .63060  .08600  Uiso  ?  ?  .50000  ?  ?
  H442'c  -.23529  .32500  .58749  .08600  Uiso  ?  ?  .50000  ?  ?
  H443'a  -.47108  .32929  .57073  .09600  Uiso  ?  ?  .50000  ?  ?
  H443'b  -.40620  .38803  .58924  .09600  Uiso  ?  ?  .50000  ?  ?
  H443'c  -.46968  .36340  .63697  .09600  Uiso  ?  ?  .50000  ?  ?
  H444'a  -.41646  .23501  .65181  .08700  Uiso  ?  ?  .50000  ?  ?
  H444'b  -.41214  .27738  .71264  .08700  Uiso  ?  ?  .50000  ?  ?
  H444'c  -.31388  .24076  .70948  .08700  Uiso  ?  ?  .50000  ?  ?
  H45  -.16086  .28842  .74355  .05400  Uiso  ?  ?  1.00000  ?  ?
  H102a  .37564  .55851  1.13311  .21600  Uiso  ?  ?  1.00000  ?  ?
  H102b  .26563  .58788  1.11014  .21600  Uiso  ?  ?  1.00000  ?  ?
  H103a  .43126  .63848  1.16858  .14300  Uiso  ?  ?  1.00000  ?  ?
  H103b  .32486  .66934  1.13559  .14300  Uiso  ?  ?  1.00000  ?  ?
  H104a  .49682  .67323  1.08954  .11300  Uiso  ?  ?  1.00000  ?  ?
  H104b  .39399  .70897  1.06067  .11300  Uiso  ?  ?  1.00000  ?  ?
  H105a  .45083  .60930  1.00669  .12200  Uiso  ?  ?  1.00000  ?  ?
  H105b  .34806  .64508  .97777  .12200  Uiso  ?  ?  1.00000  ?  ?
  H202a  .24122  .36875  1.08206  .15000  Uiso  ?  ?  .50000  ?  ?
  H202b  .23010  .36626  1.00493  .15000  Uiso  ?  ?  .50000  ?  ?
  H203a  .37458  .29977  1.07540  .15000  Uiso  ?  ?  .50000  ?  ?
  H203b  .41055  .34101  1.02482  .15000  Uiso  ?  ?  .50000  ?  ?
  H204a  .42543  .37276  1.16282  .10400  Uiso  ?  ?  .50000  ?  ?
  H204b  .51817  .37483  1.13010  .10400  Uiso  ?  ?  .50000  ?  ?
  H205a  .41111  .46486  1.12565  .09200  Uiso  ?  ?  .50000  ?  ?
  H205b  .45244  .44807  1.06408  .09200  Uiso  ?  ?  .50000  ?  ?
  H202'a  .21006  .39339  1.10459  .06200  Uiso  ?  ?  .50000  ?  ?
  H202'b  .14823  .40252  1.02962  .06200  Uiso  ?  ?  .50000  ?  ?
  H203'a  .23510  .30451  1.05262  .13000  Uiso  ?  ?  .50000  ?  ?
  H203'b  .25824  .33963  .99287  .13000  Uiso  ?  ?  .50000  ?  ?
  H204'a  .39488  .32800  1.12424  .11900  Uiso  ?  ?  .50000  ?  ?
  H204'b  .42603  .32242  1.05683  .11900  Uiso  ?  ?  .50000  ?  ?
  H205'a  .40297  .43615  1.12590  .08200  Uiso  ?  ?  .50000  ?  ?
  H205'b  .44119  .43640  1.06076  .08200  Uiso  ?  ?  .50000  ?  ?
  H302a  -.17417  .23639  .42735  .15000  Uiso  ?  ?  1.00000  ?  ?
  H302b  -.19740  .26658  .48996  .15000  Uiso  ?  ?  1.00000  ?  ?
  H303a  -.04782  .29235  .43801  .10100  Uiso  ?  ?  .50000  ?  ?
  H303b  -.06724  .31990  .50306  .10100  Uiso  ?  ?  .50000  ?  ?
  H304a  .07278  .22383  .49851  .10200  Uiso  ?  ?  .50000  ?  ?
  H304b  .08612  .27060  .55638  .10200  Uiso  ?  ?  .50000  ?  ?
  H305a  .03164  .17138  .57440  .10500  Uiso  ?  ?  1.00000  ?  ?
  H305b  -.02180  .22560  .59944  .10500  Uiso  ?  ?  1.00000  ?  ?
  H303'a  -.07074  .32931  .49999  .11200  Uiso  ?  ?  .50000  ?  ?
  H303'b  -.15671  .31861  .53723  .11200  Uiso  ?  ?  .50000  ?  ?
  H304'a  .03816  .29403  .58438  .12300  Uiso  ?  ?  .50000  ?  ?
  H304'b  -.05013  .27549  .61701  .12300  Uiso  ?  ?  .50000  ?  ?
  H402a  -.02469  .46713  .53551  .24400  Uiso  ?  ?  .50000  ?  ?
  H402b  -.12475  .47650  .55984  .24400  Uiso  ?  ?  .50000  ?  ?
  H403a  -.04610  .52228  .63286  .12700  Uiso  ?  ?  .50000  ?  ?
  H403b  .06913  .51770  .62947  .12700  Uiso  ?  ?  .50000  ?  ?
  H404a  -.01483  .46917  .70824  .16400  Uiso  ?  ?  .50000  ?  ?
  H404b  .09947  .46298  .70337  .16400  Uiso  ?  ?  .50000  ?  ?
  H405a  -.03460  .37182  .67448  .15900  Uiso  ?  ?  .50000  ?  ?
  H405b  .06556  .37344  .64910  .15900  Uiso  ?  ?  .50000  ?  ?
  H402'a  .03896  .44054  .56756  .21300  Uiso  ?  ?  .50000  ?  ?
  H402'b  -.07141  .44096  .51701  .21300  Uiso  ?  ?  .50000  ?  ?
  H403'a  -.12685  .42777  .61969  .10800  Uiso  ?  ?  .50000  ?  ?
  H403'b  -.10871  .49388  .60083  .10800  Uiso  ?  ?  .50000  ?  ?
  H404'a  .04321  .50105  .69078  .16400  Uiso  ?  ?  .50000  ?  ?
  H404'b  .04320  .50105  .69078  .16400  Uiso  ?  ?  .50000  ?  ?
  H405'a  .11522  .39963  .68711  .07100  Uiso  ?  ?  .50000  ?  ?
  H405'b  .15934  .46299  .67826  .07100  Uiso  ?  ?  .50000  ?  ?
 
loop_
_atom_site_aniso_label
_atom_site_aniso_U_11
_atom_site_aniso_U_22
_atom_site_aniso_U_33
_atom_site_aniso_U_12
_atom_site_aniso_U_13
_atom_site_aniso_U_23
  Na  .0540(9)  .0680(10)  .0341(7)  .0063(7)  .0072(7)  .0012(7)
  O11  .0501(15)  .0453(14)  .0382(13)  .0086(11)  -.0033(12)  .0025(11)
  C11  .049(2)  .0417(18)  .0348(18)  .0212(16)  -.0002(16)  -.0043(14)
  C12  .042(2)  .050(2)  .0368(18)  .0211(16)  .0009(16)  -.0064(15)
  C13  .053(2)  .068(3)  .036(2)  .028(2)  -.0012(18)  -.0103(18)
  C14  .069(3)  .073(3)  .034(2)  .031(2)  .009(2)  -.0022(18)
  C141  .070(3)  .113(4)  .033(2)  .026(3)  .004(2)  .003(2)
  C142  .049(5)  .062(5)  .034(4)  .004(4)  -.002(4)  .005(3)
  C143  .061(5)  .057(5)  .040(4)  -.008(4)  .001(4)  -.001(3)
  C144  .065(5)  .074(5)  .026(3)  -.017(4)  .004(4)  .012(3)
  C142'  .095(9)  .181(14)  .060(7)  -.026(9)  -.023(6)  .049(8)
  C143'  .135(10)  .084(7)  .037(5)  .010(7)  .012(6)  .016(5)
  C144'  .141(10)  .073(6)  .054(6)  .043(7)  .007(6)  .032(5)
  C15  .063(3)  .057(2)  .042(2)  .028(2)  .010(2)  .0014(17)
  C16  .048(2)  .043(2)  .043(2)  .0184(16)  .0046(17)  -.0017(15)
  S1  .0364(5)  .0614(6)  .0447(5)  .0195(4)  .0056(4)  -.0090(4)
  O21  .0491(15)  .0521(14)  .0375(13)  .0164(12)  .0106(12)  .0043(11)
  C21  .0388(18)  .0335(16)  .0340(17)  -.0035(13)  .0044(15)  -.0025(13)
  C22  .0384(18)  .0299(16)  .044(2)  -.0015(13)  -.0002(16)  .0018(14)
  C23  .047(2)  .0404(18)  .0385(18)  -.0139(15)  .0010(17)  .0062(15)
  C24  .0356(18)  .052(2)  .0374(18)  -.0170(15)  .0044(16)  -.0014(15)
  C241  .049(2)  .086(3)  .044(2)  -.017(2)  .014(2)  .003(2)
  C242  .182(7)  .170(7)  .124(5)  -.123(6)  .105(5)  -.048(5)
  C243  .090(4)  .168(6)  .069(3)  .035(4)  .043(3)  .011(4)
  C244  .083(4)  .137(5)  .044(3)  .007(3)  .018(3)  -.000(3)
  C25  .0304(16)  .0402(17)  .0401(18)  -.0118(14)  .0041(15)  -.0059(14)
  C26  .0297(16)  .0302(15)  .0347(16)  -.0053(12)  .0015(14)  -.0016(12)
  S2  .0636(6)  .0318(4)  .0556(6)  .0105(4)  .0044(5)  .0018(4)
  O31  .0276(12)  .0495(14)  .0433(13)  .0049(10)  .0068(11)  .0001(11)
  C31  .0267(15)  .0343(15)  .0331(16)  .0052(12)  .0020(14)  .0083(13)
  C32  .0257(15)  .0362(16)  .0406(18)  -.0002(12)  .0056(14)  .0140(13)
  C33  .0387(18)  .0305(15)  .0386(18)  -.0049(13)  .0040(15)  .0072(13)
  C34  .0400(18)  .0325(16)  .0387(18)  -.0016(13)  .0095(15)  .0053(13)
  C341  .060(2)  .0396(19)  .051(2)  -.0121(17)  .025(2)  -.0047(16)
  C342  .096(4)  .071(3)  .081(3)  .032(3)  .044(3)  -.005(3)
  C343  .111(4)  .061(3)  .052(2)  -.022(3)  .037(3)  -.005(2)
  C344  .118(4)  .066(3)  .095(4)  -.045(3)  .059(3)  -.042(3)
  C35  .0309(16)  .0338(16)  .0422(18)  .0018(13)  .0078(15)  .0070(13)
  C36  .0278(16)  .0281(14)  .0394(17)  -.0008(12)  .0019(14)  .0052(13)
  S3  .0281(4)  .0357(4)  .0407(4)  -.0009(3)  .0009(4)  .0019(3)
  O41  .0348(12)  .0503(13)  .0295(11)  .0078(10)  .0045(10)  -.0019(10)
  C41  .0257(15)  .052(2)  .0272(16)  .0030(13)  .0093(14)  .0015(14)
  C42  .0328(17)  .051(2)  .0333(17)  .0102(14)  .0124(15)  -.0002(14)
  C43  .0267(16)  .060(2)  .041(2)  .0062(15)  .0082(15)  .0009(16)
  C44  .0261(16)  .054(2)  .042(2)  -.0012(14)  .0078(15)  .0007(16)
  C441  .0307(18)  .058(2)  .059(2)  -.0013(16)  .0047(18)  -.0085(19)
  C442  .042(4)  .053(4)  .061(5)  -.005(3)  -.009(4)  -.018(4)
  C443  .051(5)  .074(5)  .034(4)  -.017(4)  .004(4)  -.012(4)
  C444  .025(3)  .081(6)  .053(5)  -.013(4)  .002(3)  -.014(4)
  C442'  .063(6)  .083(6)  .061(6)  .001(5)  -.001(5)  -.035(5)
  C443'  .051(5)  .083(7)  .080(7)  -.002(5)  -.015(5)  -.033(5)
  C444'  .057(5)  .063(6)  .099(8)  -.021(4)  .012(5)  -.029(5)
  C45  .0272(16)  .0438(18)  .050(2)  -.0016(14)  .0096(16)  .0061(15)
  C46  .0246(15)  .0449(18)  .0402(18)  .0020(13)  .0089(14)  .0107(14)
  S4  .0286(4)  .0478(5)  .0482(5)  -.0019(3)  .0058(4)  .0206(4)
  O101  .152(4)  .071(2)  .0436(17)  -.026(2)  .021(2)  -.0073(15)
  C102  .364(13)  .130(6)  .049(3)  -.126(8)  .069(5)  -.032(4)
  C103  .119(5)  .184(7)  .074(4)  -.056(5)  .044(4)  -.047(4)
  C104  .088(4)  .094(4)  .088(4)  -.027(3)  .007(3)  -.007(3)
  C105  .098(4)  .142(5)  .062(3)  -.051(4)  .031(3)  -.013(3)
  O201  .116(3)  .074(2)  .081(2)  -.043(2)  -.036(2)  .0302(19)
  C202  .060(6)  .056(6)  .165(12)  -.022(5)  -.030(7)  .053(7)
  C203  .109(11)  .105(11)  .26(2)  -.063(9)  .040(12)  -.086(12)
  C204  .054(5)  .051(4)  .050(5)  .002(4)  -.012(4)  .005(4)
  C205  .044(4)  .059(5)  .056(5)  .000(4)  .010(4)  -.006(4)
  C202'  .111(9)  .080(7)  .056(6)  -.030(6)  -.021(6)  .024(5)
  C203'  .29(2)  .052(6)  .101(9)  .008(9)  .112(12)  .004(6)
  C204'  .074(6)  .128(9)  .045(5)  .039(6)  .019(5)  .038(5)
  O301  .139(4)  .145(4)  .131(4)  -.058(3)  .048(3)  -.039(3)
  C302  .115(5)  .132(6)  .124(6)  .026(5)  .036(5)  .019(5)
  C303  .092(8)  .065(6)  .080(7)  -.014(5)  -.000(6)  -.010(5)
  C304  .092(8)  .140(11)  .083(8)  -.050(8)  .026(7)  .006(7)
  C305  .098(4)  .101(4)  .093(4)  -.029(4)  .006(4)  .004(3)
  C303'  .057(6)  .073(7)  .136(10)  .002(5)  .026(6)  -.020(7)
  C304'  .077(7)  .072(7)  .141(11)  -.021(6)  .042(7)  .003(7)
  O401  .225(11)  .076(5)  .074(5)  -.021(6)  .011(6)  -.012(4)
  C402  .34(3)  .089(10)  .149(15)  -.033(14)  -.172(18)  .013(10)
  C403  .109(9)  .061(6)  .120(10)  .006(6)  .017(8)  -.027(6)
  C404  .189(8)  .158(7)  .071(4)  -.036(6)  .020(5)  -.005(4)
  C405  .137(12)  .083(8)  .121(11)  -.020(8)  -.042(9)  .053(8)
  O401'  .060(4)  .135(7)  .074(5)  .026(4)  .020(4)  -.027(4)
  C402'  .225(19)  .29(2)  .044(6)  .189(18)  .021(9)  .029(10)
  C403'  .044(5)  .098(8)  .154(11)  -.006(5)  .048(6)  -.037(8)
  C405'  .054(5)  .061(5)  .055(5)  -.003(4)  .010(4)  -.006(4)
  O01  .093(5)  .156(7)  .056(4)  -.041(5)  .040(4)  -.054(4)
  O01'  .059(4)  .114(5)  .038(3)  .012(3)  .013(3)  -.007(3)
 
 
# 5. Molecular Geometry
#----------------------
 
loop_
_geom_bond_atom_site_label_1
_geom_bond_atom_site_label_2
_geom_bond_site_symmetry_1
_geom_bond_site_symmetry_2
_geom_bond_distance
_geom_bond_publ_flag                 #<< enter YES for value to be published
  Na  O21  .  .  2.371(3)  ?
  Na  O31  .  .  2.346(3)  ?
  Na  S3  .  .  2.949(2)  ?
  Na  O101  .  .  2.294(4)  ?
  Na  O201  .  .  2.300(4)  ?
  Na  O01  .  .  2.267(8)  ?
  Na  O01'  .  .  2.311(7)  ?
  O11  C11  .  .  1.359(4)  ?
  O11  H11  .  .  .67(4)  ?
  C11  C12  .  .  1.402(5)  ?
  C11  C16  .  .  1.400(6)  ?
  C12  C13  .  .  1.401(5)  ?
  C12  S1  .  .  1.778(4)  ?
  C13  C14  .  .  1.393(6)  ?
  C13  H13  .  .  .959(4)  ?
  C14  C141  .  .  1.546(5)  ?
  C14  C15  .  .  1.391(6)  ?
  C141  C142  .  .  1.595(10)  ?
  C141  C143  .  .  1.381(9)  ?
  C141  C144  .  .  1.682(11)  ?
  C141  C142'  .  .  1.790(15)  ?
  C141  C143'  .  .  1.561(13)  ?
  C141  C144'  .  .  1.273(12)  ?
  C142  C144'  .  .  .991(16)  ?
  C142  H142a  .  .  .957(7)  ?
  C142  H142b  .  .  .967(8)  ?
  C142  H142c  .  .  .950(9)  ?
  C142  H144'a  .  .  1.350(8)  ?
  C142  H144'c  .  .  .596(7)  ?
  C143  C142'  .  .  1.265(17)  ?
  C143  C143'  .  .  1.194(16)  ?
  C143  H143a  .  .  .941(7)  ?
  C143  H143b  .  .  .949(9)  ?
  C143  H143c  .  .  .968(9)  ?
  C143  H142'c  .  .  1.498(9)  ?
  C143  H143'b  .  .  1.261(9)  ?
  C144  C143'  .  .  1.894(14)  ?
  C144  C144'  .  .  1.582(17)  ?
  C144  H144a  .  .  .946(7)  ?
  C144  H144b  .  .  .981(9)  ?
  C144  H144c  .  .  .922(8)  ?
  C144  H144'b  .  .  1.338(9)  ?
  C142'  H143b  .  .  .711(15)  ?
  C142'  H142'a  .  .  .934(11)  ?
  C142'  H142'b  .  .  1.078(14)  ?
  C142'  H142'c  .  .  .849(16)  ?
  C143'  H143c  .  .  .883(12)  ?
  C143'  H143'a  .  .  .959(9)  ?
  C143'  H143'b  .  .  .913(11)  ?
  C143'  H143'c  .  .  .999(13)  ?
  C144'  H142a  .  .  1.349(12)  ?
  C144'  H142b  .  .  1.177(12)  ?
  C144'  H144'a  .  .  .960(9)  ?
  C144'  H144'b  .  .  .934(12)  ?
  C144'  H144'c  .  .  .983(13)  ?
  C15  C16  .  .  1.396(5)  ?
  C15  H15  .  .  .957(4)  ?
  C16  S2  .  .  1.779(4)  ?
  S1  C42  .  .  1.781(4)  ?
  O21  C21  .  .  1.359(5)  ?
  O21  H21  .  .  .79(4)  ?
  C21  C22  .  .  1.407(4)  ?
  C21  C26  .  .  1.396(5)  ?
  C22  C23  .  .  1.389(6)  ?
  C22  S2  .  .  1.785(4)  ?
  C23  C24  .  .  1.385(5)  ?
  C23  H23  .  .  1.175(3)  ?
  C24  C241  .  .  1.546(6)  ?
  C24  C25  .  .  1.387(5)  ?
  C241  C242  .  .  1.496(10)  ?
  C241  C243  .  .  1.550(9)  ?
  C241  C244  .  .  1.525(6)  ?
  C242  H242a  .  .  .948(9)  ?
  C242  H242b  .  .  .955(7)  ?
  C242  H242c  .  .  .950(8)  ?
  C243  H243a  .  .  .941(7)  ?
  C243  H243b  .  .  .941(7)  ?
  C243  H243c  .  .  .962(5)  ?
  C244  H244a  .  .  .939(6)  ?
  C244  H244b  .  .  .951(6)  ?
  C244  H244c  .  .  .978(6)  ?
  C25  C26  .  .  1.393(5)  ?
  C25  H25  .  .  1.175(3)  ?
  C26  S3  .  .  1.791(3)  ?
  O31  C31  .  .  1.343(4)  ?
  O31  H31  .  .  .79(4)  ?
  C31  C32  .  .  1.412(4)  ?
  C31  C36  .  .  1.411(5)  ?
  C32  C33  .  .  1.385(5)  ?
  C32  S4  .  .  1.785(4)  ?
  C33  C34  .  .  1.396(5)  ?
  C33  H33  .  .  .956(3)  ?
  C34  C341  .  .  1.524(5)  ?
  C34  C35  .  .  1.406(4)  ?
  C341  C342  .  .  1.544(6)  ?
  C341  C343  .  .  1.527(6)  ?
  C341  C344  .  .  1.508(6)  ?
  C342  H342a  .  .  .957(6)  ?
  C342  H342b  .  .  .960(6)  ?
  C342  H342c  .  .  .930(5)  ?
  C343  H343a  .  .  .959(5)  ?
  C343  H343b  .  .  .956(5)  ?
  C343  H343c  .  .  .938(5)  ?
  C344  H344a  .  .  .952(6)  ?
  C344  H344b  .  .  .934(5)  ?
  C344  H344c  .  .  .955(6)  ?
  C35  C36  .  .  1.378(5)  ?
  C35  H35  .  .  .955(4)  ?
  C36  S3  .  .  1.795(3)  ?
  O41  C41  .  .  1.329(4)  ?
  C41  C42  .  .  1.420(4)  ?
  C41  C46  .  .  1.411(5)  ?
  C42  C43  .  .  1.391(5)  ?
  C43  C44  .  .  1.395(5)  ?
  C43  H43  .  .  .956(3)  ?
  C44  C441  .  .  1.542(5)  ?
  C44  C45  .  .  1.398(4)  ?
  C441  C442  .  .  1.561(9)  ?
  C441  C443  .  .  1.588(9)  ?
  C441  C444  .  .  1.534(9)  ?
  C441  C442'  .  .  1.466(12)  ?
  C441  C443'  .  .  1.490(10)  ?
  C441  C444'  .  .  1.564(11)  ?
  C442  C442'  .  .  1.359(14)  ?
  C442  C444'  .  .  1.476(15)  ?
  C442  H442a  .  .  .955(8)  ?
  C442  H442b  .  .  .961(9)  ?
  C442  H442c  .  .  .950(9)  ?
  C442  H442'b  .  .  1.271(9)  ?
  C443  C442'  .  .  1.500(12)  ?
  C443  C443'  .  .  1.514(14)  ?
  C443  H443a  .  .  .949(7)  ?
  C443  H443b  .  .  .966(9)  ?
  C443  H443c  .  .  .942(9)  ?
  C443  H442'c  .  .  1.392(8)  ?
  C443  H443'b  .  .  1.435(9)  ?
  C444  C443'  .  .  1.275(14)  ?
  C444  C444'  .  .  1.610(12)  ?
  C444  H444a  .  .  .958(8)  ?
  C444  H444b  .  .  .948(9)  ?
  C444  H444c  .  .  .959(9)  ?
  C444  H443'c  .  .  1.086(9)  ?
  C442'  H442c  .  .  1.200(10)  ?
  C442'  H443b  .  .  1.376(10)  ?
  C442'  H442'a  .  .  .968(9)  ?
  C442'  H442'b  .  .  .942(9)  ?
  C442'  H442'c  .  .  .949(10)  ?
  C443'  H443c  .  .  1.429(11)  ?
  C443'  H444b  .  .  1.161(11)  ?
  C443'  H443'a  .  .  .931(9)  ?
  C443'  H443'b  .  .  .939(11)  ?
  C443'  H443'c  .  .  .997(11)  ?
  C444'  H442b  .  .  1.201(10)  ?
  C444'  H444c  .  .  1.409(10)  ?
  C444'  H444'a  .  .  .961(9)  ?
  C444'  H444'b  .  .  .967(12)  ?
  C444'  H444'c  .  .  .956(9)  ?
  C45  C46  .  .  1.394(4)  ?
  C45  H45  .  .  .955(3)  ?
  C46  S4  .  .  1.783(3)  ?
  O101  C102  .  .  1.424(7)  ?
  O101  C105  .  .  1.355(8)  ?
  C102  C103  .  .  1.347(11)  ?
  C102  H102a  .  .  .878(8)  ?
  C102  H102b  .  .  1.032(12)  ?
  C103  C104  .  .  1.506(10)  ?
  C103  H103a  .  .  .926(6)  ?
  C103  H103b  .  .  .965(8)  ?
  C104  C105  .  .  1.522(8)  ?
  C104  H104a  .  .  .947(6)  ?
  C104  H104b  .  .  .963(6)  ?
  C105  H105a  .  .  .942(7)  ?
  C105  H105b  .  .  .973(5)  ?
  O201  C202  .  .  1.443(10)  ?
  O201  C205  .  .  1.503(8)  ?
  O201  C202'  .  .  1.516(13)  ?
  O201  C205'  .  .  1.283(13)  ?
  C202  C203  .  .  1.345(19)  ?
  C202  C202'  .  .  1.008(17)  ?
  C202  C203'  .  .  .730(15)  ?
  C202  C204'  .  .  1.525(14)  ?
  C202  C205'  .  .  1.811(16)  ?
  C202  H202a  .  .  1.027(14)  ?
  C202  H202b  .  .  .973(11)  ?
  C202  H203'b  .  .  1.320(13)  ?
  C203  C204  .  .  1.680(19)  ?
  C203  C203'  .  .  1.21(3)  ?
  C203  C204'  .  .  .50(2)  ?
  C203  C205'  .  .  1.82(2)  ?
  C203  H203a  .  .  1.080(16)  ?
  C203  H203b  .  .  .88(2)  ?
  C203  H204'a  .  .  1.43(2)  ?
  C203  H204'b  .  .  .839(16)  ?
  C204  C205  .  .  1.518(11)  ?
  C204  C204'  .  .  1.304(12)  ?
  C204  C205'  .  .  1.310(15)  ?
  C204  H204a  .  .  .935(9)  ?
  C204  H204b  .  .  .934(9)  ?
  C204  H204'a  .  .  1.343(8)  ?
  C204  H205'a  .  .  1.377(8)  ?
  C205  C205'  .  .  .504(15)  ?
  C205  H205a  .  .  .862(9)  ?
  C205  H205b  .  .  .887(9)  ?
  C205  H205'a  .  .  .746(9)  ?
  C205  H205'b  .  .  .836(9)  ?
  C202'  C203'  .  .  1.47(2)  ?
  C202'  H202a  .  .  .750(10)  ?
  C202'  H202b  .  .  1.285(11)  ?
  C202'  H202'a  .  .  1.007(11)  ?
  C202'  H202'b  .  .  1.004(11)  ?
  C203'  C204'  .  .  1.42(2)  ?
  C203'  H202a  .  .  1.206(17)  ?
  C203'  H202b  .  .  1.044(13)  ?
  C203'  H203'a  .  .  1.057(16)  ?
  C203'  H203'b  .  .  1.009(13)  ?
  C204'  C205'  .  .  1.749(18)  ?
  C204'  H203a  .  .  .987(12)  ?
  C204'  H203b  .  .  1.244(10)  ?
  C204'  H204'a  .  .  .960(10)  ?
  C204'  H204'b  .  .  .913(11)  ?
  C205'  H205a  .  .  1.254(13)  ?
  C205'  H205b  .  .  1.119(15)  ?
  C205'  H205'a  .  .  .894(14)  ?
  C205'  H205'b  .  .  .931(15)  ?
  O301  C302  .  .  1.519(9)  ?
  O301  C305  .  .  1.479(7)  ?
  C302  C303  .  .  1.394(14)  ?
  C302  C303'  .  .  1.549(14)  ?
  C302  H302a  .  .  .927(7)  ?
  C302  H302b  .  .  .976(8)  ?
  C303  C304  .  .  1.582(16)  ?
  C303  C303'  .  .  1.237(19)  ?
  C303  C304'  .  .  1.873(18)  ?
  C303  H303a  .  .  .940(12)  ?
  C303  H303b  .  .  .988(11)  ?
  C303  H303'a  .  .  1.156(11)  ?
  C304  C305  .  .  1.311(16)  ?
  C304  C304'  .  .  1.56(2)  ?
  C304  H304a  .  .  .968(14)  ?
  C304  H304b  .  .  .978(12)  ?
  C305  C304'  .  .  1.502(13)  ?
  C305  H305a  .  .  .979(6)  ?
  C305  H305b  .  .  .975(7)  ?
  C303'  C304'  .  .  1.378(15)  ?
  C303'  H302b  .  .  1.423(10)  ?
  C303'  H303b  .  .  .862(13)  ?
  C303'  H303'a  .  .  1.005(12)  ?
  C303'  H303'b  .  .  .959(12)  ?
  C304'  H305b  .  .  1.145(12)  ?
  C304'  H304'a  .  .  .963(11)  ?
  C304'  H304'b  .  .  1.011(15)  ?
  O401  C402  .  .  1.367(15)  ?
  O401  C405  .  .  1.294(14)  ?
  O401  O401'  .  .  1.893(13)  ?
  O401  C402'  .  .  1.02(2)  ?
  O401  C403'  .  .  1.351(14)  ?
  O401  H403'a  .  .  1.412(11)  ?
  C402  C403  .  .  1.435(18)  ?
  C402  C402'  .  .  .78(3)  ?
  C402  C403'  .  .  .95(2)  ?
  C402  H402a  .  .  1.00(2)  ?
  C402  H402b  .  .  .88(2)  ?
  C402  H402'a  .  .  1.43(2)  ?
  C402  H402'b  .  .  1.206(15)  ?
  C402  H403'b  .  .  1.20(2)  ?
  C403  C404  .  .  1.275(12)  ?
  C403  C402'  .  .  1.837(18)  ?
  C403  C403'  .  .  1.321(14)  ?
  C403  C405'  .  .  1.830(12)  ?
  C403  H403a  .  .  .925(11)  ?
  C403  H403b  .  .  1.007(12)  ?
  C403  H403'b  .  .  1.449(12)  ?
  C403  H404'a  .  .  1.243(11)  ?
  C403  H404'b  .  .  1.243(11)  ?
  C404  C405  .  .  1.526(12)  ?
  C404  C403'  .  .  1.603(11)  ?
  C404  C405'  .  .  1.204(12)  ?
  C404  H404a  .  .  .989(8)  ?
  C404  H404b  .  .  .953(8)  ?
  C404  H404'a  .  .  1.015(8)  ?
  C404  H404'b  .  .  1.015(8)  ?
  C405  O401'  .  .  1.865(17)  ?
  C405  C402'  .  .  1.920(17)  ?
  C405  C403'  .  .  1.705(15)  ?
  C405  C405'  .  .  1.577(15)  ?
  C405  H405a  .  .  .962(14)  ?
  C405  H405b  .  .  .951(14)  ?
  O401'  C402'  .  .  1.464(15)  ?
  O401'  C405'  .  .  1.340(10)  ?
  O401'  H402'a  .  .  .762(6)  ?
  C402'  C403'  .  .  1.418(18)  ?
  C402'  H402a  .  .  .900(16)  ?
  C402'  H402'a  .  .  .876(15)  ?
  C402'  H402'b  .  .  .973(9)  ?
  C403'  H402b  .  .  1.253(11)  ?
  C403'  H403'a  .  .  .951(10)  ?
  C403'  H403'b  .  .  .992(11)  ?
  C405'  H404b  .  .  1.047(8)  ?
  C405'  H405b  .  .  1.472(8)  ?
  C405'  H405'a  .  .  .951(8)  ?
  C405'  H405'b  .  .  .953(7)  ?
  O01  O01'  .  .  1.060(11)  ?
  H142a  H144'a  .  .  .92025(12)  ?
  H142b  H144'c  .  .  .37885(5)  ?
  H143b  H142'c  .  .  .57183(6)  ?
  H143c  H143'b  .  .  .30420(4)  ?
  H144c  H144'b  .  .  .98142(14)  ?
  H442b  H444'c  .  .  .73860(12)  ?
  H442c  H442'b  .  .  .52160(7)  ?
  H443b  H442'c  .  .  .67962(7)  ?
  H443c  H443'b  .  .  .77679(9)  ?
  H444b  H443'c  .  .  .25547(3)  ?
  H444c  H444'b  .  .  .79853(8)  ?
  H202a  H202'a  .  .  .88619(9)  ?
  H202b  H203'b  .  .  .77374(9)  ?
  H203b  H204'b  .  .  .75616(11)  ?
  H205a  H205'a  .  .  .64606(11)  ?
  H205b  H205'b  .  .  .29740(4)  ?
  H303b  H303'a  .  .  .21935(4)  ?
  H402a  H402'b  .  .  .85969(9)  ?
  H402b  H403'b  .  .  .89784(15)  ?
 
loop_
_geom_angle_atom_site_label_1
_geom_angle_atom_site_label_2
_geom_angle_atom_site_label_3
_geom_angle_site_symmetry_1
_geom_angle_site_symmetry_2
_geom_angle_site_symmetry_3
_geom_angle
_geom_angle_publ_flag                #<< enter YES for value to be published
  O21  Na  O31  .  .  .  79.57(9)  ?
  O21  Na  S3  .  .  .  67.66(8)  ?
  O21  Na  O101  .  .  .  94.63(12)  ?
  O21  Na  O201  .  .  .  155.23(15)  ?
  O21  Na  O01  .  .  .  107.0(2)  ?
  O21  Na  O01'  .  .  .  94.80(17)  ?
  O31  Na  S3  .  .  .  68.28(8)  ?
  O31  Na  O101  .  .  .  166.05(15)  ?
  O31  Na  O201  .  .  .  92.23(12)  ?
  O31  Na  O01  .  .  .  88.1(2)  ?
  O31  Na  O01'  .  .  .  109.52(17)  ?
  S3  Na  O101  .  .  .  97.79(12)  ?
  S3  Na  O201  .  .  .  87.58(12)  ?
  S3  Na  O01  .  .  .  156.2(2)  ?
  S3  Na  O01'  .  .  .  162.45(16)  ?
  O101  Na  O201  .  .  .  87.85(13)  ?
  O101  Na  O01  .  .  .  105.8(2)  ?
  O101  Na  O01'  .  .  .  83.5(2)  ?
  O201  Na  O01  .  .  .  95.9(2)  ?
  O201  Na  O01'  .  .  .  110.0(2)  ?
  O01  Na  O01'  .  .  .  26.7(3)  ?
  C11  O11  H11  .  .  .  120(3)  ?
  O11  C11  C12  .  .  .  122.3(3)  ?
  O11  C11  C16  .  .  .  118.8(3)  ?
  C12  C11  C16  .  .  .  118.8(3)  ?
  C11  C12  C13  .  .  .  119.3(4)  ?
  C11  C12  S1  .  .  .  121.4(3)  ?
  C13  C12  S1  .  .  .  119.0(3)  ?
  C12  C13  C14  .  .  .  122.4(3)  ?
  C12  C13  H13  .  .  .  118.7(4)  ?
  C14  C13  H13  .  .  .  118.9(4)  ?
  C13  C14  C141  .  .  .  121.5(4)  ?
  C13  C14  C15  .  .  .  117.3(3)  ?
  C141  C14  C15  .  .  .  121.2(4)  ?
  C14  C141  C142  .  .  .  108.2(4)  ?
  C14  C141  C143  .  .  .  115.2(5)  ?
  C14  C141  C144  .  .  .  111.1(4)  ?
  C14  C141  C142'  .  .  .  106.3(5)  ?
  C14  C141  C143'  .  .  .  103.6(5)  ?
  C14  C141  C144'  .  .  .  115.1(6)  ?
  C142  C141  C143  .  .  .  111.9(5)  ?
  C142  C141  C144  .  .  .  100.9(5)  ?
  C142  C141  C142'  .  .  .  74.8(6)  ?
  C142  C141  C143'  .  .  .  147.8(5)  ?
  C142  C141  C144'  .  .  .  38.4(7)  ?
  C143  C141  C144  .  .  .  108.6(5)  ?
  C143  C141  C142'  .  .  .  44.7(6)  ?
  C143  C141  C143'  .  .  .  47.4(6)  ?
  C143  C141  C144'  .  .  .  128.2(6)  ?
  C144  C141  C142'  .  .  .  141.6(5)  ?
  C144  C141  C143'  .  .  .  71.4(6)  ?
  C144  C141  C144'  .  .  .  63.0(7)  ?
  C142'  C141  C143'  .  .  .  91.9(7)  ?
  C142'  C141  C144'  .  .  .  108.3(8)  ?
  C143'  C141  C144'  .  .  .  127.8(8)  ?
  C141  C142  C144'  .  .  .  52.9(7)  ?
  C141  C142  H142a  .  .  .  111.1(7)  ?
  C141  C142  H142b  .  .  .  110.4(6)  ?
  C141  C142  H142c  .  .  .  111.0(7)  ?
  C141  C142  H144'a  .  .  .  77.2(5)  ?
  C141  C142  H144'c  .  .  .  105.2(9)  ?
  C144'  C142  H142a  .  .  .  87.6(9)  ?
  C144'  C142  H142b  .  .  .  73.9(8)  ?
  C144'  C142  H142c  .  .  .  161.3(10)  ?
  C144'  C142  H144'a  .  .  .  45.3(6)  ?
  C144'  C142  H144'c  .  .  .  71.7(10)  ?
  H142a  C142  H142b  .  .  .  107.5(8)  ?
  H142a  C142  H142c  .  .  .  108.8(7)  ?
  H142a  C142  H144'a  .  .  .  42.9(3)  ?
  H142a  C142  H144'c  .  .  .  112.4(11)  ?
  H142b  C142  H142c  .  .  .  108.0(8)  ?
  H142b  C142  H144'a  .  .  .  96.5(6)  ?
  H142b  C142  H144'c  .  .  .  5.8(3)  ?
  H142c  C142  H144'a  .  .  .  148.4(7)  ?
  H142c  C142  H144'c  .  .  .  108.3(11)  ?
  H144'a  C142  H144'c  .  .  .  98.1(9)  ?
  C141  C143  C142'  .  .  .  85.0(8)  ?
  C141  C143  C143'  .  .  .  74.2(7)  ?
  C141  C143  H143a  .  .  .  111.0(7)  ?
  C141  C143  H143b  .  .  .  109.8(8)  ?
  C141  C143  H143c  .  .  .  108.8(7)  ?
  C141  C143  H142'c  .  .  .  104.3(6)  ?
  C141  C143  H143'b  .  .  .  104.6(6)  ?
  C142'  C143  C143'  .  .  .  158.3(10)  ?
  C142'  C143  H143a  .  .  .  100.1(8)  ?
  C142'  C143  H143b  .  .  .  33.8(8)  ?
  C142'  C143  H143c  .  .  .  140.0(11)  ?
  C142'  C143  H142'c  .  .  .  34.5(8)  ?
  C142'  C143  H143'b  .  .  .  141.3(10)  ?
  C143'  C143  H143a  .  .  .  93.4(9)  ?
  C143'  C143  H143b  .  .  .  151.3(9)  ?
  C143'  C143  H143c  .  .  .  46.8(7)  ?
  C143'  C143  H142'c  .  .  .  145.9(8)  ?
  C143'  C143  H143'b  .  .  .  43.6(6)  ?
  H143a  C143  H143b  .  .  .  110.3(8)  ?
  H143a  C143  H143c  .  .  .  108.7(9)  ?
  H143a  C143  H142'c  .  .  .  117.8(7)  ?
  H143a  C143  H143'b  .  .  .  110.5(8)  ?
  H143b  C143  H143c  .  .  .  108.1(8)  ?
  H143b  C143  H142'c  .  .  .  7.63(17)  ?
  H143b  C143  H143'b  .  .  .  110.5(7)  ?
  H143c  C143  H142'c  .  .  .  105.8(7)  ?
  H143c  C143  H143'b  .  .  .  4.26(10)  ?
  H142'c  C143  H143'b  .  .  .  107.7(6)  ?
  C141  C144  C143'  .  .  .  51.3(5)  ?
  C141  C144  C144'  .  .  .  45.8(5)  ?
  C141  C144  H144a  .  .  .  109.7(7)  ?
  C141  C144  H144b  .  .  .  107.5(7)  ?
  C141  C144  H144c  .  .  .  110.9(7)  ?
  C141  C144  H144'b  .  .  .  74.5(5)  ?
  C143'  C144  C144'  .  .  .  93.9(7)  ?
  C143'  C144  H144a  .  .  .  99.0(6)  ?
  C143'  C144  H144b  .  .  .  63.0(6)  ?
  C143'  C144  H144c  .  .  .  148.5(7)  ?
  C143'  C144  H144'b  .  .  .  125.8(7)  ?
  C144'  C144  H144a  .  .  .  89.1(7)  ?
  C144'  C144  H144b  .  .  .  153.0(9)  ?
  C144'  C144  H144c  .  .  .  83.0(7)  ?
  C144'  C144  H144'b  .  .  .  36.1(4)  ?
  H144a  C144  H144b  .  .  .  107.2(8)  ?
  H144a  C144  H144c  .  .  .  112.2(9)  ?
  H144a  C144  H144'b  .  .  .  98.9(7)  ?
  H144b  C144  H144c  .  .  .  109.1(8)  ?
  H144b  C144  H144'b  .  .  .  150.9(7)  ?
  H144c  C144  H144'b  .  .  .  47.2(4)  ?
  C141  C142'  C143  .  .  .  50.2(6)  ?
  C141  C142'  H143b  .  .  .  89.7(12)  ?
  C141  C142'  H142'a  .  .  .  109.6(12)  ?
  C141  C142'  H142'b  .  .  .  102.2(9)  ?
  C141  C142'  H142'c  .  .  .  114.2(11)  ?
  C143  C142'  H143b  .  .  .  47.9(9)  ?
  C143  C142'  H142'a  .  .  .  91.1(11)  ?
  C143  C142'  H142'b  .  .  .  152.4(13)  ?
  C143  C142'  H142'c  .  .  .  88.0(12)  ?
  H143b  C142'  H142'a  .  .  .  103.5(14)  ?
  H143b  C142'  H142'b  .  .  .  147.7(18)  ?
  H143b  C142'  H142'c  .  .  .  41.8(9)  ?
  H142'a  C142'  H142'b  .  .  .  100.6(12)  ?
  H142'a  C142'  H142'c  .  .  .  120.8(15)  ?
  H142'b  C142'  H142'c  .  .  .  106.6(14)  ?
  C141  C143'  C143  .  .  .  58.4(7)  ?
  C141  C143'  C144  .  .  .  57.3(5)  ?
  C141  C143'  H143c  .  .  .  100.3(11)  ?
  C141  C143'  H143'a  .  .  .  110.5(9)  ?
  C141  C143'  H143'b  .  .  .  112.8(11)  ?
  C141  C143'  H143'c  .  .  .  107.9(8)  ?
  C143  C143'  C144  .  .  .  105.5(9)  ?
  C143  C143'  H143c  .  .  .  53.0(8)  ?
  C143  C143'  H143'a  .  .  .  90.0(9)  ?
  C143  C143'  H143'b  .  .  .  72.1(9)  ?
  C143  C143'  H143'c  .  .  .  163.2(11)  ?
  C144  C143'  H143c  .  .  .  156.9(13)  ?
  C144  C143'  H143'a  .  .  .  80.6(7)  ?
  C144  C143'  H143'b  .  .  .  167.0(9)  ?
  C144  C143'  H143'c  .  .  .  70.0(7)  ?
  H143c  C143'  H143'a  .  .  .  105.2(9)  ?
  H143c  C143'  H143'b  .  .  .  19.4(2)  ?
  H143c  C143'  H143'c  .  .  .  127.6(12)  ?
  H143'a  C143'  H143'b  .  .  .  111.9(10)  ?
  H143'a  C143'  H143'c  .  .  .  104.8(12)  ?
  H143'b  C143'  H143'c  .  .  .  108.4(11)  ?
  C141  C144'  C142  .  .  .  88.7(10)  ?
  C141  C144'  C144  .  .  .  71.3(7)  ?
  C141  C144'  H142a  .  .  .  109.1(8)  ?
  C141  C144'  H142b  .  .  .  121.0(10)  ?
  C141  C144'  H144'a  .  .  .  111.0(9)  ?
  C141  C144'  H144'b  .  .  .  112.8(11)  ?
  C141  C144'  H144'c  .  .  .  108.9(10)  ?
  C142  C144'  C144  .  .  .  157.7(11)  ?
  C142  C144'  H142a  .  .  .  45.2(6)  ?
  C142  C144'  H142b  .  .  .  52.1(8)  ?
  C142  C144'  H144'a  .  .  .  87.6(10)  ?
  C142  C144'  H144'b  .  .  .  143.1(13)  ?
  C142  C144'  H144'c  .  .  .  35.1(7)  ?
  C144  C144'  H142a  .  .  .  131.9(8)  ?
  C144  C144'  H142b  .  .  .  147.8(9)  ?
  C144  C144'  H144'a  .  .  .  90.5(9)  ?
  C144  C144'  H144'b  .  .  .  57.6(8)  ?
  C144  C144'  H144'c  .  .  .  161.8(10)  ?
  H142a  C144'  H142b  .  .  .  75.4(8)  ?
  H142a  C144'  H144'a  .  .  .  43.0(5)  ?
  H142a  C144'  H144'b  .  .  .  137.0(10)  ?
  H142a  C144'  H144'c  .  .  .  66.0(7)  ?
  H142b  C144'  H144'a  .  .  .  109.2(11)  ?
  H142b  C144'  H144'b  .  .  .  91.1(8)  ?
  H142b  C144'  H144'c  .  .  .  17.4(2)  ?
  H144'a  C144'  H144'b  .  .  .  110.0(11)  ?
  H144'a  C144'  H144'c  .  .  .  105.9(12)  ?
  H144'b  C144'  H144'c  .  .  .  108.0(10)  ?
  C14  C15  C16  .  .  .  121.7(4)  ?
  C14  C15  H15  .  .  .  119.2(4)  ?
  C16  C15  H15  .  .  .  119.1(4)  ?
  C11  C16  C15  .  .  .  120.4(3)  ?
  C11  C16  S2  .  .  .  121.2(3)  ?
  C15  C16  S2  .  .  .  118.2(3)  ?
  C12  S1  C42  .  .  .  103.87(18)  ?
  Na  O21  C21  .  .  .  132.7(2)  ?
  Na  O21  H21  .  .  .  116(3)  ?
  C21  O21  H21  .  .  .  107(3)  ?
  O21  C21  C22  .  .  .  122.3(3)  ?
  O21  C21  C26  .  .  .  119.6(3)  ?
  C22  C21  C26  .  .  .  118.2(3)  ?
  C21  C22  C23  .  .  .  120.0(3)  ?
  C21  C22  S2  .  .  .  119.7(3)  ?
  C23  C22  S2  .  .  .  120.2(3)  ?
  C22  C23  C24  .  .  .  122.3(3)  ?
  C22  C23  H23  .  .  .  118.5(3)  ?
  C24  C23  H23  .  .  .  119.2(3)  ?
  C23  C24  C241  .  .  .  120.8(3)  ?
  C23  C24  C25  .  .  .  117.1(4)  ?
  C241  C24  C25  .  .  .  122.2(3)  ?
  C24  C241  C242  .  .  .  109.0(4)  ?
  C24  C241  C243  .  .  .  112.2(4)  ?
  C24  C241  C244  .  .  .  109.9(4)  ?
  C242  C241  C243  .  .  .  107.2(5)  ?
  C242  C241  C244  .  .  .  112.6(5)  ?
  C243  C241  C244  .  .  .  105.9(4)  ?
  C241  C242  H242a  .  .  .  109.7(7)  ?
  C241  C242  H242b  .  .  .  109.5(7)  ?
  C241  C242  H242c  .  .  .  109.7(7)  ?
  H242a  C242  H242b  .  .  .  109.2(9)  ?
  H242a  C242  H242c  .  .  .  109.7(8)  ?
  H242b  C242  H242c  .  .  .  109.1(8)  ?
  C241  C243  H243a  .  .  .  109.6(6)  ?
  C241  C243  H243b  .  .  .  109.3(5)  ?
  C241  C243  H243c  .  .  .  108.5(6)  ?
  H243a  C243  H243b  .  .  .  111.1(7)  ?
  H243a  C243  H243c  .  .  .  109.2(6)  ?
  H243b  C243  H243c  .  .  .  109.2(7)  ?
  C241  C244  H244a  .  .  .  111.5(5)  ?
  C241  C244  H244b  .  .  .  110.9(5)  ?
  C241  C244  H244c  .  .  .  108.8(5)  ?
  H244a  C244  H244b  .  .  .  110.4(5)  ?
  H244a  C244  H244c  .  .  .  108.0(6)  ?
  H244b  C244  H244c  .  .  .  107.1(6)  ?
  C24  C25  C26  .  .  .  122.2(3)  ?
  C24  C25  H25  .  .  .  119.0(3)  ?
  C26  C25  H25  .  .  .  118.7(3)  ?
  C21  C26  C25  .  .  .  120.1(3)  ?
  C21  C26  S3  .  .  .  120.6(3)  ?
  C25  C26  S3  .  .  .  119.3(2)  ?
  C16  S2  C22  .  .  .  104.06(17)  ?
  Na  O31  C31  .  .  .  129.71(18)  ?
  Na  O31  H31  .  .  .  113(3)  ?
  C31  O31  H31  .  .  .  116(3)  ?
  O31  C31  C32  .  .  .  122.7(3)  ?
  O31  C31  C36  .  .  .  119.9(3)  ?
  C32  C31  C36  .  .  .  117.4(3)  ?
  C31  C32  C33  .  .  .  120.6(3)  ?
  C31  C32  S4  .  .  .  119.7(3)  ?
  C33  C32  S4  .  .  .  119.5(2)  ?
  C32  C33  C34  .  .  .  122.5(3)  ?
  C32  C33  H33  .  .  .  118.7(4)  ?
  C34  C33  H33  .  .  .  118.8(3)  ?
  C33  C34  C341  .  .  .  123.1(3)  ?
  C33  C34  C35  .  .  .  116.3(3)  ?
  C341  C34  C35  .  .  .  120.5(3)  ?
  C34  C341  C342  .  .  .  109.6(3)  ?
  C34  C341  C343  .  .  .  109.1(3)  ?
  C34  C341  C344  .  .  .  111.6(4)  ?
  C342  C341  C343  .  .  .  109.1(4)  ?
  C342  C341  C344  .  .  .  107.5(3)  ?
  C343  C341  C344  .  .  .  110.0(4)  ?
  C341  C342  H342a  .  .  .  108.7(4)  ?
  C341  C342  H342b  .  .  .  108.7(5)  ?
  C341  C342  H342c  .  .  .  110.3(4)  ?
  H342a  C342  H342b  .  .  .  108.1(5)  ?
  H342a  C342  H342c  .  .  .  110.6(6)  ?
  H342b  C342  H342c  .  .  .  110.4(5)  ?
  C341  C343  H343a  .  .  .  109.3(4)  ?
  C341  C343  H343b  .  .  .  109.4(4)  ?
  C341  C343  H343c  .  .  .  110.2(5)  ?
  H343a  C343  H343b  .  .  .  108.2(6)  ?
  H343a  C343  H343c  .  .  .  109.7(4)  ?
  H343b  C343  H343c  .  .  .  110.0(5)  ?
  C341  C344  H344a  .  .  .  108.0(5)  ?
  C341  C344  H344b  .  .  .  109.5(4)  ?
  C341  C344  H344c  .  .  .  108.9(4)  ?
  H344a  C344  H344b  .  .  .  110.9(5)  ?
  H344a  C344  H344c  .  .  .  109.1(5)  ?
  H344b  C344  H344c  .  .  .  110.4(6)  ?
  C34  C35  C36  .  .  .  122.5(3)  ?
  C34  C35  H35  .  .  .  118.8(3)  ?
  C36  C35  H35  .  .  .  118.7(3)  ?
  C31  C36  C35  .  .  .  120.7(3)  ?
  C31  C36  S3  .  .  .  120.4(2)  ?
  C35  C36  S3  .  .  .  118.9(3)  ?
  Na  S3  C26  .  .  .  99.43(12)  ?
  Na  S3  C36  .  .  .  97.19(12)  ?
  C26  S3  C36  .  .  .  100.66(14)  ?
  O41  C41  C42  .  .  .  121.5(3)  ?
  O41  C41  C46  .  .  .  122.3(3)  ?
  C42  C41  C46  .  .  .  116.3(3)  ?
  S1  C42  C41  .  .  .  119.6(2)  ?
  S1  C42  C43  .  .  .  119.0(2)  ?
  C41  C42  C43  .  .  .  121.3(3)  ?
  C42  C43  C44  .  .  .  122.4(3)  ?
  C42  C43  H43  .  .  .  118.8(4)  ?
  C44  C43  H43  .  .  .  118.7(3)  ?
  C43  C44  C441  .  .  .  121.3(3)  ?
  C43  C44  C45  .  .  .  116.3(3)  ?
  C441  C44  C45  .  .  .  122.4(3)  ?
  C44  C441  C442  .  .  .  117.5(4)  ?
  C44  C441  C443  .  .  .  110.8(4)  ?
  C44  C441  C444  .  .  .  111.7(4)  ?
  C44  C441  C442'  .  .  .  105.8(4)  ?
  C44  C441  C443'  .  .  .  111.0(5)  ?
  C44  C441  C444'  .  .  .  103.6(5)  ?
  C442  C441  C443  .  .  .  103.3(5)  ?
  C442  C441  C444  .  .  .  107.3(5)  ?
  C442  C441  C442'  .  .  .  53.2(5)  ?
  C442  C441  C443'  .  .  .  131.6(5)  ?
  C442  C441  C444'  .  .  .  56.3(5)  ?
  C443  C441  C444  .  .  .  105.4(5)  ?
  C443  C441  C442'  .  .  .  58.7(5)  ?
  C443  C441  C443'  .  .  .  58.8(6)  ?
  C443  C441  C444'  .  .  .  145.4(5)  ?
  C444  C441  C442'  .  .  .  142.5(5)  ?
  C444  C441  C443'  .  .  .  49.8(5)  ?
  C444  C441  C444'  .  .  .  62.6(5)  ?
  C442'  C441  C443'  .  .  .  115.0(6)  ?
  C442'  C441  C444'  .  .  .  109.6(6)  ?
  C443'  C441  C444'  .  .  .  111.2(6)  ?
  C441  C442  C442'  .  .  .  59.8(6)  ?
  C441  C442  C444'  .  .  .  61.9(5)  ?
  C441  C442  H442a  .  .  .  110.4(6)  ?
  C441  C442  H442b  .  .  .  109.8(7)  ?
  C441  C442  H442c  .  .  .  110.7(7)  ?
  C441  C442  H442'b  .  .  .  89.2(5)  ?
  C442'  C442  C444'  .  .  .  121.7(8)  ?
  C442'  C442  H442a  .  .  .  99.2(8)  ?
  C442'  C442  H442b  .  .  .  152.6(8)  ?
  C442'  C442  H442c  .  .  .  59.5(6)  ?
  C442'  C442  H442'b  .  .  .  41.8(5)  ?
  C444'  C442  H442a  .  .  .  101.9(7)  ?
  C444'  C442  H442b  .  .  .  54.2(6)  ?
  C444'  C442  H442c  .  .  .  148.4(8)  ?
  C444'  C442  H442'b  .  .  .  137.1(7)  ?
  H442a  C442  H442b  .  .  .  108.2(8)  ?
  H442a  C442  H442c  .  .  .  109.1(9)  ?
  H442a  C442  H442'b  .  .  .  118.4(9)  ?
  H442b  C442  H442c  .  .  .  108.6(7)  ?
  H442b  C442  H442'b  .  .  .  118.9(7)  ?
  H442c  C442  H442'b  .  .  .  21.5(2)  ?
  C441  C443  C442'  .  .  .  56.6(5)  ?
  C441  C443  C443'  .  .  .  57.4(5)  ?
  C441  C443  H443a  .  .  .  109.9(7)  ?
  C441  C443  H443b  .  .  .  109.0(6)  ?
  C441  C443  H443c  .  .  .  110.8(7)  ?
  C441  C443  H442'c  .  .  .  84.4(4)  ?
  C441  C443  H443'b  .  .  .  84.3(5)  ?
  C442'  C443  C443'  .  .  .  111.6(8)  ?
  C442'  C443  H443a  .  .  .  93.4(7)  ?
  C442'  C443  H443b  .  .  .  63.6(6)  ?
  C442'  C443  H443c  .  .  .  156.4(8)  ?
  C442'  C443  H442'c  .  .  .  38.1(4)  ?
  C442'  C443  H443'b  .  .  .  140.1(7)  ?
  C443'  C443  H443a  .  .  .  93.1(7)  ?
  C443'  C443  H443b  .  .  .  158.2(8)  ?
  C443'  C443  H443c  .  .  .  66.5(6)  ?
  C443'  C443  H442'c  .  .  .  140.7(6)  ?
  C443'  C443  H443'b  .  .  .  37.0(5)  ?
  H443a  C443  H443b  .  .  .  108.2(8)  ?
  H443a  C443  H443c  .  .  .  110.2(7)  ?
  H443a  C443  H442'c  .  .  .  109.4(7)  ?
  H443a  C443  H443'b  .  .  .  108.8(7)  ?
  H443b  C443  H443c  .  .  .  108.8(9)  ?
  H443b  C443  H442'c  .  .  .  26.4(2)  ?
  H443b  C443  H443'b  .  .  .  133.1(8)  ?
  H443c  C443  H442'c  .  .  .  128.7(8)  ?
  H443c  C443  H443'b  .  .  .  29.9(3)  ?
  H442'c  C443  H443'b  .  .  .  141.8(6)  ?
  C441  C444  C443'  .  .  .  63.3(6)  ?
  C441  C444  C444'  .  .  .  59.6(5)  ?
  C441  C444  H444a  .  .  .  110.0(7)  ?
  C441  C444  H444b  .  .  .  111.1(7)  ?
  C441  C444  H444c  .  .  .  109.8(6)  ?
  C441  C444  H443'c  .  .  .  100.0(6)  ?
  C443'  C444  C444'  .  .  .  121.3(8)  ?
  C443'  C444  H444a  .  .  .  92.0(8)  ?
  C443'  C444  H444b  .  .  .  60.9(7)  ?
  C443'  C444  H444c  .  .  .  159.9(9)  ?
  C443'  C444  H443'c  .  .  .  49.2(6)  ?
  C444'  C444  H444a  .  .  .  95.0(7)  ?
  C444'  C444  H444b  .  .  .  156.0(8)  ?
  C444'  C444  H444c  .  .  .  60.4(6)  ?
  C444'  C444  H443'c  .  .  .  152.7(7)  ?
  H444a  C444  H444b  .  .  .  108.9(7)  ?
  H444a  C444  H444c  .  .  .  108.0(8)  ?
  H444a  C444  H443'c  .  .  .  109.8(7)  ?
  H444b  C444  H444c  .  .  .  108.9(9)  ?
  H444b  C444  H443'c  .  .  .  12.18(13)  ?
  H444c  C444  H443'c  .  .  .  118.8(9)  ?
  C441  C442'  C442  .  .  .  67.0(6)  ?
  C441  C442'  C443  .  .  .  64.7(6)  ?
  C441  C442'  H442c  .  .  .  103.2(7)  ?
  C441  C442'  H443b  .  .  .  95.8(6)  ?
  C441  C442'  H442'a  .  .  .  108.9(8)  ?
  C441  C442'  H442'b  .  .  .  110.4(9)  ?
  C441  C442'  H442'c  .  .  .  110.5(9)  ?
  C442  C442'  C443  .  .  .  119.3(9)  ?
  C442  C442'  H442c  .  .  .  43.0(5)  ?
  C442  C442'  H443b  .  .  .  158.3(9)  ?
  C442  C442'  H442'a  .  .  .  80.8(8)  ?
  C442  C442'  H442'b  .  .  .  64.1(7)  ?
  C442  C442'  H442'c  .  .  .  170.9(9)  ?
  C443  C442'  H442c  .  .  .  162.0(9)  ?
  C443  C442'  H443b  .  .  .  39.0(4)  ?
  C443  C442'  H442'a  .  .  .  82.3(6)  ?
  C443  C442'  H442'b  .  .  .  169.1(10)  ?
  C443  C442'  H442'c  .  .  .  64.8(6)  ?
  H442c  C442'  H443b  .  .  .  158.6(9)  ?
  H442c  C442'  H442'a  .  .  .  90.0(8)  ?
  H442c  C442'  H442'b  .  .  .  24.6(3)  ?
  H442c  C442'  H442'c  .  .  .  133.2(10)  ?
  H443b  C442'  H442'a  .  .  .  93.3(7)  ?
  H443b  C442'  H442'b  .  .  .  137.0(10)  ?
  H443b  C442'  H442'c  .  .  .  26.8(3)  ?
  H442'a  C442'  H442'b  .  .  .  108.6(10)  ?
  H442'a  C442'  H442'c  .  .  .  108.0(9)  ?
  H442'b  C442'  H442'c  .  .  .  110.3(10)  ?
  C441  C443'  C443  .  .  .  63.8(5)  ?
  C441  C443'  C444  .  .  .  66.9(6)  ?
  C441  C443'  H443c  .  .  .  92.8(6)  ?
  C441  C443'  H444b  .  .  .  102.2(7)  ?
  C441  C443'  H443'a  .  .  .  111.6(9)  ?
  C441  C443'  H443'b  .  .  .  111.4(8)  ?
  C441  C443'  H443'c  .  .  .  107.6(8)  ?
  C443  C443'  C444  .  .  .  125.7(9)  ?
  C443  C443'  H443c  .  .  .  37.2(4)  ?
  C443  C443'  H444b  .  .  .  165.0(8)  ?
  C443  C443'  H443'a  .  .  .  89.2(9)  ?
  C443  C443'  H443'b  .  .  .  66.9(7)  ?
  C443  C443'  H443'c  .  .  .  163.6(9)  ?
  C444  C443'  H443c  .  .  .  159.7(8)  ?
  C444  C443'  H444b  .  .  .  45.5(6)  ?
  C444  C443'  H443'a  .  .  .  88.7(9)  ?
  C444  C443'  H443'b  .  .  .  156.8(12)  ?
  C444  C443'  H443'c  .  .  .  55.5(7)  ?
  H443c  C443'  H444b  .  .  .  146.7(9)  ?
  H443c  C443'  H443'a  .  .  .  99.9(9)  ?
  H443c  C443'  H443'b  .  .  .  30.2(4)  ?
  H443c  C443'  H443'c  .  .  .  136.3(9)  ?
  H444b  C443'  H443'a  .  .  .  101.7(9)  ?
  H444b  C443'  H443'b  .  .  .  116.9(10)  ?
  H444b  C443'  H443'c  .  .  .  10.45(14)  ?
  H443'a  C443'  H443'b  .  .  .  112.2(11)  ?
  H443'a  C443'  H443'c  .  .  .  107.2(9)  ?
  H443'b  C443'  H443'c  .  .  .  106.5(10)  ?
  C441  C444'  C442  .  .  .  61.7(6)  ?
  C441  C444'  C444  .  .  .  57.8(5)  ?
  C441  C444'  H442b  .  .  .  97.5(7)  ?
  C441  C444'  H444c  .  .  .  87.9(5)  ?
  C441  C444'  H444'a  .  .  .  111.3(9)  ?
  C441  C444'  H444'b  .  .  .  111.1(8)  ?
  C441  C444'  H444'c  .  .  .  111.4(8)  ?
  C442  C444'  C444  .  .  .  107.7(8)  ?
  C442  C444'  H442b  .  .  .  40.5(5)  ?
  C442  C444'  H444c  .  .  .  143.9(8)  ?
  C442  C444'  H444'a  .  .  .  79.5(8)  ?
  C442  C444'  H444'b  .  .  .  172.1(10)  ?
  C442  C444'  H444'c  .  .  .  73.6(7)  ?
  C444  C444'  H442b  .  .  .  147.8(10)  ?
  C444  C444'  H444c  .  .  .  36.3(4)  ?
  C444  C444'  H444'a  .  .  .  88.5(7)  ?
  C444  C444'  H444'b  .  .  .  68.9(6)  ?
  C444  C444'  H444'c  .  .  .  163.2(9)  ?
  H442b  C444'  H444c  .  .  .  174.6(9)  ?
  H442b  C444'  H444'a  .  .  .  81.8(7)  ?
  H442b  C444'  H444'b  .  .  .  143.3(10)  ?
  H442b  C444'  H444'c  .  .  .  38.0(4)  ?
  H444c  C444'  H444'a  .  .  .  95.7(7)  ?
  H444c  C444'  H444'b  .  .  .  33.1(3)  ?
  H444c  C444'  H444'c  .  .  .  140.0(11)  ?
  H444'a  C444'  H444'b  .  .  .  107.2(9)  ?
  H444'a  C444'  H444'c  .  .  .  108.0(9)  ?
  H444'b  C444'  H444'c  .  .  .  107.6(11)  ?
  C44  C45  C46  .  .  .  122.6(3)  ?
  C44  C45  H45  .  .  .  118.8(3)  ?
  C46  C45  H45  .  .  .  118.6(3)  ?
  C41  C46  C45  .  .  .  121.1(3)  ?
  C41  C46  S4  .  .  .  120.2(2)  ?
  C45  C46  S4  .  .  .  118.4(3)  ?
  C32  S4  C46  .  .  .  105.04(16)  ?
  Na  O101  C102  .  .  .  119.2(5)  ?
  Na  O101  C105  .  .  .  130.6(3)  ?
  C102  O101  C105  .  .  .  109.1(5)  ?
  O101  C102  C103  .  .  .  110.8(7)  ?
  O101  C102  H102a  .  .  .  113.8(8)  ?
  O101  C102  H102b  .  .  .  105.0(6)  ?
  C103  C102  H102a  .  .  .  113.3(8)  ?
  C103  C102  H102b  .  .  .  104.8(8)  ?
  H102a  C102  H102b  .  .  .  108.4(9)  ?
  C102  C103  C104  .  .  .  107.4(6)  ?
  C102  C103  H103a  .  .  .  108.0(7)  ?
  C102  C103  H103b  .  .  .  112.4(8)  ?
  C104  C103  H103a  .  .  .  110.2(7)  ?
  C104  C103  H103b  .  .  .  108.6(7)  ?
  H103a  C103  H103b  .  .  .  110.2(7)  ?
  C103  C104  C105  .  .  .  102.9(5)  ?
  C103  C104  H104a  .  .  .  111.5(5)  ?
  C103  C104  H104b  .  .  .  112.0(6)  ?
  C105  C104  H104a  .  .  .  110.7(6)  ?
  C105  C104  H104b  .  .  .  110.9(5)  ?
  H104a  C104  H104b  .  .  .  108.7(6)  ?
  O101  C105  C104  .  .  .  107.9(5)  ?
  O101  C105  H105a  .  .  .  111.9(6)  ?
  O101  C105  H105b  .  .  .  110.8(5)  ?
  C104  C105  H105a  .  .  .  109.5(5)  ?
  C104  C105  H105b  .  .  .  108.4(6)  ?
  H105a  C105  H105b  .  .  .  108.3(6)  ?
  Na  O201  C202  .  .  .  129.1(5)  ?
  Na  O201  C205  .  .  .  126.1(4)  ?
  Na  O201  C202'  .  .  .  107.4(4)  ?
  Na  O201  C205'  .  .  .  142.3(7)  ?
  C202  O201  C205  .  .  .  101.7(5)  ?
  C202  O201  C202'  .  .  .  39.7(7)  ?
  C202  O201  C205'  .  .  .  83.1(7)  ?
  C205  O201  C202'  .  .  .  124.7(5)  ?
  C205  O201  C205'  .  .  .  18.8(7)  ?
  C202'  O201  C205'  .  .  .  110.3(8)  ?
  O201  C202  C203  .  .  .  109.1(10)  ?
  O201  C202  C202'  .  .  .  74.0(9)  ?
  O201  C202  C203'  .  .  .  171(2)  ?
  O201  C202  C204'  .  .  .  106.9(8)  ?
  O201  C202  C205'  .  .  .  44.7(5)  ?
  O201  C202  H202a  .  .  .  103.7(9)  ?
  O201  C202  H202b  .  .  .  106.6(9)  ?
  O201  C202  H203'b  .  .  .  126.5(10)  ?
  C203  C202  C202'  .  .  .  161.0(17)  ?
  C203  C202  C203'  .  .  .  63.3(18)  ?
  C203  C202  C204'  .  .  .  18.7(10)  ?
  C203  C202  C205'  .  .  .  68.8(9)  ?
  C203  C202  H202a  .  .  .  119.6(13)  ?
  C203  C202  H202b  .  .  .  114.9(14)  ?
  C203  C202  H203'b  .  .  .  79.8(10)  ?
  C202'  C202  C203'  .  .  .  115(2)  ?
  C202'  C202  C204'  .  .  .  142.5(14)  ?
  C202'  C202  C205'  .  .  .  105.8(11)  ?
  C202'  C202  H202a  .  .  .  43.2(8)  ?
  C202'  C202  H202b  .  .  .  80.8(9)  ?
  C202'  C202  H203'b  .  .  .  114.0(10)  ?
  C203'  C202  C204'  .  .  .  67.6(16)  ?
  C203'  C202  C205'  .  .  .  130.2(18)  ?
  C203'  C202  H202a  .  .  .  84.9(19)  ?
  C203'  C202  H202b  .  .  .  74.0(14)  ?
  C203'  C202  H203'b  .  .  .  49.3(13)  ?
  C204'  C202  C205'  .  .  .  62.6(7)  ?
  C204'  C202  H202a  .  .  .  103.5(10)  ?
  C204'  C202  H202b  .  .  .  131.3(11)  ?
  C204'  C202  H203'b  .  .  .  95.8(8)  ?
  C205'  C202  H202a  .  .  .  108.1(10)  ?
  C205'  C202  H202b  .  .  .  142.5(12)  ?
  C205'  C202  H203'b  .  .  .  133.4(11)  ?
  H202a  C202  H202b  .  .  .  101.7(9)  ?
  H202a  C202  H203'b  .  .  .  117.3(8)  ?
  H202b  C202  H203'b  .  .  .  35.5(4)  ?
  C202  C203  C204  .  .  .  99.1(12)  ?
  C202  C203  C203'  .  .  .  32.7(8)  ?
  C202  C203  C204'  .  .  .  101(3)  ?
  C202  C203  C205'  .  .  .  67.8(9)  ?
  C202  C203  H203a  .  .  .  114.3(15)  ?
  C202  C203  H203b  .  .  .  127.5(18)  ?
  C202  C203  H204'a  .  .  .  99.8(15)  ?
  C202  C203  H204'b  .  .  .  173.2(17)  ?
  C204  C203  C203'  .  .  .  120.5(16)  ?
  C204  C203  C204'  .  .  .  35.1(19)  ?
  C204  C203  C205'  .  .  .  43.7(6)  ?
  C204  C203  H203a  .  .  .  98.8(13)  ?
  C204  C203  H203b  .  .  .  109.1(13)  ?
  C204  C203  H204'a  .  .  .  50.4(7)  ?
  C204  C203  H204'b  .  .  .  87.0(12)  ?
  C203'  C203  C204'  .  .  .  105(3)  ?
  C203'  C203  C205'  .  .  .  99.5(12)  ?
  C203'  C203  H203a  .  .  .  85.6(13)  ?
  C203'  C203  H203b  .  .  .  127(2)  ?
  C203'  C203  H204'a  .  .  .  94.8(15)  ?
  C203'  C203  H204'b  .  .  .  140.8(17)  ?
  C204'  C203  C205'  .  .  .  73(2)  ?
  C204'  C203  H203a  .  .  .  66(2)  ?
  C204'  C203  H203b  .  .  .  127(3)  ?
  C204'  C203  H204'a  .  .  .  15.3(18)  ?
  C204'  C203  H204'b  .  .  .  82(2)  ?
  C205'  C203  H203a  .  .  .  138.8(17)  ?
  C205'  C203  H203b  .  .  .  104.6(13)  ?
  C205'  C203  H204'a  .  .  .  86.5(10)  ?
  C205'  C203  H204'b  .  .  .  119.1(13)  ?
  H203a  C203  H203b  .  .  .  104.2(15)  ?
  H203a  C203  H204'a  .  .  .  52.3(9)  ?
  H203a  C203  H204'b  .  .  .  61.3(9)  ?
  H203b  C203  H204'a  .  .  .  132.4(14)  ?
  H203b  C203  H204'b  .  .  .  52.1(11)  ?
  H204'a  C203  H204'b  .  .  .  81.7(13)  ?
  C203  C204  C205  .  .  .  91.9(7)  ?
  C203  C204  C204'  .  .  .  12.7(8)  ?
  C203  C204  C205'  .  .  .  74.1(8)  ?
  C203  C204  H204a  .  .  .  114.4(10)  ?
  C203  C204  H204b  .  .  .  113.4(9)  ?
  C203  C204  H204'a  .  .  .  55.2(7)  ?
  C203  C204  H205'a  .  .  .  107.7(7)  ?
  C205  C204  C204'  .  .  .  102.5(7)  ?
  C205  C204  C205'  .  .  .  18.7(6)  ?
  C205  C204  H204a  .  .  .  113.6(8)  ?
  C205  C204  H204b  .  .  .  109.8(8)  ?
  C205  C204  H204'a  .  .  .  133.5(6)  ?
  C205  C204  H205'a  .  .  .  29.3(4)  ?
  C204'  C204  C205'  .  .  .  84.0(8)  ?
  C204'  C204  H204a  .  .  .  103.2(9)  ?
  C204'  C204  H204b  .  .  .  115.2(9)  ?
  C204'  C204  H204'a  .  .  .  42.5(5)  ?
  C204'  C204  H205'a  .  .  .  113.9(7)  ?
  C205'  C204  H204a  .  .  .  115.6(10)  ?
  C205'  C204  H204b  .  .  .  121.8(11)  ?
  C205'  C204  H204'a  .  .  .  116.0(8)  ?
  C205'  C204  H205'a  .  .  .  38.7(7)  ?
  H204a  C204  H204b  .  .  .  112.2(8)  ?
  H204a  C204  H204'a  .  .  .  64.7(5)  ?
  H204a  C204  H205'a  .  .  .  84.4(6)  ?
  H204b  C204  H204'a  .  .  .  113.2(7)  ?
  H204b  C204  H205'a  .  .  .  121.8(7)  ?
  H204'a  C204  H205'a  .  .  .  124.0(7)  ?
  O201  C205  C204  .  .  .  109.5(6)  ?
  O201  C205  C205'  .  .  .  55.1(16)  ?
  O201  C205  H205a  .  .  .  105.5(7)  ?
  O201  C205  H205b  .  .  .  104.8(7)  ?
  O201  C205  H205'a  .  .  .  98.9(8)  ?
  O201  C205  H205'b  .  .  .  94.8(6)  ?
  C204  C205  C205'  .  .  .  56.6(16)  ?
  C204  C205  H205a  .  .  .  105.9(8)  ?
  C204  C205  H205b  .  .  .  105.7(8)  ?
  C204  C205  H205'a  .  .  .  64.7(7)  ?
  C204  C205  H205'b  .  .  .  93.9(8)  ?
  C205'  C205  H205a  .  .  .  131(2)  ?
  C205'  C205  H205b  .  .  .  104(2)  ?
  C205'  C205  H205'a  .  .  .  89(2)  ?
  C205'  C205  H205'b  .  .  .  84(2)  ?
  H205a  C205  H205b  .  .  .  124.9(9)  ?
  H205a  C205  H205'a  .  .  .  46.7(5)  ?
  H205a  C205  H205'b  .  .  .  144.5(11)  ?
  H205b  C205  H205'a  .  .  .  156.3(10)  ?
  H205b  C205  H205'b  .  .  .  19.6(2)  ?
  H205'a  C205  H205'b  .  .  .  157.5(11)  ?
  O201  C202'  C202  .  .  .  66.3(9)  ?
  O201  C202'  C203'  .  .  .  93.0(10)  ?
  O201  C202'  H202a  .  .  .  115.6(12)  ?
  O201  C202'  H202b  .  .  .  88.3(7)  ?
  O201  C202'  H202'a  .  .  .  115.2(8)  ?
  O201  C202'  H202'b  .  .  .  114.7(8)  ?
  C202  C202'  C203'  .  .  .  26.7(10)  ?
  C202  C202'  H202a  .  .  .  69.8(12)  ?
  C202  C202'  H202b  .  .  .  48.4(8)  ?
  C202  C202'  H202'a  .  .  .  122.7(12)  ?
  C202  C202'  H202'b  .  .  .  131.9(13)  ?
  C203'  C202'  H202a  .  .  .  54.7(9)  ?
  C203'  C202'  H202b  .  .  .  43.8(6)  ?
  C203'  C202'  H202'a  .  .  .  113.2(10)  ?
  C203'  C202'  H202'b  .  .  .  120.7(10)  ?
  H202a  C202'  H202b  .  .  .  95.8(10)  ?
  H202a  C202'  H202'a  .  .  .  58.4(7)  ?
  H202a  C202'  H202'b  .  .  .  129.7(15)  ?
  H202b  C202'  H202'a  .  .  .  150.2(11)  ?
  H202b  C202'  H202'b  .  .  .  83.7(6)  ?
  H202'a  C202'  H202'b  .  .  .  101.0(11)  ?
  C202  C203'  C203  .  .  .  84(2)  ?
  C202  C203'  C202'  .  .  .  38.4(15)  ?
  C202  C203'  C204'  .  .  .  83.9(17)  ?
  C202  C203'  H202a  .  .  .  58.0(16)  ?
  C202  C203'  H202b  .  .  .  63.7(13)  ?
  C202  C203'  H203'a  .  .  .  141(3)  ?
  C202  C203'  H203'b  .  .  .  97.5(17)  ?
  C203  C203'  C202'  .  .  .  119.7(13)  ?
  C203  C203'  C204'  .  .  .  19.9(11)  ?
  C203  C203'  H202a  .  .  .  116.8(14)  ?
  C203  C203'  H202b  .  .  .  121.4(17)  ?
  C203  C203'  H203'a  .  .  .  127.5(14)  ?
  C203  C203'  H203'b  .  .  .  100.5(19)  ?
  C202'  C203'  C204'  .  .  .  112.5(10)  ?
  C202'  C203'  H202a  .  .  .  30.5(5)  ?
  C202'  C203'  H202b  .  .  .  58.5(8)  ?
  C202'  C203'  H203'a  .  .  .  103.4(16)  ?
  C202'  C203'  H203'b  .  .  .  102.7(11)  ?
  C204'  C203'  H202a  .  .  .  100.9(10)  ?
  C204'  C203'  H202b  .  .  .  136.1(15)  ?
  C204'  C203'  H203'a  .  .  .  117.9(11)  ?
  C204'  C203'  H203'b  .  .  .  120.4(18)  ?
  H202a  C203'  H202b  .  .  .  86.9(12)  ?
  H202a  C203'  H203'a  .  .  .  85.6(14)  ?
  H202a  C203'  H203'b  .  .  .  130.1(15)  ?
  H202b  C203'  H203'a  .  .  .  105.7(16)  ?
  H202b  C203'  H203'b  .  .  .  44.3(5)  ?
  H203'a  C203'  H203'b  .  .  .  97.3(11)  ?
  C202  C204'  C203  .  .  .  60(2)  ?
  C202  C204'  C204  .  .  .  109.4(10)  ?
  C202  C204'  C203'  .  .  .  28.4(6)  ?
  C202  C204'  C205'  .  .  .  66.8(7)  ?
  C202  C204'  H203a  .  .  .  106.9(8)  ?
  C202  C204'  H203b  .  .  .  92.3(8)  ?
  C202  C204'  H204'a  .  .  .  115.7(11)  ?
  C202  C204'  H204'b  .  .  .  125.1(9)  ?
  C203  C204'  C204  .  .  .  132(2)  ?
  C203  C204'  C203'  .  .  .  56(2)  ?
  C203  C204'  C205'  .  .  .  91(2)  ?
  C203  C204'  H203a  .  .  .  87(2)  ?
  C203  C204'  H203b  .  .  .  34(2)  ?
  C203  C204'  H204'a  .  .  .  157(3)  ?
  C203  C204'  H204'b  .  .  .  66(2)  ?
  C204  C204'  C203'  .  .  .  135.4(11)  ?
  C204  C204'  C205'  .  .  .  48.1(6)  ?
  C204  C204'  H203a  .  .  .  136.7(9)  ?
  C204  C204'  H203b  .  .  .  113.8(9)  ?
  C204  C204'  H204'a  .  .  .  70.9(7)  ?
  C204  C204'  H204'b  .  .  .  110.9(10)  ?
  C203'  C204'  C205'  .  .  .  95.2(8)  ?
  C203'  C204'  H203a  .  .  .  78.5(8)  ?
  C203'  C204'  H203b  .  .  .  89.4(8)  ?
  C203'  C204'  H204'a  .  .  .  108.6(11)  ?
  C203'  C204'  H204'b  .  .  .  110.2(10)  ?
  C205'  C204'  H203a  .  .  .  173.5(10)  ?
  C205'  C204'  H203b  .  .  .  94.0(8)  ?
  C205'  C204'  H204'a  .  .  .  108.8(9)  ?
  C205'  C204'  H204'b  .  .  .  120.7(11)  ?
  H203a  C204'  H203b  .  .  .  87.3(8)  ?
  H203a  C204'  H204'a  .  .  .  72.5(8)  ?
  H203a  C204'  H204'b  .  .  .  63.5(7)  ?
  H203b  C204'  H204'a  .  .  .  149.0(12)  ?
  H203b  C204'  H204'b  .  .  .  37.2(4)  ?
  H204'a  C204'  H204'b  .  .  .  111.9(11)  ?
  O201  C205'  C202  .  .  .  52.3(6)  ?
  O201  C205'  C203  .  .  .  92.3(8)  ?
  O201  C205'  C204  .  .  .  144.1(13)  ?
  O201  C205'  C205  .  .  .  106(2)  ?
  O201  C205'  C204'  .  .  .  102.6(9)  ?
  O201  C205'  H205a  .  .  .  98.5(10)  ?
  O201  C205'  H205b  .  .  .  106.8(10)  ?
  O201  C205'  H205'a  .  .  .  108.2(13)  ?
  O201  C205'  H205'b  .  .  .  105.9(11)  ?
  C202  C205'  C203  .  .  .  43.4(6)  ?
  C202  C205'  C204  .  .  .  94.2(9)  ?
  C202  C205'  C205  .  .  .  157(2)  ?
  C202  C205'  C204'  .  .  .  50.7(6)  ?
  C202  C205'  H205a  .  .  .  134.7(12)  ?
  C202  C205'  H205b  .  .  .  135.3(11)  ?
  C202  C205'  H205'a  .  .  .  119.0(14)  ?
  C202  C205'  H205'b  .  .  .  124.3(12)  ?
  C203  C205'  C204  .  .  .  62.3(8)  ?
  C203  C205'  C205  .  .  .  159(2)  ?
  C203  C205'  C204'  .  .  .  15.9(7)  ?
  C203  C205'  H205a  .  .  .  157.1(12)  ?
  C203  C205'  H205b  .  .  .  114.7(12)  ?
  C203  C205'  H205'a  .  .  .  127.8(14)  ?
  C203  C205'  H205'b  .  .  .  102.1(13)  ?
  C204  C205'  C205  .  .  .  104.7(18)  ?
  C204  C205'  C204'  .  .  .  47.8(6)  ?
  C204  C205'  H205a  .  .  .  98.4(9)  ?
  C204  C205'  H205b  .  .  .  106.9(11)  ?
  C204  C205'  H205'a  .  .  .  74.7(9)  ?
  C204  C205'  H205'b  .  .  .  104.1(12)  ?
  C205  C205'  C204'  .  .  .  151(2)  ?
  C205  C205'  H205a  .  .  .  31.1(16)  ?
  C205  C205'  H205b  .  .  .  50.4(18)  ?
  C205  C205'  H205'a  .  .  .  56.6(17)  ?
  C205  C205'  H205'b  .  .  .  63.3(19)  ?
  C204'  C205'  H205a  .  .  .  141.5(11)  ?
  C204'  C205'  H205b  .  .  .  121.5(12)  ?
  C204'  C205'  H205'a  .  .  .  112.4(12)  ?
  C204'  C205'  H205'b  .  .  .  110.0(12)  ?
  H205a  C205'  H205b  .  .  .  81.4(8)  ?
  H205a  C205'  H205'a  .  .  .  29.3(4)  ?
  H205a  C205'  H205'b  .  .  .  94.3(11)  ?
  H205b  C205'  H205'a  .  .  .  104.6(12)  ?
  H205b  C205'  H205'b  .  .  .  13.0(2)  ?
  H205'a  C205'  H205'b  .  .  .  116.5(14)  ?
  C302  O301  C305  .  .  .  100.4(5)  ?
  O301  C302  C303  .  .  .  109.2(6)  ?
  O301  C302  C303'  .  .  .  104.9(6)  ?
  O301  C302  H302a  .  .  .  111.0(7)  ?
  O301  C302  H302b  .  .  .  108.2(7)  ?
  C303  C302  C303'  .  .  .  49.3(7)  ?
  C303  C302  H302a  .  .  .  110.1(9)  ?
  C303  C302  H302b  .  .  .  109.1(8)  ?
  C303'  C302  H302a  .  .  .  143.5(9)  ?
  C303'  C302  H302b  .  .  .  64.0(6)  ?
  H302a  C302  H302b  .  .  .  109.2(7)  ?
  C302  C303  C304  .  .  .  104.5(9)  ?
  C302  C303  C303'  .  .  .  71.9(9)  ?
  C302  C303  C304'  .  .  .  89.6(8)  ?
  C302  C303  H303a  .  .  .  110.9(9)  ?
  C302  C303  H303b  .  .  .  109.8(11)  ?
  C302  C303  H303'a  .  .  .  111.7(10)  ?
  C304  C303  C303'  .  .  .  100.0(10)  ?
  C304  C303  C304'  .  .  .  52.9(7)  ?
  C304  C303  H303a  .  .  .  114.2(11)  ?
  C304  C303  H303b  .  .  .  110.3(9)  ?
  C304  C303  H303'a  .  .  .  116.0(9)  ?
  C303'  C303  C304'  .  .  .  47.4(7)  ?
  C303'  C303  H303a  .  .  .  142.8(12)  ?
  C303'  C303  H303b  .  .  .  43.8(7)  ?
  C303'  C303  H303'a  .  .  .  49.5(7)  ?
  C304'  C303  H303a  .  .  .  158.9(10)  ?
  C304'  C303  H303b  .  .  .  68.6(7)  ?
  C304'  C303  H303'a  .  .  .  76.1(7)  ?
  H303a  C303  H303b  .  .  .  107.2(10)  ?
  H303a  C303  H303'a  .  .  .  99.8(9)  ?
  H303b  C303  H303'a  .  .  .  7.58(11)  ?
  C303  C304  C305  .  .  .  103.7(9)  ?
  C303  C304  C304'  .  .  .  73.2(8)  ?
  C303  C304  H304a  .  .  .  109.2(10)  ?
  C303  C304  H304b  .  .  .  110.5(12)  ?
  C305  C304  C304'  .  .  .  62.4(8)  ?
  C305  C304  H304a  .  .  .  113.6(13)  ?
  C305  C304  H304b  .  .  .  114.2(11)  ?
  C304'  C304  H304a  .  .  .  175.9(14)  ?
  C304'  C304  H304b  .  .  .  76.2(9)  ?
  H304a  C304  H304b  .  .  .  105.7(12)  ?
  O301  C305  C304  .  .  .  110.3(7)  ?
  O301  C305  C304'  .  .  .  104.6(6)  ?
  O301  C305  H305a  .  .  .  110.1(5)  ?
  O301  C305  H305b  .  .  .  110.1(6)  ?
  C304  C305  C304'  .  .  .  67.0(9)  ?
  C304  C305  H305a  .  .  .  110.5(8)  ?
  C304  C305  H305b  .  .  .  110.6(8)  ?
  C304'  C305  H305a  .  .  .  143.1(7)  ?
  C304'  C305  H305b  .  .  .  49.7(6)  ?
  H305a  C305  H305b  .  .  .  105.1(6)  ?
  C302  C303'  C303  .  .  .  58.8(8)  ?
  C302  C303'  C304'  .  .  .  105.2(9)  ?
  C302  C303'  H302b  .  .  .  38.0(4)  ?
  C302  C303'  H303b  .  .  .  105.5(12)  ?
  C302  C303'  H303'a  .  .  .  109.9(11)  ?
  C302  C303'  H303'b  .  .  .  114.0(9)  ?
  C303  C303'  C304'  .  .  .  91.3(10)  ?
  C303  C303'  H302b  .  .  .  93.8(9)  ?
  C303  C303'  H303b  .  .  .  52.5(9)  ?
  C303  C303'  H303'a  .  .  .  61.0(9)  ?
  C303  C303'  H303'b  .  .  .  153.8(13)  ?
  C304'  C303'  H302b  .  .  .  122.5(9)  ?
  C304'  C303'  H303b  .  .  .  101.9(10)  ?
  C304'  C303'  H303'a  .  .  .  108.8(9)  ?
  C304'  C303'  H303'b  .  .  .  114.6(13)  ?
  H302b  C303'  H303b  .  .  .  125.7(12)  ?
  H302b  C303'  H303'a  .  .  .  123.4(10)  ?
  H302b  C303'  H303'b  .  .  .  76.0(6)  ?
  H303b  C303'  H303'a  .  .  .  10.23(16)  ?
  H303b  C303'  H303'b  .  .  .  114.4(11)  ?
  H303'a  C303'  H303'b  .  .  .  104.3(10)  ?
  C303  C304'  C304  .  .  .  53.9(7)  ?
  C303  C304'  C305  .  .  .  84.3(7)  ?
  C303  C304'  C303'  .  .  .  41.3(8)  ?
  C303  C304'  H305b  .  .  .  122.9(9)  ?
  C303  C304'  H304'a  .  .  .  95.8(11)  ?
  C303  C304'  H304'b  .  .  .  148.4(10)  ?
  C304  C304'  C305  .  .  .  50.7(7)  ?
  C304  C304'  C303'  .  .  .  95.0(11)  ?
  C304  C304'  H305b  .  .  .  87.2(9)  ?
  C304  C304'  H304'a  .  .  .  75.5(10)  ?
  C304  C304'  H304'b  .  .  .  155.4(11)  ?
  C305  C304'  C303'  .  .  .  110.1(9)  ?
  C305  C304'  H305b  .  .  .  40.5(4)  ?
  C305  C304'  H304'a  .  .  .  112.1(10)  ?
  C305  C304'  H304'b  .  .  .  110.3(10)  ?
  C303'  C304'  H305b  .  .  .  131.1(10)  ?
  C303'  C304'  H304'a  .  .  .  113.0(11)  ?
  C303'  C304'  H304'b  .  .  .  107.4(11)  ?
  H305b  C304'  H304'a  .  .  .  114.8(10)  ?
  H305b  C304'  H304'b  .  .  .  70.7(8)  ?
  H304'a  C304'  H304'b  .  .  .  103.6(11)  ?
  C402  O401  C405  .  .  .  108.8(9)  ?
  C402  O401  O401'  .  .  .  73.7(12)  ?
  C402  O401  C402'  .  .  .  34.2(14)  ?
  C402  O401  C403'  .  .  .  40.9(10)  ?
  C402  O401  H403'a  .  .  .  73.2(11)  ?
  C405  O401  O401'  .  .  .  68.7(8)  ?
  C405  O401  C402'  .  .  .  111.4(11)  ?
  C405  O401  C403'  .  .  .  80.3(8)  ?
  C405  O401  H403'a  .  .  .  84.2(8)  ?
  O401'  O401  C402'  .  .  .  50.0(9)  ?
  O401'  O401  C403'  .  .  .  89.1(6)  ?
  O401'  O401  H403'a  .  .  .  126.7(5)  ?
  C402'  O401  C403'  .  .  .  71.8(11)  ?
  C402'  O401  H403'a  .  .  .  107.4(11)  ?
  C403'  O401  H403'a  .  .  .  40.2(5)  ?
  O401  C402  C403  .  .  .  109.0(11)  ?
  O401  C402  C402'  .  .  .  47.9(15)  ?
  O401  C402  C403'  .  .  .  68.7(12)  ?
  O401  C402  H402a  .  .  .  105.6(15)  ?
  O401  C402  H402b  .  .  .  114(2)  ?
  O401  C402  H402'a  .  .  .  72.5(10)  ?
  O401  C402  H402'b  .  .  .  79.2(8)  ?
  O401  C402  H403'b  .  .  .  117.7(17)  ?
  C403  C402  C402'  .  .  .  109(2)  ?
  C403  C402  C403'  .  .  .  63.5(11)  ?
  C403  C402  H402a  .  .  .  104.9(18)  ?
  C403  C402  H402b  .  .  .  112.4(15)  ?
  C403  C402  H402'a  .  .  .  82.1(13)  ?
  C403  C402  H402'b  .  .  .  149(2)  ?
  C403  C402  H403'b  .  .  .  66.1(8)  ?
  C402'  C402  C403'  .  .  .  110.2(19)  ?
  C402'  C402  H402a  .  .  .  59.1(18)  ?
  C402'  C402  H402b  .  .  .  139(2)  ?
  C402'  C402  H402'a  .  .  .  31.8(16)  ?
  C402'  C402  H402'b  .  .  .  53.6(11)  ?
  C402'  C402  H403'b  .  .  .  164(2)  ?
  C403'  C402  H402a  .  .  .  162(3)  ?
  C403'  C402  H402b  .  .  .  86(2)  ?
  C403'  C402  H402'a  .  .  .  113.7(16)  ?
  C403'  C402  H402'b  .  .  .  142.9(18)  ?
  C403'  C402  H403'b  .  .  .  53.5(12)  ?
  H402a  C402  H402b  .  .  .  110.8(14)  ?
  H402a  C402  H402'a  .  .  .  49.5(11)  ?
  H402a  C402  H402'b  .  .  .  44.6(7)  ?
  H402a  C402  H403'b  .  .  .  136.5(13)  ?
  H402b  C402  H402'a  .  .  .  159.4(16)  ?
  H402b  C402  H402'b  .  .  .  90.0(13)  ?
  H402b  C402  H403'b  .  .  .  48.3(10)  ?
  H402'a  C402  H402'b  .  .  .  71.4(11)  ?
  H402'a  C402  H403'b  .  .  .  148.2(14)  ?
  H402'b  C402  H403'b  .  .  .  138.1(18)  ?
  C402  C403  C404  .  .  .  106.8(9)  ?
  C402  C403  C402'  .  .  .  23.6(10)  ?
  C402  C403  C403'  .  .  .  40.0(10)  ?
  C402  C403  C405'  .  .  .  99.1(9)  ?
  C402  C403  H403a  .  .  .  96.6(12)  ?
  C402  C403  H403b  .  .  .  125.9(15)  ?
  C402  C403  H403'b  .  .  .  49.1(10)  ?
  C402  C403  H404'a  .  .  .  151.9(11)  ?
  C402  C403  H404'b  .  .  .  151.9(11)  ?
  C404  C403  C402'  .  .  .  94.9(7)  ?
  C404  C403  C403'  .  .  .  76.2(8)  ?
  C404  C403  C405'  .  .  .  40.9(6)  ?
  C404  C403  H403a  .  .  .  114.1(13)  ?
  C404  C403  H403b  .  .  .  106.7(10)  ?
  C404  C403  H403'b  .  .  .  109.4(9)  ?
  C404  C403  H404'a  .  .  .  47.5(5)  ?
  C404  C403  H404'b  .  .  .  47.5(5)  ?
  C402'  C403  C403'  .  .  .  50.2(8)  ?
  C402'  C403  C405'  .  .  .  77.1(6)  ?
  C402'  C403  H403a  .  .  .  120.2(10)  ?
  C402'  C403  H403b  .  .  .  113.3(11)  ?
  C402'  C403  H403'b  .  .  .  71.9(6)  ?
  C402'  C403  H404'a  .  .  .  141.9(8)  ?
  C402'  C403  H404'b  .  .  .  141.9(8)  ?
  C403'  C403  C405'  .  .  .  92.6(7)  ?
  C403'  C403  H403a  .  .  .  86.1(10)  ?
  C403'  C403  H403b  .  .  .  163.4(13)  ?
  C403'  C403  H403'b  .  .  .  41.6(5)  ?
  C403'  C403  H404'a  .  .  .  113.1(11)  ?
  C403'  C403  H404'b  .  .  .  113.0(11)  ?
  C405'  C403  H403a  .  .  .  153.8(11)  ?
  C405'  C403  H403b  .  .  .  80.4(7)  ?
  C405'  C403  H403'b  .  .  .  134.2(6)  ?
  C405'  C403  H404'a  .  .  .  69.3(5)  ?
  C405'  C403  H404'b  .  .  .  69.3(5)  ?
  H403a  C403  H403b  .  .  .  106.7(8)  ?
  H403a  C403  H403'b  .  .  .  49.8(6)  ?
  H403a  C403  H404'a  .  .  .  87.2(9)  ?
  H403a  C403  H404'b  .  .  .  87.2(9)  ?
  H403b  C403  H403'b  .  .  .  142.9(9)  ?
  H403b  C403  H404'a  .  .  .  78.7(7)  ?
  H403b  C403  H404'b  .  .  .  78.7(7)  ?
  H403'b  C403  H404'a  .  .  .  121.1(10)  ?
  H403'b  C403  H404'b  .  .  .  121.1(10)  ?
  H404'a  C403  H404'b  .  .  .  .00000  ?
  C403  C404  C405  .  .  .  106.9(7)  ?
  C403  C404  C403'  .  .  .  53.2(7)  ?
  C403  C404  C405'  .  .  .  95.2(9)  ?
  C403  C404  H404a  .  .  .  104.3(9)  ?
  C403  C404  H404b  .  .  .  110.4(9)  ?
  C403  C404  H404'a  .  .  .  64.6(6)  ?
  C403  C404  H404'b  .  .  .  64.6(6)  ?
  C405  C404  C403'  .  .  .  66.0(7)  ?
  C405  C404  C405'  .  .  .  69.4(8)  ?
  C405  C404  H404a  .  .  .  113.1(9)  ?
  C405  C404  H404b  .  .  .  115.5(9)  ?
  C405  C404  H404'a  .  .  .  171.4(7)  ?
  C405  C404  H404'b  .  .  .  171.4(7)  ?
  C403'  C404  C405'  .  .  .  109.6(7)  ?
  C403'  C404  H404a  .  .  .  90.4(7)  ?
  C403'  C404  H404b  .  .  .  160.1(8)  ?
  C403'  C404  H404'a  .  .  .  107.5(7)  ?
  C403'  C404  H404'b  .  .  .  107.5(7)  ?
  C405'  C404  H404a  .  .  .  158.0(7)  ?
  C405'  C404  H404b  .  .  .  56.7(6)  ?
  C405'  C404  H404'a  .  .  .  109.2(8)  ?
  C405'  C404  H404'b  .  .  .  109.2(8)  ?
  H404a  C404  H404b  .  .  .  106.0(5)  ?
  H404a  C404  H404'a  .  .  .  71.4(5)  ?
  H404a  C404  H404'b  .  .  .  71.4(5)  ?
  H404b  C404  H404'a  .  .  .  68.6(5)  ?
  H404b  C404  H404'b  .  .  .  68.6(5)  ?
  H404'a  C404  H404'b  .  .  .  .00000  ?
  O401  C405  C404  .  .  .  106.4(8)  ?
  O401  C405  O401'  .  .  .  71.0(8)  ?
  O401  C405  C402'  .  .  .  29.8(7)  ?
  O401  C405  C403'  .  .  .  51.3(7)  ?
  O401  C405  C405'  .  .  .  110.6(10)  ?
  O401  C405  H405a  .  .  .  110.5(12)  ?
  O401  C405  H405b  .  .  .  112.5(13)  ?
  C404  C405  O401'  .  .  .  77.0(7)  ?
  C404  C405  C402'  .  .  .  84.0(7)  ?
  C404  C405  C403'  .  .  .  59.2(6)  ?
  C404  C405  C405'  .  .  .  45.6(6)  ?
  C404  C405  H405a  .  .  .  109.8(11)  ?
  C404  C405  H405b  .  .  .  109.3(11)  ?
  O401'  C405  C402'  .  .  .  45.5(6)  ?
  O401'  C405  C403'  .  .  .  80.4(7)  ?
  O401'  C405  C405'  .  .  .  44.8(5)  ?
  O401'  C405  H405a  .  .  .  171.6(11)  ?
  O401'  C405  H405b  .  .  .  64.0(9)  ?
  C402'  C405  C403'  .  .  .  45.6(7)  ?
  C402'  C405  C405'  .  .  .  80.9(8)  ?
  C402'  C405  H405a  .  .  .  138.2(12)  ?
  C402'  C405  H405b  .  .  .  103.1(12)  ?
  C403'  C405  C405'  .  .  .  89.1(6)  ?
  C403'  C405  H405a  .  .  .  107.1(12)  ?
  C403'  C405  H405b  .  .  .  144.4(13)  ?
  C405'  C405  H405a  .  .  .  137.1(11)  ?
  C405'  C405  H405b  .  .  .  65.9(8)  ?
  H405a  C405  H405b  .  .  .  108.4(10)  ?
  O401  O401'  C405  .  .  .  40.3(5)  ?
  O401  O401'  C402'  .  .  .  32.4(7)  ?
  O401  O401'  C405'  .  .  .  92.5(6)  ?
  O401  O401'  H402'a  .  .  .  60.5(5)  ?
  C405  O401'  C402'  .  .  .  69.2(7)  ?
  C405  O401'  C405'  .  .  .  56.1(6)  ?
  C405  O401'  H402'a  .  .  .  97.8(7)  ?
  C402'  O401'  C405'  .  .  .  109.1(7)  ?
  C402'  O401'  H402'a  .  .  .  28.7(6)  ?
  C405'  O401'  H402'a  .  .  .  126.6(9)  ?
  O401  C402'  C402  .  .  .  98(2)  ?
  O401  C402'  C403  .  .  .  101.9(9)  ?
  O401  C402'  C405  .  .  .  38.9(7)  ?
  O401  C402'  O401'  .  .  .  97.6(12)  ?
  O401  C402'  C403'  .  .  .  64.8(10)  ?
  O401  C402'  H402a  .  .  .  162.5(17)  ?
  O401  C402'  H402'a  .  .  .  121.3(17)  ?
  O401  C402'  H402'b  .  .  .  110.9(15)  ?
  C402  C402'  C403  .  .  .  47.7(16)  ?
  C402  C402'  C405  .  .  .  97.6(15)  ?
  C402  C402'  O401'  .  .  .  124(2)  ?
  C402  C402'  C403'  .  .  .  38.9(14)  ?
  C402  C402'  H402a  .  .  .  73(2)  ?
  C402  C402'  H402'a  .  .  .  120(3)  ?
  C402  C402'  H402'b  .  .  .  86.4(17)  ?
  C403  C402'  C405  .  .  .  73.7(5)  ?
  C403  C402'  O401'  .  .  .  76.1(7)  ?
  C403  C402'  C403'  .  .  .  45.7(7)  ?
  C403  C402'  H402a  .  .  .  83.5(13)  ?
  C403  C402'  H402'a  .  .  .  79.4(11)  ?
  C403  C402'  H402'b  .  .  .  126.9(16)  ?
  C405  C402'  O401'  .  .  .  65.3(7)  ?
  C405  C402'  C403'  .  .  .  59.2(7)  ?
  C405  C402'  H402a  .  .  .  155.1(13)  ?
  C405  C402'  H402'a  .  .  .  89.8(9)  ?
  C405  C402'  H402'b  .  .  .  149.7(16)  ?
  O401'  C402'  C403'  .  .  .  106.4(7)  ?
  O401'  C402'  H402a  .  .  .  100.0(13)  ?
  O401'  C402'  H402'a  .  .  .  24.7(5)  ?
  O401'  C402'  H402'b  .  .  .  135.6(13)  ?
  C403'  C402'  H402a  .  .  .  110.8(17)  ?
  C403'  C402'  H402'a  .  .  .  120.8(11)  ?
  C403'  C402'  H402'b  .  .  .  116.3(14)  ?
  H402a  C402'  H402'a  .  .  .  76.0(13)  ?
  H402a  C402'  H402'b  .  .  .  54.5(6)  ?
  H402'a  C402'  H402'b  .  .  .  114.0(13)  ?
  O401  C403'  C402  .  .  .  70.5(12)  ?
  O401  C403'  C403  .  .  .  117.2(10)  ?
  O401  C403'  C404  .  .  .  99.6(7)  ?
  O401  C403'  C405  .  .  .  48.4(6)  ?
  O401  C403'  C402'  .  .  .  43.3(9)  ?
  O401  C403'  H402b  .  .  .  93.6(8)  ?
  O401  C403'  H403'a  .  .  .  73.4(9)  ?
  O401  C403'  H403'b  .  .  .  138.9(11)  ?
  C402  C403'  C403  .  .  .  76.5(14)  ?
  C402  C403'  C404  .  .  .  114.7(16)  ?
  C402  C403'  C405  .  .  .  105.7(15)  ?
  C402  C403'  C402'  .  .  .  30.9(13)  ?
  C402  C403'  H402b  .  .  .  44.4(14)  ?
  C402  C403'  H403'a  .  .  .  121.5(16)  ?
  C402  C403'  H403'b  .  .  .  76.2(13)  ?
  C403  C403'  C404  .  .  .  50.6(6)  ?
  C403  C403'  C405  .  .  .  95.5(7)  ?
  C403  C403'  C402'  .  .  .  84.2(11)  ?
  C403  C403'  H402b  .  .  .  98.2(9)  ?
  C403  C403'  H403'a  .  .  .  162.1(14)  ?
  C403  C403'  H403'b  .  .  .  76.1(8)  ?
  C404  C403'  C405  .  .  .  54.8(6)  ?
  C404  C403'  C402'  .  .  .  100.4(8)  ?
  C404  C403'  H402b  .  .  .  148.8(9)  ?
  C404  C403'  H403'a  .  .  .  115.5(10)  ?
  C404  C403'  H403'b  .  .  .  116.1(9)  ?
  C405  C403'  C402'  .  .  .  75.3(9)  ?
  C405  C403'  H402b  .  .  .  141.4(10)  ?
  C405  C403'  H403'a  .  .  .  80.9(9)  ?
  C405  C403'  H403'b  .  .  .  170.8(9)  ?
  C402'  C403'  H402b  .  .  .  70.6(8)  ?
  C402'  C403'  H403'a  .  .  .  111.5(12)  ?
  C402'  C403'  H403'b  .  .  .  107.1(12)  ?
  H402b  C403'  H403'a  .  .  .  95.3(6)  ?
  H402b  C403'  H403'b  .  .  .  45.3(4)  ?
  H403'a  C403'  H403'b  .  .  .  105.9(8)  ?
  C403  C405'  C404  .  .  .  43.9(6)  ?
  C403  C405'  C405  .  .  .  82.5(6)  ?
  C403  C405'  O401'  .  .  .  79.2(6)  ?
  C403  C405'  H404b  .  .  .  73.9(6)  ?
  C403  C405'  H405b  .  .  .  115.6(5)  ?
  C403  C405'  H405'a  .  .  .  144.0(8)  ?
  C403  C405'  H405'b  .  .  .  96.3(7)  ?
  C404  C405'  C405  .  .  .  64.9(7)  ?
  C404  C405'  O401'  .  .  .  113.5(6)  ?
  C404  C405'  H404b  .  .  .  49.5(5)  ?
  C404  C405'  H405b  .  .  .  99.3(6)  ?
  C404  C405'  H405'a  .  .  .  102.9(8)  ?
  C404  C405'  H405'b  .  .  .  106.8(8)  ?
  C405  C405'  O401'  .  .  .  79.0(7)  ?
  C405  C405'  H404b  .  .  .  105.9(8)  ?
  C405  C405'  H405b  .  .  .  36.1(5)  ?
  C405  C405'  H405'a  .  .  .  67.7(6)  ?
  C405  C405'  H405'b  .  .  .  169.0(9)  ?
  O401'  C405'  H404b  .  .  .  151.6(8)  ?
  O401'  C405'  H405b  .  .  .  73.3(5)  ?
  O401'  C405'  H405'a  .  .  .  112.6(8)  ?
  O401'  C405'  H405'b  .  .  .  111.5(8)  ?
  H404b  C405'  H405b  .  .  .  127.0(7)  ?
  H404b  C405'  H405'a  .  .  .  94.7(7)  ?
  H404b  C405'  H405'b  .  .  .  63.5(5)  ?
  H405b  C405'  H405'a  .  .  .  45.4(4)  ?
  H405b  C405'  H405'b  .  .  .  147.8(7)  ?
  H405'a  C405'  H405'b  .  .  .  109.1(6)  ?
  Na  O01  O01'  .  .  .  78.9(6)  ?
  Na  O01'  O01  .  .  .  74.3(6)  ?
  C142  H142a  C144'  .  .  .  47.2(7)  ?
  C142  H142a  H144'a  .  .  .  92.0(5)  ?
  C144'  H142a  H144'a  .  .  .  45.4(5)  ?
  C142  H142b  C144'  .  .  .  54.0(8)  ?
  C142  H142b  H144'c  .  .  .  9.2(4)  ?
  C144'  H142b  H144'c  .  .  .  50.9(6)  ?
  C143  H143b  C142'  .  .  .  98.3(13)  ?
  C143  H143b  H142'c  .  .  .  159.7(4)  ?
  C142'  H143b  H142'c  .  .  .  82.2(12)  ?
  C143  H143c  C143'  .  .  .  80.2(10)  ?
  C143  H143c  H143'b  .  .  .  162.1(4)  ?
  C143'  H143c  H143'b  .  .  .  85.8(8)  ?
  C144  H144c  H144'b  .  .  .  89.3(6)  ?
  C143  H142'c  C142'  .  .  .  57.5(10)  ?
  C143  H142'c  H143b  .  .  .  12.7(3)  ?
  C142'  H142'c  H143b  .  .  .  56.0(10)  ?
  C143  H143'b  C143'  .  .  .  64.3(9)  ?
  C143  H143'b  H143c  .  .  .  13.7(3)  ?
  C143'  H143'b  H143c  .  .  .  74.8(8)  ?
  C142  H144'a  C144'  .  .  .  47.2(9)  ?
  C142  H144'a  H142a  .  .  .  45.1(3)  ?
  C144'  H144'a  H142a  .  .  .  91.7(8)  ?
  C144  H144'b  C144'  .  .  .  86.3(8)  ?
  C144  H144'b  H144c  .  .  .  43.6(4)  ?
  C144'  H144'b  H144c  .  .  .  129.3(8)  ?
  C142  H144'c  C144'  .  .  .  73.1(11)  ?
  C142  H144'c  H142b  .  .  .  164.9(7)  ?
  C144'  H144'c  H142b  .  .  .  111.7(6)  ?
  C442  H442b  C444'  .  .  .  85.3(7)  ?
  C442  H442b  H444'c  .  .  .  125.6(5)  ?
  C444'  H442b  H444'c  .  .  .  52.8(5)  ?
  C442  H442c  C442'  .  .  .  77.5(7)  ?
  C442  H442c  H442'b  .  .  .  116.5(5)  ?
  C442'  H442c  H442'b  .  .  .  48.8(4)  ?
  C443  H443b  C442'  .  .  .  77.5(6)  ?
  C443  H443b  H442'c  .  .  .  114.4(5)  ?
  C442'  H443b  H442'c  .  .  .  38.9(4)  ?
  C443  H443c  C443'  .  .  .  76.3(7)  ?
  C443  H443c  H443'b  .  .  .  112.9(5)  ?
  C443'  H443c  H443'b  .  .  .  37.4(4)  ?
  C444  H444b  C443'  .  .  .  73.6(7)  ?
  C444  H444b  H443'c  .  .  .  116.3(5)  ?
  C443'  H444b  H443'c  .  .  .  45.0(5)  ?
  C444  H444c  C444'  .  .  .  83.4(7)  ?
  C444  H444c  H444'b  .  .  .  123.6(5)  ?
  C444'  H444c  H444'b  .  .  .  41.4(4)  ?
  C442  H442'b  C442'  .  .  .  74.1(7)  ?
  C442  H442'b  H442c  .  .  .  42.0(4)  ?
  C442'  H442'b  H442c  .  .  .  106.6(6)  ?
  C443  H442'c  C442'  .  .  .  77.1(7)  ?
  C443  H442'c  H443b  .  .  .  39.2(4)  ?
  C442'  H442'c  H443b  .  .  .  114.3(5)  ?
  C443  H443'b  C443'  .  .  .  76.1(7)  ?
  C443  H443'b  H443c  .  .  .  37.2(3)  ?
  C443'  H443'b  H443c  .  .  .  112.4(7)  ?
  C444  H443'c  C443'  .  .  .  75.3(8)  ?
  C444  H443'c  H444b  .  .  .  51.5(5)  ?
  C443'  H443'c  H444b  .  .  .  124.5(6)  ?
  C444'  H444'b  H444c  .  .  .  105.6(6)  ?
  C444'  H444'c  H442b  .  .  .  89.3(7)  ?
  C202  H202a  C202'  .  .  .  67.0(11)  ?
  C202  H202a  C203'  .  .  .  37.1(9)  ?
  C202  H202a  H202'a  .  .  .  134.9(5)  ?
  C202'  H202a  C203'  .  .  .  94.7(11)  ?
  C202'  H202a  H202'a  .  .  .  75.4(9)  ?
  C203'  H202a  H202'a  .  .  .  170.2(6)  ?
  C202  H202b  C202'  .  .  .  50.8(9)  ?
  C202  H202b  C203'  .  .  .  42.3(9)  ?
  C202  H202b  H203'b  .  .  .  97.4(7)  ?
  C202'  H202b  C203'  .  .  .  77.7(9)  ?
  C202'  H202b  H203'b  .  .  .  143.1(5)  ?
  C203'  H202b  H203'b  .  .  .  65.5(8)  ?
  C203  H203a  C204'  .  .  .  27.4(11)  ?
  C203  H203b  C204'  .  .  .  18.7(11)  ?
  C203  H203b  H204'b  .  .  .  61.2(10)  ?
  C204'  H203b  H204'b  .  .  .  46.8(5)  ?
  C205  H205a  C205'  .  .  .  17.5(9)  ?
  C205  H205a  H205'a  .  .  .  57.1(6)  ?
  C205'  H205a  H205'a  .  .  .  42.7(6)  ?
  C205  H205b  C205'  .  .  .  25.9(9)  ?
  C205  H205b  H205'b  .  .  .  70.4(5)  ?
  C205'  H205b  H205'b  .  .  .  44.6(7)  ?
  C202'  H202'a  H202a  .  .  .  46.1(6)  ?
  C202  H203'b  C203'  .  .  .  33.3(8)  ?
  C202  H203'b  H202b  .  .  .  47.0(4)  ?
  C203'  H203'b  H202b  .  .  .  70.3(9)  ?
  C203  H204'a  C204  .  .  .  74.5(7)  ?
  C203  H204'a  C204'  .  .  .  7.9(9)  ?
  C204  H204'a  C204'  .  .  .  66.6(7)  ?
  C203  H204'b  C204'  .  .  .  32.7(15)  ?
  C203  H204'b  H203b  .  .  .  66.6(14)  ?
  C204'  H204'b  H203b  .  .  .  96.0(6)  ?
  C204  H205'a  C205  .  .  .  85.9(7)  ?
  C204  H205'a  C205'  .  .  .  66.6(9)  ?
  C204  H205'a  H205a  .  .  .  144.9(4)  ?
  C205  H205'a  C205'  .  .  .  34.3(11)  ?
  C205  H205'a  H205a  .  .  .  76.2(6)  ?
  C205'  H205'a  H205a  .  .  .  108.0(9)  ?
  C205  H205'b  C205'  .  .  .  32.6(10)  ?
  C205  H205'b  H205b  .  .  .  90.0(5)  ?
  C205'  H205'b  H205b  .  .  .  122.5(8)  ?
  C302  H302b  C303'  .  .  .  78.0(7)  ?
  C303  H303b  C303'  .  .  .  83.6(11)  ?
  C303  H303b  H303'a  .  .  .  136.0(6)  ?
  C303'  H303b  H303'a  .  .  .  125.5(7)  ?
  C305  H305b  C304'  .  .  .  89.9(8)  ?
  C303  H303'a  C303'  .  .  .  69.4(9)  ?
  C303  H303'a  H303b  .  .  .  36.4(5)  ?
  C303'  H303'a  H303b  .  .  .  44.3(6)  ?
  C402  H402a  C402'  .  .  .  47.7(13)  ?
  C402  H402a  H402'b  .  .  .  80.2(9)  ?
  C402'  H402a  H402'b  .  .  .  67.1(8)  ?
  C402  H402b  C403'  .  .  .  49.1(12)  ?
  C402  H402b  H403'b  .  .  .  84.8(10)  ?
  C403'  H402b  H403'b  .  .  .  51.8(5)  ?
  C404  H404b  C405'  .  .  .  73.8(6)  ?
  C405  H405b  C405'  .  .  .  78.0(7)  ?
  C402  H402'a  O401'  .  .  .  128.6(8)  ?
  C402  H402'a  C402'  .  .  .  27.8(13)  ?
  O401'  H402'a  C402'  .  .  .  126.6(10)  ?
  C402  H402'b  C402'  .  .  .  40.0(14)  ?
  C402  H402'b  H402a  .  .  .  55.2(11)  ?
  C402'  H402'b  H402a  .  .  .  58.5(11)  ?
  O401  H403'a  C403'  .  .  .  66.4(8)  ?
  C402  H403'b  C403  .  .  .  64.8(10)  ?
  C402  H403'b  C403'  .  .  .  50.3(10)  ?
  C402  H403'b  H402b  .  .  .  46.9(8)  ?
  C403  H403'b  C403'  .  .  .  62.2(6)  ?
  C403  H403'b  H402b  .  .  .  109.8(5)  ?
  C403'  H403'b  H402b  .  .  .  82.9(7)  ?
  C403  H404'a  C404  .  .  .  67.9(5)  ?
  C403  H404'b  C404  .  .  .  67.9(5)  ?
 
loop_
_geom_torsion_atom_site_label_1
_geom_torsion_atom_site_label_2
_geom_torsion_atom_site_label_3
_geom_torsion_atom_site_label_4
_geom_torsion_site_symmetry_1
_geom_torsion_site_symmetry_2
_geom_torsion_site_symmetry_3
_geom_torsion_site_symmetry_4
_geom_torsion
_geom_torsion_publ_flag              #<< enter YES for value to be published
     ?  ?  ?  ?  ?  ?  ?  ?  ?  ?
 
loop_
_geom_hbond_atom_site_label_D
_geom_hbond_atom_site_label_H
_geom_hbond_atom_site_label_A
_geom_hbond_site_symmetry_D
_geom_hbond_site_symmetry_H
_geom_hbond_site_symmetry_A
_geom_hbond_distance_DH
_geom_hbond_distance_HA
_geom_hbond_distance_DA
_geom_hbond_angle_DHA
_geom_hbond_publ_flag               #<< enter YES for value to be published
      ?  ?  ?  ?  ?  ?  ?  ?  ?  ?  ?
 
 
#--------------------------------------------------------------------------
#      Special items requested by author for inclusion in paper
#--------------------------------------------------------------------------
 
loop_
_publ_manuscript_incl_extra_item
_publ_manuscript_incl_extra_defn
                       ?  ?
 
#--------------------------------------------------------------------------
#       Items which are non-mandatory for Acta C submissions
#--------------------------------------------------------------------------
 
loop_
_geom_contact_atom_site_label_1
_geom_contact_atom_site_label_2
_geom_contact_distance
_geom_contact_site_symmetry_1
_geom_contact_site_symmetry_2
_geom_contact_publ_flag
  Na  C21  3.440(4)  .  .  ?
  Na  C26  3.693(4)  .  .  ?
  Na  C31  3.367(3)  .  .  ?
  Na  C36  3.639(4)  .  .  ?
  Na  C102  3.236(7)  .  .  ?
  Na  C105  3.339(7)  .  .  ?
  Na  C202  3.400(10)  .  .  ?
  Na  C205  3.409(7)  .  .  ?
  Na  C202'  3.110(11)  .  .  ?
  Na  C205'  3.407(13)  .  .  ?
  Na  H21  2.81(4)  .  .  ?
  Na  H31  2.76(4)  .  .  ?
  Na  H102a  3.5050(14)  .  .  ?
  Na  H102b  3.1498(15)  .  .  ?
  Na  H105b  3.4118(17)  .  .  ?
  Na  H202b  3.2870(17)  .  .  ?
  Na  H205a  3.5982(14)  .  .  ?
  Na  H205b  3.4620(15)  .  .  ?
  Na  H202'b  2.9219(17)  .  .  ?
  Na  H205'b  3.4484(15)  .  .  ?
  O11  C12  2.418(4)  .  .  ?
  O11  C16  2.375(5)  .  .  ?
  O11  S1  3.082(3)  .  .  ?
  O11  O21  2.748(3)  .  .  ?
  O11  S2  3.000(3)  .  .  ?
  O11  O41  2.580(3)  .  .  ?
  O11  H21  2.05(4)  .  .  ?
  C11  C13  2.419(5)  .  .  ?
  C11  C14  2.834(5)  .  .  ?
  C11  C15  2.426(5)  .  .  ?
  C11  S1  2.780(4)  .  .  ?
  C11  S2  2.776(4)  .  .  ?
  C11  H11  1.79(4)  .  .  ?
  C12  C14  2.448(6)  .  .  ?
  C12  C15  2.782(6)  .  .  ?
  C12  C16  2.412(5)  .  .  ?
  C12  C42  2.802(5)  .  .  ?
  C12  H11  2.53(3)  .  .  ?
  C12  H13  2.043(3)  .  .  ?
  C13  C141  2.564(6)  .  .  ?
  C13  C142'  2.828(11)  .  .  ?
  C13  C15  2.378(6)  .  .  ?
  C13  C16  2.764(5)  .  .  ?
  C13  S1  2.746(4)  .  .  ?
  C13  H142'c  2.646(3)  .  .  ?
  C14  C142  2.545(8)  .  .  ?
  C14  C143  2.473(8)  .  .  ?
  C14  C144  2.663(9)  .  .  ?
  C14  C142'  2.673(12)  .  .  ?
  C14  C143'  2.442(11)  .  .  ?
  C14  C144'  2.383(11)  .  .  ?
  C14  C16  2.433(5)  .  .  ?
  C14  H13  2.037(5)  .  .  ?
  C14  H143b  2.694(4)  .  .  ?
  C14  H143c  2.607(4)  .  .  ?
  C14  H143'b  2.643(4)  .  .  ?
  C14  H143'c  2.570(5)  .  .  ?
  C14  H144'b  2.604(4)  .  .  ?
  C14  H144'c  2.553(4)  .  .  ?
  C14  H15  2.037(5)  .  .  ?
  C141  C15  2.560(5)  .  .  ?
  C141  H142a  2.136(5)  .  .  ?
  C141  H142b  2.133(6)  .  .  ?
  C141  H142c  2.129(5)  .  .  ?
  C141  H143a  1.930(4)  .  .  ?
  C141  H143b  1.923(5)  .  .  ?
  C141  H143c  1.925(5)  .  .  ?
  C141  H144a  2.190(5)  .  .  ?
  C141  H144b  2.187(5)  .  .  ?
  C141  H144c  2.188(5)  .  .  ?
  C141  H142'a  2.280(4)  .  .  ?
  C141  H142'b  2.276(5)  .  .  ?
  C141  H142'c  2.275(5)  .  .  ?
  C141  H143'a  2.098(5)  .  .  ?
  C141  H143'b  2.092(5)  .  .  ?
  C141  H143'c  2.096(5)  .  .  ?
  C141  H144'a  1.848(5)  .  .  ?
  C141  H144'b  1.848(6)  .  .  ?
  C141  H144'c  1.843(6)  .  .  ?
  C142  C143  2.470(12)  .  .  ?
  C142  C144  2.527(13)  .  .  ?
  C142  C142'  2.063(18)  .  .  ?
  C142  H143a  2.670(8)  .  .  ?
  C142  H143b  2.633(8)  .  .  ?
  C142  H144a  2.688(9)  .  .  ?
  C142  H142'a  2.261(8)  .  .  ?
  C142  H142'b  1.840(8)  .  .  ?
  C142  H144'b  1.826(8)  .  .  ?
  C143  C144  2.494(12)  .  .  ?
  C143  C144'  2.388(13)  .  .  ?
  C143  H142a  2.674(8)  .  .  ?
  C143  H144a  2.676(9)  .  .  ?
  C143  H144b  2.687(9)  .  .  ?
  C143  H142'a  1.586(8)  .  .  ?
  C143  H142'b  2.275(9)  .  .  ?
  C143  H143'a  1.531(9)  .  .  ?
  C143  H143'c  2.169(9)  .  .  ?
  C143  H144'a  2.484(8)  .  .  ?
  C144  C15  2.899(8)  .  .  ?
  C144  C303  2.960(15)  .  '3 566'  ?
  C144  C304  2.575(17)  .  '3 566'  ?
  C144  H142a  2.678(9)  .  .  ?
  C144  H142b  2.653(9)  .  .  ?
  C144  H143a  2.552(8)  .  .  ?
  C144  H143'a  1.979(8)  .  .  ?
  C144  H143'c  1.814(9)  .  .  ?
  C144  H144'a  1.857(9)  .  .  ?
  C144  H144'c  2.534(9)  .  .  ?
  C144  H15  2.446(7)  .  .  ?
  C144  H303a  2.675(9)  .  '3 566'  ?
  C144  H304a  2.268(9)  .  '3 566'  ?
  C144  H304b  2.271(9)  .  '3 566'  ?
  C142'  C143'  2.41(2)  .  .  ?
  C142'  C144'  2.501(19)  .  .  ?
  C142'  H13  2.329(12)  .  .  ?
  C142'  H142a  2.329(16)  .  .  ?
  C142'  H142c  1.900(15)  .  .  ?
  C142'  H143a  1.703(14)  .  .  ?
  C142'  H143c  2.100(14)  .  .  ?
  C142'  H143'b  2.383(14)  .  .  ?
  C142'  H144'a  2.596(16)  .  .  ?
  C142'  H144'c  2.609(15)  .  .  ?
  C143'  C144'  2.548(16)  .  .  ?
  C143'  O401'  2.967(14)  .  '3 566'  ?
  C143'  H143a  1.563(11)  .  .  ?
  C143'  H143b  2.076(13)  .  .  ?
  C143'  H144a  2.245(11)  .  .  ?
  C143'  H144b  1.691(12)  .  .  ?
  C143'  H142'c  2.575(13)  .  .  ?
  C144'  H142c  1.916(14)  .  .  ?
  C144'  H143a  2.534(10)  .  .  ?
  C144'  H144a  1.830(13)  .  .  ?
  C144'  H144b  2.496(14)  .  .  ?
  C144'  H144c  1.731(13)  .  .  ?
  C144'  H142'a  2.681(11)  .  .  ?
  C144'  H142'b  2.631(12)  .  .  ?
  C15  S2  2.731(4)  .  .  ?
  C16  C22  2.809(5)  .  .  ?
  C16  H15  2.040(4)  .  .  ?
  S1  O41  3.025(2)  .  .  ?
  S1  C41  2.772(3)  .  .  ?
  S1  C43  2.741(4)  .  .  ?
  S1  H11  2.80(4)  .  .  ?
  O21  C22  2.422(4)  .  .  ?
  O21  C26  2.380(4)  .  .  ?
  O21  S2  3.042(3)  .  .  ?
  O21  S3  3.000(3)  .  .  ?
  C21  C23  2.422(5)  .  .  ?
  C21  C24  2.834(5)  .  .  ?
  C21  C25  2.417(5)  .  .  ?
  C21  S2  2.766(3)  .  .  ?
  C21  S3  2.775(3)  .  .  ?
  C21  H21  1.76(5)  .  .  ?
  C22  C24  2.431(6)  .  .  ?
  C22  C25  2.760(5)  .  .  ?
  C22  C26  2.404(4)  .  .  ?
  C22  H21  2.41(5)  .  .  ?
  C22  H23  2.207(4)  .  .  ?
  C23  C241  2.549(6)  .  .  ?
  C23  C25  2.365(5)  .  .  ?
  C23  C26  2.761(4)  .  .  ?
  C23  S2  2.758(4)  .  .  ?
  C24  C242  2.477(10)  .  .  ?
  C24  C243  2.570(8)  .  .  ?
  C24  C244  2.513(6)  .  .  ?
  C24  C26  2.434(5)  .  .  ?
  C24  H23  2.211(3)  .  .  ?
  C24  H242b  2.668(4)  .  .  ?
  C24  H242c  2.624(4)  .  .  ?
  C24  H244b  2.670(3)  .  .  ?
  C24  H25  2.210(3)  .  .  ?
  C241  C25  2.568(6)  .  .  ?
  C241  H242a  2.023(5)  .  .  ?
  C241  H242b  2.026(4)  .  .  ?
  C241  H242c  2.024(5)  .  .  ?
  C241  H243a  2.065(5)  .  .  ?
  C241  H243b  2.062(5)  .  .  ?
  C241  H243c  2.068(4)  .  .  ?
  C241  H244a  2.063(4)  .  .  ?
  C241  H244b  2.064(4)  .  .  ?
  C241  H244c  2.060(4)  .  .  ?
  C242  C243  2.452(11)  .  .  ?
  C242  C244  2.514(9)  .  .  ?
  C242  H243a  2.628(8)  .  .  ?
  C242  H243c  2.608(8)  .  .  ?
  C243  C244  2.454(8)  .  .  ?
  C243  C25  2.891(8)  .  .  ?
  C243  H242a  2.623(8)  .  .  ?
  C243  H242b  2.606(7)  .  .  ?
  C243  H244a  2.636(6)  .  .  ?
  C243  H244c  2.604(6)  .  .  ?
  C243  H25  2.448(6)  .  .  ?
  C244  H242a  2.666(6)  .  .  ?
  C244  H243a  2.616(6)  .  .  ?
  C244  H243b  2.627(6)  .  .  ?
  C25  S3  2.755(4)  .  .  ?
  C26  C36  2.760(4)  .  .  ?
  C26  H25  2.213(4)  .  .  ?
  S2  H21  2.59(4)  .  .  ?
  O31  C32  2.418(4)  .  .  ?
  O31  C36  2.384(4)  .  .  ?
  O31  S3  3.014(3)  .  .  ?
  O31  O41  2.546(3)  .  .  ?
  O31  S4  3.056(2)  .  .  ?
  C31  C33  2.429(4)  .  .  ?
  C31  C34  2.854(5)  .  .  ?
  C31  C35  2.424(5)  .  .  ?
  C31  S3  2.788(3)  .  .  ?
  C31  S4  2.770(3)  .  .  ?
  C31  H31  1.83(4)  .  .  ?
  C32  C34  2.438(5)  .  .  ?
  C32  C35  2.765(5)  .  .  ?
  C32  C36  2.411(4)  .  .  ?
  C32  C46  2.832(4)  .  .  ?
  C32  H31  2.56(4)  .  .  ?
  C32  H33  2.026(3)  .  .  ?
  C33  C341  2.568(6)  .  .  ?
  C33  C344  2.852(7)  .  .  ?
  C33  C35  2.380(5)  .  .  ?
  C33  C36  2.766(4)  .  .  ?
  C33  S4  2.746(4)  .  .  ?
  C34  C342  2.506(7)  .  .  ?
  C34  C343  2.485(7)  .  .  ?
  C34  C344  2.508(6)  .  .  ?
  C34  C36  2.440(4)  .  .  ?
  C34  H33  2.037(3)  .  .  ?
  C34  H342b  2.692(3)  .  .  ?
  C34  H342c  2.679(3)  .  .  ?
  C34  H343b  2.681(4)  .  .  ?
  C34  H343c  2.653(4)  .  .  ?
  C34  H344c  2.664(3)  .  .  ?
  C34  H35  2.046(3)  .  .  ?
  C341  C35  2.545(5)  .  .  ?
  C341  H342a  2.061(4)  .  .  ?
  C341  H342b  2.063(3)  .  .  ?
  C341  H342c  2.060(4)  .  .  ?
  C341  H343a  2.054(4)  .  .  ?
  C341  H343b  2.054(4)  .  .  ?
  C341  H343c  2.050(4)  .  .  ?
  C341  H344a  2.017(4)  .  .  ?
  C341  H344b  2.022(4)  .  .  ?
  C341  H344c  2.029(4)  .  .  ?
  C341  H35  2.684(4)  .  .  ?
  C342  C343  2.501(7)  .  .  ?
  C342  C344  2.460(7)  .  .  ?
  C342  H343a  2.683(5)  .  .  ?
  C342  H343b  2.650(5)  .  .  ?
  C342  H344a  2.572(5)  .  .  ?
  C342  H344c  2.639(5)  .  .  ?
  C343  C344  2.487(8)  .  .  ?
  C343  H342a  2.676(5)  .  .  ?
  C343  H342c  2.682(4)  .  .  ?
  C343  H344a  2.666(5)  .  .  ?
  C343  H344b  2.642(5)  .  .  ?
  C344  H33  2.470(6)  .  .  ?
  C344  H342a  2.611(6)  .  .  ?
  C344  H342b  2.621(5)  .  .  ?
  C344  H343a  2.640(6)  .  .  ?
  C35  S3  2.740(3)  .  .  ?
  C36  H35  2.019(4)  .  .  ?
  O41  C42  2.399(3)  .  .  ?
  O41  C46  2.400(4)  .  .  ?
  O41  S4  3.052(3)  .  .  ?
  O41  O01  2.771(7)  .  '3 567'  ?
  O41  O01'  2.789(7)  .  '3 567'  ?
  O41  H11  1.96(4)  .  .  ?
  O41  H31  1.76(4)  .  .  ?
  C41  C43  2.450(4)  .  .  ?
  C41  C44  2.876(4)  .  .  ?
  C41  C45  2.443(5)  .  .  ?
  C41  S4  2.776(3)  .  .  ?
  C42  C44  2.441(5)  .  .  ?
  C42  C45  2.761(5)  .  .  ?
  C42  C46  2.404(5)  .  .  ?
  C42  H43  2.033(3)  .  .  ?
  C43  C441  2.561(5)  .  .  ?
  C43  C443'  2.808(10)  .  .  ?
  C43  C45  2.371(5)  .  .  ?
  C43  C46  2.768(4)  .  .  ?
  C43  H443'b  2.622(3)  .  .  ?
  C44  C442  2.653(9)  .  .  ?
  C44  C443  2.577(8)  .  .  ?
  C44  C444  2.545(8)  .  .  ?
  C44  C442'  2.400(11)  .  .  ?
  C44  C443'  2.498(9)  .  .  ?
  C44  C444'  2.441(10)  .  .  ?
  C44  C46  2.449(4)  .  .  ?
  C44  H43  2.035(3)  .  .  ?
  C44  H442'b  2.598(4)  .  .  ?
  C44  H442'c  2.552(4)  .  .  ?
  C44  H443'b  2.653(3)  .  .  ?
  C44  H443'c  2.684(3)  .  .  ?
  C44  H444'b  2.640(4)  .  .  ?
  C44  H444'c  2.609(4)  .  .  ?
  C44  H45  2.037(3)  .  .  ?
  C441  C45  2.577(5)  .  .  ?
  C441  H43  2.699(4)  .  .  ?
  C441  H442a  2.095(4)  .  .  ?
  C441  H442b  2.092(4)  .  .  ?
  C441  H442c  2.095(4)  .  .  ?
  C441  H443a  2.109(4)  .  .  ?
  C441  H443b  2.110(4)  .  .  ?
  C441  H443c  2.114(4)  .  .  ?
  C441  H444a  2.069(4)  .  .  ?
  C441  H444b  2.074(4)  .  .  ?
  C441  H444c  2.067(4)  .  .  ?
  C441  H442'a  2.002(4)  .  .  ?
  C441  H442'b  1.999(4)  .  .  ?
  C441  H442'c  2.006(4)  .  .  ?
  C441  H443'a  2.026(3)  .  .  ?
  C441  H443'b  2.031(4)  .  .  ?
  C441  H443'c  2.028(4)  .  .  ?
  C441  H444'a  2.112(4)  .  .  ?
  C441  H444'b  2.115(4)  .  .  ?
  C441  H444'c  2.111(4)  .  .  ?
  C442  C443  2.469(12)  .  .  ?
  C442  C444  2.493(12)  .  .  ?
  C442  C443'  2.783(13)  .  .  ?
  C442  H443a  2.553(8)  .  .  ?
  C442  H443b  2.686(9)  .  .  ?
  C442  H444a  2.582(8)  .  .  ?
  C442  H442'a  1.538(9)  .  .  ?
  C442  H442'c  2.301(9)  .  .  ?
  C442  H444'a  1.608(9)  .  .  ?
  C442  H444'b  2.437(9)  .  .  ?
  C442  H444'c  1.515(9)  .  .  ?
  C442  H45  2.628(7)  .  .  ?
  C443  C444  2.484(13)  .  .  ?
  C443  H442a  2.599(9)  .  .  ?
  C443  H442c  2.667(8)  .  .  ?
  C443  H444a  2.653(9)  .  .  ?
  C443  H444b  2.653(9)  .  .  ?
  C443  H442'a  1.672(9)  .  .  ?
  C443  H442'b  2.431(8)  .  .  ?
  C443  H443'a  1.766(9)  .  .  ?
  C443  H443'c  2.486(9)  .  .  ?
  C444  C442'  2.841(13)  .  .  ?
  C444  H442a  2.637(9)  .  .  ?
  C444  H443a  2.670(9)  .  .  ?
  C444  H443c  2.661(9)  .  .  ?
  C444  H443'a  1.561(8)  .  .  ?
  C444  H443'b  2.170(9)  .  .  ?
  C444  H444'a  1.853(9)  .  .  ?
  C444  H444'b  1.551(8)  .  .  ?
  C444  H444'c  2.541(8)  .  .  ?
  C442'  C443'  2.493(14)  .  .  ?
  C442'  C444'  2.476(16)  .  .  ?
  C442'  C45  2.971(10)  .  .  ?
  C442'  H442a  1.782(10)  .  .  ?
  C442'  H442b  2.256(10)  .  .  ?
  C442'  H443a  1.822(8)  .  .  ?
  C442'  H443c  2.393(10)  .  .  ?
  C442'  H444'c  2.657(10)  .  .  ?
  C442'  H303'b  2.344(11)  .  .  ?
  C443'  C444'  2.520(14)  .  .  ?
  C443'  H142'a  2.622(9)  .  '3 466'  ?
  C443'  H43  2.407(10)  .  .  ?
  C443'  H443a  1.830(11)  .  .  ?
  C443'  H443b  2.437(11)  .  .  ?
  C443'  H444a  1.621(10)  .  .  ?
  C443'  H444c  2.200(11)  .  .  ?
  C443'  H442'a  2.646(11)  .  .  ?
  C444'  C45  2.978(9)  .  .  ?
  C444'  H442a  1.916(12)  .  .  ?
  C444'  H442c  2.339(11)  .  .  ?
  C444'  H444a  1.945(9)  .  .  ?
  C444'  H444b  2.506(9)  .  .  ?
  C444'  H442'b  2.558(11)  .  .  ?
  C444'  H443'c  2.623(9)  .  .  ?
  C45  S4  2.736(3)  .  .  ?
  C45  H442'b  2.699(4)  .  .  ?
  C45  H444'c  2.660(3)  .  .  ?
  C46  H45  2.033(3)  .  .  ?
  S4  H31  2.80(4)  .  .  ?
  S4  H45  2.7990(9)  .  .  ?
  O101  C103  2.282(8)  .  .  ?
  O101  C104  2.328(7)  .  .  ?
  O101  H102a  1.951(3)  .  .  ?
  O101  H102b  1.962(4)  .  .  ?
  O101  H105a  1.917(4)  .  .  ?
  O101  H105b  1.928(3)  .  .  ?
  C102  C104  2.301(11)  .  .  ?
  C102  C105  2.264(11)  .  .  ?
  C102  H103a  1.856(8)  .  .  ?
  C102  H103b  1.932(8)  .  .  ?
  C103  C105  2.369(9)  .  .  ?
  C103  H102a  1.876(8)  .  .  ?
  C103  H102b  1.894(8)  .  .  ?
  C103  H104a  2.052(8)  .  .  ?
  C103  H104b  2.069(8)  .  .  ?
  C104  H103a  2.023(6)  .  .  ?
  C104  H103b  2.031(7)  .  .  ?
  C104  H105a  2.040(6)  .  .  ?
  C104  H105b  2.048(6)  .  .  ?
  C105  H104a  2.057(6)  .  .  ?
  C105  H104b  2.072(7)  .  .  ?
  O201  C203  2.272(15)  .  .  ?
  O201  C204  2.467(8)  .  .  ?
  O201  C203'  2.167(12)  .  .  ?
  O201  C204'  2.385(12)  .  .  ?
  O201  H202a  1.959(4)  .  .  ?
  O201  H202b  1.957(3)  .  .  ?
  O201  H205a  1.922(3)  .  .  ?
  O201  H205b  1.931(4)  .  .  ?
  O201  H202'a  2.147(4)  .  .  ?
  O201  H202'b  2.139(4)  .  .  ?
  O201  H203'b  2.467(3)  .  .  ?
  O201  H205'a  1.778(3)  .  .  ?
  O201  H205'b  1.780(4)  .  .  ?
  C202  C204  2.312(12)  .  .  ?
  C202  C205  2.285(12)  .  .  ?
  C202  H203a  2.042(10)  .  .  ?
  C202  H203b  2.006(12)  .  .  ?
  C202  H204a  2.611(11)  .  .  ?
  C202  H202'a  1.768(14)  .  .  ?
  C202  H202'b  1.837(10)  .  .  ?
  C202  H203'a  1.691(10)  .  .  ?
  C202  H204'a  2.124(11)  .  .  ?
  C202  H204'b  2.181(10)  .  .  ?
  C202  H205'a  2.377(10)  .  .  ?
  C202  H205'b  2.460(10)  .  .  ?
  C203  C205  2.302(17)  .  .  ?
  C203  C202'  2.32(2)  .  .  ?
  C203  H202a  2.057(18)  .  .  ?
  C203  H202b  1.965(14)  .  .  ?
  C203  H204a  2.23(2)  .  .  ?
  C203  H204b  2.222(15)  .  .  ?
  C203  H205b  2.508(15)  .  .  ?
  C203  H203'a  2.033(16)  .  .  ?
  C203  H203'b  1.710(15)  .  .  ?
  C203  H205'a  2.475(17)  .  .  ?
  C203  H205'b  2.215(15)  .  .  ?
  C204  C202'  2.944(14)  .  .  ?
  C204  C203'  2.519(18)  .  .  ?
  C204  H202a  2.635(8)  .  .  ?
  C204  H203a  2.132(8)  .  .  ?
  C204  H203b  2.136(8)  .  .  ?
  C204  H205a  1.941(8)  .  .  ?
  C204  H205b  1.955(8)  .  .  ?
  C204  H204'b  1.838(8)  .  .  ?
  C204  H205'b  1.782(8)  .  .  ?
  C205  C202'  2.674(14)  .  .  ?
  C205  C203'  2.848(16)  .  .  ?
  C205  C204'  2.204(14)  .  .  ?
  C205  H203b  2.622(8)  .  .  ?
  C205  H204a  2.078(8)  .  .  ?
  C205  H204b  2.034(8)  .  .  ?
  C205  H204'a  2.630(8)  .  .  ?
  C202'  C204'  2.403(16)  .  .  ?
  C202'  C205'  2.300(18)  .  .  ?
  C202'  H203'a  2.002(11)  .  .  ?
  C202'  H203'b  1.959(11)  .  .  ?
  C202'  H205'a  2.613(11)  .  .  ?
  C203'  C205'  2.35(2)  .  .  ?
  C203'  H203a  1.557(16)  .  .  ?
  C203'  H203b  1.88(2)  .  .  ?
  C203'  H202'a  2.085(17)  .  .  ?
  C203'  H202'b  2.164(17)  .  .  ?
  C203'  H204'a  1.949(14)  .  .  ?
  C203'  H204'b  1.93(2)  .  .  ?
  C204'  H202a  2.028(11)  .  .  ?
  C204'  H202b  2.288(9)  .  .  ?
  C204'  H204a  1.769(9)  .  .  ?
  C204'  H204b  1.899(10)  .  .  ?
  C204'  H205b  2.522(12)  .  .  ?
  C204'  H203'a  2.128(10)  .  .  ?
  C204'  H203'b  2.115(8)  .  .  ?
  C204'  H205'a  2.248(12)  .  .  ?
  C204'  H205'b  2.246(12)  .  .  ?
  C205'  H202a  2.343(14)  .  .  ?
  C205'  H202b  2.651(12)  .  .  ?
  C205'  H203b  2.216(14)  .  .  ?
  C205'  H204a  1.910(13)  .  .  ?
  C205'  H204b  1.969(13)  .  .  ?
  C205'  H202'a  2.667(15)  .  .  ?
  C205'  H204'a  2.250(14)  .  .  ?
  C205'  H204'b  2.350(14)  .  .  ?
  O301  C303  2.375(12)  .  .  ?
  O301  C304  2.291(14)  .  .  ?
  O301  C303'  2.433(12)  .  .  ?
  O301  C304'  2.359(12)  .  .  ?
  O301  O01'  2.905(9)  .  '2 546'  ?
  O301  H302a  2.043(5)  .  .  ?
  O301  H302b  2.046(5)  .  .  ?
  O301  H305a  2.036(5)  .  .  ?
  O301  H305b  2.032(5)  .  .  ?
  C302  C304  2.356(13)  .  .  ?
  C302  C305  2.303(9)  .  .  ?
  C302  C304'  2.328(13)  .  .  ?
  C302  H303a  1.940(8)  .  .  ?
  C302  H303b  1.964(7)  .  .  ?
  C302  H303'a  2.114(8)  .  .  ?
  C302  H303'b  2.128(8)  .  .  ?
  C303  C305  2.281(12)  .  .  ?
  C303  H144b  2.377(12)  .  '3 566'  ?
  C303  H302a  1.921(10)  .  .  ?
  C303  H302b  1.946(12)  .  .  ?
  C303  H304a  2.108(11)  .  .  ?
  C303  H304b  2.132(10)  .  .  ?
  C303  H305b  2.674(11)  .  .  ?
  C303  H303'b  2.139(13)  .  .  ?
  C303  H304'a  2.191(10)  .  .  ?
  C304  C303'  2.171(17)  .  .  ?
  C304  H144a  2.421(13)  .  '3 566'  ?
  C304  H144b  2.411(14)  .  '3 566'  ?
  C304  H144c  2.456(14)  .  '3 566'  ?
  C304  H303a  2.145(12)  .  .  ?
  C304  H303b  2.136(13)  .  .  ?
  C304  H305a  1.892(14)  .  .  ?
  C304  H305b  1.890(14)  .  .  ?
  C304  H303'a  2.333(13)  .  .  ?
  C304  H304'a  1.616(13)  .  .  ?
  C304  H304'b  2.515(14)  .  .  ?
  C305  C303'  2.362(12)  .  .  ?
  C305  H304a  1.916(7)  .  .  ?
  C305  H304b  1.931(7)  .  .  ?
  C305  H304'a  2.067(6)  .  .  ?
  C305  H304'b  2.081(7)  .  .  ?
  C303'  O401  2.659(13)  .  .  ?
  C303'  H442'c  2.538(13)  .  .  ?
  C303'  H302a  2.359(12)  .  .  ?
  C303'  H303a  2.065(14)  .  .  ?
  C303'  H304b  2.495(10)  .  .  ?
  C303'  H305b  2.299(11)  .  .  ?
  C303'  H304'a  1.966(10)  .  .  ?
  C303'  H304'b  1.938(13)  .  .  ?
  C304'  O401  2.932(13)  .  .  ?
  C304'  H302b  2.456(11)  .  .  ?
  C304'  H303b  1.770(12)  .  .  ?
  C304'  H304a  2.527(14)  .  .  ?
  C304'  H304b  1.632(13)  .  .  ?
  C304'  H305a  2.360(11)  .  .  ?
  C304'  H303'a  1.950(12)  .  .  ?
  C304'  H303'b  1.980(11)  .  .  ?
  O401  C403  2.280(11)  .  .  ?
  O401  C404  2.262(10)  .  .  ?
  O401  C405'  2.366(11)  .  .  ?
  O401  H303b  2.485(8)  .  .  ?
  O401  H303'a  2.377(8)  .  .  ?
  O401  H303'b  2.350(8)  .  .  ?
  O401  H402a  1.902(8)  .  .  ?
  O401  H402b  1.898(8)  .  .  ?
  O401  H405a  1.863(8)  .  .  ?
  O401  H405b  1.876(9)  .  .  ?
  O401  H402'a  1.657(11)  .  .  ?
  O401  H402'b  1.644(8)  .  .  ?
  O401  H403'b  2.197(8)  .  .  ?
  O401  H405'a  2.622(9)  .  .  ?
  C402  C404  2.177(16)  .  .  ?
  C402  C405  2.164(18)  .  .  ?
  C402  O401'  2.00(2)  .  .  ?
  C402  C405'  2.50(2)  .  .  ?
  C402  H403a  1.794(14)  .  .  ?
  C402  H403b  2.183(18)  .  .  ?
  C402  H404a  2.693(15)  .  .  ?
  C402  H403'a  1.66(2)  .  .  ?
  C402  H404'a  2.597(15)  .  .  ?
  C402  H404'b  2.597(15)  .  .  ?
  C403  C405  2.255(13)  .  .  ?
  C403  O401'  2.055(14)  .  .  ?
  C403  H402a  1.952(12)  .  .  ?
  C403  H402b  1.947(11)  .  .  ?
  C403  H404a  1.796(13)  .  .  ?
  C403  H404b  1.839(10)  .  .  ?
  C403  H402'a  1.885(12)  .  .  ?
  C403  H402'b  2.543(11)  .  .  ?
  C403  H403'a  2.245(11)  .  .  ?
  C403  H405'a  2.659(9)  .  .  ?
  C403  H405'b  2.154(11)  .  .  ?
  C404  O401'  2.128(10)  .  .  ?
  C404  C402'  2.324(11)  .  .  ?
  C404  H403a  1.855(7)  .  .  ?
  C404  H403b  1.838(8)  .  .  ?
  C404  H405a  2.062(8)  .  .  ?
  C404  H405b  2.047(8)  .  .  ?
  C404  H402'a  2.338(6)  .  .  ?
  C404  H403'a  2.188(7)  .  .  ?
  C404  H403'b  2.225(7)  .  .  ?
  C404  H405'a  1.692(8)  .  .  ?
  C404  H405'b  1.737(9)  .  .  ?
  C405  H304'a  2.684(11)  .  .  ?
  C405  H404a  2.119(12)  .  .  ?
  C405  H404b  2.118(11)  .  .  ?
  C405  H402'a  2.108(14)  .  .  ?
  C405  H403'a  1.816(14)  .  .  ?
  C405  H403'b  2.689(11)  .  .  ?
  C405  H404'a  2.534(10)  .  .  ?
  C405  H404'b  2.534(10)  .  .  ?
  C405  H405'a  1.501(13)  .  .  ?
  C405  H405'b  2.519(13)  .  .  ?
  O401'  C403'  2.308(12)  .  .  ?
  O401'  H143'a  2.557(7)  .  '3 566'  ?
  O401'  H402a  1.846(6)  .  .  ?
  O401'  H403b  2.156(8)  .  .  ?
  O401'  H404b  2.315(7)  .  .  ?
  O401'  H405b  1.683(8)  .  .  ?
  O401'  H402'b  2.264(6)  .  .  ?
  O401'  H405'a  1.919(7)  .  .  ?
  O401'  H405'b  1.908(6)  .  .  ?
  C402'  C405'  2.285(12)  .  .  ?
  C402'  H303'a  2.687(18)  .  .  ?
  C402'  H402b  1.549(17)  .  .  ?
  C402'  H403a  2.437(17)  .  .  ?
  C402'  H403b  2.419(16)  .  .  ?
  C402'  H405b  2.328(14)  .  .  ?
  C402'  H403'a  1.976(14)  .  .  ?
  C402'  H403'b  1.955(17)  .  .  ?
  C403'  C405'  2.305(10)  .  .  ?
  C403'  H402a  1.930(13)  .  .  ?
  C403'  H403a  1.561(11)  .  .  ?
  C403'  H403b  2.304(9)  .  .  ?
  C403'  H404a  1.889(11)  .  .  ?
  C403'  H404b  2.520(8)  .  .  ?
  C403'  H405a  2.191(11)  .  .  ?
  C403'  H405b  2.539(10)  .  .  ?
  C403'  H402'a  2.012(11)  .  .  ?
  C403'  H402'b  2.044(13)  .  .  ?
  C403'  H404'a  2.139(10)  .  .  ?
  C403'  H404'b  2.139(10)  .  .  ?
  C405'  H403a  2.691(8)  .  .  ?
  C405'  H403b  1.937(8)  .  .  ?
  C405'  H404a  2.153(8)  .  .  ?
  C405'  H405a  2.374(8)  .  .  ?
  C405'  H402'a  1.895(7)  .  .  ?
  C405'  H404'a  1.812(8)  .  .  ?
  C405'  H404'b  1.812(8)  .  .  ?
  O01  O01  2.078(10)  .  '3 567'  ?
  O01  O01'  2.865(10)  .  '3 567'  ?
  O01'  H102b  2.499(5)  .  .  ?
  H11  H21  2.37(6)  .  .  ?
  H13  H143b  2.3791(5)  .  .  ?
  H13  H142'b  2.1570(2)  .  .  ?
  H13  H142'c  2.0316(4)  .  .  ?
  H142a  H142b  1.5512(2)  .  .  ?
  H142a  H142c  1.5513(2)  .  .  ?
  H142a  H142'a  2.1208(3)  .  .  ?
  H142a  H142'b  2.2368(3)  .  .  ?
  H142a  H144'b  2.1291(3)  .  .  ?
  H142a  H144'c  1.3066(2)  .  .  ?
  H142b  H142c  1.55133(19)  .  .  ?
  H142b  H144'a  1.7472(3)  .  .  ?
  H142b  H144'b  1.5171(2)  .  .  ?
  H142c  H142'a  2.2109(3)  .  .  ?
  H142c  H142'b  1.1990(2)  .  .  ?
  H142c  H144'a  2.2168(3)  .  .  ?
  H142c  H144'c  1.27042(15)  .  .  ?
  H143a  H143b  1.5508(2)  .  .  ?
  H143a  H143c  1.55129(16)  .  .  ?
  H143a  H144a  2.3871(3)  .  .  ?
  H143a  H142'a  1.44901(19)  .  .  ?
  H143a  H142'c  2.1076(3)  .  .  ?
  H143a  H143'a  1.25055(19)  .  .  ?
  H143a  H143'b  1.81832(18)  .  .  ?
  H143a  H144'a  2.2650(4)  .  .  ?
  H143b  H143c  1.5513(2)  .  .  ?
  H143b  H142'a  1.29882(13)  .  .  ?
  H143b  H142'b  1.72095(17)  .  .  ?
  H143b  H143'b  1.8237(3)  .  .  ?
  H143c  H142'c  1.9930(3)  .  .  ?
  H143c  H143'a  1.46410(19)  .  .  ?
  H143c  H143'c  1.6892(2)  .  .  ?
  H144a  H144b  1.55134(16)  .  .  ?
  H144a  H144c  1.5513(2)  .  .  ?
  H144a  H143'a  1.8986(3)  .  .  ?
  H144a  H143'c  2.3684(3)  .  .  ?
  H144a  H144'a  1.5794(2)  .  .  ?
  H144a  H144'b  1.7547(3)  .  .  ?
  H144a  H203'a  2.2508(4)  .  '2 556'  ?
  H144a  H304a  2.1765(3)  .  '3 566'  ?
  H144a  H304b  1.8744(2)  .  '3 566'  ?
  H144b  H144c  1.5513(2)  .  .  ?
  H144b  H143'a  1.83232(18)  .  .  ?
  H144b  H143'c  1.1465(2)  .  .  ?
  H144b  H144'b  2.2470(2)  .  .  ?
  H144b  H15  2.3927(5)  .  .  ?
  H144b  H303a  2.1331(3)  .  '3 566'  ?
  H144b  H304b  2.0897(3)  .  '3 566'  ?
  H144c  H144'a  2.1929(3)  .  .  ?
  H144c  H15  2.0931(3)  .  .  ?
  H144c  H303a  2.3966(4)  .  '3 566'  ?
  H144c  H304a  1.8795(2)  .  '3 566'  ?
  H142'a  H142'b  1.5513(3)  .  .  ?
  H142'a  H142'c  1.5514(2)  .  .  ?
  H142'a  H443'a  2.1180(2)  .  '3 466'  ?
  H142'b  H142'c  1.5514(2)  .  .  ?
  H142'b  H144'c  2.3208(3)  .  .  ?
  H142'c  H143'b  2.2325(3)  .  .  ?
  H143'a  H143'b  1.5510(2)  .  .  ?
  H143'a  H143'c  1.55118(19)  .  .  ?
  H143'b  H143'c  1.55134(18)  .  .  ?
  H143'b  H402b  2.3943(3)  .  .  ?
  H144'a  H144'b  1.55118(18)  .  .  ?
  H144'a  H144'c  1.5512(3)  .  .  ?
  H144'b  H144'c  1.5514(2)  .  .  ?
  H23  H244b  2.1764(3)  .  .  ?
  H242a  H242b  1.5511(3)  .  .  ?
  H242a  H242c  1.55121(16)  .  .  ?
  H242b  H242c  1.55130(16)  .  .  ?
  H242b  H243c  2.3973(4)  .  .  ?
  H243a  H243b  1.55141(16)  .  .  ?
  H243a  H243c  1.5513(3)  .  .  ?
  H243b  H243c  1.55140(16)  .  .  ?
  H243b  H25  2.3028(4)  .  .  ?
  H243c  H25  2.0727(3)  .  .  ?
  H244a  H244b  1.55130(16)  .  .  ?
  H244a  H244c  1.55111(16)  .  .  ?
  H244b  H244c  1.5515(3)  .  .  ?
  H33  H344b  2.2973(4)  .  .  ?
  H33  H344c  2.1878(2)  .  .  ?
  H342a  H342b  1.5514(3)  .  .  ?
  H342a  H342c  1.5512(2)  .  .  ?
  H342a  H344a  2.3594(3)  .  .  ?
  H342b  H342c  1.55125(19)  .  .  ?
  H342c  H35  2.3869(4)  .  .  ?
  H343a  H343b  1.5514(2)  .  .  ?
  H343a  H343c  1.55136(18)  .  .  ?
  H343b  H343c  1.5513(2)  .  .  ?
  H343b  H35  2.3274(4)  .  .  ?
  H344a  H344b  1.55305(18)  .  .  ?
  H344a  H344c  1.5530(2)  .  .  ?
  H344b  H344c  1.5512(2)  .  .  ?
  H43  H444b  2.3954(3)  .  .  ?
  H43  H443'b  2.0656(3)  .  .  ?
  H43  H443'c  2.2296(2)  .  .  ?
  H442a  H442b  1.5514(3)  .  .  ?
  H442a  H442c  1.5514(2)  .  .  ?
  H442a  H443a  2.3228(3)  .  .  ?
  H442a  H444a  2.3661(3)  .  .  ?
  H442a  H442'a  1.36287(15)  .  .  ?
  H442a  H442'b  1.9193(2)  .  .  ?
  H442a  H444'a  1.5162(2)  .  .  ?
  H442a  H444'c  2.1698(4)  .  .  ?
  H442b  H442c  1.55145(18)  .  .  ?
  H442b  H442'b  1.9290(2)  .  .  ?
  H442b  H444'a  1.4271(2)  .  .  ?
  H442b  H444'b  2.0585(2)  .  .  ?
  H442c  H442'a  1.5411(2)  .  .  ?
  H442c  H442'c  1.9741(3)  .  .  ?
  H442c  H444'c  2.1145(3)  .  .  ?
  H443a  H443b  1.5513(2)  .  .  ?
  H443a  H443c  1.5513(2)  .  .  ?
  H443a  H442'a  1.42629(16)  .  .  ?
  H443a  H442'c  1.9283(3)  .  .  ?
  H443a  H443'a  1.55296(18)  .  .  ?
  H443a  H443'b  1.9589(3)  .  .  ?
  H443b  H443c  1.55124(18)  .  .  ?
  H443b  H442'a  1.7269(3)  .  .  ?
  H443b  H442'b  2.1622(3)  .  .  ?
  H443b  H443'b  2.2105(3)  .  .  ?
  H443b  H303'b  1.8475(2)  .  .  ?
  H443c  H442'c  2.1124(2)  .  .  ?
  H443c  H443'a  1.8344(2)  .  .  ?
  H443c  H443'c  2.2572(3)  .  .  ?
  H444a  H444b  1.5515(2)  .  .  ?
  H444a  H444c  1.5515(3)  .  .  ?
  H444a  H443'a  1.28810(16)  .  .  ?
  H444a  H443'c  1.6739(3)  .  .  ?
  H444a  H444'a  1.6726(2)  .  .  ?
  H444a  H444'b  2.0666(3)  .  .  ?
  H444b  H444c  1.5513(2)  .  .  ?
  H444b  H443'a  1.6289(3)  .  .  ?
  H444b  H443'b  1.7938(2)  .  .  ?
  H444b  H444'b  2.2709(3)  .  .  ?
  H444c  H443'c  1.7614(2)  .  .  ?
  H444c  H444'a  1.7828(2)  .  .  ?
  H444c  H444'c  2.2283(3)  .  .  ?
  H442'a  H442'b  1.5512(2)  .  .  ?
  H442'a  H442'c  1.55131(19)  .  .  ?
  H442'b  H442'c  1.5513(2)  .  .  ?
  H442'b  H444'c  2.3849(3)  .  .  ?
  H442'b  H45  2.2899(4)  .  .  ?
  H442'b  H304'b  2.3180(3)  .  .  ?
  H442'c  H303'b  1.6567(2)  .  .  ?
  H443'a  H443'b  1.5514(2)  .  .  ?
  H443'a  H443'c  1.5518(2)  .  .  ?
  H443'b  H443'c  1.55160(18)  .  .  ?
  H444'a  H444'b  1.5515(2)  .  .  ?
  H444'a  H444'c  1.55144(18)  .  .  ?
  H444'b  H444'c  1.55124(18)  .  .  ?
  H444'c  H45  2.2281(3)  .  .  ?
  H102a  H102b  1.5513(2)  .  .  ?
  H102a  H103a  1.9831(3)  .  .  ?
  H102a  H205a  2.1440(4)  .  .  ?
  H102b  H103b  1.9835(3)  .  .  ?
  H103a  H103b  1.55133(18)  .  .  ?
  H103a  H104a  2.1762(3)  .  .  ?
  H103b  H104b  2.1751(3)  .  .  ?
  H104a  H104b  1.55131(18)  .  .  ?
  H104a  H105a  2.1726(3)  .  .  ?
  H104b  H105b  2.1727(3)  .  .  ?
  H105a  H105b  1.55129(18)  .  .  ?
  H105a  H203b  2.3762(3)  .  '3 667'  ?
  H202a  H202b  1.5514(3)  .  .  ?
  H202a  H203a  2.3696(3)  .  .  ?
  H202a  H202'b  1.59074(16)  .  .  ?
  H202a  H203'a  1.5412(2)  .  .  ?
  H202a  H203'b  2.0101(3)  .  .  ?
  H202a  H204'a  2.1851(3)  .  .  ?
  H202b  H203b  2.3838(3)  .  .  ?
  H202b  H202'a  2.2154(4)  .  .  ?
  H202b  H202'b  1.54141(16)  .  .  ?
  H202b  H203'a  1.6744(2)  .  .  ?
  H203a  H203b  1.55133(18)  .  .  ?
  H203a  H204a  2.3767(3)  .  .  ?
  H203a  H203'a  1.7854(3)  .  .  ?
  H203a  H203'b  2.1527(2)  .  .  ?
  H203a  H204'a  1.15121(17)  .  .  ?
  H203a  H204'b  1.00099(10)  .  .  ?
  H203b  H204b  2.3708(3)  .  .  ?
  H203b  H203'b  1.9497(3)  .  .  ?
  H203b  H204'a  2.1255(4)  .  .  ?
  H203b  H205'b  2.2416(4)  .  .  ?
  H204a  H204b  1.55133(19)  .  .  ?
  H204a  H205a  2.1709(4)  .  .  ?
  H204a  H204'a  1.26697(16)  .  .  ?
  H204a  H205'a  1.5871(2)  .  .  ?
  H204b  H205b  2.1455(3)  .  .  ?
  H204b  H204'a  1.9132(2)  .  .  ?
  H204b  H204'b  2.0307(2)  .  .  ?
  H204b  H205'a  2.0297(2)  .  .  ?
  H204b  H205'b  2.0386(2)  .  .  ?
  H205a  H205b  1.5513(2)  .  .  ?
  H205a  H205'b  1.6173(2)  .  .  ?
  H205b  H205'a  1.5985(2)  .  .  ?
  H202'a  H202'b  1.5515(3)  .  .  ?
  H202'a  H203'a  2.3072(3)  .  .  ?
  H202'b  H203'b  2.2870(2)  .  .  ?
  H203'a  H203'b  1.5512(2)  .  .  ?
  H203'a  H204'a  2.2926(3)  .  .  ?
  H203'a  H304a  2.2323(3)  .  4  ?
  H203'b  H204'b  2.2930(3)  .  .  ?
  H204'a  H204'b  1.5511(3)  .  .  ?
  H205'a  H205'b  1.5514(3)  .  .  ?
  H302a  H302b  1.5513(2)  .  .  ?
  H302a  H303a  2.0491(2)  .  .  ?
  H302b  H303b  2.0496(2)  .  .  ?
  H302b  H303'a  2.1479(3)  .  .  ?
  H302b  H303'b  1.5114(2)  .  .  ?
  H303a  H303b  1.5512(2)  .  .  ?
  H303a  H304a  2.3124(2)  .  .  ?
  H303a  H303'a  1.6092(2)  .  .  ?
  H303b  H304b  2.3105(3)  .  .  ?
  H303b  H303'b  1.53127(18)  .  .  ?
  H303b  H304'a  1.9549(2)  .  .  ?
  H304a  H304b  1.5511(2)  .  .  ?
  H304a  H305a  2.1287(3)  .  .  ?
  H304b  H305a  2.3756(4)  .  .  ?
  H304b  H305b  2.1215(2)  .  .  ?
  H304b  H304'a  1.09548(11)  .  .  ?
  H305a  H305b  1.55142(18)  .  .  ?
  H305b  H304'a  1.7783(2)  .  .  ?
  H305b  H304'b  1.25213(18)  .  .  ?
  H303'a  H303'b  1.55103(18)  .  .  ?
  H303'a  H304'a  2.0883(2)  .  .  ?
  H303'b  H304'b  2.0872(2)  .  .  ?
  H304'a  H304'b  1.55150(18)  .  .  ?
  H304'a  H405b  2.1773(3)  .  .  ?
  H402a  H402a  2.2781(3)  .  '3 566'  ?
  H402a  H402b  1.5514(2)  .  .  ?
  H402a  H403b  2.2897(3)  .  .  ?
  H402a  H402'a  1.09364(11)  .  .  ?
  H402a  H403'b  2.0467(2)  .  .  ?
  H402b  H403a  1.8787(2)  .  .  ?
  H402b  H402'a  2.2779(3)  .  .  ?
  H402b  H402'b  1.49222(16)  .  .  ?
  H402b  H403'a  1.6421(2)  .  .  ?
  H403a  H403b  1.5512(2)  .  .  ?
  H403a  H404a  1.9002(3)  .  .  ?
  H403a  H403'a  2.3363(3)  .  .  ?
  H403a  H403'b  1.10744(11)  .  .  ?
  H403a  H404'a  1.51162(17)  .  .  ?
  H403a  H404'b  1.51154(17)  .  .  ?
  H403b  H404b  1.8999(3)  .  .  ?
  H403b  H402'a  2.1052(3)  .  .  ?
  H403b  H403'b  2.3332(3)  .  .  ?
  H403b  H404'a  1.4386(2)  .  .  ?
  H403b  H404'b  1.4386(2)  .  .  ?
  H403b  H405'b  1.80711(19)  .  .  ?
  H404a  H404b  1.5513(2)  .  .  ?
  H404a  H405a  2.2613(4)  .  .  ?
  H404a  H403'a  2.2159(3)  .  .  ?
  H404a  H403'b  2.2900(4)  .  .  ?
  H404a  H404'a  1.16960(12)  .  .  ?
  H404a  H404'b  1.16951(12)  .  .  ?
  H404b  H405b  2.2625(3)  .  .  ?
  H404b  H404'a  1.11043(13)  .  .  ?
  H404b  H404'b  1.11052(13)  .  .  ?
  H404b  H405'a  1.4718(2)  .  .  ?
  H404b  H405'b  1.05570(13)  .  .  ?
  H405a  H405b  1.5512(2)  .  .  ?
  H405a  H403'a  1.8882(2)  .  .  ?
  H405a  H405'a  2.0294(3)  .  .  ?
  H405b  H402'a  2.1966(3)  .  .  ?
  H405b  H405'a  1.05124(11)  .  .  ?
  H405b  H405'b  2.3347(3)  .  .  ?
  H402'a  H402'b  1.55136(19)  .  .  ?
  H402'b  H403'b  2.2444(3)  .  .  ?
  H403'a  H403'b  1.5515(3)  .  .  ?
  H403'b  H404'a  2.3461(3)  .  .  ?
  H403'b  H404'b  2.3460(3)  .  .  ?
  H404'a  H405'b  1.8333(2)  .  .  ?
  H404'b  H405'b  1.8334(2)  .  .  ?
  H405'a  H405'b  1.5513(2)  .  .  ?
 
_atom_sites_solution_primary           ?
_atom_sites_solution_secondary         ?
_atom_sites_solution_hydrogens         ?
 
_geom_special_details                  ?
 
 
_cell_special_details
;      ?
;
 
_exptl_special_details
;      ?
;
 
_diffrn_special_details
;      ?
;
 
_chemical_compound_source              ?
_chemical_name_systematic              ?
_chemical_name_common                  ?
_chemical_formula_analytical           ?
_chemical_formula_structural           ?
 
_exptl_crystal_F_000                   2256
 
loop_
_diffrn_standard_refln_index_h
_diffrn_standard_refln_index_k
_diffrn_standard_refln_index_l
  ?  ?  ?
loop_
_diffrn_attenuator_code
_diffrn_attenuator_scale
  ?  ?
 
_reflns_limit_h_min                    0
_reflns_limit_h_max                    17
_reflns_limit_k_min                    0
_reflns_limit_k_max                    28
_reflns_limit_l_min                    -26
_reflns_limit_l_max                    26
_reflns_number_observed                ?
_reflns_d_resolution_high              .729
_reflns_d_resolution_low               11.064
 
_diffrn_reflns_av_sigmaI/netI          .068
_diffrn_reflns_theta_min               1.84
_diffrn_reflns_reduction_process       ?
 
_diffrn_ambient_temperature            153
_diffrn_radiation_source               'sealed tube'
_diffrn_radiation_monochromator        graphite
_diffrn_radiation_detector             'CCD area detector'
 
_refine_ls_extinction_expression       ?
_refine_ls_matrix_type                 atomblock
_refine_ls_number_restraints           20
_refine_ls_number_constraints          0
_refine_ls_R_factor_all                .1
_refine_ls_wR_factor_all               .09
_refine_ls_goodness_of_fit_all         1.486
_refine_ls_shift/su_mean               .008
 
#===END

data_global
 
_audit_creation_method                 Xtal3.6
_audit_creation_date                   99-11-11
_audit_update_record                   ?
 
#==============================================================================
#   (Publishing Staff Use Only)
 
_journal_date_recd_electronic          ?
_journal_date_to_coeditor              ?
_journal_date_from_coeditor            ?
_journal_date_accepted                 ?
_journal_date_printers_first           ?
_journal_date_printers_final           ?
_journal_date_proofs_out               ?
_journal_date_proofs_in                ?
_journal_coeditor_name                 ?
_journal_coeditor_code                 ?
_journal_coeditor_notes
; ?
;
_journal_techeditor_code               ?
_journal_techeditor_notes
; ?
;
_journal_coden_ASTM                    ?
_journal_name_full                     ?
_journal_year                          ?
_journal_volume                        ?
_journal_issue                         ?
_journal_page_first                    ?
_journal_page_last                     ?
_journal_suppl_publ_number             ?
_journal_suppl_publ_pages              ?
 
#=======================================================================
 
# 1. SUBMISSION DETAILS
#----------------------
 
_publ_contact_author_name
     'Skelton, B. W.'
_publ_contact_author_address
;
   Department of Chemistry
   University of Western Australia
   Nedlands
   Western Australia 6907
   Australia
;
_publ_contact_author_email            bws@crystal.uwa.edu.au
_publ_contact_author_fax               (+61)_08_9380_1118
_publ_contact_author_phone             (+61)_08-9380_3481
 
_publ_contact_letter
;    ?                                      #<< contact letter
;
 
_publ_requested_journal    'Inorg.Chem.'
_publ_requested_category  ?
 
_publ_section_title
;    ?                                      #<< paper title text
;
_publ_section_title_footnote
;    ?                                      #<< paper footnote text
;
 
loop_
_publ_author_name
_publ_author_footnote
_publ_author_address
 
 
'Skelton, Brian W.' .
; Department of Chemistry,
University of Western Australia,
Nedlands,
WA 6907
Australia.
;
 
 
_publ_section_synopsis
;    ?                                     #<< synopsis if FI,CI,CM,CO papers
;
_publ_section_abstract
;    ?                                     #<< abstract text
;
_publ_section_comment
;    ?                                     #<< scientific commentary text
;
 
_publ_section_exptl_prep
;    ?                        #<< material & crystal preparation text
;
 
_publ_section_exptl_refinement
;    ?                        #<< crystallographic methods used
;
 
_publ_section_acknowledgements
;    ?                                     #<< acknowledgements text
;
 
_publ_section_references
;
 Sheldrick, G M. (1996). SADABS. Pogram for Empirical Absorption Correction
  of Area Detector Data.  University of Gottingen, Germany.
 
 Siemens (1995). SMART and SAINT. Area-Detector Control and Integration
 Software. Siemens Analytical X-ray Systems Inc., Madison, Wisconsin, USA.
 
 Hall, S.R., King, G.S.D., and Stewart., J.M. (1995).
 The Xtal 3.5 User's Manual.  University of Western Australia, Lamb: Perth.
;
_publ_section_figure_captions
;    ?                                     #<< figure captions
;
 
 
#=======================================================================
#  Data block for single structure (one for each study in the paper)
#=======================================================================
 
 
data_ab34gn
 
 
# 2. EXPERIMENTAL DATA
#---------------------
 
 
_chemical_formula_sum                 'C90 H124 K2 O13 S8'
_chemical_formula_moiety               ?
_chemical_formula_weight               1748.69
_chemical_melting_point                ?
 
_symmetry_cell_setting                 orthorhombic
_symmetry_space_group_name_H-M         P_b_c_n
_symmetry_space_group_name_Hall        -p_2n_2ab
 
loop_
_symmetry_equiv_pos_as_xyz
  +x,+y,+z  1/2-x,1/2-y,1/2+z  1/2+x,1/2-y,-z  -x,+y,1/2-z  -x,-y,-z
  1/2+x,1/2+y,1/2-z  1/2-x,1/2+y,+z  +x,-y,1/2+z
 
_cell_length_a                         17.1410(10)
_cell_length_b                         17.8370(10)
_cell_length_c                         31.983(2)
_cell_angle_alpha                      90.00000
_cell_angle_beta                       90.00000
_cell_angle_gamma                      90.00000
_cell_volume                           9778.6(10)
_cell_formula_units_Z                  4
 
_exptl_crystal_density_diffrn          1.188
_exptl_crystal_density_meas            ?
_exptl_crystal_density_method          ?
_diffrn_radiation_type                'Mo K\a'
_diffrn_radiation_wavelength           .71073
 
_cell_measurement_reflns_used          802
_cell_measurement_theta_min            2.4
_cell_measurement_theta_max            26.2
_cell_measurement_temperature          153
 
_exptl_absorpt_coefficient_mu          .323
_exptl_crystal_description             prism
_exptl_crystal_size_max                0.40
_exptl_crystal_size_mid                0.34
_exptl_crystal_size_min                0.30
_exptl_crystal_size_rad                ?
_exptl_crystal_colour                  colourless
 
_diffrn_measurement_device_type
;
Bruker SMART CCD diffractometer
;
_diffrn_measurement_method             '\w scans'
_diffrn_detector_area_resol_mean       ?
 
_exptl_absorpt_correction_type         multi-scan
_exptl_absorpt_process_details
;
 SADABS; Sheldrick, 1996
;
_exptl_absorpt_correction_T_min        .684
_exptl_absorpt_correction_T_max        .928
 
_diffrn_reflns_number                  51865
_reflns_number_total                   11771
_reflns_Friedel_coverage               0
_reflns_number_gt                      9581
_reflns_threshold_expression          'F    > 4.00 sig(F   )'
 
_diffrn_reflns_theta_max               29.19
_diffrn_reflns_theta_full              ?
_diffrn_measured_fraction_theta_max    ?
_diffrn_measured_fraction_theta_full   ?
_diffrn_reflns_av_R_equivalents        .0497
_diffrn_reflns_limit_h_min             0
_diffrn_reflns_limit_h_max             20
_diffrn_reflns_limit_k_min             0
_diffrn_reflns_limit_k_max             24
_diffrn_reflns_limit_l_min             0
_diffrn_reflns_limit_l_max             42
_diffrn_standards_number               ?
_diffrn_standards_interval_count       ?
_diffrn_standards_interval_time        ? 
_diffrn_standards_decay_%              0 
 
 
_refine_ls_structure_factor_coef       F
_refine_ls_R_factor_gt                 .08
_refine_ls_wR_factor_ref               .086
_refine_ls_goodness_of_fit_ref         1.875
_refine_ls_number_reflns               9581
_refine_ls_number_parameters           585
_refine_ls_weighting_scheme            sigma
_refine_ls_weighting_details           ?
_refine_ls_hydrogen_treatment          mixed
_refine_ls_shift/su_max                .081
_refine_diff_density_min               -.654
_refine_diff_density_max               .878
 
_refine_ls_extinction_method           ?   
_refine_ls_extinction_coef             ?      
_refine_ls_abs_structure_details       ?   
_refine_ls_abs_structure_Flack         ?      
 
 
# 3. Information for the "methods" section
#-----------------------------------------
 
_computing_data_collection             'Siemens SMART (Siemens, 1995)'
_computing_cell_refinement             'Siemens SAINT (Siemens, 1995)'
_computing_data_reduction              xtal
_computing_structure_solution          xtal
_computing_structure_refinement       'xtal CRYLSQ'
_computing_molecular_graphics          xtal
_computing_publication_material       'xtal BONDLA CIFIO'
 
 
# 4. Supplementary data for validation and tables
#------------------------------------------------
 
loop_
_atom_type_symbol
_atom_type_description
_atom_type_oxidation_number
_atom_type_number_in_cell
_atom_type_scat_dispersion_real
_atom_type_scat_dispersion_imag
_atom_type_scat_source
  C  ?  0  360  .002  .002  'Int Tables Vol IV Tables 2.2B and 2.3.1'
  H  ?  0  496  0  0  'Int Tables Vol IV Tables 2.2B and 2.3.1'
  K  ?  0  8  .179  .25  'Int Tables Vol IV Tables 2.2B and 2.3.1'
  O  ?  0  52  .008  .006  'Int Tables Vol IV Tables 2.2B and 2.3.1'
  S  ?  0  32  .11  .124  'Int Tables Vol IV Tables 2.2B and 2.3.1'
 
loop_
_atom_site_label
_atom_site_fract_x
_atom_site_fract_y
_atom_site_fract_z
_atom_site_U_iso_or_equiv
_atom_site_adp_type
_atom_site_calc_flag
_atom_site_calc_attached_atom
_atom_site_occupancy
_atom_site_disorder_assembly
_atom_site_disorder_group
  K  .12741(6)  .51756(5)  .75067(3)  .0326(5)  Uani  ?  ?  1.00000  ?  ?
  O11  .14732(18)  .53386(17)  .66676(9)  .0329(16)  Uani  ?  ?  1.00000  ?  ?
  C11  .1872(2)  .4975(2)  .63619(12)  .026(2)  Uani  ?  ?  1.00000  ?  ?
  C12  .2007(2)  .5304(2)  .59717(13)  .028(2)  Uani  ?  ?  1.00000  ?  ?
  C13  .2474(2)  .4953(3)  .56813(12)  .029(2)  Uani  ?  ?  1.00000  ?  ?
  C14  .2829(3)  .4263(2)  .57581(13)  .030(2)  Uani  ?  ?  1.00000  ?  ?
  C141  .3406(3)  .3923(3)  .54411(15)  .039(3)  Uani  ?  ?  1.00000  ?  ?
  C142  .4108(4)  .4469(4)  .5393(2)  .077(5)  Uani  ?  ?  1.00000  ?  ?
  C143  .3034(4)  .3885(4)  .50117(19)  .067(4)  Uani  ?  ?  1.00000  ?  ?
  C144  .3734(5)  .3191(4)  .5571(2)  .097(6)  Uani  ?  ?  1.00000  ?  ?
  C15  .2663(3)  .3925(2)  .61417(13)  .030(2)  Uani  ?  ?  1.00000  ?  ?
  C16  .2189(2)  .4264(2)  .64394(12)  .027(2)  Uani  ?  ?  1.00000  ?  ?
  S1  .20493(6)  .38045(6)  .69321(3)  .0306(5)  Uani  ?  ?  1.00000  ?  ?
  O21  .01635(17)  .58880(17)  .63258(10)  .0327(16)  Uani  ?  ?  1.00000  ?  ?
  C21  .0076(3)  .6029(2)  .59155(13)  .029(2)  Uani  ?  ?  1.00000  ?  ?
  C22  -.0658(2)  .6056(2)  .57235(15)  .031(2)  Uani  ?  ?  1.00000  ?  ?
  C23  -.0731(3)  .6221(2)  .53010(14)  .031(2)  Uani  ?  ?  1.00000  ?  ?
  C24  -.0082(3)  .6377(2)  .50484(13)  .029(2)  Uani  ?  ?  1.00000  ?  ?
  C241  -.0167(3)  .6565(3)  .45841(14)  .034(2)  Uani  ?  ?  1.00000  ?  ?
  C242  -.0374(7)  .5902(7)  .4320(3)  .054(7)  Uani  ?  ?  .50000  ?  ?
  C243  -.0785(8)  .7193(9)  .4514(3)  .079(9)  Uani  ?  ?  .50000  ?  ?
  C244  .0586(6)  .6912(6)  .4387(3)  .046(6)  Uani  ?  ?  .50000  ?  ?
  C242'  .0041(10)  .5825(7)  .4362(3)  .070(8)  Uani  ?  ?  .50000  ?  ?
  C243'  -.1013(6)  .6746(8)  .4478(3)  .060(7)  Uani  ?  ?  .50000  ?  ?
  C244'  .0334(7)  .7190(7)  .4472(4)  .057(7)  Uani  ?  ?  .50000  ?  ?
  C25  .0644(3)  .6339(2)  .52401(14)  .029(2)  Uani  ?  ?  1.00000  ?  ?
  C26  .0733(2)  .6170(2)  .56659(13)  .028(2)  Uani  ?  ?  1.00000  ?  ?
  S2  .16898(6)  .62492(6)  .58802(4)  .0305(5)  Uani  ?  ?  1.00000  ?  ?
  O31  -.07371(16)  .50048(16)  .66732(9)  .0280(15)  Uani  ?  ?  1.00000  ?  ?
  C31  -.1297(2)  .4660(2)  .64520(12)  .025(2)  Uani  ?  ?  1.00000  ?  ?
  C32  -.1520(2)  .3915(2)  .65452(12)  .025(2)  Uani  ?  ?  1.00000  ?  ?
  C33  -.2114(3)  .3568(2)  .63161(13)  .029(2)  Uani  ?  ?  1.00000  ?  ?
  C34  -.2509(3)  .3929(2)  .59891(13)  .031(2)  Uani  ?  ?  1.00000  ?  ?
  C341  -.3154(3)  .3526(3)  .57451(15)  .041(3)  Uani  ?  ?  1.00000  ?  ?
  C342  -.2792(4)  .2822(4)  .5517(2)  .051(4)  Uani  ?  ?  .771(5)  ?  ?
  C343  -.3784(4)  .3195(4)  .6044(2)  .054(4)  Uani  ?  ?  .771(5)  ?  ?
  C344  -.3554(5)  .3988(4)  .5417(3)  .062(5)  Uani  ?  ?  .771(5)  ?  ?
  C342'  -.2921(16)  .3612(15)  .5299(8)  .056(6)  Uiso  ?  ?  .229(5)  ?  ?
  C343'  -.3318(15)  .2845(14)  .5901(8)  .053(6)  Uiso  ?  ?  .229(5)  ?  ?
  C344'  -.3897(15)  .4128(14)  .5814(8)  .051(6)  Uiso  ?  ?  .229(5)  ?  ?
  C35  -.2283(3)  .4664(3)  .59041(14)  .034(2)  Uani  ?  ?  1.00000  ?  ?
  C36  -.1691(2)  .5025(2)  .61265(14)  .029(2)  Uani  ?  ?  1.00000  ?  ?
  S3  -.15335(7)  .59990(6)  .60312(4)  .0369(6)  Uani  ?  ?  1.00000  ?  ?
  O41  .03800(18)  .42963(16)  .70292(9)  .0325(16)  Uani  ?  ?  1.00000  ?  ?
  C41  .0442(3)  .3569(2)  .69114(12)  .027(2)  Uani  ?  ?  1.00000  ?  ?
  C42  .1185(2)  .3260(2)  .68474(12)  .028(2)  Uani  ?  ?  1.00000  ?  ?
  C43  .1254(3)  .2514(3)  .67364(15)  .037(2)  Uani  ?  ?  1.00000  ?  ?
  C44  .0604(3)  .2053(3)  .66799(17)  .043(3)  Uani  ?  ?  1.00000  ?  ?
  C441  .0702(4)  .1219(3)  .6563(3)  .076(5)  Uani  ?  ?  1.00000  ?  ?
  C442  .1421(10)  .0849(7)  .6769(5)  .102(11)  Uani  ?  ?  .561(6)  ?  ?
  C443  .1147(8)  .1269(7)  .6048(5)  .088(10)  Uani  ?  ?  .561(6)  ?  ?
  C444  .0041(9)  .0812(7)  .6453(8)  .154(15)  Uani  ?  ?  .561(6)  ?  ?
  C442'  .0497(8)  .0767(7)  .7016(4)  .049(3)  Uiso  ?  ?  .439(6)  ?  ?
  C443'  .1417(10)  .1002(9)  .6428(5)  .070(4)  Uiso  ?  ?  .439(6)  ?  ?
  C444'  .0034(7)  .0976(6)  .6279(4)  .044(3)  Uiso  ?  ?  .439(6)  ?  ?
  C45  -.0126(3)  .2369(2)  .67501(15)  .036(2)  Uani  ?  ?  1.00000  ?  ?
  C46  -.0218(2)  .3114(2)  .68616(11)  .025(2)  Uani  ?  ?  1.00000  ?  ?
  S4  -.11655(6)  .34436(6)  .69955(3)  .0275(5)  Uani  ?  ?  1.00000  ?  ?
  C1  .3258(5)  .4563(7)  .7834(3)  .115(7)  Uani  ?  ?  1.00000  ?  ?
  C2  .3221(4)  .5312(8)  .8012(2)  .140(8)  Uani  ?  ?  1.00000  ?  ?
  O3  .2627(3)  .5757(3)  .78038(15)  .091(4)  Uani  ?  ?  1.00000  ?  ?
  C4  .2670(6)  .6546(7)  .7902(4)  .160(10)  Uani  ?  ?  1.00000  ?  ?
  C5  .2033(6)  .6955(6)  .7691(5)  .165(11)  Uani  ?  ?  1.00000  ?  ?
  O0  .00000  .6143(3)  .75001  .051(3)  Uani  ?  ?  1.00000  ?  ?
  O01  -.0037(4)  .7139(3)  .68287(17)  .062(4)  Uani  ?  ?  .697(6)  ?  ?
  C01  .0639(9)  .7912(15)  .6921(6)  .25(2)  Uani  ?  ?  .697(6)  ?  ?
  O01'  .0507(9)  .7592(8)  .6714(4)  .065(4)  Uiso  ?  ?  .303(6)  ?  ?
  C01'  .0519(10)  .8385(9)  .6855(5)  .041(4)  Uiso  ?  ?  .303(6)  ?  ?
  H11  .112(4)  .565(4)  .659(2)  .11(3)  Uiso  ?  ?  1.00000  ?  ?
  H13  .25645  .51918  .54129  .03800  Uiso  ?  ?  1.00000  ?  ?
  H142a  .43724  .45252  .56585  .11300  Uiso  ?  ?  1.00000  ?  ?
  H142b  .39293  .49568  .53107  .11300  Uiso  ?  ?  1.00000  ?  ?
  H142c  .44723  .42931  .51941  .11300  Uiso  ?  ?  1.00000  ?  ?
  H143a  .33660  .36231  .48185  .10200  Uiso  ?  ?  1.00000  ?  ?
  H143b  .29393  .43746  .49041  .10200  Uiso  ?  ?  1.00000  ?  ?
  H143c  .25476  .36213  .50257  .10200  Uiso  ?  ?  1.00000  ?  ?
  H144a  .41273  .30246  .53772  .13300  Uiso  ?  ?  1.00000  ?  ?
  H144b  .33367  .28182  .55832  .13300  Uiso  ?  ?  1.00000  ?  ?
  H144c  .39733  .32286  .58414  .13300  Uiso  ?  ?  1.00000  ?  ?
  H15  .28882  .34417  .62021  .03900  Uiso  ?  ?  1.00000  ?  ?
  H21  -.011(4)  .562(3)  .6467(18)  .07(2)  Uiso  ?  ?  1.00000  ?  ?
  H23  -.12438  .62311  .51770  .04100  Uiso  ?  ?  1.00000  ?  ?
  H242a  -.03664  .60268  .40298  .06500  Uiso  ?  ?  .50000  ?  ?
  H242b  -.08650  .57037  .43923  .06500  Uiso  ?  ?  .50000  ?  ?
  H242c  .00149  .55078  .43611  .06500  Uiso  ?  ?  .50000  ?  ?
  H243a  -.08972  .72693  .42260  .07100  Uiso  ?  ?  .50000  ?  ?
  H243b  -.06198  .76598  .46331  .07100  Uiso  ?  ?  .50000  ?  ?
  H243c  -.12756  .70613  .46511  .07100  Uiso  ?  ?  .50000  ?  ?
  H244a  .05157  .70077  .40955  .05800  Uiso  ?  ?  .50000  ?  ?
  H244b  .10207  .65842  .44214  .05800  Uiso  ?  ?  .50000  ?  ?
  H244c  .07098  .73813  .45210  .05800  Uiso  ?  ?  .50000  ?  ?
  H242'a  .00112  .58580  .40663  .06500  Uiso  ?  ?  .50000  ?  ?
  H242'b  -.03169  .54225  .44476  .06500  Uiso  ?  ?  .50000  ?  ?
  H242'c  .05556  .56526  .44365  .06500  Uiso  ?  ?  .50000  ?  ?
  H243'a  -.10645  .68576  .41846  .07100  Uiso  ?  ?  .50000  ?  ?
  H243'b  -.11672  .72039  .46262  .07100  Uiso  ?  ?  .50000  ?  ?
  H243'c  -.13504  .63624  .45528  .07100  Uiso  ?  ?  .50000  ?  ?
  H244'a  .02567  .73541  .41932  .05800  Uiso  ?  ?  .50000  ?  ?
  H244'b  .08854  .70396  .44948  .05800  Uiso  ?  ?  .50000  ?  ?
  H244'c  .02685  .76050  .46576  .05800  Uiso  ?  ?  .50000  ?  ?
  H25  .11039  .64286  .50734  .03600  Uiso  ?  ?  1.00000  ?  ?
  H33  -.22553  .30623  .63839  .03600  Uiso  ?  ?  1.00000  ?  ?
  H342a  -.31796  .25557  .53630  .07000  Uiso  ?  ?  .771(5)  ?  ?
  H342b  -.25620  .24859  .57154  .07000  Uiso  ?  ?  .771(5)  ?  ?
  H342c  -.23903  .29759  .53254  .07000  Uiso  ?  ?  .771(5)  ?  ?
  H343a  -.41779  .29470  .58870  .07700  Uiso  ?  ?  .771(5)  ?  ?
  H343b  -.40052  .35785  .62073  .07700  Uiso  ?  ?  .771(5)  ?  ?
  H343c  -.35423  .28320  .62263  .07700  Uiso  ?  ?  .771(5)  ?  ?
  H344a  -.39669  .37126  .52920  .09400  Uiso  ?  ?  .771(5)  ?  ?
  H344b  -.31845  .41185  .52015  .09400  Uiso  ?  ?  .771(5)  ?  ?
  H344c  -.37510  .44349  .55359  .09400  Uiso  ?  ?  .771(5)  ?  ?
  H342'a  -.32842  .33801  .51156  .05200  Uiso  ?  ?  .229(5)  ?  ?
  H342'b  -.24157  .33690  .52521  .05200  Uiso  ?  ?  .229(5)  ?  ?
  H342'c  -.28624  .41239  .52257  .09400  Uiso  ?  ?  .229(5)  ?  ?
  H343'a  -.37650  .26561  .57403  .04300  Uiso  ?  ?  .229(5)  ?  ?
  H343'b  -.34613  .28901  .61782  .07700  Uiso  ?  ?  .229(5)  ?  ?
  H343'c  -.28973  .25263  .58577  .07000  Uiso  ?  ?  .229(5)  ?  ?
  H344'a  -.43406  .39631  .56401  .04500  Uiso  ?  ?  .229(5)  ?  ?
  H344'b  -.37554  .46135  .57128  .04500  Uiso  ?  ?  .229(5)  ?  ?
  H344'c  -.40573  .41478  .60891  .04500  Uiso  ?  ?  .229(5)  ?  ?
  H35  -.25476  .49317  .56852  .04300  Uiso  ?  ?  1.00000  ?  ?
  H41  .001(3)  .450(3)  .6911(15)  .041(14)  Uiso  ?  ?  1.00000  ?  ?
  H43  .17663  .23018  .66960  .04800  Uiso  ?  ?  1.00000  ?  ?
  H442a  .14277  .03346  .67000  .41500  Uiso  ?  ?  .561(6)  ?  ?
  H442b  .13346  .08824  .70733  .41500  Uiso  ?  ?  .561(6)  ?  ?
  H442c  .18650  .10961  .66989  .41500  Uiso  ?  ?  .561(6)  ?  ?
  H443a  .12153  .07644  .59472  .30800  Uiso  ?  ?  .561(6)  ?  ?
  H443b  .16562  .14858  .60800  .30800  Uiso  ?  ?  .561(6)  ?  ?
  H443c  .08425  .15449  .58703  .30800  Uiso  ?  ?  .561(6)  ?  ?
  H444a  .01591  .03231  .63746  .15800  Uiso  ?  ?  .561(6)  ?  ?
  H444b  -.02105  .10618  .62126  .15800  Uiso  ?  ?  .561(6)  ?  ?
  H444c  -.03304  .08201  .66741  .15800  Uiso  ?  ?  .561(6)  ?  ?
  H442'a  .05910  .02487  .69926  .05000  Uiso  ?  ?  .439(6)  ?  ?
  H442'b  -.00499  .08399  .70855  .05000  Uiso  ?  ?  .439(6)  ?  ?
  H442'c  .07979  .09713  .72387  .05000  Uiso  ?  ?  .439(6)  ?  ?
  H443'a  .14296  .04656  .64058  .09300  Uiso  ?  ?  .439(6)  ?  ?
  H443'b  .17720  .10875  .66910  .09300  Uiso  ?  ?  .439(6)  ?  ?
  H443'c  .16096  .12522  .62227  .09300  Uiso  ?  ?  .439(6)  ?  ?
  H444'a  .01063  .04535  .62050  .04500  Uiso  ?  ?  .439(6)  ?  ?
  H444'b  .00470  .12600  .60262  .04500  Uiso  ?  ?  .439(6)  ?  ?
  H444'c  -.04448  .10335  .64133  .04500  Uiso  ?  ?  .439(6)  ?  ?
  H45  -.05800  .20572  .67218  .04500  Uiso  ?  ?  1.00000  ?  ?
  H1a  .36490  .42526  .79708  .16500  Uiso  ?  ?  1.00000  ?  ?
  H1b  .33872  .45661  .75408  .16500  Uiso  ?  ?  1.00000  ?  ?
  H1c  .27685  .42983  .78617  .16500  Uiso  ?  ?  1.00000  ?  ?
  H2a  .37191  .55473  .79776  .17500  Uiso  ?  ?  1.00000  ?  ?
  H2b  .31057  .52777  .83010  .17500  Uiso  ?  ?  1.00000  ?  ?
  H4a  .31587  .67601  .78176  .17500  Uiso  ?  ?  1.00000  ?  ?
  H4b  .26117  .66321  .81974  .17500  Uiso  ?  ?  1.00000  ?  ?
  H5a  .20520  .74727  .77575  .21900  Uiso  ?  ?  1.00000  ?  ?
  H5b  .15529  .67472  .77648  .21900  Uiso  ?  ?  1.00000  ?  ?
  H5c  .21095  .69028  .73925  .21900  Uiso  ?  ?  1.00000  ?  ?
  H0  .00753  .64967  .72700  .07900  Uiso  ?  ?  1.00000  ?  ?
  H01  -.05511  .70957  .68109  .07900  Uiso  ?  ?  .697(6)  ?  ?
  H01a  .03498  .83258  .71135  .28400  Uiso  ?  ?  .697(6)  ?  ?
  H01b  .07430  .82215  .66803  .28400  Uiso  ?  ?  .697(6)  ?  ?
  H01c  .10784  .78157  .70700  .28400  Uiso  ?  ?  .697(6)  ?  ?
  H01'  .02072  .76322  .65409  .07900  Uiso  ?  ?  .303(6)  ?  ?
  H01'a  .03457  .83838  .71386  .28400  Uiso  ?  ?  .303(6)  ?  ?
  H01'b  .01557  .86589  .66899  .28400  Uiso  ?  ?  .303(6)  ?  ?
  H01'c  .10394  .85784  .68422  .28400  Uiso  ?  ?  .303(6)  ?  ?
 
loop_
_atom_site_aniso_label
_atom_site_aniso_U_11
_atom_site_aniso_U_22
_atom_site_aniso_U_33
_atom_site_aniso_U_12
_atom_site_aniso_U_13
_atom_site_aniso_U_23
  K  .0327(5)  .0378(5)  .0272(4)  -.0061(4)  .0003(4)  -.0027(4)
  O11  .0346(18)  .0374(16)  .0267(14)  .0033(13)  .0027(12)  .0019(12)
  C11  .019(2)  .029(2)  .030(2)  -.0042(15)  -.0026(15)  .0022(16)
  C12  .024(2)  .027(2)  .033(2)  -.0040(16)  -.0008(16)  .0040(16)
  C13  .023(2)  .038(2)  .0276(19)  .0001(17)  -.0012(16)  .0044(17)
  C14  .028(2)  .035(2)  .028(2)  .0032(17)  .0021(16)  -.0012(17)
  C141  .035(3)  .045(3)  .037(2)  .010(2)  .004(2)  -.001(2)
  C142  .038(4)  .099(5)  .093(5)  -.003(3)  .028(3)  -.034(4)
  C143  .065(4)  .087(5)  .049(3)  .024(4)  .002(3)  -.013(3)
  C144  .147(8)  .081(5)  .062(4)  .071(5)  .051(5)  .023(4)
  C15  .026(2)  .031(2)  .034(2)  .0002(17)  -.0004(17)  .0028(17)
  C16  .021(2)  .032(2)  .0273(19)  -.0034(16)  -.0019(15)  .0068(16)
  S1  .0274(6)  .0362(6)  .0281(5)  -.0019(4)  -.0030(4)  .0085(4)
  O21  .0263(17)  .0331(16)  .0389(16)  -.0018(12)  .0044(13)  .0084(13)
  C21  .029(2)  .0209(18)  .038(2)  -.0002(16)  .0044(17)  .0027(16)
  C22  .022(2)  .0193(18)  .052(3)  .0009(15)  .0023(18)  .0052(17)
  C23  .028(2)  .0191(18)  .046(2)  .0011(16)  -.0034(18)  -.0005(17)
  C24  .029(2)  .0225(18)  .034(2)  .0005(16)  -.0006(17)  -.0050(16)
  C241  .029(2)  .039(2)  .035(2)  .0002(18)  .0039(17)  -.0081(19)
  C242  .059(7)  .059(7)  .044(6)  -.010(6)  -.026(5)  -.004(5)
  C243  .086(10)  .112(11)  .039(6)  .072(9)  .029(6)  .030(7)
  C244  .047(6)  .060(7)  .030(5)  -.012(5)  -.012(4)  .007(4)
  C242'  .121(12)  .059(7)  .030(5)  .014(8)  .014(7)  -.019(5)
  C243'  .035(6)  .109(11)  .036(5)  -.008(6)  -.011(4)  .010(6)
  C244'  .042(7)  .061(7)  .069(7)  -.019(5)  -.014(5)  .029(6)
  C25  .027(2)  .0212(18)  .040(2)  -.0004(16)  .0020(17)  -.0014(16)
  C26  .022(2)  .0227(19)  .038(2)  -.0009(15)  -.0009(16)  .0002(16)
  S2  .0218(5)  .0274(5)  .0423(6)  -.0023(4)  .0004(4)  .0079(4)
  O31  .0263(16)  .0271(14)  .0305(14)  -.0051(12)  .0056(12)  -.0005(11)
  C31  .021(2)  .0263(19)  .0290(19)  .0003(15)  .0079(15)  .0018(15)
  C32  .023(2)  .0249(18)  .0257(18)  .0008(15)  .0020(15)  .0010(15)
  C33  .030(2)  .028(2)  .028(2)  -.0033(16)  .0025(16)  .0033(16)
  C34  .027(2)  .030(2)  .035(2)  -.0023(17)  .0014(17)  .0045(17)
  C341  .030(3)  .052(3)  .039(2)  -.010(2)  -.011(2)  .012(2)
  C342  .049(4)  .053(4)  .050(4)  -.019(3)  -.009(3)  -.011(3)
  C343  .040(4)  .063(5)  .060(4)  -.022(3)  .001(3)  .006(4)
  C344  .058(5)  .058(5)  .069(5)  -.024(4)  -.033(4)  .025(4)
  C35  .025(2)  .038(2)  .040(2)  -.0002(18)  .0016(18)  .015(2)
  C36  .017(2)  .028(2)  .042(2)  .0003(15)  .0034(16)  .0103(17)
  S3  .0216(6)  .0278(5)  .0613(7)  .0026(4)  .0073(5)  .0144(5)
  O41  .0329(17)  .0313(15)  .0331(15)  -.0002(13)  .0005(13)  -.0040(12)
  C41  .034(2)  .028(2)  .0190(17)  -.0002(16)  -.0003(15)  .0033(15)
  C42  .026(2)  .029(2)  .028(2)  -.0033(16)  -.0006(16)  .0065(16)
  C43  .029(2)  .032(2)  .051(3)  .0046(18)  .003(2)  .008(2)
  C44  .040(3)  .026(2)  .064(3)  .001(2)  .000(2)  .003(2)
  C441  .056(4)  .034(3)  .140(7)  .007(3)  -.019(4)  -.015(4)
  C442  .128(13)  .045(7)  .133(14)  .047(8)  -.021(11)  -.007(8)
  C443  .065(9)  .061(7)  .139(13)  .002(6)  .021(8)  -.042(8)
  C444  .092(11)  .048(7)  .32(3)  -.032(7)  .131(15)  -.080(12)
  C45  .032(3)  .028(2)  .050(3)  -.0036(18)  -.000(2)  .0061(19)
  C46  .027(2)  .028(2)  .0203(17)  -.0013(16)  -.0010(15)  .0062(15)
  S4  .0285(6)  .0302(5)  .0239(4)  -.0040(4)  .0016(4)  .0059(4)
  C1  .057(5)  .213(11)  .075(5)  -.033(6)  -.003(4)  .052(6)
  C2  .046(5)  .313(16)  .060(5)  -.046(7)  -.004(4)  -.040(7)
  O3  .064(3)  .139(5)  .070(3)  -.052(3)  .000(2)  -.023(3)
  C4  .109(8)  .183(11)  .187(11)  -.089(8)  .054(8)  -.121(9)
  C5  .094(8)  .091(7)  .308(18)  -.040(6)  -.003(9)  -.046(9)
  O0  .051(3)  .043(3)  .061(3)  .00000  .009(3)  .00000
  O01  .105(5)  .035(3)  .047(3)  -.007(3)  .023(3)  .003(2)
  C01  .089(11)  .46(4)  .208(19)  -.144(17)  -.069(12)  .24(2)
 
 
# 5. Molecular Geometry
#----------------------
 
loop_
_geom_bond_atom_site_label_1
_geom_bond_atom_site_label_2
_geom_bond_site_symmetry_1
_geom_bond_site_symmetry_2
_geom_bond_distance
_geom_bond_publ_flag                 #<< enter YES for value to be published
  K  O11  .  .  2.721(3)  ?
  K  O41  .  .  2.672(3)  ?
  K  O3  .  .  2.713(5)  ?
  K  O0  .  .  2.783(3)  ?
  K  O31  .  '4 556'  2.797(3)  ?
  O11  C11  .  .  1.358(5)  ?
  O11  H11  .  .  .85(7)  ?
  C11  C12  .  .  1.398(6)  ?
  C11  C16  .  .  1.403(6)  ?
  C12  C13  .  .  1.376(6)  ?
  C12  S2  .  .  1.795(4)  ?
  C13  C14  .  .  1.396(6)  ?
  C13  H13  .  .  .971(4)  ?
  C14  C141  .  .  1.540(6)  ?
  C14  C15  .  .  1.396(6)  ?
  C141  C142  .  .  1.555(8)  ?
  C141  C143  .  .  1.516(8)  ?
  C141  C144  .  .  1.482(9)  ?
  C142  H142a  .  .  .969(7)  ?
  C142  H142b  .  .  .959(8)  ?
  C142  H142c  .  .  .945(7)  ?
  C143  H143a  .  .  .961(7)  ?
  C143  H143b  .  .  .953(7)  ?
  C143  H143c  .  .  .958(7)  ?
  C144  H144a  .  .  .963(8)  ?
  C144  H144b  .  .  .953(9)  ?
  C144  H144c  .  .  .958(7)  ?
  C15  C16  .  .  1.390(6)  ?
  C15  H15  .  .  .964(4)  ?
  C16  S1  .  .  1.792(4)  ?
  S1  C42  .  .  1.792(4)  ?
  O21  C21  .  .  1.344(5)  ?
  O21  H21  .  .  .81(6)  ?
  C21  C22  .  .  1.400(6)  ?
  C21  C26  .  .  1.404(6)  ?
  C22  C23  .  .  1.389(7)  ?
  C22  S3  .  .  1.798(5)  ?
  C23  C24  .  .  1.403(6)  ?
  C23  H23  .  .  .964(4)  ?
  C24  C241  .  .  1.529(6)  ?
  C24  C25  .  .  1.388(6)  ?
  C241  C242  .  .  1.497(12)  ?
  C241  C243  .  .  1.557(15)  ?
  C241  C244  .  .  1.564(12)  ?
  C241  C242'  .  .  1.541(13)  ?
  C241  C243'  .  .  1.523(12)  ?
  C241  C244'  .  .  1.451(13)  ?
  C242  C242'  .  .  .74(2)  ?
  C242  C243'  .  .  1.929(18)  ?
  C242  H242a  .  .  .954(11)  ?
  C242  H242b  .  .  .942(12)  ?
  C242  H242c  .  .  .977(12)  ?
  C242  H242'a  .  .  1.048(11)  ?
  C242  H242'b  .  .  .953(12)  ?
  C243  C243'  .  .  .90(2)  ?
  C243  C244'  .  .  1.923(18)  ?
  C243  H243a  .  .  .952(11)  ?
  C243  H243b  .  .  .958(15)  ?
  C243  H243c  .  .  .976(14)  ?
  C243  H243'a  .  .  1.304(13)  ?
  C243  H243'b  .  .  .746(14)  ?
  C244  C244'  .  .  .712(16)  ?
  C244  H244a  .  .  .956(9)  ?
  C244  H244b  .  .  .953(11)  ?
  C244  H244c  .  .  .964(11)  ?
  C244  H244'a  .  .  1.152(11)  ?
  C244  H244'b  .  .  .658(11)  ?
  C242'  H242a  .  .  1.323(13)  ?
  C242'  H242c  .  .  .567(12)  ?
  C242'  H242'a  .  .  .950(11)  ?
  C242'  H242'b  .  .  .983(14)  ?
  C242'  H242'c  .  .  .963(16)  ?
  C243'  H243a  .  .  1.250(13)  ?
  C243'  H243c  .  .  .909(13)  ?
  C243'  H243'a  .  .  .964(11)  ?
  C243'  H243'b  .  .  .981(14)  ?
  C243'  H243'c  .  .  .926(13)  ?
  C244'  H244a  .  .  1.287(12)  ?
  C244'  H244c  .  .  .746(12)  ?
  C244'  H244'a  .  .  .949(12)  ?
  C244'  H244'b  .  .  .985(11)  ?
  C244'  H244'c  .  .  .955(12)  ?
  C25  C26  .  .  1.403(6)  ?
  C25  H25  .  .  .965(4)  ?
  C26  S2  .  .  1.783(4)  ?
  O31  C31  .  .  1.342(5)  ?
  C31  C32  .  .  1.414(5)  ?
  C31  C36  .  .  1.402(6)  ?
  C32  C33  .  .  1.398(6)  ?
  C32  S4  .  .  1.775(4)  ?
  C33  C34  .  .  1.402(6)  ?
  C33  H33  .  .  .959(4)  ?
  C34  C341  .  .  1.532(7)  ?
  C34  C35  .  .  1.394(6)  ?
  C341  C342  .  .  1.580(9)  ?
  C341  C343  .  .  1.560(9)  ?
  C341  C344  .  .  1.499(9)  ?
  C341  C342'  .  .  1.49(3)  ?
  C341  C343'  .  .  1.34(3)  ?
  C341  C344'  .  .  1.68(3)  ?
  C342  C342'  .  .  1.59(3)  ?
  C342  C343'  .  .  1.52(3)  ?
  C342  H342a  .  .  .953(7)  ?
  C342  H342b  .  .  .959(7)  ?
  C342  H342c  .  .  .961(7)  ?
  C342  H342'b  .  .  1.443(7)  ?
  C342  H343'c  .  .  1.225(7)  ?
  C343  C343'  .  .  1.11(3)  ?
  C343  C344'  .  .  1.83(3)  ?
  C343  H343a  .  .  .950(8)  ?
  C343  H343b  .  .  .940(8)  ?
  C343  H343c  .  .  .964(8)  ?
  C343  H343'a  .  .  1.367(8)  ?
  C343  H343'b  .  .  .886(8)  ?
  C344  C342'  .  .  1.33(3)  ?
  C344  C344'  .  .  1.42(3)  ?
  C344  H344a  .  .  .950(8)  ?
  C344  H344b  .  .  .965(8)  ?
  C344  H344c  .  .  .946(8)  ?
  C344  H342'c  .  .  1.356(8)  ?
  C342'  H342c  .  .  1.46(3)  ?
  C342'  H344b  .  .  1.06(3)  ?
  C342'  H342'a  .  .  .95(3)  ?
  C342'  H342'b  .  .  .98(3)  ?
  C342'  H342'c  .  .  .95(3)  ?
  C343'  H343a  .  .  1.49(3)  ?
  C343'  H343c  .  .  1.11(3)  ?
  C343'  H343'a  .  .  .98(3)  ?
  C343'  H343'b  .  .  .92(3)  ?
  C343'  H343'c  .  .  .93(3)  ?
  C344'  H344c  .  .  1.07(2)  ?
  C344'  H344'a  .  .  .99(3)  ?
  C344'  H344'b  .  .  .96(2)  ?
  C344'  H344'c  .  .  .92(2)  ?
  C35  C36  .  .  1.396(6)  ?
  C35  H35  .  .  .962(4)  ?
  C36  S3  .  .  1.784(4)  ?
  O41  C41  .  .  1.355(5)  ?
  O41  H41  .  .  .83(5)  ?
  C41  C42  .  .  1.404(6)  ?
  C41  C46  .  .  1.401(6)  ?
  C42  C43  .  .  1.381(6)  ?
  C43  C44  .  .  1.396(7)  ?
  C43  H43  .  .  .966(5)  ?
  C44  C441  .  .  1.544(8)  ?
  C44  C45  .  .  1.390(7)  ?
  C441  C442  .  .  1.545(18)  ?
  C441  C443  .  .  1.816(18)  ?
  C441  C444  .  .  1.392(17)  ?
  C441  C442'  .  .  1.694(15)  ?
  C441  C443'  .  .  1.356(18)  ?
  C441  C444'  .  .  1.524(14)  ?
  C442  C442'  .  .  1.78(2)  ?
  C442  C443'  .  .  1.12(2)  ?
  C442  H442a  .  .  .944(13)  ?
  C442  H442b  .  .  .987(17)  ?
  C442  H442c  .  .  .907(16)  ?
  C442  H443'a  .  .  1.347(16)  ?
  C442  H443'b  .  .  .777(16)  ?
  C443  C443'  .  .  1.38(2)  ?
  C443  H443a  .  .  .963(13)  ?
  C443  H443b  .  .  .960(13)  ?
  C443  H443c  .  .  .916(14)  ?
  C443  H443'c  .  .  .970(14)  ?
  C444  C442'  .  .  1.96(3)  ?
  C444  C444'  .  .  .63(3)  ?
  C444  H444a  .  .  .929(14)  ?
  C444  H444b  .  .  .99(2)  ?
  C444  H444c  .  .  .95(2)  ?
  C444  H444'a  .  .  1.02(2)  ?
  C444  H444'c  .  .  .930(15)  ?
  C442'  H442b  .  .  1.463(13)  ?
  C442'  H442'a  .  .  .942(13)  ?
  C442'  H442'b  .  .  .972(13)  ?
  C442'  H442'c  .  .  .953(13)  ?
  C443'  H442a  .  .  1.476(16)  ?
  C443'  H442c  .  .  1.171(16)  ?
  C443'  H443b  .  .  1.466(16)  ?
  C443'  H443'a  .  .  .960(16)  ?
  C443'  H443'b  .  .  1.050(16)  ?
  C443'  H443'c  .  .  .859(16)  ?
  C444'  H444a  .  .  1.224(12)  ?
  C444'  H444b  .  .  .493(12)  ?
  C444'  H444c  .  .  1.437(12)  ?
  C444'  H444'a  .  .  .970(12)  ?
  C444'  H444'b  .  .  .954(12)  ?
  C444'  H444'c  .  .  .932(12)  ?
  C45  C46  .  .  1.384(6)  ?
  C45  H45  .  .  .962(5)  ?
  C46  S4  .  .  1.780(4)  ?
  C1  C2  .  .  1.453(18)  ?
  C1  H1a  .  .  .974(9)  ?
  C1  H1b  .  .  .963(8)  ?
  C1  H1c  .  .  .967(9)  ?
  C2  O3  .  .  1.452(11)  ?
  C2  H2a  .  .  .957(9)  ?
  C2  H2b  .  .  .949(8)  ?
  O3  C4  .  .  1.444(14)  ?
  C4  C5  .  .  1.478(16)  ?
  C4  H4a  .  .  .959(11)  ?
  C4  H4b  .  .  .961(12)  ?
  C5  H5a  .  .  .949(11)  ?
  C5  H5b  .  .  .933(11)  ?
  C5  H5c  .  .  .967(16)  ?
  O0  H0  .  .  .978(3)  ?
  O0  H0  .  '4 556'  .978(3)  ?
  O01  C01  .  .  1.83(2)  ?
  O01  O01'  .  .  1.288(16)  ?
  O01  H01  .  .  .886(7)  ?
  O01  H01'  .  .  1.340(5)  ?
  C01  O01'  .  .  .90(3)  ?
  C01  C01'  .  .  .89(3)  ?
  C01  H01a  .  .  1.08(2)  ?
  C01  H01b  .  .  .96(2)  ?
  C01  H01c  .  .  .908(17)  ?
  C01  H01'a  .  .  1.20(2)  ?
  C01  H01'c  .  .  1.39(2)  ?
  O01'  C01'  .  .  1.48(2)  ?
  O01'  H01b  .  .  1.198(15)  ?
  O01'  H01'  .  .  .758(14)  ?
  C01'  H01a  .  .  .883(16)  ?
  C01'  H01b  .  .  .737(16)  ?
  C01'  H01'a  .  .  .955(16)  ?
  C01'  H01'b  .  .  .951(17)  ?
  C01'  H01'c  .  .  .958(17)  ?
  H242a  H242'a  .  .  .72333(3)  ?
  H242c  H242'b  .  .  .65050(3)  ?
  H242c  H242'c  .  .  .99189(5)  ?
  H243a  H243'a  .  .  .79940(4)  ?
  H243c  H243'b  .  .  .324906(13)  ?
  H244a  H244'a  .  .  .82250(3)  ?
  H244b  H244'b  .  .  .87677(4)  ?
  H244c  H244'b  .  .  .68491(3)  ?
  H244c  H244'c  .  .  .96035(4)  ?
  H342b  H343'c  .  .  .73665(3)  ?
  H342c  H342'b  .  .  .74061(4)  ?
  H343a  H343'a  .  .  .99513(4)  ?
  H343c  H343'b  .  .  .231695(8)  ?
  H344b  H342'c  .  .  .55759(3)  ?
  H344c  H344'b  .  .  .64935(3)  ?
  H442a  H443'a  .  .  .96952(6)  ?
  H442c  H443'b  .  .  .162129(9)  ?
  H443b  H443'c  .  .  .62313(3)  ?
  H444a  H444'a  .  .  .59709(3)  ?
  H444b  H444'b  .  .  .82171(3)  ?
  H444b  H444'c  .  .  .75887(4)  ?
  H444c  H444'c  .  .  .93760(5)  ?
  H01a  H01'a  .  .  .131135(6)  ?
  H01b  H01'c  .  .  .96515(3)  ?
 
loop_
_geom_angle_atom_site_label_1
_geom_angle_atom_site_label_2
_geom_angle_atom_site_label_3
_geom_angle_site_symmetry_1
_geom_angle_site_symmetry_2
_geom_angle_site_symmetry_3
_geom_angle
_geom_angle_publ_flag                #<< enter YES for value to be published
  O11  K  O41  .  .  .  64.59(9)  ?
  O11  K  O3  .  .  .  101.38(12)  ?
  O11  K  O0  .  .  .  91.42(7)  ?
  O11  K  O31  .  .  '4 556'  167.98(10)  ?
  O41  K  O3  .  .  .  156.21(13)  ?
  O41  K  O0  .  .  .  84.80(10)  ?
  O41  K  O31  .  .  '4 556'  106.46(9)  ?
  O3  K  O0  .  .  .  115.88(15)  ?
  O3  K  O31  .  .  '4 556'  89.69(12)  ?
  O0  K  O31  .  .  '4 556'  79.42(7)  ?
  K  O11  C11  .  .  .  136.2(2)  ?
  K  O11  H11  .  .  .  105(5)  ?
  C11  O11  H11  .  .  .  117(5)  ?
  O11  C11  C12  .  .  .  121.7(4)  ?
  O11  C11  C16  .  .  .  120.0(4)  ?
  C12  C11  C16  .  .  .  118.3(4)  ?
  C11  C12  C13  .  .  .  120.5(4)  ?
  C11  C12  S2  .  .  .  119.3(3)  ?
  C13  C12  S2  .  .  .  119.6(3)  ?
  C12  C13  C14  .  .  .  122.4(4)  ?
  C12  C13  H13  .  .  .  119.4(4)  ?
  C14  C13  H13  .  .  .  118.2(4)  ?
  C13  C14  C141  .  .  .  120.8(4)  ?
  C13  C14  C15  .  .  .  116.5(4)  ?
  C141  C14  C15  .  .  .  122.6(4)  ?
  C14  C141  C142  .  .  .  108.4(4)  ?
  C14  C141  C143  .  .  .  110.1(4)  ?
  C14  C141  C144  .  .  .  113.9(4)  ?
  C142  C141  C143  .  .  .  105.3(5)  ?
  C142  C141  C144  .  .  .  106.6(5)  ?
  C143  C141  C144  .  .  .  112.0(5)  ?
  C141  C142  H142a  .  .  .  109.8(6)  ?
  C141  C142  H142b  .  .  .  110.4(5)  ?
  C141  C142  H142c  .  .  .  111.7(7)  ?
  H142a  C142  H142b  .  .  .  107.2(7)  ?
  H142a  C142  H142c  .  .  .  108.3(6)  ?
  H142b  C142  H142c  .  .  .  109.2(7)  ?
  C141  C143  H143a  .  .  .  110.8(6)  ?
  C141  C143  H143b  .  .  .  111.0(6)  ?
  C141  C143  H143c  .  .  .  110.2(5)  ?
  H143a  C143  H143b  .  .  .  108.3(6)  ?
  H143a  C143  H143c  .  .  .  107.9(7)  ?
  H143b  C143  H143c  .  .  .  108.5(7)  ?
  C141  C144  H144a  .  .  .  110.8(6)  ?
  C141  C144  H144b  .  .  .  110.7(8)  ?
  C141  C144  H144c  .  .  .  110.7(6)  ?
  H144a  C144  H144b  .  .  .  108.2(7)  ?
  H144a  C144  H144c  .  .  .  107.7(9)  ?
  H144b  C144  H144c  .  .  .  108.6(7)  ?
  C14  C15  C16  .  .  .  122.2(4)  ?
  C14  C15  H15  .  .  .  118.7(4)  ?
  C16  C15  H15  .  .  .  119.0(4)  ?
  C11  C16  C15  .  .  .  119.9(4)  ?
  C11  C16  S1  .  .  .  121.1(3)  ?
  C15  C16  S1  .  .  .  118.8(3)  ?
  C16  S1  C42  .  .  .  103.01(19)  ?
  C21  O21  H21  .  .  .  126(4)  ?
  O21  C21  C22  .  .  .  122.3(4)  ?
  O21  C21  C26  .  .  .  119.9(4)  ?
  C22  C21  C26  .  .  .  117.7(4)  ?
  C21  C22  C23  .  .  .  121.1(4)  ?
  C21  C22  S3  .  .  .  120.5(3)  ?
  C23  C22  S3  .  .  .  118.0(3)  ?
  C22  C23  C24  .  .  .  122.0(4)  ?
  C22  C23  H23  .  .  .  119.1(4)  ?
  C24  C23  H23  .  .  .  118.8(4)  ?
  C23  C24  C241  .  .  .  121.8(4)  ?
  C23  C24  C25  .  .  .  116.5(4)  ?
  C241  C24  C25  .  .  .  121.7(4)  ?
  C24  C241  C242  .  .  .  113.4(5)  ?
  C24  C241  C243  .  .  .  111.2(5)  ?
  C24  C241  C244  .  .  .  113.5(5)  ?
  C24  C241  C242'  .  .  .  103.7(5)  ?
  C24  C241  C243'  .  .  .  110.7(5)  ?
  C24  C241  C244'  .  .  .  110.5(6)  ?
  C242  C241  C243  .  .  .  109.1(7)  ?
  C242  C241  C244  .  .  .  106.3(6)  ?
  C242  C241  C242'  .  .  .  28.0(8)  ?
  C242  C241  C243'  .  .  .  79.4(7)  ?
  C242  C241  C244'  .  .  .  127.4(7)  ?
  C243  C241  C244  .  .  .  102.7(7)  ?
  C243  C241  C242'  .  .  .  135.1(8)  ?
  C243  C241  C243'  .  .  .  33.8(8)  ?
  C243  C241  C244'  .  .  .  79.4(7)  ?
  C244  C241  C242'  .  .  .  87.8(7)  ?
  C244  C241  C243'  .  .  .  127.8(7)  ?
  C244  C241  C244'  .  .  .  27.0(6)  ?
  C242'  C241  C243'  .  .  .  107.4(8)  ?
  C242'  C241  C244'  .  .  .  114.0(8)  ?
  C243'  C241  C244'  .  .  .  110.3(8)  ?
  C241  C242  C242'  .  .  .  79.3(13)  ?
  C241  C242  C243'  .  .  .  50.9(5)  ?
  C241  C242  H242a  .  .  .  111.2(10)  ?
  C241  C242  H242b  .  .  .  111.6(10)  ?
  C241  C242  H242c  .  .  .  109.3(9)  ?
  C241  C242  H242'a  .  .  .  110.3(9)  ?
  C241  C242  H242'b  .  .  .  116.3(9)  ?
  C242'  C242  C243'  .  .  .  130.2(15)  ?
  C242'  C242  H242a  .  .  .  102.2(15)  ?
  C242'  C242  H242b  .  .  .  138.3(18)  ?
  C242'  C242  H242c  .  .  .  35.2(11)  ?
  C242'  C242  H242'a  .  .  .  61.4(12)  ?
  C242'  C242  H242'b  .  .  .  69.8(13)  ?
  C243'  C242  H242a  .  .  .  94.6(9)  ?
  C243'  C242  H242b  .  .  .  73.8(8)  ?
  C243'  C242  H242c  .  .  .  155.8(10)  ?
  C243'  C242  H242'a  .  .  .  128.2(10)  ?
  C243'  C242  H242'b  .  .  .  130.2(10)  ?
  H242a  C242  H242b  .  .  .  109.8(11)  ?
  H242a  C242  H242c  .  .  .  106.9(11)  ?
  H242a  C242  H242'a  .  .  .  42.0(5)  ?
  H242a  C242  H242'b  .  .  .  128.7(12)  ?
  H242b  C242  H242c  .  .  .  107.8(11)  ?
  H242b  C242  H242'a  .  .  .  136.5(12)  ?
  H242b  C242  H242'b  .  .  .  69.5(8)  ?
  H242c  C242  H242'a  .  .  .  67.8(7)  ?
  H242c  C242  H242'b  .  .  .  39.4(5)  ?
  H242'a  C242  H242'b  .  .  .  101.6(11)  ?
  C241  C243  C243'  .  .  .  71.0(12)  ?
  C241  C243  C244'  .  .  .  47.9(6)  ?
  C241  C243  H243a  .  .  .  112.3(11)  ?
  C241  C243  H243b  .  .  .  111.5(11)  ?
  C241  C243  H243c  .  .  .  110.4(12)  ?
  C241  C243  H243'a  .  .  .  92.1(9)  ?
  C241  C243  H243'b  .  .  .  123.2(14)  ?
  C243'  C243  C244'  .  .  .  115.1(15)  ?
  C243'  C243  H243a  .  .  .  85.1(13)  ?
  C243'  C243  H243b  .  .  .  162.6(16)  ?
  C243'  C243  H243c  .  .  .  57.9(11)  ?
  C243'  C243  H243'a  .  .  .  47.7(9)  ?
  C243'  C243  H243'b  .  .  .  72.7(14)  ?
  C244'  C243  H243a  .  .  .  97.7(10)  ?
  C244'  C243  H243b  .  .  .  74.6(9)  ?
  C244'  C243  H243c  .  .  .  152.8(12)  ?
  C244'  C243  H243'a  .  .  .  108.0(9)  ?
  C244'  C243  H243'b  .  .  .  155.3(13)  ?
  H243a  C243  H243b  .  .  .  108.6(14)  ?
  H243a  C243  H243c  .  .  .  107.1(13)  ?
  H243a  C243  H243'a  .  .  .  37.6(5)  ?
  H243a  C243  H243'b  .  .  .  106.5(15)  ?
  H243b  C243  H243c  .  .  .  106.6(12)  ?
  H243b  C243  H243'a  .  .  .  145.9(13)  ?
  H243b  C243  H243'b  .  .  .  92.7(14)  ?
  H243c  C243  H243'a  .  .  .  86.3(10)  ?
  H243c  C243  H243'b  .  .  .  15.5(4)  ?
  H243'a  C243  H243'b  .  .  .  94.4(13)  ?
  C241  C244  C244'  .  .  .  67.6(13)  ?
  C241  C244  H244a  .  .  .  111.0(9)  ?
  C241  C244  H244b  .  .  .  110.9(9)  ?
  C241  C244  H244c  .  .  .  110.3(8)  ?
  C241  C244  H244'a  .  .  .  94.7(7)  ?
  C241  C244  H244'b  .  .  .  124.7(11)  ?
  C244'  C244  H244a  .  .  .  99.9(15)  ?
  C244'  C244  H244b  .  .  .  149.1(16)  ?
  C244'  C244  H244c  .  .  .  50.1(12)  ?
  C244'  C244  H244'a  .  .  .  55.4(12)  ?
  C244'  C244  H244'b  .  .  .  91.9(16)  ?
  H244a  C244  H244b  .  .  .  108.7(10)  ?
  H244a  C244  H244c  .  .  .  107.8(11)  ?
  H244a  C244  H244'a  .  .  .  44.8(4)  ?
  H244a  C244  H244'b  .  .  .  123.1(14)  ?
  H244b  C244  H244c  .  .  .  108.1(10)  ?
  H244b  C244  H244'a  .  .  .  149.9(10)  ?
  H244b  C244  H244'b  .  .  .  62.8(9)  ?
  H244c  C244  H244'a  .  .  .  75.6(8)  ?
  H244c  C244  H244'b  .  .  .  45.3(7)  ?
  H244'a  C244  H244'b  .  .  .  115.3(13)  ?
  C241  C242'  C242  .  .  .  72.6(13)  ?
  C241  C242'  H242a  .  .  .  90.8(8)  ?
  C241  C242'  H242c  .  .  .  147.1(17)  ?
  C241  C242'  H242'a  .  .  .  113.1(10)  ?
  C241  C242'  H242'b  .  .  .  110.7(11)  ?
  C241  C242'  H242'c  .  .  .  111.8(11)  ?
  C242  C242'  H242a  .  .  .  44.8(11)  ?
  C242  C242'  H242c  .  .  .  96(2)  ?
  C242  C242'  H242'a  .  .  .  75.6(14)  ?
  C242  C242'  H242'b  .  .  .  65.5(15)  ?
  C242  C242'  H242'c  .  .  .  171(2)  ?
  H242a  C242'  H242c  .  .  .  102.9(15)  ?
  H242a  C242'  H242'a  .  .  .  32.1(5)  ?
  H242a  C242'  H242'b  .  .  .  95.3(11)  ?
  H242a  C242'  H242'c  .  .  .  140.2(12)  ?
  H242c  C242'  H242'a  .  .  .  92.9(13)  ?
  H242c  C242'  H242'b  .  .  .  39.2(10)  ?
  H242c  C242'  H242'c  .  .  .  75.9(15)  ?
  H242'a  C242'  H242'b  .  .  .  106.8(13)  ?
  H242'a  C242'  H242'c  .  .  .  108.3(14)  ?
  H242'b  C242'  H242'c  .  .  .  105.7(12)  ?
  C241  C243'  C242  .  .  .  49.7(5)  ?
  C241  C243'  C243  .  .  .  75.2(12)  ?
  C241  C243'  H243a  .  .  .  98.6(8)  ?
  C241  C243'  H243c  .  .  .  117.8(10)  ?
  C241  C243'  H243'a  .  .  .  110.3(9)  ?
  C241  C243'  H243'b  .  .  .  109.0(9)  ?
  C241  C243'  H243'c  .  .  .  112.4(11)  ?
  C242  C243'  C243  .  .  .  118.7(13)  ?
  C242  C243'  H243a  .  .  .  108.9(8)  ?
  C242  C243'  H243c  .  .  .  157.6(11)  ?
  C242  C243'  H243'a  .  .  .  87.6(9)  ?
  C242  C243'  H243'b  .  .  .  158.4(10)  ?
  C242  C243'  H243'c  .  .  .  81.2(10)  ?
  C243  C243'  H243a  .  .  .  49.4(10)  ?
  C243  C243'  H243c  .  .  .  65.5(13)  ?
  C243  C243'  H243'a  .  .  .  88.9(14)  ?
  C243  C243'  H243'b  .  .  .  46.6(11)  ?
  C243  C243'  H243'c  .  .  .  153.6(16)  ?
  H243a  C243'  H243c  .  .  .  90.5(12)  ?
  H243a  C243'  H243'a  .  .  .  39.8(5)  ?
  H243a  C243'  H243'b  .  .  .  74.4(9)  ?
  H243a  C243'  H243'c  .  .  .  144.7(11)  ?
  H243c  C243'  H243'a  .  .  .  114.8(14)  ?
  H243c  C243'  H243'b  .  .  .  19.3(3)  ?
  H243c  C243'  H243'c  .  .  .  89.5(10)  ?
  H243'a  C243'  H243'b  .  .  .  105.8(13)  ?
  H243'a  C243'  H243'c  .  .  .  110.3(12)  ?
  H243'b  C243'  H243'c  .  .  .  108.8(11)  ?
  C241  C244'  C243  .  .  .  52.7(6)  ?
  C241  C244'  C244  .  .  .  85.4(14)  ?
  C241  C244'  H244a  .  .  .  100.4(8)  ?
  C241  C244'  H244c  .  .  .  144.3(14)  ?
  C241  C244'  H244'a  .  .  .  112.7(10)  ?
  C241  C244'  H244'b  .  .  .  110.0(10)  ?
  C241  C244'  H244'c  .  .  .  111.9(10)  ?
  C243  C244'  C244  .  .  .  129.4(16)  ?
  C243  C244'  H244a  .  .  .  107.9(8)  ?
  C243  C244'  H244c  .  .  .  147.8(13)  ?
  C243  C244'  H244'a  .  .  .  85.7(8)  ?
  C243  C244'  H244'b  .  .  .  162.4(12)  ?
  C243  C244'  H244'c  .  .  .  80.6(8)  ?
  C244  C244'  H244a  .  .  .  47.1(11)  ?
  C244  C244'  H244c  .  .  .  82.8(15)  ?
  C244  C244'  H244'a  .  .  .  86.5(14)  ?
  C244  C244'  H244'b  .  .  .  41.9(10)  ?
  C244  C244'  H244'c  .  .  .  148.1(18)  ?
  H244a  C244'  H244c  .  .  .  95.8(11)  ?
  H244a  C244'  H244'a  .  .  .  39.7(5)  ?
  H244a  C244'  H244'b  .  .  .  76.5(8)  ?
  H244a  C244'  H244'c  .  .  .  143.6(12)  ?
  H244c  C244'  H244'a  .  .  .  100.1(13)  ?
  H244c  C244'  H244'b  .  .  .  44.0(6)  ?
  H244c  C244'  H244'c  .  .  .  67.5(9)  ?
  H244'a  C244'  H244'b  .  .  .  106.6(11)  ?
  H244'a  C244'  H244'c  .  .  .  109.1(12)  ?
  H244'b  C244'  H244'c  .  .  .  106.2(11)  ?
  C24  C25  C26  .  .  .  122.5(4)  ?
  C24  C25  H25  .  .  .  118.7(4)  ?
  C26  C25  H25  .  .  .  118.8(4)  ?
  C21  C26  C25  .  .  .  120.2(4)  ?
  C21  C26  S2  .  .  .  122.3(3)  ?
  C25  C26  S2  .  .  .  117.2(3)  ?
  C12  S2  C26  .  .  .  105.5(2)  ?
  C31  O31  K  .  .  '4 556'  108.0(2)  ?
  O31  C31  C32  .  .  .  120.9(3)  ?
  O31  C31  C36  .  .  .  121.5(4)  ?
  C32  C31  C36  .  .  .  117.6(4)  ?
  C31  C32  C33  .  .  .  120.1(4)  ?
  C31  C32  S4  .  .  .  121.5(3)  ?
  C33  C32  S4  .  .  .  117.7(3)  ?
  C32  C33  C34  .  .  .  122.6(4)  ?
  C32  C33  H33  .  .  .  118.8(4)  ?
  C34  C33  H33  .  .  .  118.6(4)  ?
  C33  C34  C341  .  .  .  120.9(4)  ?
  C33  C34  C35  .  .  .  116.3(4)  ?
  C341  C34  C35  .  .  .  122.8(4)  ?
  C34  C341  C342  .  .  .  108.9(4)  ?
  C34  C341  C343  .  .  .  111.4(4)  ?
  C34  C341  C344  .  .  .  115.4(5)  ?
  C34  C341  C342'  .  .  .  104.3(11)  ?
  C34  C341  C343'  .  .  .  112.8(12)  ?
  C34  C341  C344'  .  .  .  100.5(9)  ?
  C342  C341  C343  .  .  .  104.7(5)  ?
  C342  C341  C344  .  .  .  107.0(5)  ?
  C342  C341  C342'  .  .  .  62.2(11)  ?
  C342  C341  C343'  .  .  .  62.2(11)  ?
  C342  C341  C344'  .  .  .  150.0(9)  ?
  C343  C341  C344  .  .  .  108.7(5)  ?
  C343  C341  C342'  .  .  .  144.3(11)  ?
  C343  C341  C343'  .  .  .  44.3(12)  ?
  C343  C341  C344'  .  .  .  68.7(9)  ?
  C344  C341  C342'  .  .  .  52.9(11)  ?
  C344  C341  C343'  .  .  .  131.3(12)  ?
  C344  C341  C344'  .  .  .  52.7(9)  ?
  C342'  C341  C343'  .  .  .  120.2(15)  ?
  C342'  C341  C344'  .  .  .  105.2(14)  ?
  C343'  C341  C344'  .  .  .  111.7(14)  ?
  C341  C342  C342'  .  .  .  56.1(10)  ?
  C341  C342  C343'  .  .  .  51.3(10)  ?
  C341  C342  H342a  .  .  .  111.2(6)  ?
  C341  C342  H342b  .  .  .  110.6(6)  ?
  C341  C342  H342c  .  .  .  110.4(6)  ?
  C341  C342  H342'b  .  .  .  84.8(4)  ?
  C341  C342  H343'c  .  .  .  82.7(4)  ?
  C342'  C342  C343'  .  .  .  104.3(14)  ?
  C342'  C342  H342a  .  .  .  96.9(11)  ?
  C342'  C342  H342b  .  .  .  154.6(12)  ?
  C342'  C342  H342c  .  .  .  64.4(11)  ?
  C342'  C342  H342'b  .  .  .  37.4(10)  ?
  C342'  C342  H343'c  .  .  .  138.7(11)  ?
  C343'  C342  H342a  .  .  .  90.9(11)  ?
  C343'  C342  H342b  .  .  .  74.1(11)  ?
  C343'  C342  H342c  .  .  .  158.3(12)  ?
  C343'  C342  H342'b  .  .  .  136.0(11)  ?
  C343'  C342  H343'c  .  .  .  37.5(10)  ?
  H342a  C342  H342b  .  .  .  108.5(7)  ?
  H342a  C342  H342c  .  .  .  108.3(7)  ?
  H342a  C342  H342'b  .  .  .  110.3(6)  ?
  H342a  C342  H343'c  .  .  .  98.1(6)  ?
  H342b  C342  H342c  .  .  .  107.8(7)  ?
  H342b  C342  H342'b  .  .  .  128.9(7)  ?
  H342b  C342  H343'c  .  .  .  36.9(3)  ?
  H342c  C342  H342'b  .  .  .  27.6(2)  ?
  H342c  C342  H343'c  .  .  .  142.7(7)  ?
  H342'b  C342  H343'c  .  .  .  151.5(6)  ?
  C341  C343  C343'  .  .  .  57.5(14)  ?
  C341  C343  C344'  .  .  .  58.7(9)  ?
  C341  C343  H343a  .  .  .  110.1(6)  ?
  C341  C343  H343b  .  .  .  110.0(7)  ?
  C341  C343  H343c  .  .  .  109.1(6)  ?
  C341  C343  H343'a  .  .  .  79.2(4)  ?
  C341  C343  H343'b  .  .  .  95.5(6)  ?
  C343'  C343  C344'  .  .  .  114.8(16)  ?
  C343'  C343  H343a  .  .  .  91.7(15)  ?
  C343'  C343  H343b  .  .  .  157.9(16)  ?
  C343'  C343  H343c  .  .  .  64.2(14)  ?
  C343'  C343  H343'a  .  .  .  45.1(14)  ?
  C343'  C343  H343'b  .  .  .  53.7(14)  ?
  C344'  C343  H343a  .  .  .  97.7(10)  ?
  C344'  C343  H343b  .  .  .  61.2(9)  ?
  C344'  C343  H343c  .  .  .  154.0(10)  ?
  C344'  C343  H343'a  .  .  .  110.8(9)  ?
  C344'  C343  H343'b  .  .  .  144.9(11)  ?
  H343a  C343  H343b  .  .  .  110.3(7)  ?
  H343a  C343  H343c  .  .  .  108.3(8)  ?
  H343a  C343  H343'a  .  .  .  46.7(3)  ?
  H343a  C343  H343'b  .  .  .  114.5(8)  ?
  H343b  C343  H343c  .  .  .  109.1(7)  ?
  H343b  C343  H343'a  .  .  .  156.3(7)  ?
  H343b  C343  H343'b  .  .  .  115.5(8)  ?
  H343c  C343  H343'a  .  .  .  87.0(6)  ?
  H343c  C343  H343'b  .  .  .  13.56(12)  ?
  H343'a  C343  H343'b  .  .  .  84.1(6)  ?
  C341  C344  C342'  .  .  .  63.2(12)  ?
  C341  C344  C344'  .  .  .  70.2(11)  ?
  C341  C344  H344a  .  .  .  110.7(7)  ?
  C341  C344  H344b  .  .  .  109.4(7)  ?
  C341  C344  H344c  .  .  .  110.2(7)  ?
  C341  C344  H342'c  .  .  .  90.8(5)  ?
  C342'  C344  C344'  .  .  .  132.9(16)  ?
  C342'  C344  H344a  .  .  .  103.2(13)  ?
  C342'  C344  H344b  .  .  .  52.0(12)  ?
  C342'  C344  H344c  .  .  .  146.1(14)  ?
  C342'  C344  H342'c  .  .  .  41.3(12)  ?
  C344'  C344  H344a  .  .  .  99.1(12)  ?
  C344'  C344  H344b  .  .  .  150.2(13)  ?
  C344'  C344  H344c  .  .  .  49.1(11)  ?
  C344'  C344  H342'c  .  .  .  137.2(12)  ?
  H344a  C344  H344b  .  .  .  108.2(8)  ?
  H344a  C344  H344c  .  .  .  109.8(8)  ?
  H344a  C344  H342'c  .  .  .  123.6(7)  ?
  H344b  C344  H344c  .  .  .  108.5(8)  ?
  H344b  C344  H342'c  .  .  .  20.0(2)  ?
  H344c  C344  H342'c  .  .  .  110.0(7)  ?
  C341  C342'  C342  .  .  .  61.7(11)  ?
  C341  C342'  C344  .  .  .  64.0(12)  ?
  C341  C342'  H342c  .  .  .  91.9(15)  ?
  C341  C342'  H344b  .  .  .  105(2)  ?
  C341  C342'  H342'a  .  .  .  112(2)  ?
  C341  C342'  H342'b  .  .  .  110(2)  ?
  C341  C342'  H342'c  .  .  .  111(2)  ?
  C342  C342'  C344  .  .  .  115.9(18)  ?
  C342  C342'  H342c  .  .  .  36.5(7)  ?
  C342  C342'  H344b  .  .  .  161(2)  ?
  C342  C342'  H342'a  .  .  .  88.6(19)  ?
  C342  C342'  H342'b  .  .  .  63.3(14)  ?
  C342  C342'  H342'c  .  .  .  162(3)  ?
  C344  C342'  H342c  .  .  .  152(2)  ?
  C344  C342'  H344b  .  .  .  46.0(11)  ?
  C344  C342'  H342'a  .  .  .  82(2)  ?
  C344  C342'  H342'b  .  .  .  171(3)  ?
  C344  C342'  H342'c  .  .  .  70.9(17)  ?
  H342c  C342'  H344b  .  .  .  162(2)  ?
  H342c  C342'  H342'a  .  .  .  96(2)  ?
  H342c  C342'  H342'b  .  .  .  27.4(8)  ?
  H342c  C342'  H342'c  .  .  .  134(3)  ?
  H344b  C342'  H342'a  .  .  .  85(2)  ?
  H344b  C342'  H342'b  .  .  .  135(3)  ?
  H344b  C342'  H342'c  .  .  .  31.7(8)  ?
  H342'a  C342'  H342'b  .  .  .  107(3)  ?
  H342'a  C342'  H342'c  .  .  .  110(3)  ?
  H342'b  C342'  H342'c  .  .  .  107(3)  ?
  C341  C343'  C342  .  .  .  66.5(12)  ?
  C341  C343'  C343  .  .  .  78.2(16)  ?
  C341  C343'  H343a  .  .  .  94.9(16)  ?
  C341  C343'  H343c  .  .  .  116(2)  ?
  C341  C343'  H343'a  .  .  .  106(2)  ?
  C341  C343'  H343'b  .  .  .  109(2)  ?
  C341  C343'  H343'c  .  .  .  110(2)  ?
  C342  C343'  C343  .  .  .  141(2)  ?
  C342  C343'  H343a  .  .  .  124.5(17)  ?
  C342  C343'  H343c  .  .  .  164(2)  ?
  C342  C343'  H343'a  .  .  .  91.8(18)  ?
  C342  C343'  H343'b  .  .  .  159(3)  ?
  C342  C343'  H343'c  .  .  .  53.5(13)  ?
  C343  C343'  H343a  .  .  .  39.8(9)  ?
  C343  C343'  H343c  .  .  .  51.4(12)  ?
  C343  C343'  H343'a  .  .  .  81(2)  ?
  C343  C343'  H343'b  .  .  .  50.5(13)  ?
  C343  C343'  H343'c  .  .  .  164(3)  ?
  H343a  C343'  H343c  .  .  .  71.8(14)  ?
  H343a  C343'  H343'a  .  .  .  41.6(10)  ?
  H343a  C343'  H343'b  .  .  .  75.8(17)  ?
  H343a  C343'  H343'c  .  .  .  147(2)  ?
  H343c  C343'  H343'a  .  .  .  102(2)  ?
  H343c  C343'  H343'b  .  .  .  7.8(3)  ?
  H343c  C343'  H343'c  .  .  .  113(2)  ?
  H343'a  C343'  H343'b  .  .  .  109(3)  ?
  H343'a  C343'  H343'c  .  .  .  109(2)  ?
  H343'b  C343'  H343'c  .  .  .  114(3)  ?
  C341  C344'  C343  .  .  .  52.6(8)  ?
  C341  C344'  C344  .  .  .  57.1(10)  ?
  C341  C344'  H344c  .  .  .  92.3(16)  ?
  C341  C344'  H344'a  .  .  .  108.7(19)  ?
  C341  C344'  H344'b  .  .  .  110(2)  ?
  C341  C344'  H344'c  .  .  .  112(2)  ?
  C343  C344'  C344  .  .  .  99.0(14)  ?
  C343  C344'  H344c  .  .  .  141(2)  ?
  C343  C344'  H344'a  .  .  .  92.2(17)  ?
  C343  C344'  H344'b  .  .  .  159(2)  ?
  C343  C344'  H344'c  .  .  .  71.5(15)  ?
  C344  C344'  H344c  .  .  .  41.8(9)  ?
  C344  C344'  H344'a  .  .  .  76.4(16)  ?
  C344  C344'  H344'b  .  .  .  75.7(16)  ?
  C344  C344'  H344'c  .  .  .  169(3)  ?
  H344c  C344'  H344'a  .  .  .  82.3(18)  ?
  H344c  C344'  H344'b  .  .  .  36.7(9)  ?
  H344c  C344'  H344'c  .  .  .  147(3)  ?
  H344'a  C344'  H344'b  .  .  .  106(2)  ?
  H344'a  C344'  H344'c  .  .  .  109(2)  ?
  H344'b  C344'  H344'c  .  .  .  111(2)  ?
  C34  C35  C36  .  .  .  122.5(4)  ?
  C34  C35  H35  .  .  .  118.6(4)  ?
  C36  C35  H35  .  .  .  119.0(4)  ?
  C31  C36  C35  .  .  .  120.9(4)  ?
  C31  C36  S3  .  .  .  120.4(3)  ?
  C35  C36  S3  .  .  .  118.2(3)  ?
  C22  S3  C36  .  .  .  106.0(2)  ?
  K  O41  C41  .  .  .  132.5(3)  ?
  K  O41  H41  .  .  .  117(3)  ?
  C41  O41  H41  .  .  .  110(3)  ?
  O41  C41  C42  .  .  .  119.2(4)  ?
  O41  C41  C46  .  .  .  121.6(4)  ?
  C42  C41  C46  .  .  .  119.2(4)  ?
  S1  C42  C41  .  .  .  121.0(3)  ?
  S1  C42  C43  .  .  .  119.4(3)  ?
  C41  C42  C43  .  .  .  119.5(4)  ?
  C42  C43  C44  .  .  .  122.2(4)  ?
  C42  C43  H43  .  .  .  119.3(4)  ?
  C44  C43  H43  .  .  .  118.5(4)  ?
  C43  C44  C441  .  .  .  120.8(5)  ?
  C43  C44  C45  .  .  .  117.2(4)  ?
  C441  C44  C45  .  .  .  121.9(5)  ?
  C44  C441  C442  .  .  .  113.2(7)  ?
[truncated: 577,829 more chars]
